# Supplementary material
Source: publisher figshare collection journal article supplement (https://tandf.figshare.com/articles/dataset/_/11363777)
Supplement: Supplementary file 1 [file 2]

## Supplementary Table S2

DOI: 10.2989/00306525.2019.1645054

Ostrich: Journal of African Ornithology 2020, 91(2)

Special Issue: Citizen Science

### Summarising biometrics from the SAFRING database for southern African birds

Rose, Thomson, Oschadleus and Lee

**Table S2:** Subset of 70 southern African bird species for which there was insufficient ringing and retrap records in the SAFRING database to yield biometric summaries. These species are highlighted because several are either endemic or relatively common and could therefore be important candidates for future research. ADU number = number assigned by the Animal Demography Unit at the University of Cape Town, South Africa. Mass (g) = mean value of weights entered in the database.

| ADU number | Common name             | Mass  |
|------------|-------------------------|-------|
| 1          | Common Ostrich          | 68700 |
| 173        | Coqui Francolin         | 254   |
| 178        | Red-winged Francolin    | 463   |
| 177        | Shelley's Francolin     | 500   |
| 188        | Red-necked Spurfowl     | 712   |
| 104        | White-backed Duck       | 659   |
| 103        | Maccoa Duck             | 820   |
| 1016       | Mallard                 | 1145  |
| 416        | Broad-billed Roller     | 110   |
| 340        | Common Cuckoo           | 138   |
| 328        | Brown-headed Parrot     | 145   |
| 380        | African Black Swift     | 42.1  |
| 381        | Bradfield's Swift       | 42.4  |
| 219        | Denham's Bustard        | 8640  |
| 220        | Karoo Korhaan           | 1600  |
| 223        | Blue Korhaan            | 1420  |
| 222        | White-bellied Korhaan   | 1400  |
| 227        | Black-bellied Bustard   | 2250  |
| 214        | Grey Crowned Crane      | 4100  |
| 215        | Wattled Crane           | 8970  |
| 213        | African Finfoot         | 627   |
| 267        | Eurasian Curlew         | 590   |
| 282        | Black-winged Pratincole | 101.8 |
| 290        | Caspian Tern            | 690   |
| 172        | Western Osprey          | 1570  |
| 127        | African Cuckoo Hawk     | 348   |
| 132        | European Honey Buzzard  | 748   |
| 109        | White-headed Vulture    | 4680  |
| 151        | Bateleur                | 2240  |
| 167        | African Marsh Harrier   | 570   |
| 168        | Pallid Harrier          | 438   |
| 170        | Montagu's Harrier       | 370   |
| 157        | Ovambo Sparrowhawk      | 196   |
| 135        | Steppe Eagle            | 2990  |
| 136        | Lesser Spotted Eagle    | 1500  |
| 115        | Eurasian Hobby          | 229   |
| 4          | Great Crested Grebe     | 621   |
| 5          | Black-necked Grebe      | 298   |
| 64         | Black Heron             | 313   |
| 59         | Little Egret            | 532   |
| 60         | Yellow-billed Egret     | 457   |
| 58         | Great Egret             | 1110  |
| 56         | Goliath Heron           | 4330  |

|     |                           |       |
|-----|---------------------------|-------|
| 57  | Purple Heron              | 917.5 |
| 69  | Black-crowned Night Heron | 682   |
| 70  | White-backed Night Heron  | 440   |
| 82  | Southern Bald Ibis        | 1075  |
| 85  | African Spoonbill         | 1665  |
| 41  | Pink-backed Pelican       | 5970  |
| 76  | Yellow-billed Stork       | 1760  |
| 74  | African Openbill          | 1240  |
| 79  | Black Stork               | 3200  |
| 78  | Abdim's Stork             | 1300  |
| 77  | Woolly-necked Stork       | 1680  |
| 75  | Saddle-billed Stork       | 7300  |
| 73  | Marabou Stork             | 7100  |
| 29  | Sooty Shearwater          | 787   |
| 524 | White-necked Raven        | 865   |
| 626 | Karoo Eremomela           | 8.2   |
| 613 | Cinnamon-breasted Warbler | 11.5  |
| 461 | Karoo Lark                | 30.4  |
| 464 | Dusky Lark                | 39.7  |
| 465 | Short-clawed Lark         | 38.6  |
| 486 | Black-eared Sparrow-lark  | 15    |
| 697 | African Rock Pipit        | 30.8  |
| 472 | Botha's Lark              | 19    |
| 473 | Rudd's Lark               | 26    |
| 479 | Red Lark                  | 37    |
| 491 | Sclater's Lark            | 20    |
| 928 | Mountain Pipit            | 27    |

---
