# Supplementary material
Source: publisher figshare collection journal article supplement (https://tandf.figshare.com/articles/dataset/_/11363777)
Supplement: Supplementary file 2 [file 2]

Supplementary Table S1

DOI: 10.2989/00306525.2019.1645054

Ostrich: Journal of African Ornithology 2020, 91(2)

Special Issue: Citizen Science

Summarising biometrics from the SAFRING database for southern African birds

Rose, Thomson, Oschadleus and Lee

**Table S1:** Summary of available biometric data for 674 bird species in the SAFRING database, extracted between July–November 2018. ADU number = number assigned by the Animal Demography Unit at the University of Cape Town, South Africa; *N* = total number of ringing and retrap records in the database per species; *n* = number remaining after data cleaning and validation, *lq* = lower quartile, *uq* = upper quartile. Biometrics included were: mass (g), wing length (mm), tarsus length (mm), culmen length (mm), tail length (mm) and head length (mm). Sex-specific size differences were noted as ‘Yes’ or ‘Unknown’ and are further summarised in Table S3.

| Order        | Family   | ADU number | English             | Latin                   | Metric | lq  | uq   | Mean  | SD    | <i>n</i> | <i>N</i> | Sex difference |
|--------------|----------|------------|---------------------|-------------------------|--------|-----|------|-------|-------|----------|----------|----------------|
| Anseriformes | Anatidae | 95         | African Black Duck  | <i>Anas sparsa</i>      | Mass   | 726 | 1228 | 977.6 | 156.3 | 105      | 208      | Yes            |
|              |          |            |                     |                         | Wing   | 238 | 279  | 260.5 | 19.3  | 47       | 208      | Unknown        |
|              |          |            |                     |                         | Head   | 100 | 108  | 103.5 | 2.9   | 8        | 208      | Unknown        |
|              |          |            |                     |                         | Culmen | 45  | 53   | 48.7  | 2.5   | 9        | 208      | Unknown        |
|              |          |            |                     |                         | Tarsus | 44  | 47   | 45.5  | 1.8   | 3        | 208      | Unknown        |
|              |          | 92         | African Pygmy Goose | <i>Nettapus auritus</i> | Tail   | 100 | 131  | 114.6 | 10.6  | 9        | 208      | Unknown        |
|              |          |            |                     |                         | Mass   | 197 | 556  | 287   | 162.3 | 30       | 41       | Unknown        |
|              |          |            |                     |                         | Wing   | 153 | 166  | 160.3 | 4.5   | 25       | 41       | Unknown        |
|              |          |            |                     |                         | Head   | 57  | 62   | 59.5  | 1.8   | 20       | 41       | Unknown        |
|              |          |            |                     |                         | Culmen | 24  | 28   | 26.2  | 1.4   | 20       | 41       | Unknown        |
|              |          | 94         | Cape Shoveler       | <i>Spatula smithii</i>  | Tarsus | 25  | 28   | 26.3  | 1.3   | 19       | 41       | Unknown        |
|              |          |            |                     |                         | Tail   | 66  | 71   | 68.4  | 1.5   | 9        | 41       | Unknown        |
|              |          |            |                     |                         | Mass   | 434 | 732  | 576   | 81.5  | 185      | 897      | Yes            |
|              |          |            |                     |                         | Wing   | 230 | 258  | 243.4 | 20.9  | 44       | 897      | Unknown        |
|              |          |            |                     |                         | Head   | 56  | 123  | 109.7 | 14.2  | 40       | 897      | Unknown        |
|              |          | 98         | Cape Teal           | <i>Anas capensis</i>    | Culmen | 55  | 70   | 61.3  | 3.8   | 40       | 897      | Unknown        |
|              |          |            |                     |                         | Tarsus | 36  | 43   | 39.6  | 1.8   | 36       | 897      | Unknown        |
|              |          |            |                     |                         | Tail   | 45  | 81   | 71.7  | 16.9  | 5        | 897      | Unknown        |
|              |          |            |                     |                         | Mass   | 40  | 556  | 422.8 | 116.7 | 297      | 1099     | Yes            |
|              |          |            |                     |                         | Wing   | 177 | 221  | 200.2 | 15.2  | 234      | 1099     | Unknown        |
|              |          |            |                     |                         | Head   | 44  | 98   | 88.4  | 9.9   | 133      | 1099     | Unknown        |
|              |          |            |                     |                         | Culmen | 37  | 69   | 42.2  | 7.1   | 147      | 1099     | Unknown        |
|              |          |            |                     |                         | Tarsus | 32  | 45   | 37.5  | 3.7   | 118      | 1099     | Unknown        |
|              |          |            |                     |                         | Tail   | 39  | 91   | 66.4  | 13.7  | 26       | 1099     | Unknown        |

|                           |                                |        |      |      |        |        |      |       |         |
|---------------------------|--------------------------------|--------|------|------|--------|--------|------|-------|---------|
| 89 Egyptian Goose         | <i>Alopochen aegyptiaca</i>    | Mass   | 3    | 3089 | 2121.3 | 606.4  | 1258 | 4755  | No      |
|                           |                                | Wing   | 167  | 426  | 322    | 74     | 1018 | 4755  | No      |
|                           |                                | Head   | 100  | 119  | 109.3  | 5.1    | 889  | 4755  | Unknown |
|                           |                                | Culmen | 45   | 58   | 51.2   | 3.2    | 1053 | 4755  | Unknown |
|                           |                                | Tarsus | 72   | 95   | 84.3   | 6.4    | 872  | 4755  | Unknown |
|                           |                                | Tail   | 100  | 155  | 124.8  | 17.3   | 47   | 4755  | Unknown |
| 885 Garganey              | <i>Spatula querquedula</i>     | Mass   | 351  | 458  | 412.7  | 34.7   | 10   | 22    | Unknown |
|                           |                                | Wing   | 140  | 205  | 189.1  | 23.1   | 10   | 22    | Unknown |
| 99 Hottentot Teal         | <i>Spatula hottentota</i>      | Mass   | 215  | 315  | 269    | 25.3   | 547  | 901   | No      |
|                           |                                | Wing   | 144  | 161  | 153.6  | 4.6    | 506  | 901   | Yes     |
|                           |                                | Head   | 72   | 81   | 76.1   | 2.7    | 39   | 901   | Unknown |
|                           |                                | Culmen | 33   | 42   | 36.9   | 2.7    | 42   | 901   | Unknown |
|                           |                                | Tarsus | 26   | 29   | 27.6   | 1.1    | 8    | 901   | Unknown |
|                           |                                | Tail   | 51   | 70   | 61.5   | 5.3    | 48   | 901   | Unknown |
| 91 Knob-billed Duck       | <i>Sarkidiornis melanotos</i>  | Mass   | 931  | 2091 | 1325.3 | 393    | 13   | 540   | Unknown |
|                           |                                | Wing   | 301  | 331  | 310.3  | 11.4   | 7    | 540   | Unknown |
|                           |                                | Head   | 102  | 117  | 110.7  | 7.5    | 4    | 540   | Unknown |
|                           |                                | Culmen | 48   | 67   | 59.2   | 8.8    | 4    | 540   | Unknown |
|                           |                                | Tarsus | 56   | 67   | 62.2   | 6      | 3    | 540   | Unknown |
|                           |                                | Tail   | 121  | 130  | 125.5  | 6.4    | 2    | 540   | Unknown |
| 97 Red-billed Teal        | <i>Anas erythrorhyncha</i>     | Mass   | 65   | 973  | 567.1  | 162.8  | 302  | 2374  | Yes     |
|                           |                                | Wing   | 189  | 237  | 219.8  | 14.9   | 259  | 2374  | Yes     |
|                           |                                | Head   | 74   | 99   | 91.1   | 6.4    | 166  | 2374  | Unknown |
|                           |                                | Culmen | 39   | 60   | 44.3   | 5.5    | 191  | 2374  | Unknown |
|                           |                                | Tarsus | 31   | 48   | 37.9   | 5.5    | 142  | 2374  | Unknown |
|                           |                                | Tail   | 71   | 91   | 80.1   | 6      | 34   | 2374  | Unknown |
| 90 South African Shelduck | <i>Tadorna cana</i>            | Mass   | 910  | 1845 | 1318.7 | 244.2  | 941  | 3110  | Yes     |
|                           |                                | Wing   | 230  | 365  | 317.4  | 36.8   | 107  | 3110  | Yes     |
|                           |                                | Head   | 91   | 116  | 102.5  | 8.5    | 107  | 3110  | Unknown |
|                           |                                | Culmen | 39   | 51   | 44.7   | 3.4    | 107  | 3110  | Unknown |
|                           |                                | Tarsus | 55   | 69   | 63     | 4.4    | 87   | 3110  | Unknown |
|                           |                                | Tail   | 91   | 146  | 122.5  | 16.8   | 33   | 3110  | No      |
| 102 Southern Pochard      | <i>Netta erythrophthalma</i>   | Mass   | 602  | 934  | 776.5  | 79.9   | 279  | 3912  | Yes     |
|                           |                                | Wing   | 215  | 221  | 219.2  | 2.8    | 6    | 3912  | Unknown |
|                           |                                | Head   | 98   | 98   | 98     | 0.7    | 2    | 3912  | Unknown |
|                           |                                | Culmen | 43   | 44   | 43.3   | 0.7    | 2    | 3912  | Unknown |
|                           |                                | Tarsus | 38   | 38   | 37.9   | 0.1    | 2    | 3912  | Unknown |
| 88 Spur-winged Goose      | <i>Plectropterus gambensis</i> | Mass   | 2200 | 6534 | 3965.2 | 1281.8 | 65   | 1310  | Unknown |
|                           |                                | Wing   | 216  | 540  | 433.9  | 88.5   | 36   | 1310  | Unknown |
|                           |                                | Head   | 131  | 163  | 146.6  | 9.6    | 30   | 1310  | Unknown |
|                           |                                | Culmen | 62   | 109  | 77     | 12.6   | 30   | 1310  | Unknown |
|                           |                                | Tarsus | 92   | 127  | 108.9  | 11.8   | 38   | 1310  | Unknown |
| 96 Yellow-billed Duck     | <i>Anas undulata</i>           | Mass   | 706  | 1140 | 922.1  | 113.2  | 9504 | 32497 | Yes     |
|                           |                                | Wing   | 208  | 285  | 259.8  | 20.4   | 792  | 32497 | Yes     |
|                           |                                | Head   | 91   | 118  | 107.3  | 9.9    | 525  | 32497 | Unknown |

|                |                |                                |                            |        |     |     |       |       |      |       |         |
|----------------|----------------|--------------------------------|----------------------------|--------|-----|-----|-------|-------|------|-------|---------|
| Apodiformes    | Dendrocygnidae | 101 Fulvous Whistling Duck     | <i>Dendrocygna bicolor</i> | Culmen | 45  | 63  | 51.5  | 5.3   | 665  | 32497 | Unknown |
|                |                |                                |                            | Tarsus | 39  | 53  | 44.8  | 3.2   | 444  | 32497 | Unknown |
|                |                |                                |                            | Tail   | 43  | 136 | 98.9  | 17.8  | 132  | 32497 | Unknown |
|                |                |                                |                            | Mass   | 589 | 793 | 677.1 | 81.1  | 8    | 52    | Unknown |
|                |                |                                |                            | Wing   | 207 | 237 | 225.6 | 9.1   | 17   | 52    | Unknown |
|                |                |                                |                            | Head   | 98  | 110 | 103.4 | 4.6   | 11   | 52    | Unknown |
|                |                |                                |                            | Culmen | 44  | 50  | 46.1  | 2     | 10   | 52    | Unknown |
|                |                | 100 White-faced Whistling Duck | <i>Dendrocygna viduata</i> | Tail   | 53  | 63  | 58.7  | 3.2   | 10   | 52    | Unknown |
|                |                |                                |                            | Mass   | 312 | 868 | 680.9 | 120.3 | 294  | 1817  | Unknown |
|                |                |                                |                            | Wing   | 208 | 246 | 228.3 | 21.4  | 254  | 1817  | Unknown |
|                |                |                                |                            | Head   | 77  | 100 | 92.8  | 8.5   | 30   | 1817  | Unknown |
|                |                |                                |                            | Culmen | 43  | 53  | 47.6  | 2.8   | 29   | 1817  | Unknown |
|                |                |                                |                            | Tarsus | 50  | 63  | 55.9  | 3.3   | 28   | 1817  | Unknown |
|                |                |                                |                            | Tail   | 58  | 73  | 65    | 5.2   | 18   | 1817  | Unknown |
|                | Apodidae       | 387 African Palm Swift         | <i>Cypsiurus parvus</i>    | Mass   | 13  | 18  | 15.3  | 1.3   | 340  | 642   | No      |
|                |                |                                |                            | Wing   | 125 | 145 | 134.4 | 17.1  | 255  | 642   | Unknown |
|                |                |                                |                            | Head   | 23  | 25  | 24    | 0.5   | 76   | 642   | Unknown |
|                |                |                                |                            | Culmen | 5   | 11  | 7.7   | 1.7   | 70   | 642   | Unknown |
|                |                |                                |                            | Tarsus | 8   | 12  | 10.1  | 1     | 34   | 642   | Unknown |
|                |                |                                |                            | Tail   | 72  | 112 | 98    | 11.6  | 94   | 642   | Unknown |
|                |                | 386 Alpine Swift               | <i>Tachymarptis melba</i>  | Mass   | 56  | 98  | 84.2  | 12.8  | 21   | 1381  | Unknown |
|                |                | 378 Common Swift               | <i>Apus apus</i>           | Mass   | 26  | 37  | 30.9  | 3.2   | 28   | 42    | Unknown |
|                |                |                                |                            | Head   | 31  | 33  | 31.9  | 0.7   | 23   | 42    | Unknown |
|                |                |                                |                            | Wing   | 164 | 175 | 171   | 3.5   | 25   | 42    | Unknown |
|                |                | 384 Horus Swift                | <i>Apus horus</i>          | Tail   | 68  | 81  | 75.2  | 4.1   | 18   | 42    | Unknown |
|                |                |                                |                            | Mass   | 25  | 35  | 29.7  | 2.5   | 142  | 429   | Unknown |
|                |                |                                |                            | Wing   | 155 | 160 | 158.2 | 1.9   | 10   | 429   | Unknown |
|                |                | 385 Little Swift               | <i>Apus affinis</i>        | Tarsus | 8   | 45  | 15    | 11.8  | 39   | 3809  | Unknown |
|                |                |                                |                            | Mass   | 20  | 32  | 27.1  | 7.4   | 1885 | 3809  | Unknown |
|                |                |                                |                            | Wing   | 122 | 140 | 131.9 | 8.8   | 1215 | 3809  | Unknown |
|                |                |                                |                            | Head   | 28  | 42  | 30.3  | 2.6   | 298  | 3809  | Unknown |
|                |                |                                |                            | Culmen | 6   | 45  | 13.9  | 12.1  | 291  | 3809  | Unknown |
|                |                |                                |                            | Tail   | 41  | 51  | 44.5  | 2.6   | 567  | 3809  | Unknown |
|                |                |                                |                            | Mass   | 22  | 30  | 25.9  | 2     | 1871 | 4082  | Unknown |
| Bucerotiformes | Bucerotidae    | 383 White-rumped Swift         | <i>Apus caffer</i>         | Wing   | 141 | 155 | 148.8 | 3.4   | 976  | 4082  | Unknown |
|                |                |                                |                            | Head   | 28  | 31  | 29.1  | 0.8   | 184  | 4082  | Unknown |
|                |                |                                |                            | Culmen | 6   | 12  | 8.8   | 2     | 159  | 4082  | Unknown |
|                |                |                                |                            | Tarsus | 7   | 13  | 10    | 1.4   | 60   | 4082  | Unknown |
|                |                |                                |                            | Tail   | 45  | 83  | 73.2  | 9.3   | 416  | 4082  | Unknown |
|                |                | 424 African Grey Hornbill      | <i>Lophoceros nasutus</i>  | Mass   | 138 | 254 | 191.4 | 30.6  | 208  | 422   | No      |
|                |                |                                |                            | Wing   | 166 | 232 | 209.9 | 16.2  | 174  | 422   | Yes     |
|                |                |                                |                            | Head   | 91  | 121 | 107.8 | 9     | 47   | 422   | Unknown |
|                |                |                                |                            | Culmen | 60  | 99  | 80.4  | 10.5  | 46   | 422   | Unknown |
|                |                |                                |                            | Tarsus | 31  | 42  | 35.4  | 3.1   | 22   | 422   | Unknown |
|                |                |                                |                            | Tail   | 94  | 234 | 199.6 | 29.7  | 57   | 422   | Yes     |

|                 |            |      |                                 |                                  |        |     |      |        |        |      |      |         |
|-----------------|------------|------|---------------------------------|----------------------------------|--------|-----|------|--------|--------|------|------|---------|
|                 |            | 427  | Crowned Hornbill                | <i>Lophoceros alboterminatus</i> | Mass   | 216 | 305  | 253.1  | 26.5   | 33   | 63   | No      |
|                 |            |      |                                 |                                  | Wing   | 233 | 264  | 249.1  | 9.9    | 31   | 63   | Unknown |
|                 |            |      |                                 |                                  | Culmen | 86  | 91   | 88.1   | 1.8    | 7    | 63   | Unknown |
|                 |            |      |                                 |                                  | Tarsus | 27  | 32   | 30.6   | 2.6    | 4    | 63   | Unknown |
|                 |            |      |                                 |                                  | Tail   | 201 | 227  | 217.3  | 11     | 6    | 63   | Unknown |
|                 |            | 429  | Monteiro's Hornbill             | <i>Tockus monteiri</i>           | Mass   | 275 | 431  | 367.4  | 268.1  | 191  | 727  | No      |
|                 |            |      |                                 |                                  | Wing   | 180 | 229  | 201.1  | 14.1   | 75   | 727  | Yes     |
|                 |            |      |                                 |                                  | Culmen | 93  | 106  | 99.5   | 3.6    | 29   | 727  | Unknown |
|                 |            | 425  | Red-billed Hornbill (pre-split) | <i>Tockus erythrorhynchus</i>    | Mass   | 124 | 205  | 159.9  | 21.5   | 756  | 1328 | Yes     |
|                 |            |      |                                 |                                  | Wing   | 165 | 197  | 181.5  | 8.4    | 649  | 1328 | Yes     |
|                 |            |      |                                 |                                  | Head   | 86  | 120  | 101.8  | 9.3    | 145  | 1328 | Unknown |
|                 |            |      |                                 |                                  | Culmen | 57  | 90   | 74.5   | 8.6    | 237  | 1328 | Unknown |
|                 |            |      |                                 |                                  | Tarsus | 36  | 46   | 40.8   | 2.6    | 92   | 1328 | Unknown |
|                 |            | 1508 | Southern Red-billed Hornbill    | <i>Tockus rufirostris</i>        | Tail   | 182 | 223  | 204.1  | 10.8   | 264  | 1328 | Yes     |
|                 |            |      |                                 |                                  | Mass   | 122 | 195  | 153.1  | 19.4   | 560  | 632  | Yes     |
|                 |            |      |                                 |                                  | Wing   | 163 | 194  | 178.3  | 8.3    | 553  | 632  | Yes     |
|                 |            |      |                                 |                                  | Head   | 87  | 118  | 99     | 8.4    | 440  | 632  | Unknown |
|                 |            |      |                                 |                                  | Culmen | 58  | 92   | 72     | 8.6    | 443  | 632  | Unknown |
|                 |            | 426  | Southern Yellow-billed Hornbill | <i>Tockus leucomelas</i>         | Tarsus | 36  | 45   | 40.5   | 2.7    | 394  | 632  | Unknown |
|                 |            |      |                                 |                                  | Tail   | 174 | 225  | 198.4  | 13.4   | 465  | 632  | Yes     |
|                 |            |      |                                 |                                  | Wing   | 175 | 221  | 197.6  | 12.8   | 852  | 1698 | Yes     |
|                 |            |      |                                 |                                  | Mass   | 145 | 290  | 218.7  | 39.5   | 1004 | 1698 | Yes     |
|                 |            |      |                                 |                                  | Head   | 92  | 129  | 109.5  | 17     | 344  | 1698 | Unknown |
|                 |            | 422  | Trumpeter Hornbill              | <i>Bycanistes bucinator</i>      | Culmen | 65  | 104  | 82.7   | 10.6   | 407  | 1698 | Unknown |
|                 |            |      |                                 |                                  | Tarsus | 37  | 49   | 43.5   | 6.4    | 285  | 1698 | Unknown |
|                 |            |      |                                 |                                  | Tail   | 109 | 250  | 214.6  | 29.4   | 382  | 1698 | Yes     |
|                 |            |      |                                 |                                  | Mass   | 509 | 875  | 664.9  | 113.3  | 21   | 81   | Unknown |
|                 |            |      |                                 |                                  | Wing   | 254 | 296  | 276.1  | 13.7   | 26   | 81   | Unknown |
| Charadriiformes | Bucorvidae | 430  | Southern Ground Hornbill        | <i>Bucorvus leadbeateri</i>      | Head   | 127 | 159  | 141.4  | 12.1   | 9    | 81   | Unknown |
|                 |            |      |                                 |                                  | Culmen | 101 | 147  | 119.5  | 16.5   | 10   | 81   | Unknown |
|                 |            |      |                                 |                                  | Tarsus | 46  | 52   | 48.4   | 2.7    | 4    | 81   | Unknown |
|                 |            |      |                                 |                                  | Tail   | 208 | 272  | 231.3  | 22.1   | 11   | 81   | Unknown |
|                 |            |      |                                 |                                  | Mass   | 4   | 4333 | 2100.7 | 1798.9 | 20   | 236  | Unknown |
|                 |            | 275  | Spotted Thick-knee              | <i>Burhinus capensis</i>         | Wing   | 507 | 615  | 566.1  | 35.6   | 17   | 236  | Unknown |
|                 |            |      |                                 |                                  | Culmen | 180 | 248  | 211.3  | 17.8   | 24   | 236  | Unknown |
|                 |            |      |                                 |                                  | Tarsus | 144 | 171  | 156.2  | 8.9    | 11   | 236  | Unknown |
|                 |            |      |                                 |                                  | Tail   | 310 | 374  | 345.3  | 18.1   | 24   | 236  | Yes     |
|                 |            |      |                                 |                                  | Mass   | 214 | 574  | 460.1  | 80.5   | 777  | 1360 | Unknown |
|                 | Burhinidae | 274  | Water Thick-knee                | <i>Burhinus vermiculatus</i>     | Wing   | 179 | 247  | 230.5  | 27.8   | 666  | 1360 | Unknown |
|                 |            |      |                                 |                                  | Head   | 71  | 119  | 87.2   | 9.4    | 185  | 1360 | Unknown |
|                 |            |      |                                 |                                  | Culmen | 31  | 72   | 40.6   | 12.1   | 264  | 1360 | Unknown |
|                 |            |      |                                 |                                  | Tarsus | 53  | 113  | 98.6   | 12.7   | 195  | 1360 | Unknown |
|                 |            | 274  | Water Thick-knee                | <i>Burhinus vermiculatus</i>     | Tail   | 95  | 148  | 123.8  | 17.8   | 275  | 1360 | Unknown |
|                 |            |      |                                 |                                  | Mass   | 258 | 397  | 332.5  | 39.3   | 187  | 308  | Unknown |
|                 |            |      |                                 |                                  | Wing   | 196 | 225  | 211.2  | 13.2   | 151  | 308  | Unknown |

|              |                             |                                 |        |     |     |       |      |      |      |         |
|--------------|-----------------------------|---------------------------------|--------|-----|-----|-------|------|------|------|---------|
| Charadriidae | 247 African Wattled Lapwing | <i>Vanellus senegallus</i>      | Head   | 86  | 92  | 89.9  | 2.2  | 13   | 308  | Unknown |
|              |                             |                                 | Culmen | 39  | 74  | 47.1  | 11.9 | 17   | 308  | Unknown |
|              |                             |                                 | Tarsus | 76  | 83  | 79.7  | 2.1  | 14   | 308  | Unknown |
|              |                             |                                 | Tail   | 101 | 131 | 112.5 | 8.8  | 15   | 308  | Unknown |
|              |                             |                                 | Mass   | 140 | 293 | 245.2 | 35.7 | 163  | 431  | No      |
|              |                             |                                 | Wing   | 221 | 253 | 237.5 | 8.3  | 97   | 431  | No      |
|              |                             |                                 | Head   | 69  | 98  | 74.2  | 6.8  | 44   | 431  | Unknown |
|              |                             |                                 | Culmen | 31  | 61  | 37    | 9.2  | 63   | 431  | Unknown |
|              |                             |                                 | Tarsus | 81  | 95  | 87    | 8.8  | 44   | 431  | Unknown |
|              |                             |                                 | Tail   | 87  | 112 | 100.8 | 7.3  | 53   | 431  | Unknown |
|              | 243 Black-winged Lapwing    | <i>Vanellus melanopterus</i>    | Mass   | 154 | 203 | 181.8 | 14.3 | 55   | 191  | Unknown |
|              |                             |                                 | Wing   | 196 | 222 | 211.3 | 7.3  | 34   | 191  | Unknown |
|              |                             |                                 | Head   | 62  | 62  | 61.9  | NA   | 1    | 191  | Unknown |
|              |                             |                                 | Culmen | 23  | 29  | 26.3  | 1.4  | 17   | 191  | Unknown |
|              |                             |                                 | Tarsus | 58  | 64  | 60.6  | 2.2  | 14   | 191  | Unknown |
|              | 245 Blacksmith Lapwing      | <i>Vanellus armatus</i>         | Tail   | 67  | 77  | 72.1  | 3.4  | 14   | 191  | Unknown |
|              |                             |                                 | Head   | 60  | 68  | 64.5  | 3.4  | 605  | 4660 | Unknown |
|              |                             |                                 | Culmen | 24  | 39  | 30.5  | 7.7  | 607  | 4660 | Unknown |
|              |                             |                                 | Tarsus | 65  | 82  | 74.5  | 4.6  | 461  | 4660 | Unknown |
|              |                             |                                 | Tail   | 69  | 100 | 87.9  | 9.5  | 560  | 4660 | No      |
|              | 240 Caspian Plover          | <i>Charadrius asiaticus</i>     | Mass   | 125 | 201 | 163.8 | 20.4 | 2266 | 4660 | Yes     |
|              |                             |                                 | Wing   | 155 | 225 | 208.9 | 21.3 | 1580 | 4660 | Yes     |
|              |                             |                                 | Mass   | 67  | 108 | 80.2  | 14   | 11   | 72   | Unknown |
|              |                             |                                 | Wing   | 144 | 147 | 146   | 1.4  | 4    | 72   | Unknown |
|              |                             |                                 | Tarsus | 41  | 41  | 41.2  | 0.3  | 3    | 72   | Unknown |
|              | 236 Chestnut-banded Plover  | <i>Charadrius pallidus</i>      | Tail   | 56  | 58  | 57    | 1.4  | 2    | 72   | Unknown |
|              |                             |                                 | Tarsus | 28  | 30  | 28.7  | 0.8  | 9    | 755  | Unknown |
|              |                             |                                 | Mass   | 28  | 50  | 37.8  | 5.2  | 121  | 755  | No      |
|              |                             |                                 | Wing   | 98  | 116 | 104   | 7    | 64   | 755  | No      |
|              |                             |                                 | Head   | 39  | 41  | 39.7  | 0.7  | 21   | 755  | Unknown |
|              | 233 Common Ringed Plover    | <i>Charadrius hiaticula</i>     | Culmen | 13  | 17  | 14.5  | 1.3  | 15   | 755  | Unknown |
|              |                             |                                 | Tail   | 40  | 43  | 42.1  | 1.4  | 8    | 755  | Unknown |
|              |                             |                                 | Mass   | 43  | 66  | 52.2  | 5.5  | 229  | 745  | Unknown |
|              |                             |                                 | Wing   | 122 | 133 | 128.5 | 4.4  | 71   | 745  | Unknown |
|              |                             |                                 | Head   | 39  | 41  | 40.4  | 0.6  | 21   | 745  | Unknown |
|              | 242 Crowned Lapwing         | <i>Vanellus coronatus</i>       | Culmen | 12  | 19  | 14.2  | 1.9  | 22   | 745  | Unknown |
|              |                             |                                 | Tarsus | 25  | 30  | 26.7  | 1.7  | 19   | 745  | Unknown |
|              |                             |                                 | Tail   | 47  | 62  | 56.2  | 5.3  | 8    | 745  | Unknown |
|              |                             |                                 | Mass   | 51  | 215 | 173   | 35.1 | 873  | 2166 | No      |
|              |                             |                                 | Wing   | 156 | 216 | 200.1 | 16   | 682  | 2166 | Yes     |
|              | 239 Greater Sand Plover     | <i>Charadrius leschenaultii</i> | Head   | 54  | 70  | 64.9  | 5.3  | 250  | 2166 | Unknown |
|              |                             |                                 | Culmen | 27  | 40  | 32.8  | 6.2  | 255  | 2166 | Unknown |
|              |                             |                                 | Tarsus | 61  | 78  | 69.6  | 5.2  | 229  | 2166 | Unknown |
|              |                             |                                 | Tail   | 49  | 103 | 90    | 11.1 | 271  | 2166 | Unknown |
|              |                             |                                 | Mass   | 75  | 125 | 94    | 19.7 | 23   | 96   | Unknown |

|             |                           |                                 |        |     |     |       |      |      |      |         |
|-------------|---------------------------|---------------------------------|--------|-----|-----|-------|------|------|------|---------|
|             | 241 Grey Plover           | <i>Pluvialis squatarola</i>     | Mass   | 154 | 315 | 239.7 | 44.4 | 90   | 534  | Unknown |
|             |                           |                                 | Wing   | 192 | 204 | 197.8 | 4.5  | 8    | 534  | Unknown |
|             |                           |                                 | Head   | 68  | 68  | 67.7  | NA   | 1    | 534  | Unknown |
|             | 2002 Kentish Plover       | <i>Charadrius alexandrinus</i>  | Mass   | 36  | 60  | 44.5  | 8.6  | 10   | 12   | Unknown |
|             |                           |                                 | Wing   | 105 | 127 | 111.6 | 7.8  | 10   | 12   | Unknown |
|             |                           |                                 | Head   | 41  | 46  | 42.7  | 1.6  | 9    | 12   | Unknown |
|             |                           |                                 | Culmen | 15  | 17  | 15.7  | 0.9  | 9    | 12   | Unknown |
|             |                           |                                 | Tarsus | 28  | 33  | 29.7  | 1.8  | 9    | 12   | Unknown |
|             |                           |                                 | Tail   | 44  | 44  | 44    | 0    | 2    | 12   | Unknown |
|             | 237 Kittlitz's Plover     | <i>Charadrius pecuarius</i>     | Head   | 39  | 43  | 41    | 1    | 854  | 9468 | Unknown |
|             |                           |                                 | Culmen | 15  | 21  | 16.7  | 2.1  | 826  | 9468 | Unknown |
|             |                           |                                 | Tarsus | 29  | 34  | 31.7  | 1.7  | 781  | 9468 | Unknown |
|             |                           |                                 | Tail   | 30  | 51  | 44.2  | 6.6  | 435  | 9468 | Unknown |
|             |                           |                                 | Mass   | 29  | 45  | 35.1  | 3.7  | 3798 | 9468 | Yes     |
|             |                           |                                 | Wing   | 98  | 112 | 104.6 | 3.7  | 2648 | 9468 | No      |
|             | 248 Long-toed Lapwing     | <i>Vanellus crassirostris</i>   | Mass   | 168 | 210 | 190.4 | 18.4 | 7    | 59   | Unknown |
|             |                           |                                 | Wing   | 203 | 211 | 205.8 | 3.6  | 4    | 59   | Unknown |
|             | 244 Senegal Lapwing       | <i>Vanellus lugubris</i>        | Mass   | 109 | 140 | 124.3 | 8.2  | 46   | 106  | Unknown |
|             |                           |                                 | Wing   | 177 | 193 | 183.9 | 4.9  | 30   | 106  | Unknown |
|             | 238 Three-banded Plover   | <i>Charadrius tricollaris</i>   | Tarsus | 23  | 28  | 25.3  | 1.3  | 513  | 5927 | Unknown |
|             |                           |                                 | Mass   | 28  | 41  | 33    | 4.1  | 3741 | 5927 | Yes     |
|             |                           |                                 | Wing   | 104 | 117 | 110.3 | 5.9  | 2552 | 5927 | Yes     |
|             |                           |                                 | Head   | 36  | 45  | 38.9  | 3.6  | 360  | 5927 | Unknown |
|             |                           |                                 | Culmen | 14  | 21  | 16.4  | 2.2  | 615  | 5927 | Unknown |
|             |                           |                                 | Tail   | 52  | 71  | 63    | 5.6  | 628  | 5927 | Unknown |
|             | 246 White-crowned Lapwing | <i>Vanellus albiceps</i>        | Mass   | 164 | 213 | 193.7 | 14.9 | 24   | 62   | Unknown |
|             |                           |                                 | Wing   | 206 | 220 | 212.6 | 5.9  | 7    | 62   | Unknown |
|             |                           |                                 | Culmen | 32  | 34  | 32.9  | 1    | 4    | 62   | Unknown |
|             |                           |                                 | Tarsus | 73  | 73  | 73    | NA   | 1    | 62   | Unknown |
|             |                           |                                 | Tail   | 107 | 107 | 107   | NA   | 1    | 62   | Unknown |
|             | 235 White-fronted Plover  | <i>Charadrius marginatus</i>    | Mass   | 32  | 55  | 45.6  | 5.5  | 892  | 4203 | Yes     |
|             |                           |                                 | Wing   | 96  | 116 | 108.2 | 5    | 321  | 4203 | No      |
|             |                           |                                 | Head   | 40  | 46  | 43.2  | 1.5  | 68   | 4203 | Unknown |
|             |                           |                                 | Culmen | 14  | 22  | 16.6  | 1.9  | 143  | 4203 | Unknown |
|             |                           |                                 | Tarsus | 24  | 30  | 26.8  | 1.5  | 129  | 4203 | Unknown |
|             |                           |                                 | Tail   | 40  | 55  | 47.8  | 4.3  | 93   | 4203 | Yes     |
| Dromadidae  | 273 Crab-plover           | <i>Dromas ardeola</i>           | Mass   | 264 | 328 | 286.4 | 15.8 | 36   | 77   | Unknown |
|             |                           |                                 | Wing   | 202 | 220 | 211.1 | 5.2  | 36   | 77   | Unknown |
|             |                           |                                 | Culmen | 54  | 62  | 57.5  | 2.4  | 36   | 77   | Unknown |
|             |                           |                                 | Tarsus | 94  | 95  | 95    | 0.8  | 2    | 77   | Unknown |
|             |                           |                                 | Tail   | 90  | 101 | 95.2  | 3.1  | 33   | 77   | Unknown |
| Glareolidae | 280 Bronze-winged Courser | <i>Rhinoptilus chalcopterus</i> | Mass   | 121 | 179 | 150.2 | 14.3 | 233  | 366  | Unknown |
|             |                           |                                 | Wing   | 125 | 188 | 175.3 | 19   | 185  | 366  | Unknown |
|             |                           |                                 | Head   | 20  | 70  | 54.7  | 12.3 | 64   | 366  | Unknown |
|             |                           |                                 | Culmen | 20  | 79  | 30.3  | 15.6 | 62   | 366  | Unknown |

|                |                           |                                |        |     |     |       |       |     |      |         |
|----------------|---------------------------|--------------------------------|--------|-----|-----|-------|-------|-----|------|---------|
|                | 276 Burchell's Courser    | <i>Cursorius rufus</i>         | Tarsus | 70  | 83  | 76.1  | 4     | 38  | 366  | Unknown |
|                |                           |                                | Tail   | 72  | 91  | 82.5  | 4.9   | 74  | 366  | Unknown |
|                |                           |                                | Mass   | 46  | 136 | 89.9  | 32.8  | 13  | 40   | Unknown |
|                |                           |                                | Wing   | 76  | 137 | 110.8 | 25.9  | 13  | 40   | Unknown |
|                |                           |                                | Head   | 49  | 52  | 51    | 1.1   | 6   | 40   | Unknown |
|                |                           |                                | Culmen | 27  | 33  | 29    | 2.4   | 5   | 40   | Unknown |
|                |                           |                                | Tarsus | 45  | 48  | 46.4  | 1.4   | 5   | 40   | Unknown |
|                |                           |                                | Tail   | 49  | 56  | 51    | 2.7   | 6   | 40   | Unknown |
|                |                           |                                | Mass   | 62  | 99  | 80.7  | 10.2  | 156 | 506  | No      |
|                |                           |                                | Wing   | 175 | 202 | 188.9 | 7.9   | 117 | 506  | Unknown |
|                | 281 Collared Pratincole   | <i>Glareola pratincola</i>     | Head   | 44  | 48  | 46.1  | 1.3   | 16  | 506  | Unknown |
|                |                           |                                | Culmen | 14  | 24  | 18.6  | 3.6   | 21  | 506  | Unknown |
|                |                           |                                | Tarsus | 31  | 34  | 32.9  | 1.2   | 9   | 506  | Unknown |
|                |                           |                                | Tail   | 86  | 125 | 110.1 | 11.7  | 21  | 506  | Unknown |
|                |                           |                                | Mass   | 80  | 130 | 97.7  | 13.9  | 81  | 203  | Unknown |
|                |                           |                                | Wing   | 138 | 159 | 150.1 | 8.1   | 68  | 203  | Unknown |
|                |                           |                                | Head   | 43  | 46  | 45.2  | 1     | 13  | 203  | Unknown |
|                |                           |                                | Culmen | 12  | 19  | 14.9  | 2.4   | 25  | 203  | Unknown |
|                |                           |                                | Tarsus | 40  | 58  | 53.4  | 6.1   | 12  | 203  | Unknown |
|                |                           |                                | Tail   | 61  | 73  | 67.2  | 4     | 40  | 203  | Unknown |
|                | 277 Temminck's Courser    | <i>Cursorius temminckii</i>    | Mass   | 57  | 82  | 69.9  | 6.9   | 62  | 113  | Unknown |
|                |                           |                                | Wing   | 117 | 130 | 123.1 | 3.7   | 38  | 113  | Unknown |
|                |                           |                                | Head   | 46  | 47  | 46    | 0.4   | 5   | 113  | Unknown |
|                |                           |                                | Culmen | 19  | 24  | 21.3  | 2.2   | 10  | 113  | Unknown |
|                |                           |                                | Tail   | 45  | 52  | 48    | 2.4   | 11  | 113  | Unknown |
|                | 279 Three-banded Courser  | <i>Rhinoptilus cinctus</i>     | Mass   | 122 | 160 | 139.5 | 10.3  | 61  | 83   | Unknown |
|                |                           |                                | Wing   | 162 | 174 | 167.7 | 3.9   | 38  | 83   | Unknown |
|                |                           |                                | Head   | 52  | 54  | 53.6  | 0.7   | 12  | 83   | Unknown |
|                |                           |                                | Culmen | 20  | 24  | 22    | 1     | 13  | 83   | Unknown |
|                |                           |                                | Tarsus | 68  | 72  | 70.2  | 1.2   | 11  | 83   | Unknown |
|                |                           |                                | Tail   | 80  | 87  | 84.9  | 2.3   | 13  | 83   | Unknown |
|                |                           |                                | Mass   | 597 | 786 | 689.6 | 49.9  | 387 | 4558 | Yes     |
|                |                           |                                | Wing   | 259 | 741 | 397.6 | 191.7 | 573 | 4558 | Yes     |
|                |                           |                                | Head   | 113 | 130 | 123.7 | 5.3   | 19  | 4558 | Unknown |
|                |                           |                                | Culmen | 59  | 79  | 69.2  | 6     | 92  | 4558 | Unknown |
| Haematopodidae | 231 African Oystercatcher | <i>Haematopus moquini</i>      | Tarsus | 53  | 60  | 57    | 1.9   | 82  | 4558 | Unknown |
|                |                           |                                | Tail   | 52  | 638 | 187.5 | 191.6 | 26  | 4558 | Unknown |
|                | 228 African Jacana        | <i>Actophilornis africanus</i> | Mass   | 116 | 268 | 177.7 | 47.1  | 295 | 834  | Yes     |
|                |                           |                                | Wing   | 139 | 177 | 157.4 | 11.3  | 265 | 834  | Yes     |
|                |                           |                                | Head   | 62  | 72  | 66.4  | 3.4   | 88  | 834  | Unknown |
|                |                           |                                | Culmen | 33  | 59  | 44    | 9     | 86  | 834  | Unknown |
|                |                           |                                | Tarsus | 59  | 76  | 68.3  | 4.9   | 46  | 834  | Unknown |
|                |                           |                                | Tail   | 42  | 60  | 50.1  | 4.9   | 86  | 834  | Yes     |
|                | 229 Lesser Jacana         | <i>Microparra capensis</i>     | Mass   | 16  | 42  | 34    | 8.1   | 27  | 85   | Unknown |
|                |                           |                                | Wing   | 37  | 93  | 62.9  | 28.1  | 6   | 85   | Unknown |

|         |                          |                                 |        |      |      |        |       |       |       |         |
|---------|--------------------------|---------------------------------|--------|------|------|--------|-------|-------|-------|---------|
| Laridae | 306 African Skimmer      | <i>Rynchops flavirostris</i>    | Culmen | 40   | 43   | 41     | 1.4   | 4     | 85    | Unknown |
|         |                          |                                 | Mass   | 169  | 213  | 189.2  | 14.6  | 9     | 199   | Unknown |
|         |                          |                                 | Wing   | 346  | 367  | 356.6  | 7.5   | 8     | 199   | Unknown |
|         | 292 Antarctic Tern       | <i>Sterna vittata</i>           | Mass   | 120  | 161  | 140    | 10.2  | 2539  | 3278  | Yes     |
|         |                          |                                 | Wing   | 32   | 281  | 234.8  | 76.7  | 431   | 3278  | Unknown |
|         |                          |                                 | Head   | 71   | 80   | 75.6   | 2.2   | 760   | 3278  | Unknown |
|         |                          |                                 | Culmen | 18   | 37   | 30.2   | 7.2   | 206   | 3278  | Unknown |
|         |                          |                                 | Tarsus | 17   | 68   | 19.8   | 8.9   | 811   | 3278  | Unknown |
|         |                          |                                 | Tail   | 111  | 151  | 133.8  | 12.9  | 46    | 3278  | Unknown |
|         | 294 Arctic Tern          | <i>Sterna paradisaea</i>        | Mass   | 85   | 263  | 115.7  | 47.4  | 70    | 227   | Unknown |
|         |                          |                                 | Wing   | 33   | 277  | 229.4  | 82    | 35    | 227   | Unknown |
|         |                          |                                 | Head   | 64   | 74   | 70.1   | 3.1   | 34    | 227   | Unknown |
|         |                          |                                 | Culmen | 18   | 34   | 29.1   | 4.9   | 29    | 227   | Unknown |
|         |                          |                                 | Tarsus | 16   | 74   | 38.1   | 27.2  | 18    | 227   | Unknown |
|         |                          |                                 | Tail   | 126  | 181  | 152.3  | 18.3  | 10    | 227   | Unknown |
|         | 903 Black Tern           | <i>Chlidonias niger</i>         | Mass   | 55   | 73   | 63.7   | 4.6   | 5529  | 7426  | Yes     |
|         |                          |                                 | Tarsus | 15   | 19   | 17.1   | 0.9   | 59    | 7426  | Unknown |
|         |                          |                                 | Wing   | 192  | 222  | 209.9  | 7.6   | 453   | 7426  | Unknown |
|         |                          |                                 | Head   | 57   | 63   | 60.1   | 1.7   | 4533  | 7426  | Unknown |
|         |                          |                                 | Culmen | 25   | 34   | 27.8   | 2     | 360   | 7426  | Unknown |
|         |                          |                                 | Tail   | 76   | 90   | 83     | 4.2   | 41    | 7426  | Unknown |
|         | 303 Brown Noddy          | <i>Anous stolidus</i>           | Mass   | 147  | 203  | 175.4  | 14.6  | 96    | 551   | Unknown |
|         |                          |                                 | Wing   | 269  | 289  | 279    | 5.5   | 148   | 551   | Unknown |
|         |                          |                                 | Head   | 81   | 86   | 84.2   | 1.8   | 6     | 551   | Unknown |
|         |                          |                                 | Culmen | 40   | 51   | 46     | 3.1   | 105   | 551   | Unknown |
|         |                          |                                 | Tarsus | 26   | 26   | 26     | 0     | 4     | 551   | Unknown |
|         |                          |                                 | Tail   | 146  | 167  | 156.3  | 5.6   | 112   | 551   | Unknown |
|         | 286 Brown Skua           | <i>Stercorarius antarcticus</i> | Mass   | 1008 | 1521 | 1233.3 | 277.4 | 3     | 1693  | Unknown |
|         | 291 Common Tern          | <i>Sterna hirundo</i>           | Mass   | 108  | 150  | 128.4  | 11.2  | 12828 | 24574 | Yes     |
|         |                          |                                 | Wing   | 246  | 288  | 272    | 10.4  | 4642  | 24574 | Yes     |
|         |                          |                                 | Head   | 74   | 82   | 77.8   | 2.3   | 6346  | 24574 | Unknown |
|         |                          |                                 | Culmen | 34   | 40   | 37.1   | 1.7   | 1774  | 24574 | Unknown |
|         |                          |                                 | Tarsus | 20   | 26   | 24.1   | 13.6  | 87    | 24574 | Unknown |
|         |                          |                                 | Tail   | 22   | 168  | 137.8  | 29    | 114   | 24574 | Unknown |
|         | 300 Damara Tern          | <i>Sternula balaenarum</i>      | Mass   | 44   | 58   | 50.7   | 3.3   | 269   | 1711  | Unknown |
|         |                          |                                 | Wing   | 166  | 179  | 173.3  | 3.6   | 289   | 1711  | Unknown |
|         |                          |                                 | Head   | 59   | 64   | 61.6   | 1.3   | 23    | 1711  | Unknown |
|         |                          |                                 | Culmen | 28   | 31   | 29.8   | 0.9   | 18    | 1711  | Unknown |
|         |                          |                                 | Tarsus | 15   | 15   | 15     | NA    | 1     | 1711  | Unknown |
|         |                          |                                 | Tail   | 48   | 77   | 67.4   | 12.8  | 6     | 1711  | Unknown |
|         | 298 Greater Crested Tern | <i>Thalasseus bergii</i>        | Mass   | 286  | 454  | 382.1  | 53.1  | 457   | 21780 | Yes     |
|         |                          |                                 | Wing   | 318  | 378  | 353.7  | 16.4  | 144   | 21780 | Unknown |
|         |                          |                                 | Head   | 105  | 123  | 114.9  | 4.8   | 156   | 21780 | Unknown |
|         |                          |                                 | Culmen | 55   | 68   | 62.4   | 3.5   | 46    | 21780 | Unknown |
|         |                          |                                 | Tarsus | 33   | 33   | 32.6   | NA    | 1     | 21780 | Unknown |



|                          |                                      |        |     |      |       |       |     |       |         |
|--------------------------|--------------------------------------|--------|-----|------|-------|-------|-----|-------|---------|
| 288 Grey-headed Gull     | <i>Chroicocephalus cirrocephalus</i> | Tail   | 98  | 178  | 130.3 | 35.1  | 6   | 21780 | Unknown |
|                          |                                      | Head   | 79  | 91   | 85.9  | 4.2   | 14  | 3873  | Unknown |
|                          |                                      | Culmen | 29  | 49   | 35.8  | 4.8   | 37  | 3873  | Unknown |
|                          |                                      | Tarsus | 46  | 51   | 48.5  | 1.7   | 15  | 3873  | Unknown |
|                          |                                      | Tail   | 105 | 120  | 113.1 | 5     | 29  | 3873  | Unknown |
|                          |                                      | Mass   | 217 | 422  | 292.9 | 49.2  | 52  | 3873  | Unknown |
|                          |                                      | Wing   | 272 | 317  | 298.2 | 13.6  | 45  | 3873  | Unknown |
| 289 Hartlaub's Gull      | <i>Chroicocephalus hartlaubii</i>    | Wing   | 255 | 305  | 284.8 | 12.7  | 351 | 8972  | Unknown |
|                          |                                      | Culmen | 31  | 41   | 34.4  | 3.4   | 36  | 8972  | Unknown |
|                          |                                      | Tarsus | 40  | 49   | 45.7  | 2.7   | 35  | 8972  | Unknown |
|                          |                                      | Tail   | 102 | 114  | 106.7 | 6.4   | 3   | 8972  | Unknown |
|                          |                                      | Mass   | 0   | 396  | 263.9 | 108.2 | 436 | 8972  | Unknown |
|                          |                                      | Head   | 64  | 86   | 79.4  | 5.2   | 36  | 8972  | Unknown |
|                          |                                      | Mass   | 1   | 1171 | 835.5 | 295.9 | 238 | 18164 | Unknown |
| 287 Kelp Gull            | <i>Larus dominicanus</i>             | Wing   | 392 | 438  | 414.6 | 13.4  | 283 | 18164 | Unknown |
|                          |                                      | Head   | 111 | 128  | 120.3 | 5.4   | 40  | 18164 | Unknown |
|                          |                                      | Culmen | 47  | 73   | 55.7  | 6.8   | 75  | 18164 | Unknown |
|                          |                                      | Tarsus | 64  | 87   | 75.4  | 7.4   | 56  | 18164 | Unknown |
|                          |                                      | Tail   | 91  | 170  | 151.6 | 17.5  | 41  | 18164 | Unknown |
|                          |                                      | Mass   | 216 | 282  | 245.8 | 20.6  | 20  | 25    | Unknown |
|                          |                                      | Wing   | 308 | 326  | 317.2 | 6.5   | 20  | 25    | Unknown |
| 297 Lesser Crested Tern  | <i>Thalasseus bengalensis</i>        | Culmen | 56  | 63   | 59    | 2.2   | 19  | 25    | Unknown |
|                          |                                      | Mass   | 73  | 109  | 92.7  | 8.6   | 851 | 3034  | Unknown |
|                          |                                      | Wing   | 210 | 230  | 220.5 | 5.1   | 973 | 3034  | Unknown |
|                          |                                      | Head   | 74  | 84   | 80.3  | 2.6   | 152 | 3034  | Unknown |
|                          |                                      | Culmen | 41  | 52   | 47.2  | 3     | 680 | 3034  | Unknown |
|                          |                                      | Tarsus | 21  | 24   | 21.9  | 0.9   | 112 | 3034  | Unknown |
|                          |                                      | Tail   | 106 | 122  | 114.2 | 4     | 837 | 3034  | Unknown |
| 299 Little Tern          | <i>Sternula albifrons</i>            | Mass   | 44  | 56   | 49.5  | 3.5   | 36  | 239   | Unknown |
|                          |                                      | Wing   | 167 | 180  | 175   | 4.2   | 22  | 239   | Unknown |
| 293 Roseate Tern         | <i>Sterna dougallii</i>              | Mass   | 105 | 156  | 124.5 | 12.2  | 857 | 2364  | Yes     |
|                          |                                      | Wing   | 202 | 241  | 230   | 9.5   | 336 | 2364  | No      |
|                          |                                      | Head   | 74  | 84   | 79.5  | 2.8   | 448 | 2364  | Unknown |
|                          |                                      | Culmen | 37  | 45   | 41.1  | 2.3   | 92  | 2364  | Unknown |
|                          |                                      | Tail   | 151 | 199  | 173.9 | 14.1  | 63  | 2364  | Unknown |
|                          |                                      | Mass   | 170 | 268  | 216.4 | 23    | 505 | 1051  | Yes     |
|                          |                                      | Wing   | 262 | 314  | 293.8 | 13.8  | 101 | 1051  | Unknown |
| 296 Sandwich Tern        | <i>Thalasseus sandvicensis</i>       | Head   | 96  | 110  | 102.4 | 4.2   | 269 | 1051  | Unknown |
|                          |                                      | Culmen | 48  | 58   | 53.6  | 2.6   | 71  | 1051  | Unknown |
|                          |                                      | Tarsus | 26  | 30   | 29.2  | 2.1   | 4   | 1051  | Unknown |
|                          |                                      | Tail   | 132 | 132  | 132   | NA    | 1   | 1051  | Unknown |
|                          |                                      | Mass   | 220 | 302  | 252.6 | 37    | 5   | 326   | Unknown |
|                          |                                      | Wing   | 288 | 312  | 302   | 8.2   | 8   | 326   | Unknown |
|                          |                                      | Head   | 78  | 98   | 87.8  | 7.6   | 8   | 326   | Unknown |
| 1078 Slender-billed Gull | <i>Chroicocephalus genei</i>         | Culmen | 31  | 40   | 35.2  | 4     | 4   | 326   | Unknown |

|                  |                           |                                |                              |                               |        |       |       |       |         |         |         |         |
|------------------|---------------------------|--------------------------------|------------------------------|-------------------------------|--------|-------|-------|-------|---------|---------|---------|---------|
| Pteroclididae    | 295 Sooty Tern            | <i>Onychoprion fuscatus</i>    | Tarsus                       | 45                            | 46     | 45.5  | 0.9   | 3     | 326     | Unknown |         |         |
|                  |                           |                                | Tail                         | 104                           | 110    | 106   | 3.5   | 3     | 326     | Unknown |         |         |
|                  |                           |                                | Mass                         | 187                           | 216    | 202.1 | 15.6  | 4     | 531     | Unknown |         |         |
|                  |                           |                                | Wing                         | 295                           | 307    | 298.7 | 4.3   | 13    | 531     | Unknown |         |         |
|                  |                           |                                | Culmen                       | 44                            | 50     | 46.7  | 2.3   | 11    | 531     | Unknown |         |         |
|                  | 305 Whiskered Tern        | <i>Chlidonias hybrida</i>      | Tail                         | 158                           | 204    | 177.5 | 14.5  | 10    | 531     | Unknown |         |         |
|                  |                           |                                | Mass                         | 48                            | 166    | 71.8  | 38.6  | 17    | 166     | Unknown |         |         |
|                  |                           |                                | Wing                         | 38                            | 239    | 167.3 | 120.7 | 3     | 166     | Unknown |         |         |
|                  | 304 White-winged Tern     | <i>Chlidonias leucopterus</i>  | Tarsus                       | 61                            | 61     | 61    | NA    | 1     | 166     | Unknown |         |         |
|                  |                           |                                | Mass                         | 56                            | 81     | 65.8  | 6.6   | 139   | 423     | Unknown |         |         |
|                  | 308 Burchell's Sandgrouse | <i>Pterocles burchelli</i>     | Wing                         | 191                           | 221    | 207   | 7.9   | 50    | 423     | Unknown |         |         |
|                  |                           |                                | Mass                         | 164                           | 229    | 196.9 | 17.8  | 312   | 479     | No      |         |         |
|                  |                           |                                | Wing                         | 155                           | 172    | 163.6 | 5     | 142   | 479     | No      |         |         |
|                  |                           |                                | Head                         | 40                            | 46     | 42.4  | 1.6   | 17    | 479     | Unknown |         |         |
|                  |                           |                                | Culmen                       | 11                            | 37     | 17    | 8.8   | 12    | 479     | Unknown |         |         |
|                  |                           |                                | Tarsus                       | 30                            | 32     | 31.3  | 0.9   | 4     | 479     | Unknown |         |         |
|                  |                           |                                | Tail                         | 61                            | 91     | 71.6  | 7.3   | 64    | 479     | Yes     |         |         |
|                  |                           |                                | 310 Double-banded Sandgrouse | <i>Pterocles bicinctus</i>    | Mass   | 164   | 255   | 213.7 | 23.5    | 661     | 976     | No      |
|                  |                           |                                |                              |                               | Wing   | 160   | 186   | 173.7 | 7.6     | 591     | 976     | Yes     |
|                  |                           |                                |                              |                               | Head   | 42    | 48    | 45.5  | 5.2     | 139     | 976     | Unknown |
|                  |                           |                                |                              |                               | Culmen | 14    | 21    | 17.9  | 2.2     | 133     | 976     | Unknown |
|                  |                           |                                |                              |                               | Tarsus | 24    | 31    | 27.6  | 1.8     | 78      | 976     | Unknown |
|                  |                           |                                | 307 Namaqua Sandgrouse       | <i>Pterocles namaqua</i>      | Tail   | 66    | 96    | 81.4  | 10.9    | 245     | 976     | Yes     |
|                  |                           |                                |                              |                               | Mass   | 142   | 212   | 175.1 | 17.8    | 836     | 1136    | Yes     |
| Wing             |                           |                                |                              |                               | 156    | 177   | 166   | 5.5   | 681     | 1136    | Yes     |         |
| Head             |                           |                                |                              |                               | 40     | 45    | 42    | 1.4   | 83      | 1136    | Unknown |         |
| Culmen           |                           |                                |                              |                               | 10     | 20    | 13.8  | 3     | 77      | 1136    | Unknown |         |
| Recurvirostridae | 270 Black-winged Stilt    | <i>Himantopus himantopus</i>   | Tarsus                       | 20                            | 26     | 23.1  | 1.8   | 76    | 1136    | Unknown |         |         |
|                  |                           |                                | Tail                         | 68                            | 136    | 102.8 | 16.5  | 187   | 1136    | Yes     |         |         |
|                  |                           |                                | Mass                         | 55                            | 232    | 174.2 | 43.4  | 36    | 227     | Unknown |         |         |
|                  |                           |                                | Wing                         | 52                            | 246    | 204   | 62.2  | 15    | 227     | Unknown |         |         |
|                  |                           |                                | Head                         | 62                            | 107    | 85.5  | 19.9  | 7     | 227     | Unknown |         |         |
|                  |                           |                                | Culmen                       | 28                            | 68     | 50.7  | 18    | 8     | 227     | Unknown |         |         |
|                  |                           |                                | Tarsus                       | 47                            | 117    | 82.6  | 28.7  | 8     | 227     | Unknown |         |         |
|                  |                           |                                | Tail                         | 18                            | 124    | 69.9  | 37.2  | 8     | 227     | Unknown |         |         |
|                  |                           |                                | 269 Pied Avocet              | <i>Recurvirostra avosetta</i> | Mass   | 222   | 371   | 309.3 | 35.7    | 135     | 302     | Unknown |
|                  |                           |                                |                              |                               | Wing   | 129   | 232   | 215.1 | 22.7    | 41      | 302     | Unknown |
| Head             | 117                       | 127                            |                              |                               | 122.3  | 4.1   | 7     | 302   | Unknown |         |         |         |
| Culmen           | 79                        | 92                             |                              |                               | 84     | 5.1   | 12    | 302   | Unknown |         |         |         |
| Rostratulidae    | 230 Greater Painted-snipe | <i>Rostratula benghalensis</i> | Tarsus                       | 83                            | 93     | 88.2  | 3.2   | 14    | 302     | Unknown |         |         |
|                  |                           |                                | Tail                         | 75                            | 84     | 78.7  | 4.4   | 4     | 302     | Unknown |         |         |
|                  |                           |                                | Head                         | 73                            | 79     | 75.7  | 1.9   | 27    | 636     | Unknown |         |         |
|                  |                           |                                | Culmen                       | 44                            | 53     | 48.7  | 2.7   | 32    | 636     | Unknown |         |         |
|                  |                           |                                | Tarsus                       | 41                            | 49     | 45.1  | 2.4   | 15    | 636     | Unknown |         |         |
|                  |                           |                                | Tail                         | 40                            | 48     | 43.7  | 2.5   | 28    | 636     | Yes     |         |         |

|              |                       |                              |        |     |     |       |      |      |       |         |
|--------------|-----------------------|------------------------------|--------|-----|-----|-------|------|------|-------|---------|
| Scolopacidae | 250 African Snipe     | <i>Gallinago nigripennis</i> | Mass   | 100 | 158 | 122.6 | 15.3 | 124  | 636   | Yes     |
|              |                       |                              | Wing   | 120 | 143 | 132.5 | 7    | 78   | 636   | Yes     |
|              |                       |                              | Mass   | 100 | 140 | 118.1 | 11.9 | 546  | 1050  | Yes     |
|              |                       |                              | Wing   | 121 | 142 | 131.8 | 5.8  | 249  | 1050  | Unknown |
|              |                       |                              | Head   | 59  | 117 | 103.6 | 12.7 | 76   | 1050  | Unknown |
|              |                       |                              | Culmen | 39  | 87  | 74.3  | 10.1 | 77   | 1050  | Unknown |
|              |                       |                              | Tarsus | 31  | 108 | 41.2  | 16.9 | 54   | 1050  | Unknown |
|              |                       |                              | Tail   | 49  | 77  | 60.4  | 7.1  | 70   | 1050  | Unknown |
|              | 266 Bar-tailed Godwit | <i>Limosa lapponica</i>      | Mass   | 181 | 411 | 306.7 | 67.5 | 24   | 61    | Unknown |
|              |                       |                              | Wing   | 204 | 228 | 216.2 | 7.5  | 13   | 61    | Unknown |
|              | 263 Common Greenshank | <i>Tringa nebularia</i>      | Mass   | 56  | 271 | 174.3 | 47.1 | 172  | 799   | Unknown |
|              |                       |                              | Wing   | 167 | 195 | 184.8 | 8.8  | 12   | 799   | Unknown |
|              |                       |                              | Head   | 61  | 94  | 72.4  | 14.2 | 13   | 799   | Unknown |
|              |                       |                              | Culmen | 57  | 84  | 73.5  | 9.7  | 13   | 799   | Unknown |
|              |                       |                              | Tarsus | 62  | 62  | 62.3  | NA   | 1    | 799   | Unknown |
|              |                       |                              | Tail   | 84  | 280 | 178.6 | 47.5 | 27   | 799   | Unknown |
|              | 261 Common Redshank   | <i>Tringa totanus</i>        | Mass   | 105 | 128 | 116.9 | 9.2  | 7    | 53    | Unknown |
|              |                       |                              | Wing   | 155 | 166 | 160.4 | 3.3  | 18   | 53    | Unknown |
|              |                       |                              | Head   | 69  | 76  | 72.5  | 2.1  | 18   | 53    | Unknown |
|              |                       |                              | Tarsus | 43  | 52  | 47.6  | 3    | 18   | 53    | Unknown |
|              | 258 Common Sandpiper  | <i>Actitis hypoleucos</i>    | Mass   | 40  | 74  | 50.5  | 8.8  | 383  | 2110  | Unknown |
|              |                       |                              | Wing   | 71  | 117 | 108.6 | 10.2 | 174  | 2110  | Unknown |
|              |                       |                              | Head   | 47  | 52  | 49.7  | 1.3  | 49   | 2110  | Unknown |
|              |                       |                              | Culmen | 22  | 31  | 27    | 4.7  | 57   | 2110  | Unknown |
|              |                       |                              | Tarsus | 23  | 30  | 26    | 2.6  | 35   | 2110  | Unknown |
|              |                       |                              | Tail   | 50  | 61  | 55.7  | 3.9  | 43   | 2110  | Unknown |
|              | 251 Curlew Sandpiper  | <i>Calidris ferruginea</i>   | Mass   | 46  | 78  | 57.6  | 7.6  | 2528 | 21723 | Yes     |
|              |                       |                              | Wing   | 120 | 137 | 129.3 | 4.2  | 258  | 21723 | No      |
|              |                       |                              | Head   | 59  | 65  | 61.4  | 1.8  | 72   | 21723 | Unknown |
|              |                       |                              | Culmen | 34  | 43  | 37.7  | 2.4  | 71   | 21723 | Unknown |
|              |                       |                              | Tarsus | 29  | 32  | 30.5  | 0.9  | 38   | 21723 | Unknown |
|              |                       |                              | Tail   | 44  | 55  | 48.7  | 3.2  | 21   | 21723 | Unknown |
|              | 896 Dunlin            | <i>Calidris alpina</i>       | Mass   | 39  | 63  | 50.8  | 7.4  | 17   | 30    | Unknown |
|              |                       |                              | Wing   | 110 | 127 | 117.9 | 4.6  | 17   | 30    | Unknown |
|              |                       |                              | Head   | 53  | 62  | 57.4  | 2.8  | 16   | 30    | Unknown |
|              |                       |                              | Culmen | 29  | 36  | 32.1  | 2.3  | 15   | 30    | Unknown |
|              |                       |                              | Tarsus | 24  | 31  | 27    | 1.8  | 16   | 30    | Unknown |
|              |                       |                              | Tail   | 43  | 49  | 46.6  | 1.9  | 11   | 30    | Unknown |
|              | 259 Green Sandpiper   | <i>Tringa ochropus</i>       | Mass   | 34  | 35  | 34.3  | 0.8  | 3    | 37    | Unknown |
|              |                       |                              | Wing   | 35  | 36  | 35.5  | 0.6  | 4    | 37    | Unknown |
|              |                       |                              | Head   | 58  | 59  | 58.5  | 0.7  | 2    | 37    | Unknown |
|              |                       |                              | Culmen | 75  | 103 | 85.5  | 12.3 | 5    | 37    | Unknown |
|              | 253 Little Stint      | <i>Calidris minuta</i>       | Wing   | 91  | 103 | 97.3  | 3.4  | 3110 | 13549 | Yes     |
|              |                       |                              | Mass   | 19  | 31  | 23.7  | 6    | 5437 | 13549 | Yes     |
|              |                       |                              | Head   | 37  | 41  | 38.8  | 1.2  | 618  | 13549 | Unknown |

|               |                                                           |                                                                             |                            |        |     |      |        |       |      |       |         |
|---------------|-----------------------------------------------------------|-----------------------------------------------------------------------------|----------------------------|--------|-----|------|--------|-------|------|-------|---------|
| Ciconiiformes | Anhingidae                                                | 262 Marsh Sandpiper                                                         | <i>Tringa stagnatilis</i>  | Culmen | 16  | 20   | 18.4   | 1.1   | 3111 | 13549 | Unknown |
|               |                                                           |                                                                             |                            | Tarsus | 20  | 24   | 21.8   | 0.9   | 479  | 13549 | Unknown |
|               |                                                           |                                                                             |                            | Tail   | 21  | 47   | 36.6   | 8.8   | 352  | 13549 | Unknown |
|               |                                                           |                                                                             |                            | Mass   | 39  | 75   | 51.4   | 13.3  | 200  | 637   | Unknown |
|               |                                                           |                                                                             |                            | Wing   | 50  | 142  | 71.9   | 34.5  | 48   | 637   | Unknown |
|               |                                                           |                                                                             |                            | Head   | 57  | 69   | 61.9   | 3.3   | 41   | 637   | Unknown |
|               |                                                           |                                                                             |                            | Culmen | 56  | 81   | 69.4   | 6.3   | 143  | 637   | Unknown |
|               |                                                           |                                                                             |                            | Tarsus | 52  | 52   | 52.3   | NA    | 1    | 637   | Unknown |
|               |                                                           | 254 Red Knot                                                                | <i>Calidris canutus</i>    | Tail   | 55  | 58   | 56.4   | 1.5   | 3    | 637   | Unknown |
|               |                                                           |                                                                             |                            | Mass   | 118 | 205  | 149    | 25.7  | 473  | 2572  | Unknown |
|               |                                                           |                                                                             |                            | Wing   | 166 | 178  | 171.3  | 4.4   | 12   | 2572  | Unknown |
|               |                                                           |                                                                             |                            | Culmen | 34  | 37   | 35.3   | 1.2   | 10   | 2572  | Unknown |
|               |                                                           | 232 Ruddy Turnstone                                                         | <i>Arenaria interpres</i>  | Tarsus | 32  | 34   | 33.2   | 0.6   | 6    | 2572  | Unknown |
|               |                                                           |                                                                             |                            | Mass   | 85  | 170  | 118.7  | 25.4  | 468  | 916   | No      |
|               |                                                           |                                                                             |                            | Wing   | 148 | 162  | 154.7  | 3.9   | 149  | 916   | Unknown |
|               |                                                           |                                                                             |                            | Head   | 48  | 52   | 49.6   | 1.1   | 44   | 916   | Unknown |
|               |                                                           |                                                                             |                            | Culmen | 20  | 24   | 22.1   | 1.3   | 8    | 916   | Unknown |
|               |                                                           |                                                                             |                            | Tarsus | 25  | 25   | 25.1   | 0.6   | 2    | 916   | Unknown |
|               | 256 Ruff                                                  | <i>Calidris pugnax</i>                                                      |                            | Tail   | 54  | 62   | 57.4   | 3.8   | 5    | 916   | Unknown |
|               |                                                           |                                                                             |                            | Mass   | 86  | 168  | 106.9  | 19.4  | 1162 | 5107  | Yes     |
|               |                                                           |                                                                             |                            | Wing   | 145 | 183  | 156.9  | 7.8   | 264  | 5107  | Yes     |
|               |                                                           |                                                                             |                            | Head   | 49  | 68   | 61     | 4.8   | 112  | 5107  | Unknown |
|               |                                                           |                                                                             |                            | Culmen | 28  | 54   | 33.8   | 5.6   | 106  | 5107  | Unknown |
|               |                                                           |                                                                             |                            | Tarsus | 39  | 52   | 43.4   | 3.4   | 62   | 5107  | Unknown |
|               |                                                           |                                                                             |                            | Tail   | 42  | 70   | 56.6   | 6.1   | 91   | 5107  | Unknown |
|               |                                                           | 255 Sanderling                                                              | <i>Calidris alba</i>       | Mass   | 48  | 79   | 59.5   | 8.3   | 443  | 2842  | Unknown |
|               |                                                           |                                                                             |                            | Wing   | 95  | 130  | 121.2  | 8.2   | 28   | 2842  | Unknown |
|               |                                                           |                                                                             |                            | Head   | 45  | 54   | 50.6   | 2.7   | 19   | 2842  | Unknown |
|               |                                                           |                                                                             |                            | Culmen | 22  | 29   | 25.6   | 2.1   | 27   | 2842  | Unknown |
|               |                                                           |                                                                             |                            | Tarsus | 24  | 27   | 25.5   | 1.1   | 22   | 2842  | Unknown |
|               |                                                           |                                                                             |                            | Tail   | 43  | 43   | 43     | NA    | 1    | 2842  | Unknown |
|               | 257 Terek Sandpiper<br>268 Whimbrel<br>264 Wood Sandpiper | <i>Xenus cinereus</i><br><i>Numenius phaeopus</i><br><i>Tringa glareola</i> |                            | Mass   | 64  | 118  | 82.1   | 15.2  | 63   | 428   | Unknown |
|               |                                                           |                                                                             |                            | Mass   | 447 | 590  | 518.4  | 65.6  | 5    | 138   | Unknown |
|               |                                                           |                                                                             |                            | Mass   | 50  | 78   | 60.8   | 6.8   | 1019 | 4286  | Unknown |
|               |                                                           |                                                                             |                            | Wing   | 117 | 132  | 125.8  | 3.8   | 525  | 4286  | Unknown |
|               |                                                           |                                                                             |                            | Head   | 53  | 58   | 55.5   | 1.5   | 135  | 4286  | Unknown |
|               |                                                           |                                                                             |                            | Culmen | 26  | 34   | 29.7   | 2.2   | 144  | 4286  | Unknown |
|               |                                                           |                                                                             |                            | Tarsus | 35  | 41   | 38.2   | 1.6   | 61   | 4286  | Unknown |
|               |                                                           |                                                                             |                            | Tail   | 38  | 56   | 49.3   | 4.7   | 150  | 4286  | Unknown |
| Ciconiiformes | Anhingidae                                                | 52 African Darter                                                           | <i>Anhinga rufa</i>        | Mass   | 820 | 1364 | 1086.5 | 172   | 11   | 73    | Unknown |
|               |                                                           |                                                                             |                            | Wing   | 327 | 355  | 344    | 10.3  | 7    | 73    | Unknown |
|               |                                                           |                                                                             |                            | Head   | 132 | 133  | 132.5  | 0.6   | 2    | 73    | Unknown |
|               |                                                           |                                                                             |                            | Culmen | 72  | 76   | 74.1   | 1.7   | 4    | 73    | Unknown |
|               |                                                           |                                                                             |                            | Tail   | 248 | 264  | 255.3  | 8.7   | 3    | 73    | Unknown |
|               |                                                           |                                                                             |                            | Mass   | 160 | 1582 | 1093.5 | 536.9 | 8    | 1365  | Unknown |
|               | Ardeidae                                                  | 55 Black-headed Heron                                                       | <i>Ardea melanocephala</i> |        |     |      |        |       |      |       |         |
|               |                                                           |                                                                             |                            |        |     |      |        |       |      |       |         |
|               |                                                           |                                                                             |                            |        |     |      |        |       |      |       |         |
|               |                                                           |                                                                             |                            |        |     |      |        |       |      |       |         |

|             |                             |                                 |        |      |       |        |        |     |         |         |
|-------------|-----------------------------|---------------------------------|--------|------|-------|--------|--------|-----|---------|---------|
| Ciconiidae  | 66 Dwarf Bittern            | <i>Ixobrychus sturmii</i>       | Wing   | 387  | 436   | 408.8  | 15.6   | 10  | 1365    | Unknown |
|             |                             |                                 | Mass   | 126  | 160   | 142.8  | 25.1   | 2   | 17      | Unknown |
|             | 54 Grey Heron               | <i>Ardea cinerea</i>            | Mass   | 870  | 1750  | 1334.4 | 350.9  | 9   | 547     | Unknown |
|             |                             |                                 | Wing   | 397  | 474   | 430    | 26     | 9   | 547     | Unknown |
|             |                             |                                 | Head   | 168  | 173   | 171.4  | 2.9    | 3   | 547     | Unknown |
|             |                             |                                 | Culmen | 94   | 112   | 103.2  | 13.6   | 2   | 547     | Unknown |
|             |                             |                                 | Tarsus | 134  | 152   | 143    | 12.7   | 2   | 547     | Unknown |
|             |                             |                                 | Tail   | 160  | 160   | 160    | NA     | 1   | 547     | Unknown |
|             | 67 Little Bittern           | <i>Ixobrychus minutus</i>       | Mass   | 90   | 145   | 118.6  | 16.1   | 210 | 296     | No      |
|             |                             |                                 | Wing   | 129  | 151   | 139.8  | 7.2    | 185 | 296     | Yes     |
|             |                             |                                 | Head   | 84   | 98    | 91.9   | 3.8    | 38  | 296     | Unknown |
|             |                             |                                 | Culmen | 46   | 57    | 50.3   | 3.2    | 44  | 296     | Unknown |
|             |                             |                                 | Tarsus | 42   | 91    | 49.3   | 12     | 29  | 296     | Unknown |
|             |                             |                                 | Tail   | 42   | 55    | 48.6   | 3.4    | 73  | 296     | No      |
|             | 62 Squacco Heron            | <i>Ardeola ralloides</i>        | Mass   | 140  | 285   | 223    | 48.1   | 17  | 47      | Unknown |
|             |                             |                                 | Wing   | 193  | 230   | 214    | 13.7   | 17  | 47      | Unknown |
|             |                             |                                 | Head   | 68   | 113   | 102.1  | 18.3   | 7   | 47      | Unknown |
|             |                             |                                 | Culmen | 58   | 70    | 63.3   | 4.1    | 7   | 47      | Unknown |
|             |                             |                                 | Tarsus | 55   | 58    | 56     | 1.4    | 4   | 47      | Unknown |
|             |                             |                                 | Tail   | 67   | 85    | 77.8   | 8      | 8   | 47      | Unknown |
|             | 63 Striated Heron           | <i>Butorides striata</i>        | Mass   | 154  | 246   | 203.9  | 31.5   | 71  | 116     | Unknown |
|             |                             |                                 | Wing   | 168  | 190   | 181    | 6.4    | 62  | 116     | Unknown |
|             |                             |                                 | Head   | 101  | 120   | 112.2  | 5.5    | 22  | 116     | Unknown |
|             |                             |                                 | Culmen | 56   | 72    | 66.5   | 5.3    | 23  | 116     | Unknown |
|             |                             |                                 | Tarsus | 44   | 53    | 48.4   | 2.4    | 19  | 116     | Unknown |
|             |                             |                                 | Tail   | 60   | 74    | 67.4   | 4.4    | 22  | 116     | Unknown |
|             | 61 Western Cattle Egret     | <i>Bubulcus ibis</i>            | Mass   | 240  | 441   | 345    | 52.4   | 157 | 10234   | Unknown |
|             |                             |                                 | Wing   | 225  | 264   | 243.6  | 22.2   | 151 | 10234   | Unknown |
|             |                             |                                 | Head   | 91   | 109   | 100    | 4.5    | 48  | 10234   | Unknown |
|             |                             |                                 | Culmen | 48   | 62    | 54     | 4.2    | 54  | 10234   | Unknown |
|             |                             |                                 | Tarsus | 68   | 82    | 75.9   | 4.3    | 35  | 10234   | Unknown |
|             |                             |                                 | Tail   | 84   | 105   | 93.9   | 6.7    | 28  | 10234   | Unknown |
|             | 80 White Stork              | <i>Ciconia ciconia</i>          | Mass   | 2275 | 3310  | 2785   | 1381.7 | 6   | 178     | Unknown |
| Wing        |                             |                                 | 527    | 588  | 561   | 19.2   | 11     | 178 | Unknown |         |
| Head        |                             |                                 | 45     | 257  | 195.3 | 110.8  | 4      | 178 | Unknown |         |
| Culmen      |                             |                                 | 161    | 198  | 181.7 | 15.1   | 6      | 178 | Unknown |         |
| Tarsus      |                             |                                 | 205    | 215  | 210.5 | 4.2    | 4      | 178 | Unknown |         |
| Tail        |                             |                                 | 201    | 244  | 220   | 20.4   | 5      | 178 | Unknown |         |
| Diomedeidae | 9 Grey-headed Albatross     | <i>Thalassarche chrysostoma</i> | Mass   | 1679 | 3790  | 3188   | 738.3  | 24  | 1829    | Yes     |
|             |                             |                                 | Culmen | 108  | 118   | 113.1  | 3      | 41  | 1829    | Unknown |
|             | 876 Light-mantled Albatross | <i>Phoebetria palpebrata</i>    | Mass   | 2438 | 3258  | 2922.7 | 283.4  | 11  | 141     | Unknown |
|             |                             |                                 | Culmen | 103  | 109   | 105.7  | 2.4    | 8   | 141     | Unknown |
|             | 12 Sooty Albatross          | <i>Phoebetria fusca</i>         | Mass   | 2112 | 2938  | 2506.8 | 225.2  | 165 | 1903    | Unknown |
|             |                             |                                 | Culmen | 101  | 119   | 112.1  | 4.8    | 194 | 1903    | Unknown |
|             | 1080 Tristan Albatross      | <i>Diomedea dabbenena</i>       | Culmen | 138  | 153   | 145.7  | 4.1    | 199 | 4860    | Unknown |
|             |                             |                                 |        |      |       |        |        |     |         |         |

|                   |    |                                    |                                    |        |      |      |        |        |     |       |         |
|-------------------|----|------------------------------------|------------------------------------|--------|------|------|--------|--------|-----|-------|---------|
|                   | 10 | Yellow-nosed Albatross (pre-split) | <i>Thalassarche chlororhynchos</i> | Culmen | 138  | 153  | 145.7  | 3.8    | 191 | 4860  | Unknown |
|                   |    |                                    |                                    | Mass   | 2340 | 3102 | 2558.2 | 266    | 11  | 3346  | Unknown |
|                   |    |                                    |                                    | Wing   | 490  | 508  | 496    | 7.5    | 5   | 3346  | Unknown |
| Hydrobatidae      | 38 | Common Diving Petrel               | <i>Pelecanoides urinatrix</i>      | Mass   | 134  | 153  | 144.2  | 6.8    | 33  | 70    | Unknown |
|                   | 31 | Leach's Storm Petrel               | <i>Oceanodroma leucorhoa</i>       | Mass   | 41   | 51   | 46.2   | 2.9    | 22  | 44    | Unknown |
| Pelecanidae       | 42 | Great White Pelican                | <i>Pelecanus onocrotalus</i>       | Wing   | 157  | 160  | 159.1  | 1.1    | 22  | 44    | Unknown |
|                   |    |                                    |                                    | Mass   | 4885 | 8332 | 6508.3 | 1134.5 | 18  | 1279  | Unknown |
|                   |    |                                    |                                    | Wing   | 606  | 695  | 633.3  | 27.3   | 13  | 1279  | Unknown |
| Phaethontidae     | 39 | Red-tailed Tropicbird              | <i>Phaethon rubricauda</i>         | Mass   | 552  | 844  | 734.8  | 96.5   | 32  | 780   | Unknown |
|                   | 40 | White-tailed Tropicbird            | <i>Phaethon lepturus</i>           | Mass   | 270  | 403  | 328.2  | 33.4   | 469 | 2468  | Unknown |
|                   |    |                                    |                                    | Wing   | 260  | 294  | 277.2  | 13.7   | 581 | 2468  | Unknown |
| Phalacrocoracidae | 49 | Bank Cormorant                     | <i>Phalacrocorax neglectus</i>     | Head   | 50   | 120  | 91.1   | 21.2   | 173 | 2468  | Unknown |
|                   |    |                                    |                                    | Culmen | 45   | 56   | 50.1   | 2.8    | 549 | 2468  | Unknown |
|                   |    |                                    |                                    | Tarsus | 19   | 27   | 22.8   | 2.1    | 162 | 2468  | Unknown |
|                   | 48 | Cape Cormorant                     | <i>Phalacrocorax capensis</i>      | Tail   | 104  | 489  | 280.3  | 147.5  | 526 | 2468  | Unknown |
|                   |    |                                    |                                    | Mass   | 2    | 2332 | 1717   | 615.2  | 29  | 2479  | Unknown |
|                   |    |                                    |                                    | Mass   | 806  | 1435 | 1082   | 165.7  | 93  | 12201 | Unknown |
|                   | 50 | Reed Cormorant                     | <i>Microcarbo africanus</i>        | Wing   | 250  | 267  | 258.7  | 6      | 11  | 12201 | Unknown |
|                   |    |                                    |                                    | Mass   | 371  | 619  | 473    | 69.7   | 23  | 509   | Unknown |
|                   |    |                                    |                                    | Wing   | 203  | 224  | 215    | 6.9    | 10  | 509   | Unknown |
|                   | 47 | White-breasted Cormorant           | <i>Phalacrocorax lucidus</i>       | Head   | 84   | 84   | 84.5   | NA     | 1   | 509   | Unknown |
|                   |    |                                    |                                    | Culmen | 29   | 30   | 29.5   | 0.7    | 2   | 509   | Unknown |
|                   |    |                                    |                                    | Tail   | 150  | 165  | 157.5  | 10.6   | 2   | 509   | Unknown |
|                   |    |                                    |                                    | Mass   | 1450 | 2733 | 2051.6 | 379.5  | 35  | 4548  | Unknown |
|                   |    |                                    |                                    | Wing   | 315  | 336  | 325    | 8.8    | 7   | 4548  | Unknown |
|                   |    |                                    |                                    | Head   | 141  | 164  | 152.6  | 17.5   | 2   | 4548  | Unknown |
|                   |    |                                    |                                    | Culmen | 61   | 71   | 66.4   | 5.7    | 3   | 4548  | Unknown |
| Phoenicopteridae  | 86 | Greater Flamingo                   | <i>Phoenicopterus roseus</i>       | Tarsus | 66   | 72   | 69     | 4      | 2   | 4548  | Unknown |
|                   |    |                                    |                                    | Mass   | 1630 | 3630 | 2744.2 | 522    | 41  | 816   | Unknown |
|                   |    |                                    |                                    | Wing   | 370  | 428  | 402.7  | 18.7   | 45  | 816   | Unknown |
|                   |    |                                    |                                    | Head   | 161  | 168  | 164    | 3.6    | 3   | 816   | Unknown |
|                   |    |                                    |                                    | Culmen | 121  | 124  | 123    | 1.6    | 3   | 816   | Unknown |
|                   | 87 | Lesser Flamingo                    | <i>Phoeniconaias minor</i>         | Tarsus | 276  | 363  | 314.5  | 31.7   | 7   | 816   | Unknown |
|                   |    |                                    |                                    | Tail   | 145  | 158  | 152.6  | 5.9    | 5   | 816   | Unknown |
|                   |    |                                    |                                    | Mass   | 196  | 2122 | 1131.8 | 733.8  | 63  | 153   | No      |
|                   |    |                                    |                                    | Wing   | 299  | 2000 | 685.5  | 635.2  | 64  | 153   | Yes     |
|                   |    |                                    |                                    | Culmen | 92   | 136  | 113.1  | 22.9   | 3   | 153   | Unknown |
| Podicipedidae     | 6  | Little Grebe                       | <i>Tachybaptus ruficollis</i>      | Tail   | 100  | 123  | 110    | 9.2    | 6   | 153   | Unknown |
|                   |    |                                    |                                    | Mass   | 105  | 204  | 154.8  | 27.4   | 21  | 77    | Unknown |
|                   |    |                                    |                                    | Wing   | 98   | 107  | 101.6  | 2.6    | 18  | 77    | Unknown |
|                   |    |                                    |                                    | Head   | 53   | 53   | 53.1   | NA     | 1   | 77    | Unknown |
| Procellariidae    | 28 | Audubon's Shearwater               | <i>Puffinus lherminieri</i>        | Culmen | 18   | 19   | 18.4   | 0.8    | 2   | 77    | Unknown |
|                   |    |                                    |                                    | Mass   | 73   | 186  | 148.4  | 40     | 34  | 105   | Unknown |
|                   |    |                                    |                                    | Wing   | 18   | 201  | 160.2  | 67.5   | 43  | 105   | Unknown |
|                   |    |                                    |                                    | Head   | 61   | 146  | 79.6   | 30.2   | 12  | 105   | Unknown |

|                      |                              |                                  |                             |                          |                        |                                 |       |      |         |         |         |         |
|----------------------|------------------------------|----------------------------------|-----------------------------|--------------------------|------------------------|---------------------------------|-------|------|---------|---------|---------|---------|
| Scopidae             | 20 Blue Petrel               | <i>Halobaena caerulea</i>        | Culmen                      | 25                       | 63                     | 30.3                            | 9.6   | 29   | 105     | Unknown |         |         |
|                      |                              |                                  | Tarsus                      | 35                       | 37                     | 35.6                            | 0.6   | 10   | 105     | Unknown |         |         |
|                      |                              |                                  | Tail                        | 63                       | 98                     | 77.8                            | 9.7   | 42   | 105     | Unknown |         |         |
|                      |                              |                                  | Mass                        | 206                      | 230                    | 222                             | 8.2   | 10   | 171     | Unknown |         |         |
|                      |                              |                                  | Wing                        | 209                      | 222                    | 216.5                           | 4.1   | 10   | 171     | Unknown |         |         |
|                      |                              |                                  | Head                        | 68                       | 71                     | 69.1                            | 1.1   | 10   | 171     | Unknown |         |         |
|                      | 21 Broad-billed Prion        | <i>Pachyptila vittata</i>        | Culmen                      | 26                       | 28                     | 27.1                            | 0.7   | 10   | 171     | Unknown |         |         |
|                      |                              |                                  | Tarsus                      | 33                       | 34                     | 33.5                            | 0.5   | 6    | 171     | Unknown |         |         |
|                      |                              |                                  | Mass                        | 165                      | 230                    | 195                             | 18.2  | 43   | 643     | Unknown |         |         |
|                      |                              |                                  | Wing                        | 202                      | 219                    | 208.6                           | 4.9   | 43   | 643     | Unknown |         |         |
|                      |                              |                                  | Head                        | 70                       | 75                     | 72.5                            | 1.6   | 47   | 643     | Unknown |         |         |
|                      |                              |                                  | Culmen                      | 33                       | 37                     | 34.8                            | 1     | 30   | 643     | Unknown |         |         |
|                      | 14 Cape Petrel               | <i>Daption capense</i>           | Tarsus                      | 36                       | 38                     | 37                              | 0.6   | 15   | 643     | Unknown |         |         |
|                      |                              |                                  | Mass                        | 343                      | 440                    | 391.9                           | 39.1  | 8    | 13      | Unknown |         |         |
|                      | 25 Great Shearwater          | <i>Ardenna gravis</i>            | Mass                        | 686                      | 900                    | 785.6                           | 64.7  | 27   | 836     | Unknown |         |         |
|                      |                              |                                  | Wing                        | 322                      | 976                    | 726.5                           | 244.8 | 57   | 836     | Unknown |         |         |
|                      |                              |                                  | Culmen                      | 45                       | 48                     | 46.7                            | 1.1   | 11   | 836     | Unknown |         |         |
|                      |                              |                                  | Tarsus                      | 59                       | 62                     | 60.7                            | 1     | 14   | 836     | Unknown |         |         |
|                      |                              |                                  | 984 Northern Giant Petrel   | <i>Macronectes halli</i> | Mass                   | 5                               | 31    | 16.8 | 9       | 8       | 7157    | Unknown |
|                      |                              |                                  |                             |                          | Culmen                 | 85                              | 105   | 93.5 | 6.5     | 23      | 7157    | Unknown |
|                      | 878 Salvin's Prion           | <i>Pachyptila salvini</i>        | Mass                        | 145                      | 182                    | 161.5                           | 9.8   | 37   | 1431    | Unknown |         |         |
|                      |                              |                                  | 180 Wedge-tailed Shearwater | <i>Ardenna pacifica</i>  | Mass                   | 368                             | 368   | 368  | NA      | 1       | 2018    | Unknown |
| 72 Hamerkop          |                              |                                  |                             |                          | <i>Scopus umbretta</i> | Mass                            | 269   | 524  | 453.8   | 68.4    | 24      | 70      |
|                      |                              |                                  | Wing                        | 264                      |                        | 338                             | 311.2 | 24.8 | 20      | 70      | Unknown |         |
|                      |                              |                                  | Head                        | 127                      |                        | 131                             | 128.4 | 2.2  | 3       | 70      | Unknown |         |
|                      |                              |                                  | Culmen                      | 84                       |                        | 93                              | 89.9  | 5.1  | 3       | 70      | Unknown |         |
| Spheniscidae         | 2 African Penguin            | <i>Spheniscus demersus</i>       | Tarsus                      | 75                       | 76                     | 75.5                            | 1.3   | 2    | 70      | Unknown |         |         |
|                      |                              |                                  | Tail                        | 168                      | 168                    | 168                             | NA    | 1    | 70      | Unknown |         |         |
|                      |                              |                                  | Mass                        | 2740                     | 4402                   | 3376.2                          | 606   | 24   | 1014    | Unknown |         |         |
|                      |                              |                                  | Head                        | 117                      | 131                    | 123.3                           | 4.2   | 84   | 1014    | Unknown |         |         |
|                      |                              |                                  | Culmen                      | 52                       | 62                     | 57.1                            | 2.7   | 83   | 1014    | Unknown |         |         |
|                      |                              |                                  | Mass                        | 4000                     | 5790                   | 4851                            | 547.8 | 49   | 5090    | Unknown |         |         |
| 983 Macaroni Penguin | <i>Eudyptes chrysolophus</i> | Mass                             | 2076                        | 2924                     | 2443.6                 | 241.1                           | 22    | 209  | Unknown |         |         |         |
|                      |                              | 3 Rockhopper Penguin (pre-split) | <i>Geelkuifpikkewyn</i>     | 44 Cape Gannet           | <i>Morus capensis</i>  | Mass                            | 2     | 3200 | 2229.1  | 1024.5  | 1201    | 155839  |
| Wing                 | 446                          |                                  |                             |                          |                        | 497                             | 465.3 | 63.2 | 47      | 155839  | Unknown |         |
| Head                 | 179                          |                                  |                             |                          |                        | 179                             | 178.6 | NA   | 1       | 155839  | Unknown |         |
| Culmen               | 94                           |                                  |                             |                          |                        | 94                              | 94    | NA   | 1       | 155839  | Unknown |         |
| Tail                 | 220                          |                                  |                             |                          |                        | 220                             | 220   | NA   | 1       | 155839  | Unknown |         |
| Threskiornithidae    | 81 African Sacred Ibis       |                                  |                             |                          |                        | <i>Threskiornis aethiopicus</i> | Mass  | 973  | 1618    | 1301.9  | 230.6   | 152     |
|                      |                              | Wing                             | 131                         | 399                      | 309.1                  |                                 | 85.1  | 152  | 9083    | Unknown |         |         |
|                      |                              | Head                             | 195                         | 218                      | 202.5                  |                                 | 11.9  | 4    | 9083    | Unknown |         |         |
|                      |                              | Culmen                           | 135                         | 174                      | 155                    |                                 | 17.5  | 7    | 9083    | Unknown |         |         |
|                      |                              | Tarsus                           | 97                          | 112                      | 104.6                  |                                 | 6.9   | 6    | 9083    | Unknown |         |         |
|                      |                              | Tail                             | 141                         | 150                      | 147.5                  |                                 | 5     | 4    | 9083    | Unknown |         |         |
| 83 Glossy Ibis       | <i>Plegadis falcinellus</i>  | Mass                             | 14                          | 524                      | 247.4                  | 253.2                           | 6     | 638  | Unknown |         |         |         |

|               |            |                               |                            |        |     |      |        |       |      |       |         |
|---------------|------------|-------------------------------|----------------------------|--------|-----|------|--------|-------|------|-------|---------|
| Coliiformes   | Coliidae   | 84 Hadada Ibis                | <i>Bostrychia hagedash</i> | Wing   | 103 | 282  | 245.4  | 75.6  | 7    | 638   | Unknown |
|               |            |                               |                            | Head   | 138 | 170  | 150    | 13.2  | 6    | 638   | Unknown |
|               |            |                               |                            | Culmen | 101 | 132  | 113.3  | 12.2  | 6    | 638   | Unknown |
|               |            |                               |                            | Tarsus | 80  | 102  | 88.2   | 9.1   | 5    | 638   | Unknown |
|               |            |                               |                            | Tail   | 55  | 55   | 55     | NA    | 1    | 638   | Unknown |
|               |            |                               |                            | Mass   | 856 | 1523 | 1196.6 | 192.9 | 169  | 1989  | Unknown |
|               |            |                               |                            | Wing   | 308 | 376  | 348.6  | 15.9  | 181  | 1989  | Unknown |
|               |            |                               |                            | Head   | 126 | 180  | 163    | 13.3  | 71   | 1989  | Unknown |
|               |            |                               |                            | Culmen | 106 | 135  | 122.4  | 8.2   | 78   | 1989  | Unknown |
|               |            |                               |                            | Tarsus | 62  | 81   | 69.2   | 4.9   | 60   | 1989  | Unknown |
|               |            | 392 Red-faced Mousebird       | <i>Urocolius indicus</i>   | Tail   | 130 | 170  | 151.2  | 11.1  | 78   | 1989  | Unknown |
|               |            |                               |                            | Wing   | 87  | 101  | 94.1   | 4.8   | 3976 | 6875  | Yes     |
|               |            |                               |                            | Head   | 25  | 188  | 38.6   | 30.6  | 772  | 6875  | Unknown |
|               |            |                               |                            | Culmen | 12  | 21   | 15.1   | 2.4   | 775  | 6875  | Unknown |
|               |            |                               |                            | Tarsus | 18  | 30   | 22.2   | 16.9  | 500  | 6875  | Unknown |
|               |            | 390 Speckled Mousebird        | <i>Colius striatus</i>     | Tail   | 22  | 251  | 205.8  | 46.8  | 1324 | 6875  | No      |
|               |            |                               |                            | Mass   | 45  | 68   | 56.3   | 6.4   | 5629 | 6875  | Yes     |
|               |            |                               |                            | Mass   | 40  | 63   | 51     | 5.9   | 9306 | 12372 | Yes     |
|               |            |                               |                            | Wing   | 85  | 98   | 92.1   | 3.1   | 7134 | 12372 | No      |
|               |            |                               |                            | Head   | 30  | 34   | 31.7   | 1.1   | 1910 | 12372 | Unknown |
| Columbiformes | Columbidae | 391 White-backed Mousebird    | <i>Colius colius</i>       | Culmen | 12  | 19   | 14     | 1.7   | 2113 | 12372 | Unknown |
|               |            |                               |                            | Tarsus | 20  | 26   | 22.7   | 1.4   | 1490 | 12372 | Unknown |
|               |            |                               |                            | Tail   | 92  | 233  | 201.8  | 34.7  | 3013 | 12372 | Unknown |
|               |            |                               |                            | Mass   | 34  | 52   | 42.4   | 4.5   | 4070 | 5362  | No      |
|               |            |                               |                            | Wing   | 83  | 95   | 89.6   | 2.8   | 3026 | 5362  | Unknown |
|               |            | 323 African Green Pigeon      | <i>Treron calvus</i>       | Head   | 28  | 37   | 30.1   | 5.9   | 402  | 5362  | Unknown |
|               |            |                               |                            | Culmen | 12  | 18   | 13.7   | 1.8   | 410  | 5362  | Unknown |
|               |            |                               |                            | Tarsus | 19  | 25   | 20.9   | 1.2   | 339  | 5362  | Unknown |
|               |            |                               |                            | Tail   | 123 | 234  | 204.8  | 27.8  | 944  | 5362  | Unknown |
|               |            |                               |                            | Mass   | 183 | 297  | 244.5  | 28.7  | 125  | 174   | Unknown |
|               |            | 312 African Olive Pigeon      | <i>Columba arquatrix</i>   | Wing   | 160 | 185  | 175    | 6.4   | 126  | 174   | Unknown |
|               |            |                               |                            | Head   | 48  | 54   | 50.8   | 1.4   | 90   | 174   | Unknown |
|               |            |                               |                            | Culmen | 18  | 25   | 21     | 1.8   | 79   | 174   | Unknown |
|               |            |                               |                            | Tarsus | 19  | 28   | 24.6   | 2.4   | 68   | 174   | Unknown |
|               |            |                               |                            | Tail   | 87  | 113  | 100.8  | 6.9   | 95   | 174   | Unknown |
|               |            | 320 Blue-spotted Wood Dove    | <i>Turtur afer</i>         | Mass   | 252 | 528  | 414.3  | 62.5  | 245  | 292   | Unknown |
|               |            |                               |                            | Wing   | 207 | 244  | 227.4  | 10    | 206  | 292   | Unknown |
|               |            |                               |                            | Head   | 56  | 63   | 59.2   | 1.9   | 104  | 292   | Unknown |
|               |            |                               |                            | Culmen | 19  | 32   | 24.1   | 3.9   | 85   | 292   | Unknown |
|               |            |                               |                            | Tarsus | 26  | 32   | 29     | 1.7   | 95   | 292   | Unknown |
|               |            | 321 Emerald-spotted Wood Dove | <i>Turtur chalcospilos</i> | Tail   | 122 | 155  | 138.3  | 9.3   | 154  | 292   | Unknown |
|               |            |                               |                            | Mass   | 65  | 68   | 66.5   | 2.1   | 2    | 185   | Unknown |
|               |            |                               |                            | Wing   | 101 | 117  | 109.6  | 6.3   | 1687 | 2811  | No      |
|               |            |                               |                            | Head   | 34  | 40   | 37.9   | 4.2   | 467  | 2811  | Unknown |



|                            |                                  |        |     |     |       |        |       |       |         |
|----------------------------|----------------------------------|--------|-----|-----|-------|--------|-------|-------|---------|
| 317 Laughing Dove          | <i>Spilopelia senegalensis</i>   | Culmen | 12  | 19  | 15.9  | 4.1    | 481   | 2811  | Unknown |
|                            |                                  | Tarsus | 17  | 23  | 19.8  | 4.1    | 294   | 2811  | Unknown |
|                            |                                  | Tail   | 68  | 87  | 78.1  | 7      | 711   | 2811  | No      |
|                            |                                  | Mass   | 71  | 119 | 96.4  | 12.2   | 30804 | 56833 | Yes     |
|                            |                                  | Wing   | 125 | 146 | 135.9 | 7      | 20140 | 56833 | Yes     |
|                            |                                  | Head   | 33  | 52  | 42.4  | 10.6   | 3626  | 56833 | Unknown |
|                            |                                  | Culmen | 14  | 21  | 17.5  | 5      | 3619  | 56833 | Unknown |
|                            |                                  | Tarsus | 18  | 26  | 22.1  | 12     | 2679  | 56833 | Unknown |
| 322 Lemon Dove             | <i>Columba larvata</i>           | Tail   | 52  | 123 | 108.2 | 14.2   | 5869  | 56833 | Yes     |
|                            |                                  | Mass   | 98  | 193 | 160.4 | 22.3   | 425   | 739   | Yes     |
|                            |                                  | Wing   | 140 | 163 | 151   | 7.6    | 387   | 739   | Yes     |
|                            |                                  | Head   | 42  | 103 | 48.4  | 12.5   | 135   | 739   | Unknown |
|                            |                                  | Culmen | 13  | 27  | 19.9  | 4.3    | 129   | 739   | Unknown |
|                            |                                  | Tarsus | 26  | 32  | 29    | 2.2    | 75    | 739   | Unknown |
|                            |                                  | Tail   | 46  | 118 | 101.9 | 14.1   | 176   | 739   | No      |
|                            |                                  | Mass   | 126 | 198 | 161.8 | 21.4   | 127   | 178   | Unknown |
| 315 Mourning Collared Dove | <i>Streptopelia decipiens</i>    | Wing   | 147 | 175 | 160.4 | 7.7    | 88    | 178   | Unknown |
|                            |                                  | Head   | 45  | 52  | 49    | 5      | 60    | 178   | Unknown |
|                            |                                  | Culmen | 16  | 25  | 19.7  | 2.5    | 66    | 178   | Unknown |
|                            |                                  | Tarsus | 20  | 29  | 25.1  | 2.3    | 53    | 178   | Unknown |
|                            |                                  | Tail   | 107 | 127 | 117.6 | 5.6    | 39    | 178   | Unknown |
|                            |                                  | Mass   | 34  | 48  | 39.9  | 3.8    | 3073  | 5652  | Yes     |
|                            |                                  | Wing   | 99  | 112 | 105.5 | 3.3    | 2493  | 5652  | Yes     |
|                            |                                  | Head   | 29  | 34  | 32.4  | 6      | 304   | 5652  | Unknown |
| 318 Namaqua Dove           | <i>Oena capensis</i>             | Culmen | 13  | 19  | 15.7  | 10.9   | 317   | 5652  | Unknown |
|                            |                                  | Tarsus | 13  | 19  | 15.4  | 1.4    | 171   | 5652  | Unknown |
|                            |                                  | Tail   | 92  | 150 | 133.9 | 17.6   | 646   | 5652  | Yes     |
|                            |                                  | Mass   | 139 | 296 | 233.1 | 40.3   | 2324  | 3590  | No      |
|                            |                                  | Wing   | 160 | 202 | 186.4 | 10.7   | 2038  | 3590  | No      |
|                            |                                  | Head   | 47  | 128 | 54.5  | 15.1   | 647   | 3590  | Unknown |
|                            |                                  | Culmen | 17  | 29  | 23.5  | 12.6   | 669   | 3590  | Unknown |
|                            |                                  | Tarsus | 23  | 50  | 154.5 | 2614.8 | 451   | 3590  | Unknown |
| 314 Red-eyed Dove          | <i>Streptopelia semitorquata</i> | Tail   | 52  | 149 | 127.6 | 20.6   | 976   | 3590  | No      |
|                            |                                  | Mass   | 105 | 177 | 144.2 | 18.5   | 5090  | 8570  | No      |
|                            |                                  | Wing   | 140 | 167 | 155.5 | 7.6    | 3763  | 8570  | No      |
|                            |                                  | Head   | 41  | 66  | 48    | 11.9   | 865   | 8570  | Unknown |
|                            |                                  | Culmen | 13  | 26  | 19.7  | 12.5   | 860   | 8570  | Unknown |
|                            |                                  | Tarsus | 21  | 31  | 25    | 3.5    | 627   | 8570  | Unknown |
|                            |                                  | Tail   | 76  | 125 | 108.9 | 14.4   | 1454  | 8570  | Yes     |
|                            |                                  | Mass   | 220 | 384 | 300.7 | 46.6   | 127   | 183   | Unknown |
| 316 Ring-necked Dove       | <i>Streptopelia capicola</i>     | Wing   | 217 | 239 | 227.9 | 6.4    | 112   | 183   | Unknown |
|                            |                                  | Head   | 51  | 56  | 53.2  | 1.5    | 28    | 183   | Unknown |
|                            |                                  | Culmen | 18  | 25  | 20    | 1.9    | 28    | 183   | Unknown |
|                            |                                  | Tarsus | 30  | 35  | 32.5  | 1.7    | 30    | 183   | Unknown |
|                            |                                  | Tail   | 105 | 128 | 117.6 | 6.9    | 89    | 183   | Unknown |
| 940 Rock Dove              | <i>Columba livia</i>             | Wing   | 51  | 56  | 53.2  | 1.5    | 28    | 183   | Unknown |
|                            |                                  | Head   | 18  | 25  | 20    | 1.9    | 28    | 183   | Unknown |
|                            |                                  | Tarsus | 30  | 35  | 32.5  | 1.7    | 30    | 183   | Unknown |
|                            |                                  | Tail   | 105 | 128 | 117.6 | 6.9    | 89    | 183   | Unknown |

|                   |                           |                              |                              |        |       |       |       |      |         |         |         |
|-------------------|---------------------------|------------------------------|------------------------------|--------|-------|-------|-------|------|---------|---------|---------|
| Coraciiformes     | Alcedinidae               | 311 Speckled Pigeon          | <i>Columba guinea</i>        | Mass   | 220   | 387   | 317.6 | 40.4 | 1721    | 3116    | Yes     |
|                   |                           |                              |                              | Wing   | 193   | 240   | 224.1 | 15   | 1020    | 3116    | Yes     |
|                   |                           |                              |                              | Head   | 50    | 57    | 53.9  | 6.7  | 259     | 3116    | Unknown |
|                   |                           |                              |                              | Culmen | 18    | 28    | 24.3  | 13.9 | 246     | 3116    | Unknown |
|                   |                           |                              |                              | Tarsus | 26    | 35    | 29.5  | 2    | 200     | 3116    | Unknown |
|                   |                           |                              |                              | Tail   | 92    | 135   | 114.4 | 11.4 | 342     | 3116    | No      |
|                   |                           | 319 Tambourine Dove          | <i>Turtur tympanistria</i>   | Mass   | 62    | 85    | 72.3  | 5.9  | 1404    | 1963    | No      |
|                   |                           |                              |                              | Wing   | 107   | 121   | 114.3 | 3.7  | 1202    | 1963    | Yes     |
|                   |                           |                              |                              | Head   | 36    | 41    | 38.5  | 1.2  | 380     | 1963    | Unknown |
|                   |                           |                              |                              | Culmen | 14    | 20    | 16.9  | 1.7  | 445     | 1963    | Unknown |
|                   | Cerylidae                 | 398 African Pygmy Kingfisher | <i>Ispidina picta</i>        | Tarsus | 20    | 25    | 21.9  | 1.2  | 236     | 1963    | Unknown |
|                   |                           |                              |                              | Tail   | 80    | 97    | 89    | 4.6  | 572     | 1963    | Yes     |
|                   |                           |                              |                              | Tarsus | 8     | 46    | 11.8  | 10   | 127     | 2593    | Unknown |
|                   |                           |                              |                              | Mass   | 12    | 19    | 15    | 4.3  | 1091    | 2593    | No      |
|                   |                           |                              |                              | Wing   | 50    | 58    | 54    | 4.4  | 973     | 2593    | Unknown |
|                   |                           |                              |                              | Head   | 36    | 48    | 44.5  | 3.4  | 404     | 2593    | Unknown |
|                   |                           | 396 Half-collared Kingfisher | <i>Alcedo semitorquata</i>   | Culmen | 22    | 30    | 26.6  | 2.4  | 433     | 2593    | Unknown |
|                   |                           |                              |                              | Tail   | 23    | 31    | 25.7  | 2.6  | 493     | 2593    | Unknown |
|                   |                           |                              |                              | Mass   | 31    | 62    | 44.3  | 23.6 | 175     | 251     | Unknown |
|                   |                           |                              |                              | Wing   | 79    | 88    | 84.1  | 4.7  | 165     | 251     | Unknown |
|                   |                           | 397 Malachite Kingfisher     | <i>Corythornis cristatus</i> | Head   | 68    | 82    | 75.9  | 3.8  | 72      | 251     | Unknown |
|                   |                           |                              |                              | Culmen | 39    | 55    | 47.6  | 4.5  | 72      | 251     | Unknown |
|                   |                           |                              |                              | Tarsus | 10    | 15    | 12    | 1.2  | 34      | 251     | Unknown |
|                   |                           |                              |                              | Tail   | 40    | 52    | 43.3  | 3.1  | 79      | 251     | Unknown |
|                   |                           |                              |                              | Mass   | 14    | 24    | 17.9  | 4.6  | 2359    | 4153    | No      |
| Cerylidae         | 394 Pied Kingfisher       | <i>Ceryle rudis</i>          | Wing                         | 53     | 63    | 58.3  | 4.3   | 2052 | 4153    | No      |         |
|                   |                           |                              | Head                         | 33     | 58    | 52.9  | 4.6   | 543  | 4153    | Unknown |         |
|                   |                           |                              | Tarsus                       | 7      | 23    | 10.6  | 5.6   | 237  | 4153    | Unknown |         |
|                   |                           |                              | Tail                         | 25     | 35    | 28.7  | 3.6   | 823  | 4153    | Unknown |         |
|                   |                           |                              | Culmen                       | 26     | 38    | 32.5  | 3.5   | 584  | 4153    | Unknown |         |
|                   |                           |                              | Head                         | 89     | 101   | 95.1  | 3     | 141  | 523     | Unknown |         |
|                   |                           |                              | Culmen                       | 54     | 68    | 60.6  | 3.5   | 133  | 523     | Unknown |         |
|                   |                           |                              | Tarsus                       | 11     | 16    | 13.5  | 1.3   | 73   | 523     | Unknown |         |
| Coraciidae        | 412 European Roller       | <i>Coracias garrulus</i>     | Tail                         | 72     | 91    | 79.4  | 4.3   | 128  | 523     | No      |         |
|                   |                           |                              | Mass                         | 66     | 100   | 79.9  | 8.7   | 379  | 523     | No      |         |
|                   |                           |                              | Wing                         | 132    | 144   | 138.8 | 3     | 292  | 523     | No      |         |
|                   |                           |                              | Mass                         | 111    | 161   | 140.3 | 13.6  | 27   | 40      | Unknown |         |
|                   | 413 Lilac-breasted Roller | <i>Coracias caudatus</i>     | Wing                         | 185    | 205   | 197.3 | 6.3   | 24   | 40      | Unknown |         |
|                   |                           |                              | Mass                         | 91     | 140   | 112.6 | 12.7  | 796  | 988     | Unknown |         |
|                   |                           |                              | Head                         | 64     | 168   | 77.4  | 27.9  | 116  | 988     | Unknown |         |
|                   |                           |                              | Tail                         | 34     | 216   | 148.5 | 51.7  | 134  | 988     | Unknown |         |
|                   |                           |                              | Wing                         | 116    | 177   | 165.1 | 11.6  | 791  | 988     | Unknown |         |
|                   |                           |                              | Culmen                       | 29     | 72    | 43    | 12.5  | 123  | 988     | Unknown |         |
| 415 Purple Roller | <i>Coracias naevius</i>   | Tarsus                       | 22                           | 202    | 38.6  | 46.5  | 120   | 988  | Unknown |         |         |
|                   |                           | Mass                         | 142                          | 202    | 165.8 | 15.3  | 181   | 220  | Unknown |         |         |

|                         |                             |                            |        |        |       |       |       |      |         |         |         |
|-------------------------|-----------------------------|----------------------------|--------|--------|-------|-------|-------|------|---------|---------|---------|
| Dacelonidae             | 402 Brown-hooded Kingfisher | <i>Halcyon albiventris</i> | Wing   | 160    | 201   | 190.6 | 9.2   | 180  | 220     | Unknown |         |
|                         |                             |                            | Head   | 76     | 191   | 87    | 25.2  | 111  | 220     | Unknown |         |
|                         |                             |                            | Culmen | 39     | 82    | 48.9  | 9.2   | 113  | 220     | Unknown |         |
|                         |                             |                            | Tarsus | 25     | 139   | 33.7  | 25.8  | 107  | 220     | Unknown |         |
|                         |                             |                            | Tail   | 46     | 153   | 137.7 | 21.9  | 122  | 220     | Unknown |         |
|                         |                             |                            |        | Wing   | 98    | 113   | 105.2 | 6.2  | 2265    | 3565    | Yes     |
|                         |                             |                            |        | Tarsus | 14    | 29    | 18.7  | 12   | 524     | 3565    | Unknown |
|                         |                             |                            |        | Tail   | 64    | 78    | 69.4  | 4.2  | 1070    | 3565    | No      |
|                         |                             |                            |        | Mass   | 52    | 80    | 64.3  | 7.2  | 2697    | 3565    | No      |
|                         |                             |                            |        | Head   | 69    | 83    | 76.9  | 4.3  | 842     | 3565    | Unknown |
|                         | 395 Giant Kingfisher        | <i>Megaceryle maxima</i>   | Culmen | 37     | 54    | 46.8  | 5.5   | 911  | 3565    | Unknown |         |
|                         |                             |                            | Mass   | 256    | 410   | 343.2 | 52.3  | 214  | 308     | Yes     |         |
|                         |                             |                            | Culmen | 79     | 106   | 92    | 7.2   | 55   | 308     | Unknown |         |
|                         |                             |                            | Wing   | 192    | 215   | 203.7 | 10.2  | 180  | 308     | Yes     |         |
|                         |                             |                            | Head   | 133    | 150   | 144.4 | 4.6   | 54   | 308     | Unknown |         |
|                         |                             |                            |        | Tarsus | 16    | 29    | 20.7  | 3.3  | 26      | 308     | Unknown |
|                         |                             |                            |        | Tail   | 111   | 140   | 120.7 | 6.9  | 61      | 308     | No      |
|                         |                             |                            |        | Head   | 36    | 70    | 61.8  | 12.9 | 20      | 411     | Unknown |
|                         |                             |                            |        | Culmen | 18    | 46    | 39.6  | 9.4  | 19      | 411     | Unknown |
|                         |                             |                            |        | Tarsus | 14    | 23    | 17    | 3.1  | 17      | 411     | Unknown |
|                         |                             |                            | Tail   | 53     | 81    | 61.9  | 9.5   | 34   | 411     | Unknown |         |
|                         |                             |                            | Mass   | 22     | 54    | 43.9  | 7.4   | 82   | 411     | Unknown |         |
|                         |                             |                            | Wing   | 85     | 105   | 99.3  | 6.4   | 64   | 411     | Unknown |         |
|                         |                             |                            | Wing   | 74     | 98    | 83    | 5.4   | 50   | 216     | Unknown |         |
|                         |                             |                            | Head   | 61     | 66    | 63.1  | 1.6   | 14   | 216     | Unknown |         |
| 403 Striped Kingfisher  | <i>Halcyon chelicuti</i>    | Tarsus                     | 12     | 15     | 13.5  | 0.9   | 7     | 216  | Unknown |         |         |
|                         |                             | Tail                       | 39     | 51     | 45.7  | 3.4   | 17    | 216  | Unknown |         |         |
|                         |                             | Mass                       | 36     | 60     | 45.1  | 5.9   | 75    | 216  | Unknown |         |         |
|                         |                             | Culmen                     | 33     | 39     | 35.9  | 2.2   | 11    | 216  | Unknown |         |         |
|                         |                             | Head                       | 31     | 82     | 72.1  | 13.6  | 319   | 945  | Unknown |         |         |
| 399 Woodland Kingfisher | <i>Halcyon senegalensis</i> | Culmen                     | 39     | 56     | 48.4  | 5.7   | 300   | 945  | Unknown |         |         |
|                         |                             | Tail                       | 52     | 80     | 67.7  | 7.5   | 395   | 945  | No      |         |         |
|                         |                             | Mass                       | 54     | 84     | 65.4  | 7.8   | 671   | 945  | No      |         |         |
|                         |                             | Wing                       | 104    | 119    | 112.2 | 4.4   | 616   | 945  | No      |         |         |
|                         |                             | Tarsus                     | 13     | 44     | 17.6  | 8     | 269   | 945  | Unknown |         |         |
| Meropidae               | 405 Blue-cheeked Bee-eater  | <i>Merops persicus</i>     | Head   | 67     | 72    | 68.8  | 1.5   | 12   | 103     | Unknown |         |
|                         |                             |                            | Culmen | 41     | 50    | 46.3  | 3.4   | 13   | 103     | Unknown |         |
|                         |                             |                            | Tarsus | 12     | 14    | 12.8  | 0.5   | 6    | 103     | Unknown |         |
|                         |                             |                            | Tail   | 90     | 144   | 117.8 | 20.3  | 16   | 103     | Unknown |         |
|                         |                             |                            | Mass   | 40     | 55    | 46.8  | 4     | 46   | 103     | Unknown |         |
|                         | 408 Böhm's Bee-eater        | <i>Merops boehmi</i>       | Wing   | 130    | 151   | 141.7 | 6.6   | 32   | 103     | Unknown |         |
|                         |                             |                            | Mass   | 16     | 20    | 17.9  | 1.4   | 7    | 150     | Unknown |         |
|                         |                             |                            | Wing   | 82     | 82    | 82    | 0     | 3    | 150     | Unknown |         |
|                         | 404 European Bee-eater      | <i>Merops apiaster</i>     | Mass   | 44     | 64    | 52.3  | 5.2   | 285  | 533     | No      |         |
|                         |                             |                            | Wing   | 133    | 154   | 145.1 | 5.2   | 180  | 533     | Yes     |         |

|                    |               |                                |                               |        |     |       |       |      |      |         |         |
|--------------------|---------------|--------------------------------|-------------------------------|--------|-----|-------|-------|------|------|---------|---------|
| Cuculiformes       | Centropodidae | 410 Little Bee-eater           | <i>Merops pusillus</i>        | Head   | 61  | 69    | 64.7  | 2.1  | 64   | 533     | Unknown |
|                    |               |                                |                               | Culmen | 33  | 46    | 39.7  | 3.5  | 64   | 533     | Unknown |
|                    |               |                                |                               | Tarsus | 11  | 17    | 14.9  | 9.9  | 54   | 533     | Unknown |
|                    |               |                                |                               | Tail   | 89  | 130   | 107.5 | 12.1 | 70   | 533     | Unknown |
|                    |               |                                |                               | Tarsus | 8   | 11    | 9.3   | 0.9  | 54   | 1263    | Unknown |
|                    |               |                                |                               | Mass   | 13  | 54    | 17.3  | 10.1 | 407  | 1263    | Unknown |
|                    |               |                                |                               | Wing   | 23  | 85    | 77.9  | 11   | 327  | 1263    | Unknown |
|                    |               |                                |                               | Head   | 40  | 49    | 44.8  | 2.6  | 137  | 1263    | Unknown |
|                    |               | 406 Olive Bee-eater            | <i>Merops superciliosus</i>   | Culmen | 22  | 40    | 28.6  | 3.6  | 148  | 1263    | Unknown |
|                    |               |                                |                               | Tail   | 58  | 75    | 65.1  | 4.4  | 164  | 1263    | Unknown |
|                    |               |                                |                               | Mass   | 42  | 51    | 45.8  | 2.8  | 35   | 206     | Unknown |
|                    |               | 407 Southern Carmine Bee-eater | <i>Merops nubicoides</i>      | Wing   | 132 | 144   | 137.9 | 3.4  | 28   | 206     | Unknown |
|                    |               |                                |                               | Mass   | 50  | 65    | 57.2  | 3.9  | 1153 | 1368    | Unknown |
|                    |               |                                |                               | Wing   | 145 | 158   | 151.9 | 3.5  | 1099 | 1368    | Unknown |
|                    |               | 411 Swallow-tailed Bee-eater   | <i>Merops hirundineus</i>     | Head   | 61  | 70    | 66    | 2.6  | 19   | 1368    | Unknown |
|                    |               |                                |                               | Culmen | 40  | 46    | 42.9  | 1.5  | 18   | 1368    | Unknown |
|                    |               |                                |                               | Head   | 45  | 53    | 49.9  | 2.6  | 36   | 159     | Unknown |
|                    |               |                                |                               | Culmen | 26  | 37    | 31.1  | 3.1  | 35   | 159     | Unknown |
|                    |               |                                |                               | Tarsus | 9   | 14    | 10.6  | 1.2  | 24   | 159     | Unknown |
|                    |               |                                |                               | Tail   | 79  | 105   | 94.4  | 8.6  | 38   | 159     | Unknown |
|                    |               | 409 White-fronted Bee-eater    | <i>Merops bullockoides</i>    | Mass   | 17  | 25    | 22    | 15.6 | 102  | 159     | Unknown |
|                    |               |                                |                               | Wing   | 84  | 97    | 92.4  | 3.7  | 95   | 159     | Unknown |
|                    |               |                                |                               | Head   | 40  | 62    | 56.5  | 4.5  | 209  | 928     | Unknown |
|                    |               |                                |                               | Culmen | 31  | 42    | 35.7  | 2.7  | 207  | 928     | Unknown |
|                    |               |                                |                               | Tarsus | 11  | 16    | 12.8  | 1.3  | 112  | 928     | Unknown |
|                    |               |                                |                               | Mass   | 28  | 39    | 32.2  | 2.8  | 688  | 928     | Unknown |
|                    | Cuculidae     | 4131 Burchell's Coucal         | <i>Centropus burchellii</i>   | Wing   | 105 | 117   | 112.5 | 3    | 452  | 928     | Unknown |
|                    |               |                                |                               | Tail   | 89  | 109   | 96.8  | 4.4  | 197  | 928     | Unknown |
|                    |               |                                |                               | Wing   | 155 | 183   | 171.1 | 30.4 | 103  | 133     | Unknown |
|                    |               |                                |                               | Head   | 57  | 67    | 62.4  | 2.7  | 66   | 133     | Unknown |
|                    |               |                                |                               | Culmen | 28  | 40    | 32.9  | 2.9  | 70   | 133     | Unknown |
|                    |               |                                |                               | Tail   | 150 | 236   | 210.5 | 19.8 | 81   | 133     | Unknown |
|                    |               | 355 Senegal Coucal             | <i>Centropus senegalensis</i> | Mass   | 156 | 237   | 187.4 | 21.2 | 91   | 133     | Unknown |
|                    |               |                                |                               | Tarsus | 40  | 47    | 43.6  | 1.9  | 37   | 133     | Unknown |
|                    |               |                                |                               | Mass   | 163 | 198   | 178.2 | 12.7 | 10   | 21      | Unknown |
|                    |               |                                |                               | Wing   | 169 | 180   | 174   | 4.3  | 7    | 21      | Unknown |
|                    |               |                                |                               | Head   | 62  | 65    | 62.8  | 1.5  | 4    | 21      | Unknown |
|                    |               |                                |                               | Culmen | 34  | 35    | 34.5  | 0.9  | 3    | 21      | Unknown |
| 341 African Cuckoo |               | <i>Cuculus gularis</i>         | Tarsus                        | 43     | 43  | 43    | 0.1   | 3    | 21   | Unknown |         |
|                    |               |                                | Tail                          | 214    | 218 | 216.7 | 2.3   | 3    | 21   | Unknown |         |
|                    |               |                                | Mass                          | 91     | 152 | 107.7 | 13.3  | 42   | 74   | Unknown |         |
|                    |               |                                | Wing                          | 205    | 228 | 213.9 | 7.2   | 41   | 74   | Unknown |         |
|                    |               |                                | Head                          | 52     | 57  | 54.1  | 1.4   | 16   | 74   | Unknown |         |
|                    |               |                                | Culmen                        | 25     | 33  | 29.4  | 2.2   | 16   | 74   | Unknown |         |
|                    |               |                                | Tarsus                        | 21     | 24  | 22.4  | 1     | 11   | 74   | Unknown |         |

|                            |                                |        |     |     |       |      |     |      |         |
|----------------------------|--------------------------------|--------|-----|-----|-------|------|-----|------|---------|
| 350 African Emerald Cuckoo | <i>Chrysococcyx cupreus</i>    | Tail   | 152 | 170 | 161.7 | 5.2  | 15  | 74   | Unknown |
|                            |                                | Mass   | 31  | 43  | 36.1  | 3.6  | 16  | 39   | Unknown |
|                            |                                | Wing   | 100 | 110 | 106.5 | 3.2  | 15  | 39   | Unknown |
|                            |                                | Head   | 38  | 39  | 38.6  | 0.6  | 2   | 39   | Unknown |
|                            |                                | Culmen | 18  | 20  | 18.8  | 1.2  | 3   | 39   | Unknown |
|                            |                                | Tarsus | 17  | 17  | 17.2  | NA   | 1   | 39   | Unknown |
| 344 Black Cuckoo           | <i>Cuculus clamosus</i>        | Tail   | 76  | 84  | 78.8  | 3.6  | 4   | 39   | Unknown |
|                            |                                | Mass   | 75  | 127 | 89.8  | 16.1 | 73  | 92   | Unknown |
|                            |                                | Wing   | 167 | 190 | 178.5 | 6.2  | 63  | 92   | Unknown |
|                            |                                | Head   | 44  | 54  | 51.2  | 3.1  | 22  | 92   | Unknown |
|                            |                                | Culmen | 22  | 31  | 26.3  | 3.2  | 21  | 92   | Unknown |
|                            |                                | Tarsus | 19  | 23  | 20.9  | 1.4  | 16  | 92   | Unknown |
| 352 Diederik Cuckoo        | <i>Chrysococcyx caprius</i>    | Tail   | 143 | 161 | 152.9 | 5.3  | 25  | 92   | Unknown |
|                            |                                | Mass   | 27  | 44  | 33.6  | 4.8  | 977 | 1690 | Yes     |
|                            |                                | Wing   | 104 | 125 | 117.3 | 5.3  | 801 | 1690 | Yes     |
|                            |                                | Head   | 22  | 43  | 38.6  | 8.7  | 233 | 1690 | Unknown |
|                            |                                | Culmen | 15  | 24  | 20.1  | 10   | 221 | 1690 | Unknown |
|                            |                                | Tarsus | 16  | 39  | 20.9  | 15.1 | 191 | 1690 | Unknown |
| 346 Great Spotted Cuckoo   | <i>Clamator glandarius</i>     | Tail   | 41  | 95  | 83    | 11.7 | 320 | 1690 | No      |
|                            |                                | Mass   | 105 | 160 | 130.3 | 19.6 | 12  | 45   | Unknown |
|                            |                                | Wing   | 185 | 212 | 195.7 | 9.5  | 11  | 45   | Unknown |
|                            |                                | Head   | 58  | 58  | 57.7  | NA   | 1   | 45   | Unknown |
|                            |                                | Culmen | 30  | 33  | 31.6  | 1.4  | 3   | 45   | Unknown |
|                            |                                | Tarsus | 32  | 32  | 32.3  | 0.1  | 2   | 45   | Unknown |
| 358 Green Malkoha          | <i>Ceuthmochares australis</i> | Tail   | 186 | 203 | 197   | 10.4 | 3   | 45   | Unknown |
|                            |                                | Mass   | 67  | 75  | 70.9  | 3.2  | 7   | 31   | Unknown |
|                            |                                | Wing   | 127 | 131 | 128.5 | 1.6  | 6   | 31   | Unknown |
| 348 Jacobin Cuckoo         | <i>Clamator jacobinus</i>      | Mass   | 61  | 109 | 79.2  | 15.6 | 58  | 102  | Unknown |
|                            |                                | Wing   | 143 | 164 | 154.5 | 5.7  | 48  | 102  | Unknown |
|                            |                                | Head   | 47  | 51  | 48.8  | 1.4  | 16  | 102  | Unknown |
|                            |                                | Culmen | 21  | 30  | 25.6  | 2.7  | 20  | 102  | Unknown |
|                            |                                | Tarsus | 25  | 28  | 27.1  | 1    | 12  | 102  | Unknown |
|                            |                                | Tail   | 164 | 191 | 180   | 8.1  | 24  | 102  | Unknown |
| 351 Klaas's Cuckoo         | <i>Chrysococcyx klaas</i>      | Mass   | 24  | 38  | 29.4  | 3.6  | 208 | 398  | No      |
|                            |                                | Wing   | 95  | 108 | 101.8 | 3.5  | 153 | 398  | No      |
|                            |                                | Head   | 30  | 38  | 35.9  | 2.7  | 31  | 398  | Unknown |
|                            |                                | Culmen | 14  | 21  | 17.5  | 2.4  | 37  | 398  | Unknown |
|                            |                                | Tarsus | 15  | 19  | 16.8  | 1.4  | 23  | 398  | Unknown |
|                            |                                | Tail   | 71  | 83  | 76.4  | 3.1  | 55  | 398  | Yes     |
| 347 Levaillant's Cuckoo    | <i>Clamator levaillantii</i>   | Mass   | 85  | 141 | 119.6 | 15.5 | 32  | 53   | Unknown |
|                            |                                | Wing   | 171 | 191 | 179.6 | 5.7  | 31  | 53   | Unknown |
|                            |                                | Head   | 52  | 60  | 55.3  | 2.5  | 13  | 53   | Unknown |
|                            |                                | Culmen | 25  | 33  | 29.2  | 3.1  | 13  | 53   | Unknown |
|                            |                                | Tarsus | 27  | 34  | 31.9  | 2.2  | 11  | 53   | Unknown |
|                            |                                | Tail   | 50  | 236 | 200.3 | 57.8 | 16  | 53   | Unknown |

|               |              |                               |                             |        |      |      |        |       |     |     |         |
|---------------|--------------|-------------------------------|-----------------------------|--------|------|------|--------|-------|-----|-----|---------|
| Falconiformes | Accipitridae | 343 Red-chested Cuckoo        | <i>Cuculus solitarius</i>   | Mass   | 62   | 92   | 76.6   | 7.3   | 152 | 245 | No      |
|               |              |                               |                             | Wing   | 149  | 184  | 172    | 12.6  | 132 | 245 | No      |
|               |              |                               |                             | Head   | 43   | 53   | 48.6   | 2.8   | 35  | 245 | Unknown |
|               |              |                               |                             | Culmen | 18   | 27   | 22.3   | 2.6   | 37  | 245 | Unknown |
|               |              |                               |                             | Tarsus | 18   | 26   | 21.5   | 2.2   | 26  | 245 | Unknown |
|               |              |                               |                             | Tail   | 104  | 164  | 149.2  | 18    | 50  | 245 | Unknown |
|               |              | 149 African Fish Eagle        | <i>Haliaeetus vocifer</i>   | Mass   | 2024 | 2863 | 2449.4 | 304.9 | 9   | 129 | Unknown |
|               |              |                               |                             | Wing   | 506  | 584  | 547.2  | 25.6  | 11  | 129 | Unknown |
|               |              |                               |                             | Head   | 108  | 112  | 110.7  | 1.8   | 7   | 129 | Unknown |
|               |              |                               |                             | Culmen | 41   | 55   | 48.6   | 6.4   | 9   | 129 | Unknown |
|               |              |                               |                             | Tarsus | 96   | 106  | 99.9   | 3.7   | 6   | 129 | Unknown |
|               |              |                               |                             | Tail   | 215  | 258  | 243.1  | 14.9  | 8   | 129 | Unknown |
|               |              | 160 African Goshawk           | <i>Accipiter tachiro</i>    | Mass   | 190  | 412  | 261.2  | 68.2  | 136 | 376 | Yes     |
|               |              |                               |                             | Wing   | 196  | 250  | 218.1  | 14.7  | 134 | 376 | Yes     |
|               |              |                               |                             | Head   | 52   | 61   | 56.1   | 3.1   | 37  | 376 | Unknown |
|               |              |                               |                             | Culmen | 15   | 45   | 23     | 9.8   | 40  | 376 | Unknown |
|               |              |                               |                             | Tarsus | 62   | 72   | 66.3   | 3.7   | 27  | 376 | Unknown |
|               |              |                               |                             | Tail   | 164  | 214  | 179.9  | 15.9  | 56  | 376 | Unknown |
|               |              | 171 African Harrier-Hawk      | <i>Polyboroides typus</i>   | Mass   | 166  | 966  | 741    | 275.5 | 11  | 60  | Unknown |
|               |              |                               |                             | Head   | 77   | 82   | 79.5   | 3.6   | 2   | 60  | Unknown |
|               |              |                               |                             | Culmen | 36   | 38   | 36.6   | 1     | 4   | 60  | Unknown |
|               |              |                               |                             | Tarsus | 87   | 87   | 87.4   | NA    | 1   | 60  | Unknown |
|               |              |                               |                             | Tail   | 287  | 300  | 293.8  | 5.4   | 4   | 60  | Unknown |
|               |              |                               |                             | Wing   | 423  | 472  | 453.5  | 17.5  | 8   | 60  | Unknown |
|               |              | 141 African Hawk-Eagle        | <i>Aquila spilogaster</i>   | Mass   | 1186 | 1902 | 1461.9 | 190.7 | 185 | 416 | Yes     |
|               |              |                               |                             | Culmen | 29   | 48   | 37.2   | 7.2   | 21  | 416 | Unknown |
|               |              |                               |                             | Tarsus | 91   | 102  | 96.3   | 2.9   | 49  | 416 | Unknown |
|               |              |                               |                             | Wing   | 408  | 474  | 463.8  | 181.8 | 124 | 416 | No      |
|               |              |                               |                             | Head   | 91   | 98   | 94.3   | 2.3   | 21  | 416 | Unknown |
|               |              |                               |                             | Tail   | 238  | 288  | 260    | 12.3  | 65  | 416 | Yes     |
|               |              | 153 Augur Buzzard             | <i>Buteo augur</i>          | Mass   | 716  | 1289 | 991.8  | 175.2 | 29  | 98  | Unknown |
|               |              |                               |                             | Wing   | 386  | 419  | 404.4  | 12.6  | 8   | 98  | Unknown |
|               |              | 140 Ayres's Hawk-Eagle        | <i>Hieraaetus ayresii</i>   | Mass   | 640  | 1036 | 845.7  | 172.8 | 6   | 22  | Unknown |
|               |              |                               |                             | Wing   | 362  | 380  | 371    | 12.7  | 2   | 22  | Unknown |
|               |              | 150 Bearded Vulture           | <i>Gypaetus barbatus</i>    | Mass   | 4906 | 6119 | 5433   | 380.1 | 16  | 46  | Unknown |
|               |              |                               |                             | Wing   | 702  | 762  | 736.5  | 22.2  | 8   | 46  | Unknown |
|               |              |                               |                             | Head   | 141  | 166  | 148.8  | 10.7  | 6   | 46  | Unknown |
|               |              |                               |                             | Culmen | 46   | 47   | 46.3   | 0.6   | 3   | 46  | Unknown |
|               |              |                               |                             | Tarsus | 100  | 118  | 105.6  | 6.7   | 7   | 46  | Unknown |
|               |              |                               |                             | Tail   | 424  | 480  | 454.3  | 20.9  | 7   | 46  | Unknown |
|               |              | 146 Black-chested Snake Eagle | <i>Circaetus pectoralis</i> | Mass   | 1130 | 1800 | 1459.2 | 242   | 442 | 790 | No      |
|               |              |                               |                             | Wing   | 335  | 1479 | 558.5  | 218   | 356 | 790 | No      |
|               |              |                               |                             | Head   | 10   | 268  | 111.2  | 48.4  | 91  | 790 | Unknown |
|               |              |                               |                             | Culmen | 32   | 103  | 42.7   | 28.6  | 92  | 790 | Unknown |
|               |              |                               |                             | Tarsus | 87   | 106  | 97.8   | 4.9   | 169 | 790 | Unknown |

|                                           |                               |        |      |      |        |        |      |      |         |
|-------------------------------------------|-------------------------------|--------|------|------|--------|--------|------|------|---------|
| 130 Black-winged Kite                     | <i>Elanus caeruleus</i>       | Tail   | 34   | 292  | 262.7  | 50.7   | 238  | 790  | No      |
|                                           |                               | Mass   | 200  | 295  | 244.4  | 23.8   | 1298 | 3044 | Yes     |
|                                           |                               | Wing   | 249  | 285  | 269.1  | 17.2   | 886  | 3044 | Unknown |
|                                           |                               | Head   | 46   | 120  | 56.3   | 14.8   | 212  | 3044 | Unknown |
|                                           |                               | Culmen | 15   | 33   | 20.8   | 15.1   | 212  | 3044 | Unknown |
|                                           |                               | Tarsus | 31   | 48   | 37     | 8.7    | 211  | 3044 | Unknown |
| 128 Black & Yellowbilled Kite (pre-split) | <i>Milvus migrans</i>         | Tail   | 35   | 135  | 116.4  | 17.7   | 370  | 3044 | Unknown |
|                                           |                               | Mass   | 551  | 1024 | 764.4  | 149.7  | 22   | 61   | Unknown |
|                                           |                               | Mass   | 551  | 1024 | 764.4  | 149.7  | 22   | 61   | Unknown |
|                                           |                               | Wing   | 108  | 432  | 365    | 121.7  | 9    | 61   | Unknown |
| 169 Black Harrier                         | <i>Circus maurus</i>          | Wing   | 108  | 432  | 365    | 121.7  | 9    | 61   | Unknown |
|                                           |                               | Mass   | 379  | 584  | 479.6  | 66.8   | 24   | 466  | Unknown |
|                                           |                               | Wing   | 347  | 369  | 359    | 7.4    | 9    | 466  | Unknown |
| 128 Black Kite                            | <i>Milvus migrans</i>         | Tail   | 77   | 247  | 137.5  | 102.6  | 3    | 466  | Unknown |
|                                           |                               | Mass   | 551  | 1024 | 764.4  | 149.7  | 22   | 61   | Unknown |
|                                           |                               | Mass   | 551  | 1024 | 764.4  | 149.7  | 22   | 61   | Unknown |
|                                           |                               | Wing   | 108  | 432  | 365    | 121.7  | 9    | 61   | Unknown |
| 159 Black Sparrowhawk                     | <i>Accipiter melanoleucus</i> | Wing   | 108  | 432  | 365    | 121.7  | 9    | 61   | Unknown |
|                                           |                               | Mass   | 495  | 1032 | 735.5  | 194.2  | 233  | 999  | Yes     |
|                                           |                               | Wing   | 275  | 360  | 313.5  | 27.1   | 207  | 999  | Yes     |
|                                           |                               | Head   | 64   | 76   | 68.9   | 4.4    | 11   | 999  | Unknown |
| 139 Booted Eagle                          | <i>Hieraaetus pennatus</i>    | Culmen | 20   | 36   | 29.2   | 4.4    | 65   | 999  | Unknown |
|                                           |                               | Tarsus | 69   | 97   | 82.2   | 11.3   | 74   | 999  | Unknown |
|                                           |                               | Tail   | 193  | 271  | 232.2  | 25.3   | 72   | 999  | Yes     |
|                                           |                               | Mass   | 529  | 1162 | 785.6  | 198.9  | 10   | 36   | Unknown |
|                                           |                               | Wing   | 325  | 345  | 335    | 15.6   | 2    | 36   | Unknown |
|                                           |                               | Head   | 84   | 84   | 84     | NA     | 1    | 36   | Unknown |
|                                           |                               | Culmen | 28   | 28   | 28.3   | NA     | 1    | 36   | Unknown |
| 145 Brown Snake Eagle                     | <i>Circaetus cinereus</i>     | Tarsus | 63   | 63   | 63.3   | NA     | 1    | 36   | Unknown |
|                                           |                               | Tail   | 210  | 210  | 210    | NA     | 1    | 36   | Unknown |
|                                           |                               | Mass   | 1528 | 2511 | 2038   | 263.9  | 172  | 270  | Unknown |
|                                           |                               | Wing   | 508  | 575  | 555.3  | 136.8  | 158  | 270  | Unknown |
|                                           |                               | Head   | 110  | 130  | 120.9  | 25.4   | 40   | 270  | Unknown |
|                                           |                               | Culmen | 39   | 60   | 45.9   | 12.2   | 40   | 270  | Unknown |
| 106 Cape Vulture                          | <i>Gyps coprotheres</i>       | Tarsus | 95   | 112  | 103.7  | 5      | 94   | 270  | Unknown |
|                                           |                               | Tail   | 240  | 290  | 268.7  | 12.1   | 117  | 270  | Unknown |
|                                           |                               | Mass   | 1850 | 9660 | 7917.3 | 1756.4 | 177  | 9105 | No      |
|                                           |                               | Wing   | 73   | 743  | 666.6  | 152.1  | 118  | 9105 | No      |
|                                           |                               | Head   | 144  | 258  | 164.3  | 29     | 63   | 9105 | Unknown |
|                                           |                               | Culmen | 56   | 88   | 77.6   | 9      | 32   | 9105 | Unknown |
| 154 Common Buzzard                        | <i>Buteo buteo</i>            | Tarsus | 99   | 120  | 108.8  | 5.5    | 39   | 9105 | Unknown |
|                                           |                               | Tail   | 136  | 315  | 263.2  | 61.6   | 30   | 9105 | Unknown |
|                                           |                               | Mass   | 525  | 967  | 748.4  | 114.2  | 1325 | 4655 | Yes     |
|                                           |                               | Wing   | 344  | 402  | 375.7  | 37.6   | 949  | 4655 | No      |
|                                           |                               | Head   | 21   | 192  | 82.7   | 33     | 219  | 4655 | Unknown |

|                           |                                 |        |      |      |        |        |     |      |         |
|---------------------------|---------------------------------|--------|------|------|--------|--------|-----|------|---------|
| 143 Crowned Eagle         | <i>Stephanoaetus coronatus</i>  | Culmen | 20   | 183  | 33.2   | 33.1   | 220 | 4655 | Unknown |
|                           |                                 | Tarsus | 70   | 82   | 75.5   | 3.5    | 232 | 4655 | Unknown |
|                           |                                 | Tail   | 77   | 214  | 189.4  | 28.8   | 474 | 4655 | No      |
|                           |                                 | Mass   | 2423 | 4170 | 3239   | 762.8  | 5   | 262  | Unknown |
|                           |                                 | Wing   | 451  | 495  | 470.6  | 17.9   | 7   | 262  | Unknown |
|                           |                                 | Head   | 107  | 113  | 109.6  | 3.6    | 3   | 262  | Unknown |
|                           |                                 | Culmen | 42   | 52   | 48.8   | 4.5    | 5   | 262  | Unknown |
|                           |                                 | Tarsus | 105  | 107  | 105.9  | 1.3    | 2   | 262  | Unknown |
| 163 Dark Chanting Goshawk | <i>Melierax metabates</i>       | Tail   | 316  | 343  | 325.4  | 11.5   | 5   | 262  | Unknown |
|                           |                                 | Mass   | 462  | 810  | 632.6  | 102    | 352 | 591  | Yes     |
|                           |                                 | Wing   | 291  | 620  | 323.5  | 60.4   | 228 | 591  | No      |
|                           |                                 | Head   | 69   | 203  | 82.5   | 32.2   | 78  | 591  | Unknown |
|                           |                                 | Culmen | 17   | 34   | 23.1   | 8.9    | 77  | 591  | Unknown |
|                           |                                 | Tarsus | 80   | 94   | 87.6   | 3.9    | 99  | 591  | Unknown |
| 155 Forest Buzzard        | <i>Buteo trizonatus</i>         | Tail   | 85   | 236  | 200.7  | 31.7   | 136 | 591  | No      |
|                           |                                 | Mass   | 481  | 847  | 646.9  | 94.1   | 89  | 149  | Unknown |
|                           |                                 | Wing   | 328  | 416  | 359    | 41.5   | 84  | 149  | Unknown |
|                           |                                 | Head   | 72   | 80   | 76     | 2.4    | 54  | 149  | Unknown |
|                           |                                 | Culmen | 22   | 33   | 30.1   | 2.9    | 53  | 149  | Unknown |
|                           |                                 | Tarsus | 63   | 81   | 71.3   | 5.6    | 59  | 149  | Unknown |
| 162 Gabar Goshawk         | <i>Micronisus gabar</i>         | Tail   | 129  | 204  | 176.3  | 21.7   | 68  | 149  | Unknown |
|                           |                                 | Tail   | 146  | 177  | 162.7  | 10.4   | 50  | 343  | Unknown |
|                           |                                 | Mass   | 117  | 297  | 188.8  | 163.6  | 152 | 343  | No      |
|                           |                                 | Wing   | 157  | 217  | 195.9  | 18.1   | 96  | 343  | Unknown |
|                           |                                 | Head   | 44   | 61   | 49.9   | 17     | 37  | 343  | Unknown |
|                           |                                 | Culmen | 13   | 28   | 17.5   | 4.5    | 35  | 343  | Unknown |
| 110 Hooded Vulture        | <i>Necrosyrtes monachus</i>     | Tarsus | 45   | 55   | 50.4   | 3      | 35  | 343  | Unknown |
|                           |                                 | Mass   | 1545 | 2554 | 2099.3 | 261    | 26  | 96   | Unknown |
|                           |                                 | Wing   | 374  | 516  | 445    | 106.1  | 2   | 96   | Unknown |
| 152 Jackal Buzzard        | <i>Buteo rufofuscus</i>         | Mass   | 848  | 1362 | 1075.1 | 140.9  | 861 | 2362 | Yes     |
|                           |                                 | Wing   | 383  | 451  | 416.8  | 18.8   | 625 | 2362 | Yes     |
|                           |                                 | Head   | 83   | 96   | 89.2   | 3.6    | 374 | 2362 | Unknown |
|                           |                                 | Culmen | 25   | 42   | 32.9   | 5.7    | 371 | 2362 | Unknown |
|                           |                                 | Tarsus | 80   | 101  | 90.3   | 5.8    | 337 | 2362 | Unknown |
|                           |                                 | Tail   | 149  | 202  | 177.1  | 12.6   | 416 | 2362 | No      |
| 108 Lappet-faced Vulture  | <i>Torgos tracheliotos</i>      | Mass   | 751  | 7946 | 6404.2 | 1521.7 | 42  | 2385 | Unknown |
|                           |                                 | Wing   | 633  | 779  | 725    | 49.1   | 8   | 2385 | Unknown |
|                           |                                 | Tail   | 310  | 349  | 329.5  | 29     | 2   | 2385 | Unknown |
| 158 Little Sparrowhawk    | <i>Accipiter minullus</i>       | Culmen | 9    | 19   | 13     | 3.4    | 55  | 349  | Unknown |
|                           |                                 | Mass   | 66   | 131  | 94.9   | 59.3   | 167 | 349  | Yes     |
|                           |                                 | Wing   | 133  | 169  | 149    | 13.6   | 138 | 349  | Yes     |
|                           |                                 | Head   | 32   | 67   | 40.2   | 11.4   | 55  | 349  | Unknown |
|                           |                                 | Tarsus | 40   | 49   | 43.8   | 2.5    | 43  | 349  | Unknown |
|                           |                                 | Tail   | 97   | 130  | 114.2  | 13.1   | 69  | 349  | Yes     |
| 144 Lizard Buzzard        | <i>Kaupifalco monogrammicus</i> | Mass   | 57   | 399  | 304.2  | 65.8   | 299 | 640  | No      |



|                                 |                              |        |      |      |        |       |      |      |         |
|---------------------------------|------------------------------|--------|------|------|--------|-------|------|------|---------|
| 138 Long-crested Eagle          | <i>Lophaetus occipitalis</i> | Wing   | 216  | 305  | 236.8  | 22.6  | 211  | 640  | No      |
|                                 |                              | Head   | 58   | 152  | 71.7   | 30.4  | 106  | 640  | Unknown |
|                                 |                              | Culmen | 16   | 86   | 24.1   | 21.6  | 109  | 640  | Unknown |
|                                 |                              | Tarsus | 50   | 60   | 55.6   | 9.3   | 80   | 640  | Unknown |
|                                 |                              | Tail   | 51   | 237  | 147.3  | 34.3  | 136  | 640  | No      |
|                                 |                              | Mass   | 852  | 1316 | 1068   | 132.9 | 225  | 371  | Yes     |
|                                 |                              | Wing   | 366  | 421  | 393.7  | 19    | 193  | 371  | No      |
|                                 |                              | Culmen | 27   | 44   | 35     | 6.1   | 100  | 371  | Unknown |
|                                 |                              | Tarsus | 39   | 110  | 95.7   | 15.4  | 106  | 371  | Unknown |
|                                 |                              | Tail   | 187  | 224  | 207    | 14.4  | 122  | 371  | Yes     |
| 142 Martial Eagle               | <i>Polemaetus bellicosus</i> | Head   | 89   | 107  | 95.1   | 8.3   | 87   | 371  | Unknown |
|                                 |                              | Mass   | 1074 | 5175 | 3849.8 | 1066  | 61   | 297  | Yes     |
|                                 |                              | Wing   | 453  | 2955 | 755.7  | 701.3 | 43   | 297  | No      |
|                                 |                              | Head   | 119  | 129  | 123.8  | 3.2   | 13   | 297  | Unknown |
|                                 |                              | Culmen | 42   | 52   | 46.5   | 3.2   | 15   | 297  | Unknown |
|                                 |                              | Tarsus | 116  | 135  | 125.7  | 6.2   | 15   | 297  | Unknown |
|                                 |                              | Tail   | 255  | 316  | 287.5  | 18    | 22   | 297  | Unknown |
|                                 |                              | Culmen | 18   | 75   | 27.8   | 16.1  | 1355 | 8583 | Unknown |
|                                 |                              | Tarsus | 93   | 116  | 103.6  | 8.4   | 1068 | 8583 | Unknown |
|                                 |                              | Mass   | 550  | 1020 | 765    | 134.1 | 5312 | 8583 | Yes     |
| 165 Pale Chanting Goshawk       | <i>Melierax canorus</i>      | Wing   | 320  | 396  | 361.8  | 55.7  | 3275 | 8583 | Yes     |
|                                 |                              | Head   | 68   | 83   | 77.4   | 21.2  | 1367 | 8583 | Unknown |
|                                 |                              | Tail   | 107  | 267  | 233.9  | 29.4  | 1671 | 8583 | Yes     |
|                                 |                              | Mass   | 131  | 227  | 171.8  | 41.3  | 17   | 46   | Unknown |
|                                 |                              | Wing   | 196  | 240  | 215.2  | 16.8  | 11   | 46   | Unknown |
|                                 |                              | Mass   | 92   | 173  | 129.1  | 21.2  | 232  | 469  | No      |
|                                 |                              | Wing   | 161  | 203  | 188.4  | 13.2  | 165  | 469  | Yes     |
|                                 |                              | Culmen | 11   | 19   | 13.8   | 3.2   | 32   | 469  | Unknown |
|                                 |                              | Head   | 42   | 47   | 44.5   | 1.7   | 33   | 469  | Unknown |
|                                 |                              | Tarsus | 43   | 50   | 46.7   | 1.7   | 51   | 469  | Unknown |
| 156 Rufous-breasted Sparrowhawk | <i>Accipiter rufiventris</i> | Tail   | 123  | 153  | 140.8  | 9.2   | 73   | 469  | Yes     |
|                                 |                              | Mass   | 763  | 2998 | 2274.7 | 567.6 | 59   | 317  | Yes     |
|                                 |                              | Wing   | 489  | 687  | 541.4  | 53.7  | 32   | 317  | Unknown |
|                                 |                              | Head   | 105  | 234  | 130.5  | 54.7  | 7    | 317  | Unknown |
|                                 |                              | Culmen | 38   | 53   | 41.4   | 6.1   | 7    | 317  | Unknown |
|                                 |                              | Tarsus | 93   | 102  | 97.9   | 3.9   | 5    | 317  | Unknown |
|                                 |                              | Tail   | 256  | 320  | 276.8  | 19.6  | 14   | 317  | Unknown |
|                                 |                              | Mass   | 3118 | 5412 | 3940.3 | 589   | 48   | 463  | No      |
|                                 |                              | Wing   | 584  | 660  | 618.3  | 21.3  | 24   | 463  | Unknown |
|                                 |                              | Head   | 112  | 125  | 116.9  | 3.5   | 15   | 463  | Unknown |
| 161 Shikra                      | <i>Accipiter badius</i>      | Culmen | 41   | 58   | 46.1   | 6     | 17   | 463  | Unknown |
|                                 |                              | Tarsus | 135  | 301  | 218    | 123   | 2    | 463  | Unknown |
|                                 |                              | Tail   | 274  | 322  | 298.7  | 14.8  | 14   | 463  | Unknown |
|                                 |                              | Culmen | 24   | 41   | 27.5   | 5.3   | 18   | 462  | Unknown |
|                                 |                              | Mass   | 801  | 1513 | 1146.7 | 211.9 | 175  | 462  | Yes     |
| 134 Tawny Eagle                 | <i>Aquila rapax</i>          | Wing   | 216  | 305  | 236.8  | 22.6  | 211  | 640  | No      |
|                                 |                              | Head   | 58   | 152  | 71.7   | 30.4  | 106  | 640  | Unknown |
|                                 |                              | Culmen | 16   | 86   | 24.1   | 21.6  | 109  | 640  | Unknown |
|                                 |                              | Tarsus | 50   | 60   | 55.6   | 9.3   | 80   | 640  | Unknown |
|                                 |                              | Tail   | 51   | 237  | 147.3  | 34.3  | 136  | 640  | No      |
|                                 |                              | Mass   | 852  | 1316 | 1068   | 132.9 | 225  | 371  | Yes     |
|                                 |                              | Wing   | 366  | 421  | 393.7  | 19    | 193  | 371  | No      |
|                                 |                              | Culmen | 27   | 44   | 35     | 6.1   | 100  | 371  | Unknown |
|                                 |                              | Tarsus | 39   | 110  | 95.7   | 15.4  | 106  | 371  | Unknown |
|                                 |                              | Tail   | 187  | 224  | 207    | 14.4  | 122  | 371  | Yes     |
| 137 Wahlberg's Eagle            | <i>Hieraaetus wahlbergi</i>  | Head   | 89   | 107  | 95.1   | 8.3   | 87   | 371  | Unknown |
|                                 |                              | Mass   | 1074 | 5175 | 3849.8 | 1066  | 61   | 297  | Yes     |
|                                 |                              | Wing   | 453  | 2955 | 755.7  | 701.3 | 43   | 297  | No      |
|                                 |                              | Head   | 119  | 129  | 123.8  | 3.2   | 13   | 297  | Unknown |
|                                 |                              | Culmen | 42   | 52   | 46.5   | 3.2   | 15   | 297  | Unknown |
|                                 |                              | Tarsus | 116  | 135  | 125.7  | 6.2   | 15   | 297  | Unknown |
|                                 |                              | Tail   | 255  | 316  | 287.5  | 18    | 22   | 297  | Unknown |
|                                 |                              | Culmen | 18   | 75   | 27.8   | 16.1  | 1355 | 8583 | Unknown |
|                                 |                              | Tarsus | 93   | 116  | 103.6  | 8.4   | 1068 | 8583 | Unknown |
|                                 |                              | Mass   | 550  | 1020 | 765    | 134.1 | 5312 | 8583 | Yes     |

|            |                                                            |                                                      |        |      |      |        |       |      |      |         |
|------------|------------------------------------------------------------|------------------------------------------------------|--------|------|------|--------|-------|------|------|---------|
| Falconidae | 148 Western Banded Snake Eagle<br>107 White-backed Vulture | <i>Circaetus cinerascens</i>                         | Wing   | 395  | 1082 | 452    | 145.1 | 97   | 462  | No      |
|            |                                                            |                                                      | Head   | 87   | 95   | 89.9   | 2.7   | 20   | 462  | Unknown |
|            |                                                            |                                                      | Tarsus | 59   | 83   | 74.4   | 10.1  | 35   | 462  | Unknown |
|            |                                                            |                                                      | Tail   | 167  | 244  | 223    | 21    | 44   | 462  | Unknown |
|            |                                                            |                                                      | Mass   | 1132 | 1470 | 1315.2 | 152.6 | 6    | 16   | Unknown |
|            |                                                            | <i>Gyps africanus</i>                                | Mass   | 3862 | 6500 | 5231.2 | 900.5 | 179  | 6164 | No      |
|            |                                                            |                                                      | Wing   | 582  | 1017 | 647.6  | 103.9 | 142  | 6164 | No      |
|            |                                                            |                                                      | Head   | 128  | 147  | 136.6  | 6.2   | 27   | 6164 | Unknown |
|            |                                                            |                                                      | Culmen | 45   | 53   | 47.9   | 1.9   | 26   | 6164 | Unknown |
|            |                                                            |                                                      | Tarsus | 91   | 114  | 103.6  | 6.3   | 26   | 6164 | Unknown |
|            | 129 Yellow-billed Kite                                     | <i>Milvus aegyptius</i>                              | Tail   | 234  | 298  | 261.6  | 18.4  | 34   | 6164 | Unknown |
|            |                                                            |                                                      | Mass   | 529  | 879  | 689.6  | 94.5  | 66   | 365  | Unknown |
|            |                                                            |                                                      | Wing   | 351  | 451  | 412.4  | 34.8  | 75   | 365  | Unknown |
|            |                                                            |                                                      | Head   | 69   | 80   | 74     | 3.2   | 23   | 365  | Unknown |
|            |                                                            |                                                      | Culmen | 23   | 38   | 30.7   | 5.1   | 37   | 365  | Unknown |
|            | 119 Amur Falcon                                            | <i>Falco amurensis</i>                               | Tarsus | 7    | 56   | 46.2   | 15.6  | 23   | 365  | Unknown |
|            |                                                            |                                                      | Tail   | 180  | 262  | 235    | 33    | 35   | 365  | Unknown |
|            |                                                            |                                                      | Mass   | 112  | 177  | 142.2  | 16.8  | 367  | 550  | Yes     |
|            |                                                            |                                                      | Wing   | 213  | 249  | 233.6  | 7.8   | 367  | 550  | Yes     |
|            |                                                            |                                                      | Head   | 40   | 45   | 42.9   | 1.2   | 267  | 550  | Unknown |
|            | 121 Dickinson's Kestrel<br>122 Greater Kestrel             | <i>Falco dickinsoni</i><br><i>Falco rupicoloides</i> | Culmen | 11   | 17   | 12.9   | 1.3   | 265  | 550  | Unknown |
|            |                                                            |                                                      | Tarsus | 26   | 35   | 30.1   | 2.1   | 282  | 550  | Unknown |
|            |                                                            |                                                      | Tail   | 114  | 142  | 127.4  | 6.8   | 312  | 550  | No      |
|            |                                                            |                                                      | Mass   | 173  | 243  | 216.4  | 21.9  | 22   | 48   | Unknown |
|            |                                                            |                                                      | Mass   | 210  | 318  | 260.2  | 28.8  | 1169 | 1986 | Yes     |
|            | 114 Lanner Falcon                                          | <i>Falco biarmicus</i>                               | Culmen | 15   | 24   | 18.7   | 4.1   | 369  | 1986 | Unknown |
|            |                                                            |                                                      | Tarsus | 43   | 55   | 49.7   | 6.2   | 361  | 1986 | Unknown |
|            |                                                            |                                                      | Tail   | 142  | 175  | 158.9  | 14    | 499  | 1986 | Yes     |
|            |                                                            |                                                      | Wing   | 256  | 301  | 281.6  | 15.3  | 799  | 1986 | Yes     |
|            |                                                            |                                                      | Head   | 51   | 58   | 54.8   | 7.9   | 361  | 1986 | Unknown |
|            | 125 Lesser Kestrel                                         | <i>Falco naumanni</i>                                | Mass   | 399  | 802  | 607.6  | 103.9 | 289  | 878  | Yes     |
|            |                                                            |                                                      | Wing   | 299  | 367  | 335.2  | 49    | 163  | 878  | Yes     |
|            |                                                            |                                                      | Head   | 63   | 76   | 67.5   | 6.3   | 49   | 878  | Unknown |
|            |                                                            |                                                      | Culmen | 18   | 33   | 23.2   | 4.6   | 56   | 878  | Unknown |
|            |                                                            |                                                      | Tarsus | 46   | 62   | 53.3   | 6.4   | 70   | 878  | Unknown |
|            | 113 Peregrine Falcon                                       | <i>Falco peregrinus</i>                              | Tail   | 54   | 232  | 174.5  | 37    | 91   | 878  | No      |
|            |                                                            |                                                      | Mass   | 100  | 190  | 137.4  | 23.4  | 122  | 370  | No      |
|            |                                                            |                                                      | Wing   | 221  | 253  | 236.3  | 12.8  | 93   | 370  | No      |
|            |                                                            |                                                      | Head   | 42   | 49   | 44.3   | 2     | 14   | 370  | Unknown |
|            |                                                            |                                                      | Culmen | 13   | 18   | 14.6   | 1.7   | 14   | 370  | Unknown |
|            | 126 Pygmy Falcon                                           | <i>Polihierax semitorquatus</i>                      | Tarsus | 31   | 36   | 33.4   | 1.8   | 20   | 370  | Unknown |
|            |                                                            |                                                      | Tail   | 139  | 157  | 148    | 6.1   | 28   | 370  | Unknown |
|            |                                                            |                                                      | Mass   | 431  | 840  | 639.9  | 133.2 | 87   | 992  | Yes     |
|            |                                                            |                                                      | Wing   | 275  | 335  | 312.1  | 19.7  | 29   | 992  | Unknown |
|            |                                                            |                                                      | Mass   | 49   | 70   | 57.7   | 4.9   | 540  | 1288 | Yes     |

|             |               |                         |                                 |        |       |      |        |       |         |      |         |
|-------------|---------------|-------------------------|---------------------------------|--------|-------|------|--------|-------|---------|------|---------|
| Galliformes | Sagittariidae | 120 Red-footed Falcon   | <i>Falco vespertinus</i>        | Wing   | 113   | 122  | 117.9  | 2.3   | 408     | 1288 | Yes     |
|             |               |                         |                                 | Head   | 33    | 60   | 38     | 9.9   | 10      | 1288 | Unknown |
|             |               |                         |                                 | Culmen | 10    | 16   | 11.6   | 1.9   | 16      | 1288 | Unknown |
|             |               |                         |                                 | Tarsus | 29    | 47   | 34.8   | 4.7   | 107     | 1288 | Unknown |
|             |               |                         |                                 | Tail   | 67    | 81   | 71.8   | 5.5   | 116     | 1288 | No      |
|             |               |                         |                                 | Mass   | 125   | 174  | 144.6  | 15.9  | 16      | 34   | Unknown |
|             |               |                         |                                 | Wing   | 228   | 248  | 237.5  | 6.9   | 13      | 34   | Unknown |
|             |               |                         |                                 | Head   | 43    | 44   | 43.8   | 0.3   | 7       | 34   | Unknown |
|             |               |                         |                                 | Culmen | 12    | 13   | 12.6   | 0.5   | 8       | 34   | Unknown |
|             |               |                         |                                 | Tarsus | 28    | 30   | 29.1   | 0.9   | 10      | 34   | Unknown |
|             |               |                         |                                 | Tail   | 119   | 132  | 125.9  | 4.6   | 11      | 34   | Unknown |
|             |               | 117 Red-necked Falcon   | <i>Falco chicquera</i>          | Mass   | 171   | 250  | 211.9  | 29.3  | 17      | 78   | Unknown |
|             |               | 123 Rock Kestrel        | <i>Falco rupicolus</i>          | Head   | 19    | 54   | 49.8   | 12.2  | 191     | 1807 | Unknown |
|             |               | Culmen                  | 13                              | 49     | 20.1  | 17.7 | 190    | 1807  | Unknown |      |         |
|             |               | Tail                    | 135                             | 170    | 150.8 | 18.7 | 248    | 1807  | No      |      |         |
|             | Numididae     | 105 Secretarybird       | <i>Sagittarius serpentarius</i> | Mass   | 150   | 250  | 195.6  | 25.4  | 807     | 1807 | No      |
|             |               |                         |                                 | Wing   | 183   | 264  | 240.5  | 22.7  | 493     | 1807 | Yes     |
|             |               |                         |                                 | Tarsus | 37    | 49   | 42.9   | 3     | 151     | 1807 | Unknown |
|             |               |                         |                                 | Mass   | 1683  | 4965 | 3740   | 966.2 | 25      | 414  | Unknown |
|             |               |                         |                                 | Wing   | 533   | 630  | 579.8  | 36.4  | 6       | 414  | Unknown |
|             |               |                         |                                 | Head   | 124   | 124  | 124.2  | NA    | 1       | 414  | Unknown |
|             |               |                         |                                 | Culmen | 43    | 51   | 46.5   | 3.6   | 4       | 414  | Unknown |
|             |               |                         |                                 | Tarsus | 285   | 305  | 292.6  | 8.7   | 5       | 414  | Unknown |
|             |               |                         |                                 | Tail   | 526   | 606  | 551.6  | 37.8  | 5       | 414  | Unknown |
|             |               | 193 Crested Guineafowl  | <i>Guttera pucherani</i>        | Mass   | 275   | 1464 | 1166.8 | 452.7 | 8       | 14   | Unknown |
|             |               |                         |                                 | Wing   | 263   | 949  | 372.3  | 278.3 | 9       | 14   | Unknown |
|             |               |                         |                                 | Head   | 71    | 124  | 84.2   | 25.2  | 5       | 14   | Unknown |
|             |               |                         |                                 | Culmen | 23    | 26   | 24.8   | 1.2   | 5       | 14   | Unknown |
|             |               |                         |                                 | Tarsus | 73    | 73   | 73.3   | 0     | 2       | 14   | Unknown |
|             |               |                         |                                 | Tail   | 144   | 242  | 170.5  | 53    | 4       | 14   | Unknown |
|             | Phasianidae   | 192 Helmeted Guineafowl | <i>Numida meleagris</i>         | Head   | 61    | 154  | 70.1   | 19.9  | 101     | 3052 | Unknown |
|             |               |                         |                                 | Culmen | 21    | 85   | 32.5   | 25.5  | 107     | 3052 | Unknown |
|             |               |                         |                                 | Tarsus | 36    | 97   | 75.4   | 13.3  | 75      | 3052 | Unknown |
|             |               |                         |                                 | Tail   | 25    | 182  | 147.9  | 36.8  | 103     | 3052 | Unknown |
|             |               |                         |                                 | Mass   | 421   | 1682 | 1271.7 | 283.5 | 512     | 3052 | Yes     |
|             |               |                         |                                 | Wing   | 177   | 298  | 269.9  | 35.5  | 231     | 3052 | No      |
|             |               | 181 Cape Spurfowl       | <i>Pternistis capensis</i>      | Mass   | 504   | 1054 | 775.2  | 164.3 | 75      | 310  | Yes     |
|             |               |                         |                                 | Wing   | 157   | 230  | 208.5  | 19.8  | 79      | 310  | No      |
|             |               |                         |                                 | Head   | 57    | 73   | 63.8   | 5.2   | 30      | 310  | Unknown |
|             |               |                         |                                 | Culmen | 19    | 36   | 29     | 4.7   | 31      | 310  | Unknown |
|             |               |                         |                                 | Tarsus | 46    | 71   | 64.1   | 8     | 17      | 310  | Unknown |
|             |               |                         |                                 | Tail   | 93    | 126  | 109.4  | 8.7   | 24      | 310  | Unknown |
|             |               | 189 Common Quail        | <i>Coturnix coturnix</i>        | Wing   | 97    | 110  | 104.2  | 3.8   | 516     | 597  | No      |
|             |               |                         |                                 | Head   | 32    | 36   | 34.2   | 1.6   | 9       | 597  | Unknown |
|             |               |                         |                                 | Culmen | 12    | 15   | 13.4   | 1.4   | 8       | 597  | Unknown |

|                            |                               |        |     |     |       |       |     |     |         |
|----------------------------|-------------------------------|--------|-----|-----|-------|-------|-----|-----|---------|
| 174 Crested Francolin      | <i>Dendroperdix sephaena</i>  | Tail   | 33  | 36  | 34.5  | 1.3   | 4   | 597 | Unknown |
|                            |                               | Mass   | 76  | 102 | 88.4  | 7.4   | 517 | 597 | Yes     |
|                            |                               | Tarsus | 23  | 26  | 25    | 1.3   | 5   | 597 | Unknown |
|                            |                               | Head   | 48  | 60  | 54.2  | 7.8   | 102 | 298 | Unknown |
|                            |                               | Culmen | 21  | 30  | 25.1  | 2.2   | 105 | 298 | Unknown |
|                            |                               | Tarsus | 39  | 54  | 49.4  | 40.4  | 88  | 298 | Unknown |
| 176 Grey-winged Francolin  | <i>Scleroptila afra</i>       | Tail   | 75  | 110 | 94    | 10.2  | 112 | 298 | No      |
|                            |                               | Mass   | 196 | 447 | 352   | 60.5  | 220 | 298 | No      |
|                            |                               | Wing   | 142 | 172 | 159.3 | 19.9  | 208 | 298 | No      |
|                            |                               | Mass   | 388 | 519 | 461.9 | 45    | 10  | 19  | Unknown |
|                            |                               | Wing   | 157 | 174 | 165   | 5.7   | 8   | 19  | Unknown |
|                            |                               | Head   | 58  | 63  | 59.8  | 2.6   | 5   | 19  | Unknown |
| 190 Harlequin Quail        | <i>Coturnix delegorguei</i>   | Culmen | 27  | 34  | 30.2  | 2.7   | 7   | 19  | Unknown |
|                            |                               | Tarsus | 40  | 46  | 43.3  | 2.5   | 6   | 19  | Unknown |
|                            |                               | Tail   | 76  | 84  | 81    | 4.1   | 4   | 19  | Unknown |
|                            |                               | Mass   | 25  | 102 | 78.2  | 18.3  | 31  | 123 | No      |
|                            |                               | Wing   | 77  | 104 | 95.4  | 7.5   | 26  | 123 | Unknown |
|                            |                               | Head   | 31  | 36  | 33.5  | 1.6   | 11  | 123 | Unknown |
| 183 Natal Spurfowl         | <i>Pternistis natalensis</i>  | Culmen | 12  | 15  | 13.3  | 0.9   | 12  | 123 | Unknown |
|                            |                               | Tarsus | 25  | 27  | 25.4  | 0.9   | 6   | 123 | Unknown |
|                            |                               | Tail   | 30  | 93  | 42.1  | 23.9  | 12  | 123 | Unknown |
|                            |                               | Mass   | 197 | 590 | 450.1 | 94.7  | 123 | 223 | Yes     |
|                            |                               | Wing   | 158 | 188 | 173.2 | 8.7   | 116 | 223 | Yes     |
|                            |                               | Head   | 52  | 61  | 56.3  | 2.6   | 55  | 223 | Unknown |
| 179 Orange River Francolin | <i>Scleroptila gutturalis</i> | Culmen | 18  | 29  | 24.6  | 3.8   | 55  | 223 | Unknown |
|                            |                               | Tarsus | 44  | 58  | 49.3  | 3.9   | 44  | 223 | Unknown |
|                            |                               | Tail   | 83  | 105 | 93    | 6.2   | 74  | 223 | Yes     |
|                            |                               | Mass   | 371 | 483 | 420.1 | 40.7  | 12  | 21  | Unknown |
|                            |                               | Wing   | 160 | 172 | 167.2 | 4.6   | 9   | 21  | Unknown |
|                            |                               | Head   | 57  | 58  | 57.1  | 0.8   | 2   | 21  | Unknown |
| 182 Red-billed Spurfowl    | <i>Pternistis adspersus</i>   | Culmen | 31  | 32  | 31.6  | 0.7   | 2   | 21  | Unknown |
|                            |                               | Tarsus | 41  | 41  | 41.3  | 0.3   | 2   | 21  | Unknown |
|                            |                               | Tail   | 78  | 79  | 78.5  | 0.7   | 2   | 21  | Unknown |
|                            |                               | Mass   | 195 | 643 | 463.7 | 123.1 | 76  | 126 | Yes     |
|                            |                               | Wing   | 120 | 196 | 175.9 | 16.4  | 83  | 126 | Yes     |
|                            |                               | Head   | 39  | 66  | 56.3  | 5.9   | 35  | 126 | Unknown |
| 185 Swainson's Spurfowl    | <i>Pternistis swainsonii</i>  | Culmen | 21  | 34  | 28.8  | 3.4   | 39  | 126 | Unknown |
|                            |                               | Tarsus | 34  | 57  | 48.3  | 6.7   | 24  | 126 | Unknown |
|                            |                               | Tail   | 64  | 116 | 92.7  | 18.3  | 46  | 126 | Yes     |
|                            |                               | Mass   | 264 | 850 | 596   | 144.7 | 141 | 376 | Yes     |
|                            |                               | Wing   | 167 | 209 | 189.7 | 12.5  | 98  | 376 | Yes     |
|                            |                               | Head   | 55  | 69  | 61.9  | 3.7   | 47  | 376 | Unknown |
|                            |                               | Culmen | 20  | 40  | 28.7  | 6.5   | 50  | 376 | Unknown |
|                            |                               | Tarsus | 51  | 66  | 58.5  | 4.9   | 38  | 376 | Unknown |
|                            |                               | Tail   | 68  | 96  | 80.6  | 7.3   | 56  | 376 | Yes     |

|            |          |                             |                                   |        |      |      |        |        |     |      |         |
|------------|----------|-----------------------------|-----------------------------------|--------|------|------|--------|--------|-----|------|---------|
| Gruiformes | Gruidae  | 216 Blue Crane              | <i>Grus paradisea</i>             | Mass   | 2638 | 4819 | 3897.7 | 815.8  | 11  | 1526 | Unknown |
|            |          |                             |                                   | Wing   | 338  | 582  | 456.9  | 91.8   | 7   | 1526 | Unknown |
|            |          |                             |                                   | Culmen | 91   | 96   | 93     | 2.6    | 3   | 1526 | Unknown |
|            |          |                             |                                   | Tail   | 215  | 240  | 228.5  | 11.3   | 4   | 1526 | Unknown |
|            | Otididae | 217 Kori Bustard            | <i>Ardeotis kori</i>              | Mass   | 612  | 8232 | 4932.4 | 2373.8 | 58  | 140  | Yes     |
|            |          |                             |                                   | Wing   | 572  | 766  | 650.8  | 59.5   | 50  | 140  | Yes     |
|            |          |                             |                                   | Culmen | 90   | 90   | 89.5   | NA     | 1   | 140  | Unknown |
|            |          |                             |                                   | Tail   | 340  | 340  | 340    | NA     | 1   | 140  | Unknown |
|            |          | 218 Ludwig's Bustard        | <i>Neotis ludwigii</i>            | Mass   | 1945 | 5648 | 3817.7 | 1241.4 | 28  | 34   | Unknown |
|            |          |                             |                                   | Wing   | 448  | 580  | 506.3  | 47.1   | 28  | 34   | Unknown |
|            |          | 1035 Northern Black Korhaan | <i>Afrotis afraoides</i>          | Mass   | 286  | 871  | 746.8  | 114.3  | 110 | 140  | No      |
|            |          |                             |                                   | Wing   | 256  | 290  | 273.3  | 9      | 95  | 140  | Yes     |
|            |          |                             |                                   | Head   | 83   | 87   | 84.6   | 1.7    | 6   | 140  | Unknown |
|            |          |                             |                                   | Culmen | 35   | 41   | 37.8   | 2.4    | 6   | 140  | Unknown |
|            |          |                             |                                   | Tarsus | 90   | 93   | 91.6   | 1.4    | 4   | 140  | Unknown |
|            |          |                             |                                   | Tail   | 123  | 136  | 128.8  | 5.9    | 5   | 140  | Unknown |
|            |          | 224 Red-crested Korhaan     | <i>Lophotis ruficrista</i>        | Mass   | 89   | 914  | 720.2  | 190.7  | 126 | 146  | No      |
|            |          |                             |                                   | Wing   | 251  | 827  | 315.3  | 151.9  | 114 | 146  | No      |
|            |          |                             |                                   | Head   | 86   | 216  | 103.4  | 35.9   | 61  | 146  | Unknown |
|            |          |                             |                                   | Culmen | 38   | 87   | 46.2   | 10.5   | 56  | 146  | Unknown |
|            |          |                             |                                   | Tarsus | 81   | 129  | 88.8   | 11.4   | 46  | 146  | Unknown |
|            |          |                             |                                   | Tail   | 95   | 271  | 152.7  | 43.7   | 68  | 146  | Yes     |
|            | Rallidae | 221 Rüppell's Korhaan       | <i>Eupodotis rueppellii</i>       | Mass   | 914  | 1299 | 1109.8 | 129.2  | 48  | 75   | Yes     |
|            |          |                             |                                   | Wing   | 301  | 350  | 322.6  | 13.7   | 51  | 75   | Yes     |
|            |          | 199 African Crane           | <i>Crex egregia</i>               | Mass   | 120  | 138  | 126.8  | 9      | 4   | 30   | Unknown |
|            |          |                             |                                   | Wing   | 125  | 127  | 125.7  | 1.2    | 3   | 30   | Unknown |
|            |          |                             |                                   | Head   | 50   | 50   | 50.3   | NA     | 1   | 30   | Unknown |
|            |          |                             |                                   | Tarsus | 40   | 40   | 39.5   | NA     | 1   | 30   | Unknown |
|            |          |                             |                                   | Tail   | 39   | 39   | 39     | NA     | 1   | 30   | Unknown |
|            |          | 197 African Rail            | <i>Rallus caerulescens</i>        | Mass   | 115  | 180  | 148.4  | 16.2   | 41  | 112  | Unknown |
|            |          |                             |                                   | Wing   | 114  | 125  | 120.3  | 4.2    | 13  | 112  | Unknown |
|            |          |                             |                                   | Head   | 77   | 85   | 80.9   | 3.3    | 5   | 112  | Unknown |
|            |          |                             |                                   | Culmen | 47   | 52   | 48.8   | 2.2    | 5   | 112  | Unknown |
|            |          |                             |                                   | Tarsus | 44   | 46   | 44.7   | 0.9    | 5   | 112  | Unknown |
|            |          | 208 African Swamphen        | <i>Porphyrio madagascariensis</i> | Tail   | 44   | 54   | 47.6   | 3.9    | 7   | 112  | Unknown |
|            |          |                             |                                   | Mass   | 83   | 780  | 564.7  | 150    | 42  | 168  | Unknown |
|            |          |                             |                                   | Wing   | 230  | 258  | 244    | 9.2    | 17  | 168  | Unknown |
|            |          |                             |                                   | Head   | 78   | 80   | 79     | 0.9    | 4   | 168  | Unknown |
|            |          |                             |                                   | Culmen | 65   | 67   | 65.8   | 1      | 4   | 168  | Unknown |
|            |          |                             |                                   | Tarsus | 91   | 98   | 93.9   | 3      | 5   | 168  | Unknown |
|            |          | 209 Allen's Gallinule       | <i>Porphyrio alleni</i>           | Tail   | 83   | 95   | 89.3   | 4.6    | 6   | 168  | Unknown |
|            |          |                             |                                   | Mass   | 120  | 176  | 148.1  | 15.2   | 31  | 46   | Unknown |
|            |          |                             |                                   | Wing   | 146  | 160  | 152.5  | 4.3    | 30  | 46   | Unknown |
|            |          |                             |                                   | Culmen | 28   | 28   | 27.7   | NA     | 1   | 46   | Unknown |
|            |          |                             |                                   | Tail   | 60   | 69   | 65.2   | 3.8    | 4   | 46   | Unknown |

|                 |              |                               |                                |        |     |      |       |       |      |       |         |
|-----------------|--------------|-------------------------------|--------------------------------|--------|-----|------|-------|-------|------|-------|---------|
|                 |              | 202 Baillon's Crane           | <i>Porzana pusilla</i>         | Mass   | 39  | 41   | 39.8  | 0.8   | 6    | 26    | Unknown |
|                 |              |                               |                                | Wing   | 81  | 87   | 83.6  | 2.7   | 5    | 26    | Unknown |
|                 |              | 203 Black Crane               | <i>Amaurornis flavirostra</i>  | Mass   | 64  | 110  | 87.3  | 12.2  | 308  | 617   | Yes     |
|                 |              |                               |                                | Wing   | 96  | 113  | 103.7 | 4.7   | 226  | 617   | Yes     |
|                 |              |                               |                                | Head   | 46  | 57   | 50.6  | 2.8   | 81   | 617   | Unknown |
|                 |              |                               |                                | Culmen | 22  | 30   | 25.6  | 4.9   | 84   | 617   | Unknown |
|                 |              |                               |                                | Tarsus | 38  | 48   | 43    | 2.8   | 67   | 617   | Unknown |
|                 |              |                               |                                | Tail   | 35  | 50   | 43.3  | 4.1   | 97   | 617   | Unknown |
|                 |              | 206 Buff-spotted Flufftail    | <i>Sarothrura elegans</i>      | Mass   | 35  | 55   | 46.7  | 5.1   | 56   | 155   | No      |
|                 |              |                               |                                | Wing   | 84  | 93   | 89.4  | 2.5   | 51   | 155   | No      |
|                 |              |                               |                                | Head   | 36  | 39   | 37.3  | 0.8   | 12   | 155   | Unknown |
|                 |              |                               |                                | Culmen | 14  | 18   | 15.4  | 1.1   | 16   | 155   | Unknown |
|                 |              |                               |                                | Tarsus | 26  | 27   | 26.5  | 0.7   | 13   | 155   | Unknown |
|                 |              |                               |                                | Tail   | 38  | 42   | 39.9  | 1.1   | 14   | 155   | Unknown |
|                 |              | 210 Common Moorhen            | <i>Gallinula chloropus</i>     | Mass   | 187 | 353  | 268   | 42.6  | 159  | 372   | Unknown |
|                 |              |                               |                                | Wing   | 149 | 180  | 166.3 | 10.5  | 111  | 372   | Unknown |
|                 |              |                               |                                | Head   | 55  | 79   | 60.8  | 9.3   | 46   | 372   | Unknown |
|                 |              |                               |                                | Culmen | 35  | 50   | 40.7  | 4.3   | 53   | 372   | Unknown |
|                 |              |                               |                                | Tarsus | 45  | 62   | 50.7  | 4.3   | 38   | 372   | Unknown |
|                 |              |                               |                                | Tail   | 62  | 79   | 71.5  | 4.3   | 40   | 372   | Unknown |
|                 |              | 198 Corn Crane                | <i>Crex crex</i>               | Mass   | 114 | 148  | 134.4 | 19.5  | 3    | 18    | Unknown |
|                 |              |                               |                                | Wing   | 140 | 141  | 140.5 | 0.7   | 2    | 18    | Unknown |
|                 |              | 211 Lesser Moorhen            | <i>Paragallinula angulata</i>  | Mass   | 112 | 146  | 128   | 11.4  | 8    | 40    | Unknown |
|                 |              |                               |                                | Wing   | 130 | 138  | 135.3 | 4.6   | 3    | 40    | Unknown |
|                 |              | 205 Red-chested Flufftail     | <i>Sarothrura rufa</i>         | Mass   | 28  | 46   | 38    | 4.8   | 28   | 47    | Unknown |
|                 |              |                               |                                | Wing   | 71  | 80   | 75.9  | 2.8   | 14   | 47    | Unknown |
|                 |              |                               |                                | Head   | 32  | 33   | 32.8  | 0.4   | 7    | 47    | Unknown |
|                 |              |                               |                                | Culmen | 13  | 15   | 13.7  | 0.8   | 7    | 47    | Unknown |
|                 |              |                               |                                | Tarsus | 24  | 25   | 24.1  | 0.3   | 6    | 47    | Unknown |
|                 |              |                               |                                | Tail   | 45  | 50   | 46.8  | 1.8   | 8    | 47    | Unknown |
|                 |              | 212 Red-knobbed Coot          | <i>Fulica cristata</i>         | Mass   | 504 | 1075 | 764.5 | 144.8 | 2031 | 13119 | Yes     |
|                 |              |                               |                                | Wing   | 161 | 242  | 222.9 | 18.1  | 735  | 13119 | Unknown |
|                 |              |                               |                                | Head   | 62  | 77   | 70.6  | 4.3   | 588  | 13119 | Unknown |
|                 |              |                               |                                | Culmen | 34  | 66   | 56    | 6.5   | 694  | 13119 | Unknown |
|                 |              |                               |                                | Tarsus | 50  | 77   | 67.8  | 6.2   | 567  | 13119 | Unknown |
|                 |              |                               |                                | Tail   | 54  | 72   | 60.7  | 4.8   | 55   | 13119 | Unknown |
| Musophagiformes | Musophagidae | 339 Grey Go-away-bird         | <i>Corythaixoides concolor</i> | Mass   | 166 | 314  | 253.7 | 33.8  | 505  | 655   | Unknown |
|                 |              |                               |                                | Wing   | 170 | 232  | 213.3 | 14.8  | 439  | 655   | Unknown |
|                 |              |                               |                                | Head   | 49  | 199  | 59.4  | 32.6  | 165  | 655   | Unknown |
|                 |              |                               |                                | Culmen | 20  | 41   | 26.2  | 5.3   | 163  | 655   | Unknown |
|                 |              |                               |                                | Tarsus | 35  | 54   | 44.8  | 20.6  | 114  | 655   | Unknown |
|                 |              |                               |                                | Tail   | 28  | 268  | 234.7 | 45.2  | 206  | 655   | Unknown |
|                 |              | 336 Knysna Lourie (pre-split) | <i>Tauraco corythaix</i>       | Mass   | 223 | 342  | 287.1 | 42.3  | 34   | 51    | Unknown |
|                 |              |                               |                                | Wing   | 175 | 202  | 184.8 | 7.7   | 26   | 51    | Unknown |
|                 |              |                               |                                | Head   | 55  | 59   | 57.5  | 1.8   | 4    | 51    | Unknown |

|               |           |                                  |                                    |        |     |     |       |      |     |     |         |
|---------------|-----------|----------------------------------|------------------------------------|--------|-----|-----|-------|------|-----|-----|---------|
| Passeriformes | Alaudidae | 4133 Knysna Turaco               |                                    | Culmen | 22  | 25  | 23.6  | 1.1  | 5   | 51  | Unknown |
|               |           |                                  |                                    | Tail   | 197 | 214 | 207   | 5.9  | 7   | 51  | Unknown |
|               |           |                                  |                                    | Mass   | 256 | 340 | 296.5 | 26.3 | 13  | 18  | Unknown |
|               |           |                                  |                                    | Wing   | 181 | 196 | 188.2 | 5    | 14  | 18  | Unknown |
|               |           |                                  |                                    | Head   | 53  | 59  | 55.6  | 2.5  | 6   | 18  | Unknown |
|               |           |                                  |                                    | Culmen | 19  | 28  | 23.6  | 3    | 8   | 18  | Unknown |
|               |           |                                  |                                    | Tarsus | 45  | 45  | 45.2  | NA   | 1   | 18  | Unknown |
|               |           | 337 Purple-crested Turaco        | <i>Tauraco porphyreolophus</i>     | Tail   | 209 | 219 | 212.8 | 3.8  | 8   | 18  | Unknown |
|               |           |                                  |                                    | Mass   | 218 | 315 | 274.5 | 25.7 | 46  | 107 | Unknown |
|               |           |                                  |                                    | Wing   | 162 | 190 | 178.2 | 7.5  | 45  | 107 | Unknown |
|               |           |                                  |                                    | Head   | 51  | 58  | 55.5  | 1.9  | 16  | 107 | Unknown |
|               |           |                                  |                                    | Culmen | 23  | 30  | 26.2  | 2    | 17  | 107 | Unknown |
|               |           |                                  |                                    | Tarsus | 40  | 48  | 44.1  | 2.6  | 10  | 107 | Unknown |
|               |           |                                  |                                    | Tail   | 168 | 221 | 189.6 | 15.3 | 20  | 107 | Unknown |
|               |           | 484 Chestnut-backed Sparrow-Lark | <i>Eremopterix leucotis</i>        | Mass   | 17  | 21  | 18.6  | 1.2  | 82  | 473 | No      |
|               |           |                                  |                                    | Wing   | 79  | 85  | 82.3  | 1.9  | 66  | 473 | Yes     |
|               |           |                                  |                                    | Head   | 27  | 32  | 28.8  | 1.8  | 5   | 473 | Unknown |
|               |           |                                  |                                    | Culmen | 11  | 13  | 11.9  | 0.9  | 6   | 473 | Unknown |
|               |           |                                  |                                    | Tarsus | 17  | 18  | 17.7  | 0.7  | 5   | 473 | Unknown |
|               |           |                                  |                                    | Tail   | 45  | 48  | 46.2  | 1.2  | 6   | 473 | Unknown |
|               |           |                                  |                                    | Mass   | 24  | 36  | 30.4  | 3    | 88  | 143 | Unknown |
|               |           | 466 Clapper Lark (pre-split)     | <i>Mirafra apiata</i>              | Wing   | 83  | 94  | 88.5  | 3.4  | 15  | 143 | Unknown |
|               |           | 480 Dune Lark                    | <i>Calendulauda erythrochlamys</i> | Mass   | 25  | 31  | 28    | 1.9  | 13  | 75  | Unknown |
|               |           |                                  |                                    | Wing   | 82  | 85  | 83    | 1.7  | 3   | 75  | Unknown |
|               |           | 1183 Eastern Clapper Lark        | <i>Mirafra fasciolata</i>          | Mass   | 25  | 33  | 28.8  | 2.6  | 33  | 41  | Unknown |
|               |           |                                  |                                    | Wing   | 81  | 96  | 89    | 5.1  | 35  | 41  | Unknown |
|               |           |                                  |                                    | Head   | 35  | 48  | 37.9  | 4.2  | 26  | 41  | Unknown |
|               |           |                                  |                                    | Culmen | 15  | 25  | 18.2  | 2.6  | 26  | 41  | Unknown |
|               |           |                                  |                                    | Tarsus | 26  | 29  | 27.2  | 0.9  | 24  | 41  | Unknown |
|               |           |                                  |                                    | Tail   | 39  | 66  | 57.3  | 8.7  | 28  | 41  | Unknown |
|               |           |                                  |                                    | Mass   | 35  | 46  | 41.9  | 4.2  | 9   | 13  | Unknown |
|               |           | 4126 Eastern Long-billed Lark    | <i>Certhilauda semitorquata</i>    | Wing   | 94  | 110 | 104.4 | 6    | 8   | 13  | Unknown |
|               |           |                                  |                                    | Head   | 41  | 49  | 45.7  | 3.4  | 6   | 13  | Unknown |
|               |           |                                  |                                    | Culmen | 20  | 26  | 24.1  | 2.2  | 9   | 13  | Unknown |
|               |           |                                  |                                    | Tarsus | 26  | 30  | 28.3  | 1.3  | 8   | 13  | Unknown |
|               |           |                                  |                                    | Tail   | 66  | 77  | 73.6  | 4.2  | 8   | 13  | Unknown |
|               |           |                                  |                                    | Mass   | 19  | 29  | 24.2  | 2.5  | 173 | 213 | Unknown |
|               |           |                                  |                                    | Wing   | 78  | 95  | 87.2  | 4.5  | 157 | 213 | Unknown |
|               |           | 459 Fawn-colored Lark            | <i>Calendulauda africanoides</i>   | Head   | 33  | 36  | 34.7  | 0.8  | 18  | 213 | Unknown |
|               |           |                                  |                                    | Culmen | 14  | 17  | 15    | 0.9  | 28  | 213 | Unknown |
|               |           |                                  |                                    | Tarsus | 23  | 26  | 24.3  | 1    | 28  | 213 | Unknown |
|               |           |                                  |                                    | Tail   | 48  | 65  | 58.1  | 5.1  | 23  | 213 | Unknown |
|               |           | 468 Flappet Lark                 | <i>Mirafra rufocinnamomea</i>      | Mass   | 23  | 32  | 26    | 2.8  | 12  | 41  | Unknown |
|               |           | 483 Gray's Lark                  | <i>Ammomanopsis grayi</i>          | Wing   | 76  | 82  | 80    | 2.7  | 4   | 41  | Unknown |
|               |           |                                  |                                    | Mass   | 19  | 22  | 21.1  | 1.1  | 6   | 17  | Unknown |

|                              |                                |        |     |     |       |      |     |      |         |
|------------------------------|--------------------------------|--------|-----|-----|-------|------|-----|------|---------|
| 485 Grey-backed Sparrow-Lark | <i>Eremopterix verticalis</i>  | Wing   | 78  | 81  | 79.4  | 1.1  | 5   | 17   | Unknown |
|                              |                                | Head   | 34  | 36  | 34.6  | 0.7  | 6   | 17   | Unknown |
|                              |                                | Culmen | 16  | 18  | 17    | 0.6  | 7   | 17   | Unknown |
|                              |                                | Tarsus | 22  | 22  | 21.6  | 0.1  | 2   | 17   | Unknown |
|                              |                                | Tail   | 45  | 48  | 46.3  | 1.4  | 6   | 17   | Unknown |
|                              |                                | Mass   | 14  | 20  | 16.9  | 1.6  | 840 | 1157 | No      |
|                              |                                | Wing   | 75  | 85  | 79.9  | 2.5  | 537 | 1157 | Yes     |
|                              |                                | Head   | 26  | 29  | 27.9  | 0.7  | 57  | 1157 | Unknown |
|                              |                                | Culmen | 11  | 15  | 13    | 1.4  | 58  | 1157 | Unknown |
|                              |                                | Tarsus | 17  | 19  | 17.6  | 0.6  | 21  | 1157 | Unknown |
| 4127 Karoo Long-billed Lark  | <i>Certhilauda subcoronata</i> | Tail   | 41  | 52  | 46.2  | 2.7  | 108 | 1157 | Yes     |
|                              |                                | Mass   | 28  | 47  | 38.8  | 5.3  | 94  | 108  | Yes     |
|                              |                                | Wing   | 94  | 113 | 105.5 | 5.5  | 95  | 108  | Yes     |
|                              |                                | Head   | 43  | 52  | 48.2  | 2.9  | 95  | 108  | Unknown |
|                              |                                | Culmen | 22  | 30  | 26.3  | 2.3  | 94  | 108  | Unknown |
|                              |                                | Tarsus | 27  | 31  | 29    | 1.8  | 90  | 108  | Unknown |
|                              |                                | Tail   | 67  | 84  | 77.4  | 4.8  | 89  | 108  | Yes     |
| 463 Large-billed Lark        | <i>Galerida magnirostris</i>   | Mass   | 40  | 49  | 43.2  | 3.3  | 8   | 29   | Unknown |
|                              |                                | Wing   | 100 | 107 | 104.3 | 2.8  | 7   | 29   | Unknown |
|                              |                                | Head   | 42  | 45  | 42.9  | 1.6  | 3   | 29   | Unknown |
|                              |                                | Culmen | 18  | 18  | 17.9  | 0.1  | 2   | 29   | Unknown |
|                              |                                | Tarsus | 27  | 27  | 27.1  | 0.3  | 2   | 29   | Unknown |
|                              |                                | Tail   | 64  | 64  | 64    | 0    | 2   | 29   | Unknown |
| 456 Melodious Lark           | <i>Mirafra cheniana</i>        | Mass   | 18  | 23  | 20.1  | 1.3  | 25  | 38   | Unknown |
| 457 Monotonous Lark          | <i>Mirafra passerina</i>       | Wing   | 73  | 73  | 73    | NA   | 1   | 38   | Unknown |
|                              |                                | Mass   | 23  | 26  | 24.1  | 1.2  | 13  | 75   | Unknown |
|                              |                                | Wing   | 78  | 88  | 84.1  | 3    | 12  | 75   | Unknown |
|                              |                                | Head   | 33  | 33  | 33.1  | 0.1  | 4   | 75   | Unknown |
|                              |                                | Culmen | 15  | 18  | 16.7  | 1.1  | 6   | 75   | Unknown |
|                              |                                | Tarsus | 22  | 24  | 22.8  | 0.5  | 5   | 75   | Unknown |
| 490 Pink-billed Lark         | <i>Spizocorys conirostris</i>  | Tail   | 56  | 59  | 57.4  | 1.1  | 5   | 75   | Unknown |
|                              |                                | Mass   | 15  | 20  | 17.8  | 1.4  | 15  | 152  | Unknown |
|                              |                                | Wing   | 70  | 78  | 74.3  | 2.5  | 12  | 152  | Unknown |
|                              |                                | Head   | 26  | 28  | 27.1  | 1.2  | 3   | 152  | Unknown |
|                              |                                | Culmen | 14  | 14  | 13.6  | NA   | 1   | 152  | Unknown |
|                              |                                | Tarsus | 19  | 21  | 20    | 1    | 3   | 152  | Unknown |
| 488 Red-capped Lark          | <i>Calandrella cinerea</i>     | Tail   | 42  | 42  | 42    | 0    | 2   | 152  | Unknown |
|                              |                                | Mass   | 20  | 30  | 25    | 2.5  | 420 | 801  | No      |
|                              |                                | Wing   | 85  | 102 | 94.6  | 4.6  | 268 | 801  | Unknown |
|                              |                                | Head   | 32  | 63  | 35.2  | 7    | 97  | 801  | Unknown |
|                              |                                | Culmen | 10  | 22  | 14.3  | 2.6  | 100 | 801  | Unknown |
|                              |                                | Tarsus | 20  | 33  | 22.5  | 2.8  | 97  | 801  | Unknown |
| 458 Rufous-naped Lark        | <i>Mirafra africana</i>        | Tail   | 16  | 70  | 61.7  | 10.4 | 95  | 801  | Unknown |
|                              |                                | Mass   | 29  | 153 | 48.1  | 21.9 | 299 | 417  | Yes     |
|                              |                                | Wing   | 84  | 104 | 95.4  | 5.4  | 234 | 417  | Yes     |



|               |                             |                                 |        |     |     |       |      |     |      |         |
|---------------|-----------------------------|---------------------------------|--------|-----|-----|-------|------|-----|------|---------|
| Campephagidae | 460 Sabota Lark             | <i>Calendulauda sabota</i>      | Head   | 38  | 60  | 43.6  | 5.1  | 120 | 417  | Unknown |
|               |                             |                                 | Culmen | 17  | 30  | 21.1  | 2.7  | 122 | 417  | Unknown |
|               |                             |                                 | Tarsus | 27  | 42  | 30.8  | 3.3  | 106 | 417  | Unknown |
|               |                             |                                 | Tail   | 22  | 73  | 62.5  | 10.8 | 140 | 417  | Yes     |
|               |                             |                                 | Mass   | 21  | 32  | 25.7  | 2.9  | 774 | 1085 | No      |
|               |                             |                                 | Wing   | 77  | 92  | 85.2  | 4.2  | 628 | 1085 | Yes     |
|               |                             |                                 | Head   | 32  | 40  | 36.7  | 2.6  | 253 | 1085 | Unknown |
|               |                             |                                 | Culmen | 13  | 23  | 17.6  | 2.9  | 265 | 1085 | Unknown |
|               |                             |                                 | Tarsus | 22  | 26  | 23.6  | 1.2  | 218 | 1085 | Unknown |
|               |                             |                                 | Tail   | 47  | 61  | 53    | 4.4  | 303 | 1085 | Yes     |
|               | 474 Spike-heeled Lark       | <i>Chersomanes albofasciata</i> | Mass   | 20  | 34  | 28.2  | 4.1  | 241 | 300  | Yes     |
|               |                             |                                 | Wing   | 75  | 93  | 83.9  | 5.2  | 114 | 300  | Unknown |
|               |                             |                                 | Head   | 36  | 46  | 41.6  | 3.1  | 66  | 300  | Unknown |
|               |                             |                                 | Culmen | 17  | 25  | 21.6  | 2.5  | 67  | 300  | Unknown |
|               |                             |                                 | Tarsus | 25  | 32  | 28.4  | 2.4  | 64  | 300  | Unknown |
|               | 492 Stark's Lark            | <i>Spizocorys starki</i>        | Tail   | 39  | 58  | 47.7  | 5.9  | 78  | 300  | Unknown |
|               |                             |                                 | Mass   | 15  | 20  | 17.3  | 1.4  | 580 | 1649 | No      |
|               |                             |                                 | Wing   | 76  | 87  | 81.4  | 2.9  | 632 | 1649 | Yes     |
|               |                             |                                 | Head   | 29  | 32  | 30.4  | 0.8  | 168 | 1649 | Unknown |
|               |                             |                                 | Culmen | 12  | 16  | 14.8  | 1    | 167 | 1649 | Unknown |
|               | 513 Black Cuckooshrike      | <i>Campephaga flava</i>         | Tarsus | 18  | 21  | 19.6  | 1.1  | 121 | 1649 | Unknown |
|               |                             |                                 | Tail   | 43  | 53  | 47.4  | 2.6  | 523 | 1649 | Yes     |
|               |                             |                                 | Mass   | 28  | 42  | 33.9  | 5.9  | 191 | 304  | Yes     |
|               |                             |                                 | Wing   | 97  | 110 | 102.7 | 8.4  | 167 | 304  | Yes     |
|               |                             |                                 | Head   | 38  | 42  | 40.1  | 0.9  | 50  | 304  | Unknown |
|               |                             |                                 | Culmen | 13  | 21  | 16.7  | 2.4  | 60  | 304  | Unknown |
|               |                             |                                 | Tarsus | 19  | 25  | 20.6  | 2    | 37  | 304  | Unknown |
|               |                             |                                 | Tail   | 56  | 106 | 97.7  | 12.5 | 74  | 304  | No      |
|               | 516 Grey Cuckooshrike       | <i>Coracina caesia</i>          | Mass   | 52  | 60  | 55.7  | 2.9  | 9   | 15   | Unknown |
|               |                             |                                 | Wing   | 124 | 132 | 128.1 | 2.7  | 8   | 15   | Unknown |
|               |                             |                                 | Head   | 51  | 51  | 51    | 0    | 2   | 15   | Unknown |
|               |                             |                                 | Culmen | 21  | 22  | 21.1  | 0.6  | 3   | 15   | Unknown |
|               |                             |                                 | Tail   | 117 | 122 | 119   | 2.6  | 3   | 15   | Unknown |
| Chaetopidae   | 540 Cape Rockjumper         | <i>Chaetops frenatus</i>        | Mass   | 45  | 88  | 56.7  | 9.1  | 102 | 164  | Yes     |
|               |                             |                                 | Wing   | 80  | 96  | 87.6  | 4.1  | 91  | 164  | Yes     |
|               |                             |                                 | Head   | 47  | 53  | 50.1  | 1.8  | 41  | 164  | Unknown |
|               |                             |                                 | Culmen | 18  | 23  | 21.2  | 1.5  | 42  | 164  | Unknown |
|               |                             |                                 | Tarsus | 35  | 40  | 37.5  | 1.3  | 71  | 164  | Unknown |
|               | 1038 Drakensberg Rockjumper | <i>Chaetops aurantius</i>       | Tail   | 87  | 107 | 98    | 5.6  | 65  | 164  | Yes     |
|               |                             |                                 | Head   | 47  | 48  | 47.5  | 0.9  | 4   | 62   | Unknown |
|               |                             |                                 | Culmen | 20  | 22  | 21.4  | 0.9  | 7   | 62   | Unknown |
|               |                             |                                 | Tail   | 86  | 97  | 91.6  | 3.9  | 7   | 62   | Unknown |
|               |                             |                                 | Mass   | 47  | 59  | 53    | 3.9  | 55  | 62   | Yes     |
|               |                             |                                 | Wing   | 82  | 95  | 89    | 3.6  | 55  | 62   | Yes     |
|               |                             |                                 | Tarsus | 39  | 43  | 40.8  | 1.6  | 18  | 62   | Unknown |

|              |                                       |                                 |        |    |    |      |      |      |      |         |
|--------------|---------------------------------------|---------------------------------|--------|----|----|------|------|------|------|---------|
| Cisticolidae | 622 Bar-throated Apalis               | <i>Apalis thoracica</i>         | Mass   | 10 | 13 | 10.9 | 0.9  | 3745 | 5095 | No      |
|              |                                       |                                 | Wing   | 48 | 57 | 52.1 | 2.4  | 3242 | 5095 | Yes     |
|              |                                       |                                 | Head   | 30 | 33 | 31.7 | 0.9  | 771  | 5095 | Unknown |
|              |                                       |                                 | Culmen | 12 | 17 | 14.1 | 1.6  | 902  | 5095 | Unknown |
|              |                                       |                                 | Tarsus | 19 | 22 | 20.8 | 0.8  | 652  | 5095 | Unknown |
|              |                                       |                                 | Tail   | 47 | 61 | 54.5 | 3.7  | 1207 | 5095 | Yes     |
|              | 614 Barred Wren-Warbler               | <i>Calamonastes fasciolatus</i> | Mass   | 10 | 18 | 13.5 | 7    | 349  | 606  | No      |
|              |                                       |                                 | Wing   | 53 | 66 | 59.1 | 5.1  | 318  | 606  | No      |
|              |                                       |                                 | Head   | 30 | 34 | 32.5 | 2.8  | 121  | 606  | Unknown |
|              |                                       |                                 | Culmen | 12 | 19 | 15.7 | 2.6  | 126  | 606  | Unknown |
|              |                                       |                                 | Tarsus | 20 | 24 | 21.8 | 1.1  | 90   | 606  | Unknown |
|              |                                       |                                 | Tail   | 47 | 64 | 54.1 | 4.4  | 153  | 606  | Yes     |
|              | 650 Black-chested Prinia              | <i>Prinia flavicans</i>         | Mass   | 7  | 14 | 10.3 | 8.2  | 4240 | 5297 | No      |
|              |                                       |                                 | Wing   | 48 | 58 | 52.9 | 3.7  | 3042 | 5297 | Yes     |
|              |                                       |                                 | Head   | 26 | 33 | 29.2 | 5.6  | 768  | 5297 | Unknown |
|              |                                       |                                 | Culmen | 10 | 20 | 13.1 | 4.9  | 834  | 5297 | Unknown |
|              |                                       |                                 | Tarsus | 18 | 24 | 21.2 | 1.4  | 686  | 5297 | Unknown |
|              |                                       |                                 | Tail   | 40 | 90 | 68.9 | 12.4 | 1158 | 5297 | Yes     |
|              | 645 Blackbacked Cisticola (pre-split) | <i>Cisticola galactotes</i>     | Mass   | 12 | 59 | 18.3 | 10.4 | 166  | 239  | Unknown |
|              |                                       |                                 | Wing   | 17 | 65 | 55.4 | 11.4 | 137  | 239  | Unknown |
|              |                                       |                                 | Head   | 31 | 43 | 34.4 | 4.7  | 27   | 239  | Unknown |
|              |                                       |                                 | Culmen | 12 | 18 | 14.4 | 1.8  | 29   | 239  | Unknown |
|              |                                       |                                 | Tarsus | 22 | 25 | 23.8 | 1.4  | 4    | 239  | Unknown |
|              |                                       |                                 | Tail   | 36 | 70 | 55.4 | 9.4  | 35   | 239  | Unknown |
|              | 915 Chirping Cisticola                | <i>Cisticola pipiens</i>        | Mass   | 11 | 18 | 14.4 | 2.3  | 39   | 90   | Unknown |
|              |                                       |                                 | Wing   | 55 | 67 | 60.8 | 3.9  | 32   | 90   | Unknown |
|              |                                       |                                 | Head   | 32 | 34 | 32.6 | 0.7  | 20   | 90   | Unknown |
|              |                                       |                                 | Culmen | 15 | 18 | 16.7 | 0.9  | 22   | 90   | Unknown |
|              |                                       |                                 | Tarsus | 22 | 25 | 24.1 | 1    | 22   | 90   | Unknown |
|              |                                       |                                 | Tail   | 54 | 60 | 56.8 | 2.8  | 5    | 90   | Unknown |
|              | 631 Cloud Cisticola                   | <i>Cisticola textrix</i>        | Mass   | 9  | 14 | 11.1 | 1.5  | 159  | 267  | No      |
|              |                                       |                                 | Wing   | 48 | 57 | 53.4 | 2.7  | 106  | 267  | Yes     |
|              |                                       |                                 | Head   | 27 | 30 | 28.3 | 1    | 93   | 267  | Unknown |
|              |                                       |                                 | Culmen | 12 | 15 | 13.3 | 1.4  | 93   | 267  | Unknown |
|              |                                       |                                 | Tarsus | 19 | 23 | 21.3 | 1.3  | 93   | 267  | Unknown |
|              |                                       |                                 | Tail   | 25 | 37 | 29.4 | 3.5  | 89   | 267  | No      |
|              | 647 Croaking Cisticola                | <i>Cisticola natalensis</i>     | Mass   | 15 | 28 | 22.2 | 4.6  | 125  | 233  | Yes     |
|              |                                       |                                 | Wing   | 58 | 76 | 68.3 | 5.9  | 115  | 233  | Yes     |
|              |                                       |                                 | Head   | 31 | 37 | 33.9 | 2    | 35   | 233  | Unknown |
|              |                                       |                                 | Culmen | 13 | 18 | 15.3 | 1.4  | 45   | 233  | Unknown |
|              |                                       |                                 | Tarsus | 23 | 29 | 26.2 | 2.2  | 32   | 233  | Unknown |
|              |                                       |                                 | Tail   | 46 | 70 | 56.6 | 7.7  | 47   | 233  | Unknown |
|              | 630 Desert Cisticola                  | <i>Cisticola aridulus</i>       | Mass   | 7  | 12 | 8.7  | 1.1  | 223  | 351  | Yes     |
|              |                                       |                                 | Wing   | 46 | 56 | 50.8 | 2.7  | 160  | 351  | Yes     |
|              |                                       |                                 | Head   | 25 | 30 | 27.2 | 1.9  | 79   | 351  | Unknown |

|                             |                                 |        |    |    |      |      |      |       |         |
|-----------------------------|---------------------------------|--------|----|----|------|------|------|-------|---------|
| 1049 Drakensberg Prinia     | <i>Prinia hypoxantha</i>        | Culmen | 10 | 20 | 13.2 | 2.8  | 83   | 351   | Unknown |
|                             |                                 | Tarsus | 18 | 23 | 19.5 | 1.4  | 80   | 351   | Unknown |
|                             |                                 | Tail   | 29 | 46 | 38   | 5    | 86   | 351   | Yes     |
|                             |                                 | Culmen | 9  | 16 | 12.9 | 4    | 266  | 502   | Unknown |
|                             |                                 | Tarsus | 20 | 26 | 22.9 | 6.3  | 184  | 502   | Unknown |
|                             |                                 | Mass   | 9  | 13 | 10.7 | 4.9  | 442  | 502   | Yes     |
|                             |                                 | Wing   | 49 | 57 | 53   | 3.2  | 446  | 502   | Yes     |
|                             |                                 | Head   | 28 | 32 | 29.8 | 2.1  | 197  | 502   | Unknown |
|                             |                                 | Tail   | 36 | 86 | 68.1 | 10.6 | 287  | 502   | No      |
| 628 Grey-backed Camaroptera | <i>Camaroptera brevicaudata</i> | Mass   | 9  | 13 | 11.1 | 4.2  | 1087 | 1821  | No      |
|                             |                                 | Wing   | 48 | 59 | 53.9 | 3.3  | 1058 | 1821  | Yes     |
|                             |                                 | Head   | 30 | 34 | 31.5 | 1.8  | 404  | 1821  | Unknown |
|                             |                                 | Culmen | 12 | 21 | 15   | 2.2  | 433  | 1821  | Unknown |
|                             |                                 | Tarsus | 20 | 25 | 22   | 1.7  | 306  | 1821  | Unknown |
| 638 Grey-backed Cisticola   | <i>Cisticola subruficapilla</i> | Tail   | 34 | 50 | 41.6 | 5    | 608  | 1821  | Yes     |
|                             |                                 | Mass   | 8  | 14 | 11.1 | 4.7  | 444  | 791   | No      |
|                             |                                 | Wing   | 47 | 59 | 53   | 5.6  | 343  | 791   | Unknown |
|                             |                                 | Head   | 12 | 32 | 28.9 | 4.9  | 61   | 791   | Unknown |
|                             |                                 | Culmen | 9  | 15 | 11.8 | 5    | 66   | 791   | Unknown |
| 4139 Karoo Prinia           | <i>Prinia maculosa</i>          | Tarsus | 17 | 21 | 18.9 | 0.9  | 53   | 791   | Unknown |
|                             |                                 | Tail   | 47 | 62 | 55.2 | 4.2  | 121  | 791   | Unknown |
|                             |                                 | Tarsus | 20 | 25 | 22   | 1.5  | 492  | 5566  | Unknown |
|                             |                                 | Tail   | 36 | 82 | 67.6 | 9.2  | 1359 | 5566  | Yes     |
|                             |                                 | Mass   | 8  | 13 | 9.7  | 3.3  | 3614 | 5566  | No      |
|                             |                                 | Wing   | 46 | 56 | 51.2 | 5.4  | 2895 | 5566  | Yes     |
|                             |                                 | Head   | 25 | 31 | 28.7 | 2.8  | 490  | 5566  | Unknown |
|                             |                                 | Culmen | 9  | 14 | 11.2 | 5.4  | 581  | 5566  | Unknown |
|                             |                                 | Mass   | 9  | 17 | 13.1 | 2.6  | 483  | 636   | No      |
| 648 Lazy Cisticola          | <i>Cisticola aberrans</i>       | Wing   | 45 | 57 | 51.2 | 3.5  | 448  | 636   | Yes     |
|                             |                                 | Head   | 17 | 33 | 30.6 | 4.3  | 144  | 636   | Unknown |
|                             |                                 | Culmen | 10 | 22 | 13.9 | 6.3  | 165  | 636   | Unknown |
|                             |                                 | Tarsus | 18 | 24 | 21.3 | 1.4  | 88   | 636   | Unknown |
|                             |                                 | Tail   | 42 | 73 | 61.9 | 9.1  | 184  | 636   | Unknown |
| 646 Levallant's Cisticola   | <i>Cisticola tinniens</i>       | Mass   | 9  | 14 | 11.3 | 2.9  | 8937 | 11605 | No      |
|                             |                                 | Wing   | 48 | 59 | 53.5 | 3.3  | 7852 | 11605 | Yes     |
|                             |                                 | Head   | 27 | 51 | 29.7 | 4.6  | 1664 | 11605 | Unknown |
|                             |                                 | Culmen | 10 | 17 | 12.7 | 2    | 1936 | 11605 | Unknown |
|                             |                                 | Tarsus | 18 | 28 | 21.1 | 3.3  | 1371 | 11605 | Unknown |
| 653 Namaqua Warbler         | <i>Phragmacia substriata</i>    | Tail   | 45 | 68 | 57.6 | 6.6  | 3707 | 11605 | Yes     |
|                             |                                 | Mass   | 9  | 17 | 11.2 | 2    | 74   | 92    | Unknown |
|                             |                                 | Wing   | 50 | 58 | 54.2 | 2.3  | 54   | 92    | Unknown |
|                             |                                 | Head   | 29 | 31 | 30.1 | 0.7  | 4    | 92    | Unknown |
|                             |                                 | Culmen | 11 | 13 | 11.5 | 0.9  | 11   | 92    | Unknown |
|                             |                                 | Tarsus | 22 | 23 | 22.2 | 0.7  | 4    | 92    | Unknown |
|                             |                                 | Tail   | 51 | 74 | 67.5 | 7.3  | 14   | 92    | Unknown |

|                              |                                |        |    |    |      |      |      |      |         |
|------------------------------|--------------------------------|--------|----|----|------|------|------|------|---------|
| 637 Neddicky                 | <i>Cisticola fulvicapilla</i>  | Mass   | 8  | 16 | 10.9 | 9.3  | 3385 | 4389 | No      |
|                              |                                | Wing   | 45 | 55 | 49.9 | 2.5  | 2526 | 4389 | Yes     |
|                              |                                | Head   | 26 | 30 | 27.8 | 0.9  | 764  | 4389 | Unknown |
|                              |                                | Culmen | 9  | 15 | 11.8 | 1.6  | 859  | 4389 | Unknown |
|                              |                                | Tarsus | 17 | 23 | 18.9 | 1.8  | 582  | 4389 | Unknown |
|                              |                                | Tail   | 38 | 51 | 44.4 | 3.4  | 1021 | 4389 | Yes     |
| 635 Pale-crowned Cisticola   | <i>Cisticola cinnamomeus</i>   | Mass   | 8  | 12 | 9.7  | 1    | 97   | 126  | Yes     |
|                              |                                | Wing   | 47 | 56 | 52.5 | 2.6  | 93   | 126  | Yes     |
|                              |                                | Head   | 26 | 29 | 27.1 | 0.8  | 50   | 126  | Unknown |
|                              |                                | Culmen | 10 | 13 | 12.2 | 0.8  | 50   | 126  | Unknown |
|                              |                                | Tarsus | 19 | 22 | 20.8 | 1    | 48   | 126  | Unknown |
|                              |                                | Tail   | 30 | 39 | 33.9 | 2.7  | 50   | 126  | Unknown |
| 642 Rattling Cisticola       | <i>Cisticola chiniana</i>      | Mass   | 11 | 22 | 16.3 | 5.3  | 2128 | 3288 | No      |
|                              |                                | Wing   | 50 | 70 | 60.6 | 7.4  | 1797 | 3288 | Yes     |
|                              |                                | Head   | 29 | 48 | 32.8 | 4.9  | 665  | 3288 | Unknown |
|                              |                                | Culmen | 11 | 23 | 14.9 | 2.9  | 691  | 3288 | Unknown |
|                              |                                | Tarsus | 20 | 33 | 24.6 | 16.1 | 534  | 3288 | Unknown |
|                              |                                | Tail   | 30 | 69 | 57.3 | 8.7  | 801  | 3288 | Yes     |
| 644 Red-faced Cisticola      | <i>Cisticola erythrops</i>     | Mass   | 11 | 17 | 14.4 | 1.7  | 418  | 917  | Yes     |
|                              |                                | Wing   | 49 | 60 | 54.4 | 3.1  | 377  | 917  | Yes     |
|                              |                                | Head   | 30 | 35 | 32.7 | 2.7  | 152  | 917  | Unknown |
|                              |                                | Culmen | 12 | 17 | 14.9 | 1.4  | 167  | 917  | Unknown |
|                              |                                | Tarsus | 21 | 25 | 22.9 | 1.4  | 102  | 917  | Unknown |
|                              |                                | Tail   | 46 | 64 | 55.4 | 5.3  | 191  | 917  | Yes     |
| 620 Red-winged Warbler       | <i>Heliolais erythropterus</i> | Mass   | 13 | 13 | 12.7 | 0.3  | 2    | 56   | Unknown |
|                              |                                | Wing   | 50 | 50 | 50.2 | 0.4  | 2    | 56   | Unknown |
| 916 Roberts's Warbler        | <i>Oreophilais robertsi</i>    | Mass   | 8  | 11 | 9.4  | 0.9  | 72   | 133  | Unknown |
|                              |                                | Wing   | 48 | 53 | 50.8 | 1.5  | 18   | 133  | Unknown |
|                              |                                | Head   | 30 | 30 | 30.1 | 0.3  | 6    | 133  | Unknown |
|                              |                                | Culmen | 12 | 15 | 13.9 | 0.9  | 7    | 133  | Unknown |
|                              |                                | Tarsus | 21 | 22 | 21.8 | 0.4  | 7    | 133  | Unknown |
|                              |                                | Tail   | 55 | 63 | 59.8 | 3    | 5    | 133  | Unknown |
| 624 Rudd's Apalis            | <i>Apalis ruddi</i>            | Mass   | 8  | 12 | 10.3 | 4.7  | 213  | 265  | Yes     |
|                              |                                | Wing   | 45 | 53 | 48.6 | 3.9  | 188  | 265  | Yes     |
|                              |                                | Head   | 28 | 31 | 30.2 | 0.9  | 56   | 265  | Unknown |
|                              |                                | Culmen | 11 | 16 | 13.1 | 1.4  | 83   | 265  | Unknown |
|                              |                                | Tarsus | 18 | 22 | 20   | 0.9  | 27   | 265  | Unknown |
|                              |                                | Tail   | 46 | 63 | 54.5 | 4.9  | 98   | 265  | Yes     |
| 619 Rufous-eared Warbler     | <i>Malcorus pectoralis</i>     | Mass   | 9  | 11 | 10   | 0.7  | 38   | 53   | Unknown |
|                              |                                | Wing   | 47 | 51 | 48.5 | 1.4  | 22   | 53   | Unknown |
|                              |                                | Head   | 28 | 29 | 28.6 | 0.1  | 5    | 53   | Unknown |
|                              |                                | Culmen | 11 | 14 | 12.7 | 1.2  | 11   | 53   | Unknown |
|                              |                                | Tarsus | 19 | 21 | 19.7 | 0.6  | 11   | 53   | Unknown |
|                              |                                | Tail   | 70 | 79 | 75   | 3.7  | 4    | 53   | Unknown |
| 4138 Rufous-winged Cisticola | <i>Cisticola galactotes</i>    | Mass   | 12 | 19 | 15.3 | 2.1  | 192  | 224  | Unknown |

|                              |                                |        |    |    |      |      |      |      |         |
|------------------------------|--------------------------------|--------|----|----|------|------|------|------|---------|
| 636 Short-winged Cisticola   | <i>Cisticola brachypterus</i>  | Wing   | 51 | 65 | 58.7 | 4.4  | 188  | 224  | Unknown |
|                              |                                | Head   | 32 | 53 | 34.7 | 4.6  | 108  | 224  | Unknown |
|                              |                                | Culmen | 12 | 17 | 15   | 1.6  | 111  | 224  | Unknown |
|                              |                                | Tarsus | 22 | 26 | 24.1 | 1.1  | 15   | 224  | Unknown |
|                              |                                | Tail   | 48 | 72 | 59.4 | 6.7  | 161  | 224  | Unknown |
|                              |                                | Mass   | 8  | 9  | 8.3  | 0.4  | 32   | 121  | Unknown |
|                              |                                | Wing   | 45 | 51 | 48.2 | 1.9  | 31   | 121  | Unknown |
|                              |                                | Head   | 26 | 27 | 26.6 | 0.5  | 29   | 121  | Unknown |
|                              |                                | Culmen | 13 | 14 | 13.2 | 0.5  | 29   | 121  | Unknown |
|                              |                                | Tarsus | 18 | 20 | 18.9 | 0.6  | 29   | 121  | Unknown |
| 643 Singing Cisticola        | <i>Cisticola cantans</i>       | Tail   | 37 | 43 | 38.9 | 2.2  | 27   | 121  | Unknown |
|                              |                                | Mass   | 10 | 15 | 12.1 | 1.4  | 73   | 191  | Yes     |
| 615 Stierling's Wren-Warbler | <i>Calamonastes stierlingi</i> | Wing   | 50 | 60 | 54.9 | 4.4  | 8    | 191  | Unknown |
|                              |                                | Mass   | 11 | 15 | 12.8 | 1.3  | 34   | 64   | Unknown |
|                              |                                | Wing   | 56 | 65 | 61.1 | 3.1  | 25   | 64   | Unknown |
|                              |                                | Head   | 30 | 33 | 31   | 0.9  | 15   | 64   | Unknown |
|                              |                                | Culmen | 13 | 16 | 14.8 | 0.8  | 12   | 64   | Unknown |
| 649 Tawny-flanked Prinia     | <i>Prinia subflava</i>         | Tarsus | 20 | 23 | 21   | 0.8  | 14   | 64   | Unknown |
|                              |                                | Tail   | 46 | 55 | 49.2 | 3    | 16   | 64   | Unknown |
|                              |                                | Mass   | 8  | 11 | 9.2  | 0.9  | 4905 | 7426 | Yes     |
|                              |                                | Wing   | 46 | 55 | 50.5 | 2.3  | 3892 | 7426 | Yes     |
|                              |                                | Head   | 27 | 31 | 28.9 | 1.4  | 1398 | 7426 | Unknown |
|                              |                                | Culmen | 10 | 16 | 12.5 | 1.7  | 1550 | 7426 | Unknown |
|                              |                                | Tarsus | 19 | 24 | 21.2 | 1.1  | 1052 | 7426 | Unknown |
|                              |                                | Tail   | 48 | 80 | 64.6 | 9    | 1879 | 7426 | Yes     |
|                              |                                | Mass   | 10 | 18 | 12.7 | 1.8  | 40   | 91   | Unknown |
|                              |                                | Wing   | 13 | 61 | 52.9 | 10.5 | 35   | 91   | Unknown |
| 641 Tinkling Cisticola       | <i>Cisticola rufilatus</i>     | Tail   | 48 | 57 | 52   | 2.8  | 15   | 91   | Unknown |
|                              |                                | Mass   | 10 | 19 | 13.9 | 2.6  | 218  | 344  | No      |
| 639 Wailing Cisticola        | <i>Cisticola lais</i>          | Wing   | 50 | 66 | 58.3 | 5.1  | 172  | 344  | Yes     |
|                              |                                | Head   | 28 | 33 | 30.6 | 1.5  | 75   | 344  | Unknown |
|                              |                                | Culmen | 10 | 16 | 13   | 1.5  | 82   | 344  | Unknown |
|                              |                                | Tarsus | 19 | 24 | 21.3 | 1.5  | 61   | 344  | Unknown |
|                              |                                | Tail   | 44 | 66 | 53.6 | 7.1  | 92   | 344  | Yes     |
|                              |                                | Mass   | 7  | 12 | 9.4  | 1    | 117  | 182  | Yes     |
| 634 Wing-snapping Cisticola  | <i>Cisticola ayresii</i>       | Wing   | 44 | 52 | 49   | 2.4  | 104  | 182  | Yes     |
|                              |                                | Head   | 25 | 28 | 26.5 | 1.3  | 78   | 182  | Unknown |
|                              |                                | Culmen | 10 | 19 | 12.2 | 1.9  | 84   | 182  | Unknown |
|                              |                                | Tarsus | 18 | 20 | 19.3 | 0.7  | 76   | 182  | Unknown |
|                              |                                | Tail   | 24 | 33 | 27.3 | 3    | 73   | 182  | Yes     |
|                              |                                | Mass   | 7  | 10 | 8.1  | 0.7  | 601  | 843  | Yes     |
| 625 Yellow-breasted Apalis   | <i>Apalis flavida</i>          | Wing   | 45 | 53 | 49.3 | 2.1  | 485  | 843  | Yes     |
|                              |                                | Head   | 27 | 31 | 29   | 0.9  | 174  | 843  | Unknown |
|                              |                                | Culmen | 11 | 16 | 13.3 | 1.3  | 190  | 843  | Unknown |
|                              |                                | Tarsus | 18 | 22 | 19.6 | 1.1  | 108  | 843  | Unknown |

|             |                          |                               |        |     |     |       |       |       |       |         |
|-------------|--------------------------|-------------------------------|--------|-----|-----|-------|-------|-------|-------|---------|
| Corvidae    | 629 Zitting Cisticola    | <i>Cisticola juncidis</i>     | Tail   | 42  | 57  | 50.1  | 4.6   | 222   | 843   | Yes     |
|             |                          |                               | Mass   | 7   | 12  | 9.4   | 6.8   | 448   | 704   | No      |
|             |                          |                               | Wing   | 45  | 55  | 50.4  | 2.7   | 368   | 704   | Yes     |
|             |                          |                               | Head   | 25  | 30  | 26.2  | 1.4   | 216   | 704   | Unknown |
|             |                          |                               | Culmen | 10  | 14  | 11.8  | 1.4   | 227   | 704   | Unknown |
|             | 523 Cape Crow            | <i>Corvus capensis</i>        | Tarsus | 17  | 26  | 19.3  | 1.6   | 199   | 704   | Unknown |
|             |                          |                               | Tail   | 31  | 47  | 37.9  | 5.4   | 238   | 704   | No      |
|             |                          |                               | Mass   | 354 | 801 | 641.5 | 194.6 | 6     | 52    | Unknown |
|             |                          |                               | Wing   | 332 | 356 | 347.3 | 14.2  | 3     | 52    | Unknown |
|             |                          |                               | Head   | 96  | 98  | 96.7  | 0.8   | 3     | 135   | Unknown |
| Dicruridae  | 522 Pied Crow            | <i>Corvus albus</i>           | Culmen | 56  | 58  | 57    | 0.9   | 4     | 135   | Unknown |
|             |                          |                               | Tarsus | 61  | 61  | 61.4  | NA    | 1     | NA    | Unknown |
|             |                          |                               | Tail   | 173 | 184 | 179.5 | 5.3   | 4     | 135   | Unknown |
|             | 517 Fork-tailed Drongo   | <i>Dicrurus adsimilis</i>     | Mass   | 35  | 63  | 48.8  | 9.2   | 1702  | 2888  | No      |
|             |                          |                               | Wing   | 112 | 143 | 131.7 | 10.8  | 1407  | 2888  | No      |
|             |                          |                               | Head   | 42  | 53  | 47.8  | 9.4   | 514   | 2888  | Unknown |
|             |                          |                               | Culmen | 17  | 28  | 22.7  | 5.7   | 516   | 2888  | Unknown |
|             |                          |                               | Tarsus | 20  | 26  | 21.9  | 2.3   | 450   | 2888  | Unknown |
|             | 518 Square-tailed Drongo | <i>Dicrurus ludwigii</i>      | Tail   | 87  | 130 | 115.1 | 14.8  | 616   | 2888  | No      |
|             |                          |                               | Mass   | 22  | 34  | 26.9  | 7.8   | 185   | 276   | Yes     |
|             |                          |                               | Wing   | 93  | 108 | 99.6  | 8.9   | 163   | 276   | No      |
|             |                          |                               | Head   | 29  | 42  | 39.6  | 4.1   | 62    | 276   | Unknown |
|             |                          |                               | Culmen | 14  | 54  | 21.3  | 11.7  | 70    | 276   | Unknown |
| Estrildidae | 833 African Firefinch    | <i>Lagonosticta rubricata</i> | Tarsus | 16  | 19  | 17.3  | 1     | 33    | 276   | Unknown |
|             |                          |                               | Tail   | 75  | 96  | 87.4  | 11.1  | 94    | 276   | Unknown |
|             |                          |                               | Mass   | 8   | 12  | 10.3  | 5     | 2507  | 3380  | No      |
|             |                          |                               | Wing   | 45  | 52  | 48.3  | 2.8   | 1847  | 3380  | Yes     |
|             |                          |                               | Head   | 21  | 27  | 24.2  | 2.6   | 482   | 3380  | Unknown |
|             | 841 Black-faced Waxbill  | <i>Estrilda erythronotos</i>  | Culmen | 9   | 17  | 11.1  | 2.4   | 516   | 3380  | Unknown |
|             |                          |                               | Tarsus | 13  | 17  | 14.8  | 1.1   | 290   | 3380  | Unknown |
|             |                          |                               | Tail   | 39  | 49  | 44.3  | 2.6   | 610   | 3380  | Yes     |
|             |                          |                               | Mass   | 8   | 12  | 9.8   | 5.3   | 3948  | 5191  | No      |
|             |                          |                               | Wing   | 49  | 57  | 52.9  | 5.3   | 3181  | 5191  | No      |
|             | 839 Blue Waxbill         | <i>Uraeginthus angolensis</i> | Head   | 20  | 24  | 22.6  | 2     | 323   | 5191  | Unknown |
|             |                          |                               | Culmen | 9   | 14  | 11.2  | 5.6   | 332   | 5191  | Unknown |
|             |                          |                               | Tarsus | 13  | 18  | 15.8  | 9.1   | 245   | 5191  | Unknown |
|             |                          |                               | Tail   | 40  | 66  | 58.9  | 7.6   | 592   | 5191  | No      |
|             |                          |                               | Mass   | 9   | 11  | 9.9   | 0.7   | 21168 | 32357 | Yes     |
|             |                          |                               | Wing   | 49  | 55  | 52.4  | 1.6   | 15229 | 32357 | Yes     |
|             |                          |                               | Head   | 22  | 27  | 24    | 3.2   | 2957  | 32357 | Unknown |
|             |                          |                               | Culmen | 9   | 12  | 10.3  | 0.9   | 2984  | 32357 | Unknown |
|             |                          |                               | Tarsus | 13  | 17  | 14.7  | 1.1   | 2338  | 32357 | Unknown |
|             |                          |                               | Tail   | 46  | 59  | 53.1  | 3.3   | 5031  | 32357 | Yes     |

|                          |                              |        |    |    |      |      |       |       |         |
|--------------------------|------------------------------|--------|----|----|------|------|-------|-------|---------|
| 823 Bronze Mannikin      | <i>Lonchura cucullata</i>    | Culmen | 9  | 12 | 10.1 | 1.6  | 2850  | 23417 | Unknown |
|                          |                              | Mass   | 8  | 12 | 10.1 | 2.5  | 12961 | 23417 | No      |
|                          |                              | Wing   | 46 | 53 | 49.4 | 4    | 8427  | 23417 | No      |
|                          |                              | Head   | 20 | 23 | 21.5 | 1.7  | 2328  | 23417 | Unknown |
|                          |                              | Tarsus | 11 | 15 | 13   | 1.1  | 1404  | 23417 | Unknown |
|                          |                              | Tail   | 28 | 36 | 32.5 | 2.5  | 3831  | 23417 | No      |
| 836 Brown Firefinch      | <i>Lagonosticta nitidula</i> | Culmen | 10 | 11 | 10.4 | 0.6  | 18    | 346   | Unknown |
|                          |                              | Mass   | 8  | 49 | 12.1 | 8.3  | 193   | 346   | No      |
|                          |                              | Wing   | 10 | 54 | 48.4 | 9.9  | 143   | 346   | No      |
|                          |                              | Head   | 23 | 24 | 23.4 | 0.2  | 5     | 346   | Unknown |
|                          |                              | Tarsus | 11 | 15 | 13   | 1.5  | 19    | 346   | Unknown |
|                          |                              | Tail   | 36 | 48 | 42.6 | 2.9  | 30    | 346   | Unknown |
| 920 Cinderella Waxbill   | <i>Estrilda thomensis</i>    | Mass   | 6  | 8  | 7.3  | 0.7  | 25    | 40    | Unknown |
|                          |                              | Wing   | 48 | 52 | 50   | 1.1  | 25    | 40    | Unknown |
|                          |                              | Head   | 21 | 21 | 21.1 | 0.1  | 2     | 40    | Unknown |
|                          |                              | Culmen | 9  | 10 | 9.4  | 0.8  | 2     | 40    | Unknown |
|                          |                              | Tarsus | 13 | 15 | 13.9 | 1.2  | 2     | 40    | Unknown |
|                          |                              | Tail   | 49 | 49 | 49   | NA   | 1     | 40    | Unknown |
| 843 Common Waxbill       | <i>Estrilda astrild</i>      | Mass   | 8  | 10 | 9    | 0.8  | 16009 | 26923 | No      |
|                          |                              | Wing   | 46 | 53 | 49.9 | 1.7  | 12184 | 26923 | Yes     |
|                          |                              | Head   | 20 | 23 | 21.7 | 1.5  | 2313  | 26923 | Unknown |
|                          |                              | Culmen | 8  | 11 | 9.2  | 0.9  | 2379  | 26923 | Unknown |
|                          |                              | Tarsus | 13 | 18 | 15.1 | 1.1  | 1690  | 26923 | Unknown |
|                          |                              | Tail   | 46 | 60 | 54.2 | 3.6  | 4357  | 26923 | Yes     |
| 821 Cut-throat Finch     | <i>Amadina fasciata</i>      | Wing   | 62 | 70 | 66.3 | 2    | 884   | 2134  | Yes     |
|                          |                              | Mass   | 15 | 20 | 17.4 | 1.6  | 1354  | 2134  | No      |
|                          |                              | Head   | 23 | 26 | 24.6 | 0.8  | 642   | 2134  | Unknown |
|                          |                              | Culmen | 9  | 13 | 10.9 | 1    | 636   | 2134  | Unknown |
|                          |                              | Tarsus | 13 | 17 | 14.7 | 1.3  | 555   | 2134  | Unknown |
|                          |                              | Tail   | 35 | 45 | 39.9 | 2.5  | 698   | 2134  | Yes     |
| 830 Green-winged Pytilia | <i>Pytilia melba</i>         | Mass   | 12 | 18 | 15   | 3.7  | 9646  | 14420 | No      |
|                          |                              | Wing   | 54 | 62 | 58.3 | 3.5  | 8033  | 14420 | Yes     |
|                          |                              | Head   | 24 | 47 | 28.2 | 4    | 1714  | 14420 | Unknown |
|                          |                              | Culmen | 11 | 19 | 14   | 7.9  | 1757  | 14420 | Unknown |
|                          |                              | Tarsus | 15 | 22 | 19.9 | 25.5 | 1277  | 14420 | Unknown |
|                          |                              | Tail   | 44 | 57 | 49.5 | 4.8  | 2825  | 14420 | Yes     |
| 827 Green Twinspot       | <i>Mandingoa nitidula</i>    | Mass   | 8  | 12 | 9.8  | 2.4  | 327   | 653   | No      |
|                          |                              | Culmen | 8  | 12 | 10.2 | 2.3  | 117   | 653   | Unknown |
|                          |                              | Wing   | 48 | 55 | 51.8 | 2.9  | 265   | 653   | No      |
|                          |                              | Head   | 22 | 27 | 23.8 | 2.3  | 147   | 653   | Unknown |
|                          |                              | Tarsus | 14 | 18 | 15.6 | 0.9  | 87    | 653   | Unknown |
|                          |                              | Tail   | 28 | 39 | 33.8 | 3.1  | 169   | 653   | No      |
| 842 Grey Waxbill         | <i>Estrilda perreini</i>     | Mass   | 7  | 11 | 8.4  | 3.4  | 166   | 223   | Unknown |
|                          |                              | Head   | 22 | 23 | 22.1 | 0.4  | 46    | 223   | Unknown |
|                          |                              | Culmen | 8  | 16 | 9.2  | 2    | 62    | 223   | Unknown |

|                             |                                 |        |    |     |      |      |      |      |         |
|-----------------------------|---------------------------------|--------|----|-----|------|------|------|------|---------|
| 835 Jameson's Firefinch     | <i>Lagonosticta rhodopareia</i> | Tarsus | 15 | 18  | 15.4 | 0.9  | 29   | 223  | Unknown |
|                             |                                 | Tail   | 46 | 52  | 48.9 | 1.7  | 63   | 223  | Unknown |
|                             |                                 | Wing   | 45 | 52  | 48.8 | 1.7  | 132  | 223  | Unknown |
|                             |                                 | Wing   | 44 | 52  | 47.6 | 2.3  | 2966 | 5752 | Yes     |
|                             |                                 | Head   | 21 | 29  | 23.8 | 2.9  | 849  | 5752 | Unknown |
|                             |                                 | Culmen | 9  | 13  | 11   | 2    | 858  | 5752 | Unknown |
|                             |                                 | Tarsus | 13 | 19  | 14.7 | 3.2  | 600  | 5752 | Unknown |
|                             |                                 | Tail   | 35 | 48  | 42.7 | 4.2  | 1163 | 5752 | Yes     |
| 822 Magpie Mannikin         | <i>Lonchura fringilloides</i>   | Mass   | 8  | 11  | 9.5  | 4.8  | 4172 | 5752 | No      |
|                             |                                 | Mass   | 16 | 22  | 19.1 | 10.2 | 229  | 333  | Unknown |
|                             |                                 | Wing   | 57 | 63  | 60.2 | 1.6  | 220  | 333  | Unknown |
|                             |                                 | Head   | 27 | 39  | 30   | 3.6  | 134  | 333  | Unknown |
|                             |                                 | Culmen | 13 | 18  | 17.6 | 15.5 | 137  | 333  | Unknown |
|                             |                                 | Tarsus | 14 | 282 | 40.1 | 78.4 | 22   | 333  | Unknown |
|                             |                                 | Tail   | 29 | 41  | 37.7 | 14.4 | 142  | 333  | Unknown |
|                             |                                 | Mass   | 7  | 10  | 8.1  | 1.8  | 2323 | 4059 | No      |
| 838 Orange-breasted Waxbill | <i>Amandava subflava</i>        | Wing   | 43 | 48  | 46   | 1.3  | 944  | 4059 | Yes     |
|                             |                                 | Head   | 19 | 22  | 20.4 | 0.9  | 142  | 4059 | Unknown |
|                             |                                 | Culmen | 7  | 10  | 8.7  | 0.8  | 148  | 4059 | Unknown |
|                             |                                 | Tarsus | 11 | 15  | 12.3 | 0.9  | 79   | 4059 | Unknown |
|                             |                                 | Tail   | 31 | 40  | 35.3 | 2.1  | 257  | 4059 | Yes     |
|                             |                                 | Mass   | 14 | 17  | 15.7 | 1.2  | 5    | 110  | Unknown |
|                             |                                 | Wing   | 59 | 59  | 59   | 0    | 2    | 110  | Unknown |
|                             |                                 | Head   | 26 | 26  | 26.1 | 0.3  | 2    | 110  | Unknown |
| 829 Orange-winged Pytilia   | <i>Pytilia afra</i>             | Culmen | 13 | 13  | 13.1 | 0.2  | 3    | 110  | Unknown |
|                             |                                 | Tail   | 37 | 49  | 42   | 7    | 3    | 110  | Unknown |
|                             |                                 | Mass   | 12 | 16  | 13   | 0.9  | 195  | 237  | No      |
|                             |                                 | Wing   | 51 | 57  | 54   | 1.6  | 187  | 237  | Yes     |
|                             |                                 | Head   | 24 | 27  | 25.7 | 0.6  | 61   | 237  | Unknown |
|                             |                                 | Tarsus | 16 | 19  | 17.1 | 0.9  | 34   | 237  | Unknown |
|                             |                                 | Mass   | 12 | 15  | 13   | 0.9  | 206  | 237  | No      |
|                             |                                 | Wing   | 51 | 57  | 54.1 | 1.5  | 196  | 237  | Yes     |
| 844 Quailfinch              | <i>Ortygospiza atricollis</i>   | Head   | 24 | 27  | 25.7 | 0.6  | 62   | 237  | Unknown |
|                             |                                 | Culmen | 10 | 13  | 11.5 | 0.6  | 69   | 237  | Unknown |
|                             |                                 | Tail   | 50 | 58  | 53.1 | 2.3  | 104  | 237  | Yes     |
|                             |                                 | Mass   | 10 | 34  | 12.2 | 4.8  | 867  | 1186 | No      |
|                             |                                 | Wing   | 51 | 58  | 55.1 | 1.8  | 475  | 1186 | Yes     |
|                             |                                 | Head   | 22 | 24  | 22.5 | 0.6  | 129  | 1186 | Unknown |
|                             |                                 | Culmen | 9  | 12  | 10.5 | 1.1  | 135  | 1186 | Unknown |
|                             |                                 | Tarsus | 14 | 16  | 15.1 | 0.8  | 123  | 1186 | Unknown |
| 824 Red-backed Mannikin     | <i>Lonchura nigriceps</i>       | Tail   | 26 | 31  | 28.6 | 1.6  | 151  | 1186 | Yes     |
|                             |                                 | Wing   | 45 | 52  | 48.3 | 4.4  | 1042 | 2968 | Unknown |
|                             |                                 | Head   | 20 | 23  | 21.6 | 0.9  | 316  | 2968 | Unknown |
|                             |                                 | Culmen | 9  | 13  | 10.5 | 2.5  | 390  | 2968 | Unknown |
|                             |                                 | Mass   | 8  | 12  | 10   | 1.4  | 1500 | 2968 | No      |



|              |                            |                                |        |    |    |      |      |       |       |         |
|--------------|----------------------------|--------------------------------|--------|----|----|------|------|-------|-------|---------|
| Eurylaimidae | 837 Red-billed Firefinch   | <i>Lagonosticta senegala</i>   | Tarsus | 12 | 16 | 13.5 | 0.9  | 120   | 2968  | Unknown |
|              |                            |                                | Tail   | 30 | 39 | 33.2 | 2.2  | 536   | 2968  | Unknown |
|              |                            |                                | Mass   | 7  | 11 | 8.9  | 5.8  | 4992  | 8128  | No      |
|              |                            |                                | Wing   | 45 | 52 | 48.4 | 2.7  | 3659  | 8128  | Yes     |
|              |                            |                                | Head   | 20 | 23 | 21.8 | 1.7  | 802   | 8128  | Unknown |
|              |                            |                                | Culmen | 8  | 12 | 9.8  | 1.7  | 884   | 8128  | Unknown |
|              |                            |                                | Tarsus | 11 | 15 | 12.8 | 1.1  | 619   | 8128  | Unknown |
|              | 828 Red-faced Crimsonwing  | <i>Cryptospiza reichenovii</i> | Tail   | 31 | 45 | 36.4 | 3.5  | 1360  | 8128  | Yes     |
|              |                            |                                | Mass   | 12 | 16 | 13.7 | 1.1  | 75    | 329   | Yes     |
|              |                            |                                | Wing   | 56 | 58 | 57   | 0.9  | 17    | 329   | Unknown |
|              |                            |                                | Head   | 27 | 28 | 27.3 | 0.3  | 11    | 329   | Unknown |
|              |                            |                                | Culmen | 11 | 13 | 12.2 | 0.5  | 11    | 329   | Unknown |
|              |                            |                                | Tarsus | 17 | 19 | 18.6 | 0.7  | 11    | 329   | Unknown |
|              |                            |                                | Tail   | 43 | 45 | 44.4 | 0.7  | 8     | 329   | Unknown |
|              | 820 Red-headed Finch       | <i>Amadina erythrocephala</i>  | Mass   | 19 | 26 | 22.6 | 1.8  | 26432 | 35016 | Yes     |
|              |                            |                                | Wing   | 68 | 77 | 72.6 | 2.2  | 24461 | 35016 | Yes     |
|              |                            |                                | Head   | 25 | 42 | 27.7 | 3.5  | 3651  | 35016 | Unknown |
|              |                            |                                | Culmen | 10 | 15 | 12.2 | 1.2  | 4561  | 35016 | Unknown |
|              |                            |                                | Tarsus | 14 | 18 | 16.2 | 0.9  | 4228  | 35016 | Unknown |
|              |                            |                                | Tail   | 45 | 54 | 49.4 | 2.5  | 9840  | 35016 | Yes     |
|              |                            |                                | Head   | 27 | 28 | 27.2 | 0.3  | 6     | 740   | Unknown |
|              | 832 Red-throated Twinspot  | <i>Hypargos niveoguttatus</i>  | Culmen | 12 | 13 | 12.6 | 0.5  | 9     | 740   | Unknown |
|              |                            |                                | Tarsus | 17 | 18 | 17.4 | 0.4  | 6     | 740   | Unknown |
|              |                            |                                | Tail   | 50 | 57 | 53.7 | 2    | 16    | 740   | Unknown |
|              |                            |                                | Mass   | 13 | 17 | 15.3 | 1.1  | 197   | 740   | No      |
|              |                            |                                | Wing   | 53 | 60 | 56   | 2    | 69    | 740   | No      |
|              |                            |                                | Mass   | 7  | 11 | 9.4  | 9    | 404   | 608   | No      |
|              |                            |                                | Wing   | 46 | 50 | 48   | 1.2  | 300   | 608   | No      |
|              | 825 Sweet Waxbill          | <i>Coccopygia melanotis</i>    | Head   | 20 | 22 | 21   | 0.4  | 114   | 608   | Unknown |
|              |                            |                                | Culmen | 8  | 12 | 8.7  | 1    | 129   | 608   | Unknown |
|              |                            |                                | Tarsus | 13 | 16 | 14.2 | 0.7  | 108   | 608   | Unknown |
|              |                            |                                | Tail   | 35 | 40 | 37.3 | 1.4  | 146   | 608   | No      |
|              |                            |                                | Mass   | 9  | 14 | 11.3 | 3.5  | 5467  | 8066  | No      |
|              |                            |                                | Wing   | 53 | 60 | 56.8 | 3    | 3979  | 8066  | Yes     |
|              |                            |                                | Head   | 23 | 27 | 25   | 4.2  | 512   | 8066  | Unknown |
|              | 840 Violet-eared Waxbill   | <i>Uraeginthus granatinus</i>  | Culmen | 9  | 14 | 11.1 | 2.7  | 547   | 8066  | Unknown |
|              |                            |                                | Tarsus | 15 | 19 | 17.7 | 15.8 | 391   | 8066  | Unknown |
|              |                            |                                | Tail   | 48 | 80 | 69.7 | 8.8  | 999   | 8066  | Yes     |
|              |                            |                                | Mass   | 6  | 9  | 7.1  | 0.7  | 161   | 278   | No      |
|              |                            |                                | Wing   | 44 | 44 | 44.5 | 0    | 2     | 278   | Unknown |
|              |                            |                                | Mass   | 21 | 28 | 23.8 | 1.6  | 92    | 188   | No      |
|              |                            |                                | Wing   | 68 | 74 | 71.3 | 1.6  | 74    | 188   | No      |
|              | 826 Yellow-bellied Waxbill | <i>Coccopygia quartinia</i>    | Head   | 37 | 39 | 37.8 | 1    | 12    | 188   | Unknown |
|              |                            |                                | Culmen | 14 | 20 | 15.5 | 2    | 13    | 188   | Unknown |
|              |                            |                                | Tarsus | 17 | 17 | 17   | 0.5  | 3     | 188   | Unknown |
|              |                            |                                |        |    |    |      |      |       |       |         |
| Eurylaimidae | 454 African Broadbill      | <i>Smithornis capensis</i>     |        |    |    |      |      |       |       |         |
|              |                            |                                |        |    |    |      |      |       |       |         |
|              |                            |                                |        |    |    |      |      |       |       |         |
|              |                            |                                |        |    |    |      |      |       |       |         |

|              |                           |                              |        |    |    |      |     |       |       |         |
|--------------|---------------------------|------------------------------|--------|----|----|------|-----|-------|-------|---------|
| Fringillidae | 868 Black-eared Seedeater | <i>Crithagra mennelli</i>    | Tail   | 49 | 57 | 53.2 | 2.3 | 49    | 188   | Yes     |
|              |                           |                              | Mass   | 14 | 17 | 15.2 | 1.3 | 13    | 33    | Unknown |
|              | 861 Black-headed Canary   | <i>Serinus alario</i>        | Culmen | 8  | 9  | 8.1  | 0.4 | 16    | 175   | Unknown |
|              |                           |                              | Tail   | 43 | 49 | 45.9 | 1.6 | 27    | 175   | No      |
|              |                           |                              | Mass   | 10 | 17 | 12.3 | 1.8 | 124   | 175   | No      |
|              |                           |                              | Wing   | 61 | 72 | 66.3 | 2.9 | 103   | 175   | Yes     |
|              |                           |                              | Head   | 23 | 25 | 23.3 | 0.6 | 20    | 175   | Unknown |
|              |                           |                              | Tarsus | 14 | 16 | 15   | 0.5 | 11    | 175   | Unknown |
|              | 4102                      |                              | Mass   | 10 | 13 | 11.6 | 0.8 | 65    | 111   | Yes     |
|              |                           |                              | Wing   | 61 | 69 | 64.9 | 2.2 | 67    | 111   | Yes     |
|              |                           |                              | Head   | 23 | 25 | 23.9 | 0.5 | 14    | 111   | Unknown |
|              |                           |                              | Culmen | 8  | 10 | 8.9  | 0.7 | 61    | 111   | Unknown |
|              |                           |                              | Tarsus | 14 | 16 | 14.9 | 0.7 | 61    | 111   | Unknown |
|              |                           |                              | Tail   | 44 | 50 | 46.7 | 1.6 | 13    | 111   | Unknown |
|              | 860 Black-throated Canary | <i>Crithagra atrogularis</i> | Mass   | 10 | 14 | 11.7 | 1.7 | 11800 | 15266 | No      |
|              |                           |                              | Wing   | 64 | 71 | 67.6 | 2   | 9791  | 15266 | Yes     |
|              |                           |                              | Head   | 20 | 26 | 22.8 | 2.3 | 403   | 15266 | Unknown |
|              |                           |                              | Culmen | 8  | 21 | 11.1 | 5.8 | 405   | 15266 | Unknown |
|              |                           |                              | Tarsus | 12 | 17 | 14   | 2.2 | 329   | 15266 | Unknown |
|              |                           |                              | Tail   | 40 | 52 | 44.5 | 4.1 | 718   | 15266 | Yes     |
|              | 863 Brimstone Canary      | <i>Crithagra sulphurata</i>  | Mass   | 18 | 31 | 25   | 3.6 | 1898  | 3514  | No      |
|              |                           |                              | Wing   | 75 | 86 | 81.2 | 2.8 | 1249  | 3514  | No      |
|              |                           |                              | Head   | 29 | 33 | 31.7 | 1.1 | 272   | 3514  | Unknown |
|              |                           |                              | Culmen | 12 | 16 | 14.1 | 1   | 374   | 3514  | Unknown |
|              |                           |                              | Tarsus | 18 | 20 | 18.9 | 0.8 | 257   | 3514  | Unknown |
|              |                           |                              | Tail   | 57 | 68 | 62.4 | 2.9 | 411   | 3514  | No      |
|              | 875 Cabanis's Bunting     | <i>Emberiza cabanisi</i>     | Mass   | 19 | 27 | 24.4 | 2.5 | 10    | 30    | Unknown |
|              |                           |                              | Wing   | 81 | 84 | 82.5 | 2.1 | 2     | 30    | Unknown |
|              |                           |                              | Head   | 31 | 31 | 31.3 | NA  | 1     | 30    | Unknown |
|              |                           |                              | Culmen | 16 | 16 | 16   | NA  | 1     | 30    | Unknown |
|              |                           |                              | Tarsus | 20 | 20 | 19.9 | NA  | 1     | 30    | Unknown |
|              | 873 Cape Bunting          | <i>Emberiza capensis</i>     | Mass   | 17 | 25 | 20.6 | 2.4 | 2119  | 2959  | No      |
|              |                           |                              | Wing   | 69 | 86 | 76.6 | 4.7 | 1654  | 2959  | Yes     |
|              |                           |                              | Head   | 24 | 32 | 29.5 | 2.8 | 404   | 2959  | Unknown |
|              |                           |                              | Culmen | 9  | 17 | 11.7 | 1.9 | 349   | 2959  | Unknown |
|              |                           |                              | Tarsus | 18 | 23 | 20.5 | 1.5 | 369   | 2959  | Unknown |
|              |                           |                              | Tail   | 60 | 74 | 66.7 | 3.8 | 545   | 2959  | No      |
|              | 857 Cape Canary           | <i>Serinus canicollis</i>    | Mass   | 13 | 18 | 15.2 | 1.5 | 1824  | 3334  | No      |
|              |                           |                              | Wing   | 70 | 82 | 76.8 | 3.8 | 1158  | 3334  | Yes     |
|              |                           |                              | Head   | 24 | 27 | 25.8 | 4.7 | 270   | 3334  | Unknown |
|              |                           |                              | Culmen | 9  | 14 | 10.3 | 3.6 | 312   | 3334  | Unknown |
|              |                           |                              | Tarsus | 14 | 18 | 15.9 | 1.1 | 252   | 3334  | Unknown |
|              |                           |                              | Tail   | 48 | 59 | 53.9 | 3.3 | 465   | 3334  | Yes     |
|              | 855 Cape Siskin           | <i>Crithagra totta</i>       | Mass   | 12 | 16 | 13.2 | 1   | 458   | 558   | No      |
|              |                           |                              | Wing   | 66 | 73 | 69.8 | 2   | 424   | 558   | Yes     |

|                               |                                |        |    |    |      |     |      |       |         |
|-------------------------------|--------------------------------|--------|----|----|------|-----|------|-------|---------|
| 872 Cinnamon-breasted Bunting | <i>Emberiza tahapisi</i>       | Head   | 24 | 26 | 25.4 | 0.7 | 160  | 558   | Unknown |
|                               |                                | Culmen | 9  | 11 | 9.6  | 0.5 | 200  | 558   | Unknown |
|                               |                                | Tarsus | 14 | 17 | 15.6 | 0.7 | 156  | 558   | Unknown |
|                               |                                | Tail   | 48 | 55 | 51.4 | 1.9 | 212  | 558   | Yes     |
|                               |                                | Tail   | 54 | 75 | 61.5 | 7.2 | 394  | 2808  | Yes     |
|                               |                                | Mass   | 12 | 20 | 15.5 | 4.6 | 2073 | 2808  | No      |
|                               |                                | Wing   | 70 | 83 | 76   | 6.5 | 1691 | 2808  | Yes     |
|                               |                                | Head   | 22 | 32 | 26.5 | 5.3 | 286  | 2808  | Unknown |
|                               |                                | Culmen | 8  | 16 | 11.3 | 2.2 | 273  | 2808  | Unknown |
|                               |                                | Tarsus | 11 | 23 | 17.5 | 3.7 | 202  | 2808  | Unknown |
| 870 Common Chaffinch          | <i>Fringilla coelebs</i>       | Mass   | 17 | 21 | 19.3 | 1.4 | 17   | 20    | Unknown |
|                               |                                | Wing   | 76 | 83 | 79.2 | 2.2 | 11   | 20    | Unknown |
|                               |                                | Head   | 30 | 31 | 30.5 | 0.5 | 6    | 20    | Unknown |
|                               |                                | Culmen | 15 | 17 | 16.1 | 0.7 | 6    | 20    | Unknown |
|                               |                                | Tarsus | 17 | 18 | 17.7 | 0.5 | 4    | 20    | Unknown |
| 856 Drakensberg Siskin        | <i>Crithagra symonsi</i>       | Tail   | 59 | 64 | 61.2 | 2   | 8    | 20    | Unknown |
|                               |                                | Mass   | 15 | 19 | 16.8 | 1   | 146  | 176   | Yes     |
|                               |                                | Wing   | 74 | 79 | 76.4 | 1.5 | 145  | 176   | Yes     |
|                               |                                | Head   | 27 | 28 | 27.4 | 0.5 | 30   | 176   | Unknown |
|                               |                                | Culmen | 10 | 12 | 10.6 | 0.5 | 120  | 176   | Unknown |
| 858 Forest Canary             | <i>Crithagra scotops</i>       | Tarsus | 16 | 18 | 16.8 | 0.7 | 17   | 176   | Unknown |
|                               |                                | Tail   | 54 | 60 | 56.8 | 1.5 | 120  | 176   | Yes     |
|                               |                                | Head   | 25 | 28 | 26.6 | 0.9 | 221  | 1599  | Unknown |
|                               |                                | Tail   | 47 | 58 | 52.6 | 2.8 | 352  | 1599  | Unknown |
|                               |                                | Mass   | 13 | 18 | 15.3 | 1.3 | 1032 | 1599  | No      |
| 874 Golden-breasted Bunting   | <i>Emberiza flaviventris</i>   | Wing   | 62 | 72 | 67.1 | 2.6 | 896  | 1599  | Yes     |
|                               |                                | Culmen | 10 | 16 | 11.3 | 1.5 | 305  | 1599  | Unknown |
|                               |                                | Tarsus | 16 | 20 | 17.4 | 4.1 | 190  | 1599  | Unknown |
|                               |                                | Mass   | 15 | 23 | 19.2 | 5.6 | 2565 | 3618  | No      |
|                               |                                | Wing   | 75 | 89 | 81.7 | 4.9 | 1923 | 3618  | Yes     |
| 871 Lark-like Bunting         | <i>Emberiza impetuani</i>      | Head   | 21 | 31 | 29.3 | 4   | 394  | 3618  | Unknown |
|                               |                                | Culmen | 11 | 18 | 13.7 | 4.3 | 398  | 3618  | Unknown |
|                               |                                | Tarsus | 16 | 24 | 19   | 5.5 | 280  | 3618  | Unknown |
|                               |                                | Tail   | 60 | 78 | 70.1 | 7.5 | 564  | 3618  | Yes     |
|                               |                                | Head   | 25 | 28 | 26.6 | 0.7 | 295  | 19709 | Unknown |
| 921 Lemon-breasted Canary     | <i>Crithagra citrinipectus</i> | Culmen | 9  | 14 | 11.3 | 3.3 | 338  | 19709 | Unknown |
|                               |                                | Tarsus | 16 | 19 | 17.5 | 0.9 | 221  | 19709 | Unknown |
|                               |                                | Mass   | 12 | 70 | 16.5 | 9.6 | 5210 | 19709 | Yes     |
|                               |                                | Wing   | 69 | 80 | 74.2 | 3   | 3788 | 19709 | Yes     |
|                               |                                | Tail   | 53 | 65 | 58.9 | 3.1 | 758  | 19709 | Yes     |
| 869 Protea Canary             | <i>Crithagra leucoptera</i>    | Mass   | 10 | 12 | 11.3 | 0.6 | 19   | 39    | Unknown |
|                               |                                | Wing   | 65 | 66 | 65.5 | 0.6 | 4    | 39    | Unknown |
|                               |                                | Mass   | 18 | 23 | 21.1 | 1.4 | 159  | 189   | Unknown |
|                               |                                | Wing   | 68 | 74 | 70.4 | 1.8 | 149  | 189   | Unknown |
|                               |                                | Head   | 30 | 32 | 30.6 | 0.5 | 121  | 189   | Unknown |

|              |                              |                                  |        |     |     |       |      |       |        |         |
|--------------|------------------------------|----------------------------------|--------|-----|-----|-------|------|-------|--------|---------|
| Hirundinidae | 867 Streaky-headed Seedeater | <i>Crithagra gularis</i>         | Culmen | 12  | 14  | 12.8  | 0.8  | 137   | 189    | Unknown |
|              |                              |                                  | Tarsus | 17  | 19  | 18.5  | 0.5  | 131   | 189    | Unknown |
|              |                              |                                  | Tail   | 55  | 62  | 58.2  | 2.1  | 128   | 189    | Unknown |
|              |                              |                                  | Mass   | 16  | 24  | 20    | 2.1  | 2192  | 3761   | Yes     |
|              |                              |                                  | Wing   | 72  | 83  | 77.3  | 2.7  | 1508  | 3761   | Yes     |
|              |                              |                                  | Head   | 28  | 32  | 30.1  | 1    | 354   | 3761   | Unknown |
|              |                              |                                  | Culmen | 11  | 16  | 13.2  | 1.2  | 397   | 3761   | Unknown |
|              |                              |                                  | Tarsus | 16  | 20  | 17.5  | 1    | 315   | 3761   | Unknown |
|              | 865 White-throated Canary    | <i>Crithagra albogularis</i>     | Tail   | 56  | 67  | 61.9  | 3.7  | 499   | 3761   | Unknown |
|              |                              |                                  | Tarsus | 18  | 23  | 20    | 1.3  | 198   | 3121   | Unknown |
|              |                              |                                  | Mass   | 20  | 32  | 25.5  | 4.7  | 2062  | 3121   | No      |
|              |                              |                                  | Wing   | 73  | 87  | 80.4  | 4.3  | 1647  | 3121   | Yes     |
|              |                              |                                  | Head   | 30  | 34  | 32.1  | 1.2  | 243   | 3121   | Unknown |
|              | 859 Yellow-fronted Canary    | <i>Crithagra mozambica</i>       | Culmen | 12  | 20  | 16.2  | 2.4  | 267   | 3121   | Unknown |
|              |                              |                                  | Tail   | 51  | 62  | 56.1  | 3    | 663   | 3121   | Yes     |
|              |                              |                                  | Mass   | 11  | 16  | 12.9  | 1.9  | 5936  | 10481  | No      |
|              |                              |                                  | Wing   | 62  | 73  | 67.5  | 5.1  | 3171  | 10481  | No      |
|              |                              |                                  | Head   | 22  | 44  | 24.9  | 4.5  | 783   | 10481  | Unknown |
| Hirundinidae | 866 Yellow Canary            | <i>Crithagra flaviventris</i>    | Culmen | 8   | 15  | 9.9   | 3.1  | 910   | 10481  | Unknown |
|              |                              |                                  | Tarsus | 13  | 23  | 15.3  | 3.9  | 479   | 10481  | Unknown |
|              |                              |                                  | Tail   | 40  | 51  | 44.5  | 3.8  | 1228  | 10481  | No      |
|              |                              |                                  | Mass   | 14  | 23  | 17.9  | 7.3  | 4814  | 6695   | Yes     |
|              |                              |                                  | Wing   | 64  | 77  | 70.5  | 6.5  | 3564  | 6695   | Yes     |
|              | 494 Angolan Swallow          | <i>Hirundo angolensis</i>        | Head   | 24  | 52  | 27.5  | 6.1  | 408   | 6695   | Unknown |
|              |                              |                                  | Culmen | 9   | 17  | 11.9  | 3.8  | 421   | 6695   | Unknown |
|              |                              |                                  | Tarsus | 15  | 21  | 18    | 1.3  | 318   | 6695   | Unknown |
|              |                              |                                  | Tail   | 47  | 63  | 55.4  | 4.8  | 854   | 6695   | Yes     |
|              |                              |                                  | Mass   | 15  | 20  | 17.1  | 1.2  | 73    | 137    | Unknown |
|              | 510 Banded Martin            | <i>Riparia cincta</i>            | Wing   | 113 | 122 | 117.7 | 2.8  | 79    | 137    | Unknown |
|              |                              |                                  | Culmen | 6   | 6   | 6.1   | 0    | 2     | 137    | Unknown |
|              |                              |                                  | Tarsus | 12  | 12  | 12.3  | 0.2  | 3     | 137    | Unknown |
|              |                              |                                  | Tail   | 50  | 64  | 58.6  | 4.1  | 47    | 137    | Unknown |
|              |                              |                                  | Mass   | 18  | 28  | 23.6  | 2.4  | 256   | 1046   | Unknown |
| Hirundinidae | 493 Barn Swallow             | <i>Hirundo rustica</i>           | Wing   | 118 | 136 | 128.2 | 5.2  | 270   | 1046   | Unknown |
|              |                              |                                  | Head   | 24  | 60  | 34.7  | 9.5  | 78    | 1046   | Unknown |
|              |                              |                                  | Culmen | 9   | 52  | 13.5  | 9.5  | 70    | 1046   | Unknown |
|              |                              |                                  | Tarsus | 11  | 31  | 13.7  | 4.1  | 61    | 1046   | Unknown |
|              |                              |                                  | Tail   | 43  | 70  | 60.1  | 9.2  | 155   | 1046   | Unknown |
|              | 511 Black Saw-wing           | <i>Psalidoprocne pristoptera</i> | Mass   | 16  | 22  | 18.9  | 1.7  | 13832 | 185190 | Yes     |
|              |                              |                                  | Wing   | 113 | 128 | 121.4 | 3.8  | 7854  | 185190 | Yes     |
|              |                              |                                  | Head   | 27  | 87  | 36.8  | 16.9 | 731   | 185190 | Unknown |
|              |                              |                                  | Culmen | 7   | 64  | 13.1  | 11.9 | 608   | 185190 | Unknown |
|              |                              |                                  | Tarsus | 10  | 27  | 12.3  | 3.2  | 255   | 185190 | Unknown |
| Hirundinidae | 511 Black Saw-wing           | <i>Psalidoprocne pristoptera</i> | Tail   | 53  | 113 | 78.6  | 16.5 | 3235  | 185190 | Yes     |
|              |                              |                                  | Mass   | 10  | 13  | 11.4  | 0.8  | 635   | 892    | No      |

|                                |                                 |        |     |     |       |      |      |       |         |
|--------------------------------|---------------------------------|--------|-----|-----|-------|------|------|-------|---------|
| 497 Blue Swallow               | <i>Hirundo atrocaerulea</i>     | Wing   | 95  | 112 | 103.9 | 4.9  | 396  | 892   | Yes     |
|                                |                                 | Head   | 23  | 25  | 24.3  | 0.6  | 75   | 892   | Unknown |
|                                |                                 | Culmen | 5   | 11  | 6.8   | 1.8  | 78   | 892   | Unknown |
|                                |                                 | Tarsus | 9   | 12  | 10.2  | 0.9  | 50   | 892   | Unknown |
|                                |                                 | Tail   | 50  | 90  | 72.7  | 11.8 | 120  | 892   | Unknown |
| 509 Brown-throated Martin      | <i>Riparia paludicola</i>       | Mass   | 13  | 16  | 14    | 0.8  | 11   | 230   | Unknown |
|                                |                                 | Wing   | 110 | 116 | 113.2 | 2.5  | 4    | 230   | Unknown |
|                                |                                 | Tail   | 115 | 115 | 115   | NA   | 1    | 230   | Unknown |
|                                |                                 | Mass   | 11  | 15  | 12.7  | 1.1  | 4187 | 10335 | No      |
|                                |                                 | Wing   | 96  | 110 | 103.6 | 3.4  | 2669 | 10335 | Unknown |
| 507 Common House Martin        | <i>Delichon urbicum</i>         | Head   | 23  | 26  | 24.7  | 1.7  | 289  | 10335 | Unknown |
|                                |                                 | Culmen | 6   | 11  | 8.1   | 1.5  | 247  | 10335 | Unknown |
|                                |                                 | Tarsus | 10  | 23  | 12.2  | 3    | 104  | 10335 | Unknown |
|                                |                                 | Tail   | 48  | 59  | 53.5  | 3.1  | 644  | 10335 | Unknown |
|                                |                                 | Mass   | 12  | 21  | 16.2  | 2.3  | 60   | 270   | Unknown |
| 512 Eastern saw-winged swallow | <i>Psalidoprocne orientalis</i> | Wing   | 101 | 115 | 109.8 | 3.8  | 47   | 270   | Unknown |
|                                |                                 | Head   | 26  | 27  | 26.3  | 0.4  | 18   | 270   | Unknown |
|                                |                                 | Culmen | 8   | 10  | 9     | 0.8  | 16   | 270   | Unknown |
|                                |                                 | Tarsus | 10  | 12  | 11.6  | 0.7  | 13   | 270   | Unknown |
|                                |                                 | Tail   | 52  | 66  | 59    | 4.2  | 20   | 270   | Unknown |
| 502 Greater Striped Swallow    | <i>Cecropis cucullata</i>       | Mass   | 10  | 12  | 11    | 0.7  | 133  | 270   | No      |
|                                |                                 | Wing   | 97  | 97  | 97    | NA   | 1    | 270   | Unknown |
|                                |                                 | Head   | 23  | 23  | 23.1  | NA   | 1    | 270   | Unknown |
|                                |                                 | Culmen | 9   | 9   | 8.8   | NA   | 1    | 270   | Unknown |
|                                |                                 | Tarsus | 10  | 10  | 9.6   | NA   | 1    | 270   | Unknown |
| 499 Grey-rumped Swallow        | <i>Pseudhirundo griseopyga</i>  | Tail   | 68  | 68  | 68    | NA   | 1    | 270   | Unknown |
|                                |                                 | Mass   | 18  | 32  | 25.6  | 7.4  | 1402 | 3652  | No      |
|                                |                                 | Wing   | 98  | 132 | 122.5 | 10.9 | 950  | 3652  | Yes     |
|                                |                                 | Head   | 26  | 32  | 30.4  | 7.2  | 205  | 3652  | Unknown |
|                                |                                 | Culmen | 7   | 50  | 13.4  | 12.5 | 231  | 3652  | Unknown |
| 503 Lesser Striped Swallow     | <i>Cecropis abyssinica</i>      | Tarsus | 12  | 20  | 15.9  | 2.1  | 156  | 3652  | Unknown |
|                                |                                 | Tail   | 43  | 111 | 85.5  | 21.1 | 320  | 3652  | No      |
|                                |                                 | Mass   | 9   | 12  | 10.7  | 0.7  | 233  | 904   | Unknown |
|                                |                                 | Wing   | 96  | 97  | 96.5  | 0.7  | 2    | 904   | Unknown |
|                                |                                 | Mass   | 13  | 21  | 16.9  | 2.2  | 2363 | 4310  | Yes     |
| 498 Pearl-breasted Swallow     | <i>Hirundo dimidiata</i>        | Wing   | 96  | 118 | 107.7 | 9.9  | 1232 | 4310  | Yes     |
|                                |                                 | Head   | 25  | 51  | 29.3  | 18.6 | 235  | 4310  | Unknown |
|                                |                                 | Culmen | 6   | 17  | 9.1   | 4.3  | 277  | 4310  | Unknown |
|                                |                                 | Tarsus | 11  | 104 | 20.6  | 23.7 | 126  | 4310  | Unknown |
|                                |                                 | Tail   | 42  | 114 | 80.1  | 19.4 | 461  | 4310  | Yes     |
| 498 Pearl-breasted Swallow     | <i>Hirundo dimidiata</i>        | Mass   | 10  | 20  | 14.6  | 14.5 | 140  | 265   | Unknown |
|                                |                                 | Wing   | 100 | 110 | 104.8 | 2.9  | 107  | 265   | Unknown |
|                                |                                 | Head   | 25  | 29  | 26.7  | 1    | 30   | 265   | Unknown |
|                                |                                 | Culmen | 6   | 12  | 7.9   | 1.8  | 28   | 265   | Unknown |
|                                |                                 | Tarsus | 9   | 11  | 10.3  | 0.8  | 23   | 265   | Unknown |

|          |                                 |                                |        |     |     |       |      |      |       |         |
|----------|---------------------------------|--------------------------------|--------|-----|-----|-------|------|------|-------|---------|
| Laniidae | 501 Red-breasted Swallow        | <i>Cecropis semirufa</i>       | Tail   | 43  | 70  | 61    | 7.4  | 57   | 265   | Unknown |
|          |                                 |                                | Mass   | 24  | 38  | 29.1  | 3.6  | 64   | 672   | No      |
|          |                                 |                                | Wing   | 125 | 138 | 131.7 | 3.7  | 48   | 672   | Unknown |
|          |                                 |                                | Head   | 31  | 78  | 36.8  | 18.7 | 12   | 672   | Unknown |
|          |                                 |                                | Culmen | 9   | 15  | 12.2  | 2.1  | 14   | 672   | Unknown |
|          | 506 Rock Martin                 | <i>Ptyonoprogne fuligula</i>   | Tarsus | 15  | 17  | 15.8  | 0.6  | 10   | 672   | Unknown |
|          |                                 |                                | Tail   | 93  | 148 | 125.6 | 17.1 | 17   | 672   | Unknown |
|          |                                 |                                | Mass   | 18  | 26  | 22    | 2.2  | 504  | 1194  | Unknown |
|          |                                 |                                | Wing   | 121 | 137 | 129.5 | 4.1  | 378  | 1194  | Unknown |
|          |                                 |                                | Head   | 29  | 32  | 30.8  | 0.8  | 60   | 1194  | Unknown |
|          | 508 Sand Martin                 | <i>Riparia riparia</i>         | Culmen | 8   | 14  | 10.9  | 2.1  | 71   | 1194  | Unknown |
|          |                                 |                                | Tarsus | 10  | 13  | 11.6  | 0.8  | 54   | 1194  | Unknown |
|          |                                 |                                | Tail   | 51  | 60  | 55.9  | 2.4  | 137  | 1194  | Unknown |
|          |                                 |                                | Mass   | 11  | 15  | 13.1  | 1.1  | 307  | 1885  | Unknown |
|          |                                 |                                | Wing   | 98  | 111 | 105   | 4.8  | 99   | 1885  | Unknown |
|          | 504 South African Cliff Swallow | <i>Petrochelidon spilodera</i> | Head   | 24  | 37  | 26.5  | 4.8  | 22   | 1885  | Unknown |
|          |                                 |                                | Culmen | 6   | 10  | 8.3   | 1.2  | 20   | 1885  | Unknown |
|          |                                 |                                | Tarsus | 11  | 12  | 11.7  | 0.4  | 3    | 1885  | Unknown |
|          |                                 |                                | Tail   | 34  | 58  | 49.4  | 6.7  | 29   | 1885  | Unknown |
|          |                                 |                                | Mass   | 18  | 25  | 21.4  | 5.2  | 6426 | 29000 | No      |
|          | 495 White-throated Swallow      | <i>Hirundo albigularis</i>     | Wing   | 103 | 118 | 110.7 | 11.3 | 3650 | 29000 | No      |
|          |                                 |                                | Head   | 27  | 31  | 29.2  | 2.4  | 655  | 29000 | Unknown |
|          |                                 |                                | Culmen | 7   | 13  | 10.8  | 6.1  | 669  | 29000 | Unknown |
|          |                                 |                                | Tarsus | 12  | 15  | 13.4  | 1.1  | 250  | 29000 | Unknown |
|          |                                 |                                | Tail   | 49  | 62  | 55    | 4.5  | 1175 | 29000 | No      |
|          | 496 Wire-tailed Swallow         | <i>Hirundo smithii</i>         | Mass   | 17  | 27  | 22.4  | 13   | 1845 | 3688  | No      |
|          |                                 |                                | Wing   | 115 | 137 | 127.7 | 12.8 | 1408 | 3688  | Yes     |
|          |                                 |                                | Head   | 12  | 71  | 32.4  | 8.7  | 296  | 3688  | Unknown |
|          |                                 |                                | Culmen | 8   | 64  | 15.1  | 13.9 | 311  | 3688  | Unknown |
|          |                                 |                                | Tarsus | 10  | 33  | 14.6  | 10.5 | 161  | 3688  | Unknown |
| Laniidae | 707 Common Fiscal (pre-split)   | <i>Lanius collaris</i>         | Tail   | 12  | 83  | 64.4  | 16.3 | 481  | 3688  | No      |
|          |                                 |                                | Mass   | 12  | 17  | 13.3  | 1.5  | 87   | 307   | No      |
|          |                                 |                                | Wing   | 102 | 115 | 107.9 | 12.6 | 59   | 307   | No      |
|          |                                 |                                | Head   | 24  | 29  | 27.7  | 1.4  | 18   | 307   | Unknown |
|          |                                 |                                | Culmen | 6   | 12  | 7.9   | 1.7  | 19   | 307   | Unknown |
|          | 706 Lesser Grey Shrike          | <i>Lanius minor</i>            | Tarsus | 10  | 13  | 11    | 1    | 16   | 307   | Unknown |
|          |                                 |                                | Tail   | 50  | 72  | 58.4  | 8.5  | 7    | 307   | Unknown |
|          |                                 |                                | Mass   | 35  | 50  | 42.3  | 3.6  | 3987 | 7731  | Yes     |
|          |                                 |                                | Wing   | 93  | 104 | 98.7  | 3    | 3248 | 7731  | Yes     |
|          |                                 |                                | Head   | 41  | 47  | 43.8  | 1.5  | 1063 | 7731  | Unknown |
|          |                                 |                                | Culmen | 15  | 24  | 18.9  | 2.7  | 1141 | 7731  | Unknown |
|          |                                 |                                | Tarsus | 24  | 32  | 26.9  | 1.7  | 835  | 7731  | Unknown |
|          |                                 |                                | Tail   | 95  | 120 | 109.8 | 6.5  | 1583 | 7731  | Yes     |
|          |                                 |                                | Mass   | 39  | 61  | 46.3  | 5    | 198  | 297   | Unknown |
|          |                                 |                                | Wing   | 101 | 120 | 112.8 | 6.7  | 198  | 297   | Unknown |

|               |                                   |                                 |        |     |     |       |      |      |      |         |
|---------------|-----------------------------------|---------------------------------|--------|-----|-----|-------|------|------|------|---------|
| Malaconotidae | 724 Magpie Shrike                 | <i>Urolestes melanoleucus</i>   | Head   | 41  | 45  | 42.6  | 1.1  | 156  | 297  | Unknown |
|               |                                   |                                 | Culmen | 19  | 25  | 22.4  | 2.3  | 155  | 297  | Unknown |
|               |                                   |                                 | Tarsus | 23  | 27  | 25.1  | 0.9  | 150  | 297  | Unknown |
|               |                                   |                                 | Tail   | 83  | 100 | 90.2  | 5.3  | 149  | 297  | Unknown |
|               |                                   |                                 | Mass   | 71  | 99  | 84    | 7.1  | 380  | 969  | Yes     |
|               |                                   |                                 | Wing   | 128 | 142 | 135.7 | 4    | 350  | 969  | Yes     |
|               |                                   |                                 | Head   | 49  | 53  | 51.3  | 1.1  | 151  | 969  | Unknown |
|               |                                   |                                 | Culmen | 17  | 28  | 23.2  | 19.9 | 147  | 969  | Unknown |
|               |                                   |                                 | Tarsus | 33  | 40  | 35.4  | 1.8  | 110  | 969  | Unknown |
|               |                                   |                                 | Tail   | 134 | 330 | 269.6 | 52.8 | 163  | 969  | No      |
|               | 708 Red-backed Shrike             | <i>Lanius collurio</i>          | Mass   | 23  | 36  | 28.2  | 5.5  | 1240 | 2445 | No      |
|               |                                   |                                 | Wing   | 82  | 97  | 90.4  | 7.9  | 1028 | 2445 | No      |
|               |                                   |                                 | Head   | 36  | 48  | 39.3  | 6.7  | 498  | 2445 | Unknown |
|               |                                   |                                 | Culmen | 13  | 37  | 18.2  | 4.2  | 516  | 2445 | Unknown |
|               |                                   |                                 | Tarsus | 22  | 30  | 24.7  | 7.4  | 386  | 2445 | Unknown |
|               | 730 Southern White-crowned Shrike | <i>Eurocephalus anguitimens</i> | Tail   | 36  | 87  | 75.3  | 10   | 581  | 2445 | No      |
|               |                                   |                                 | Mass   | 55  | 80  | 67.9  | 8.3  | 371  | 443  | Unknown |
|               |                                   |                                 | Wing   | 125 | 143 | 134.8 | 7.4  | 318  | 443  | Unknown |
|               |                                   |                                 | Head   | 43  | 50  | 47.3  | 3.3  | 111  | 443  | Unknown |
|               |                                   |                                 | Culmen | 17  | 27  | 21.8  | 7.8  | 108  | 443  | Unknown |
|               | 712 Black-backed Puffback         | <i>Dryoscopus cubla</i>         | Tarsus | 24  | 29  | 26    | 3.5  | 83   | 443  | Unknown |
|               |                                   |                                 | Tail   | 42  | 111 | 101.1 | 14.4 | 137  | 443  | Unknown |
|               |                                   |                                 | Mass   | 22  | 34  | 27.5  | 6.1  | 1499 | 2386 | No      |
|               |                                   |                                 | Wing   | 74  | 87  | 80.6  | 4.9  | 1230 | 2386 | Yes     |
|               |                                   |                                 | Head   | 38  | 45  | 41.1  | 4.2  | 473  | 2386 | Unknown |
|               |                                   |                                 | Culmen | 16  | 26  | 20.5  | 6.1  | 507  | 2386 | Unknown |
|               |                                   |                                 | Tarsus | 21  | 33  | 24.4  | 6.2  | 356  | 2386 | Unknown |
|               |                                   |                                 | Tail   | 61  | 77  | 68.2  | 6.9  | 619  | 2386 | No      |
|               | 715 Black-crowned Tchagra         | <i>Tchagra senegalus</i>        | Mass   | 33  | 65  | 54.6  | 7.4  | 175  | 310  | Unknown |
|               |                                   |                                 | Wing   | 74  | 91  | 85.9  | 5.6  | 130  | 310  | Unknown |
|               |                                   |                                 | Head   | 43  | 50  | 47.6  | 5.8  | 52   | 310  | Unknown |
|               |                                   |                                 | Culmen | 19  | 27  | 22.8  | 2.3  | 53   | 310  | Unknown |
|               |                                   |                                 | Tarsus | 28  | 41  | 31.5  | 3.8  | 33   | 310  | Unknown |
|               | 677 Black-throated Wattle-eye     | <i>Platysteira peltata</i>      | Tail   | 90  | 111 | 100.1 | 5.6  | 54   | 310  | Unknown |
|               |                                   |                                 | Mass   | 12  | 16  | 13.6  | 1.3  | 121  | 347  | Yes     |
|               |                                   |                                 | Wing   | 61  | 69  | 64.9  | 2.1  | 107  | 347  | Yes     |
|               |                                   |                                 | Head   | 33  | 36  | 34.7  | 1    | 71   | 347  | Unknown |
|               |                                   |                                 | Culmen | 13  | 18  | 16.2  | 1.3  | 76   | 347  | Unknown |
|               | 722 Bokmakierie                   | <i>Telophorus zeylonus</i>      | Tarsus | 18  | 20  | 19.4  | 0.6  | 28   | 347  | Unknown |
|               |                                   |                                 | Tail   | 51  | 63  | 55.7  | 3.2  | 75   | 347  | Yes     |
|               |                                   |                                 | Mass   | 49  | 78  | 63.9  | 8    | 830  | 1413 | No      |
|               |                                   |                                 | Wing   | 88  | 106 | 97.4  | 5.9  | 650  | 1413 | Yes     |
|               |                                   |                                 | Head   | 47  | 56  | 51.8  | 5.6  | 184  | 1413 | Unknown |
|               |                                   |                                 | Culmen | 20  | 31  | 25.5  | 3.4  | 212  | 1413 | Unknown |
|               |                                   |                                 | Tarsus | 31  | 37  | 33.6  | 1.9  | 177  | 1413 | Unknown |

|                                   |                                |        |     |     |       |      |      |      |         |
|-----------------------------------|--------------------------------|--------|-----|-----|-------|------|------|------|---------|
| 714 Brown-crowned Tchagra         | <i>Tchagra australis</i>       | Tail   | 85  | 108 | 96    | 5.7  | 276  | 1413 | Unknown |
|                                   |                                | Mass   | 28  | 40  | 33.7  | 4.2  | 1486 | 2064 | No      |
|                                   |                                | Wing   | 70  | 82  | 76.2  | 4    | 1290 | 2064 | No      |
|                                   |                                | Head   | 38  | 89  | 42.6  | 9.8  | 574  | 2064 | Unknown |
|                                   |                                | Culmen | 16  | 27  | 20.9  | 11.2 | 610  | 2064 | Unknown |
|                                   |                                | Tarsus | 24  | 40  | 29.7  | 29.8 | 458  | 2064 | Unknown |
| 731 Brubru                        | <i>Nilaus afer</i>             | Tail   | 34  | 103 | 89.6  | 12.8 | 714  | 2064 | No      |
|                                   |                                | Mass   | 20  | 34  | 26.3  | 15.1 | 196  | 299  | No      |
|                                   |                                | Wing   | 78  | 91  | 84.3  | 6.7  | 162  | 299  | No      |
|                                   |                                | Head   | 36  | 40  | 38.2  | 1.1  | 51   | 299  | Unknown |
|                                   |                                | Culmen | 15  | 22  | 18.3  | 3.3  | 51   | 299  | Unknown |
|                                   |                                | Tarsus | 22  | 26  | 23.3  | 1.2  | 37   | 299  | Unknown |
| 672 Cape Batis                    | <i>Batis capensis</i>          | Tail   | 50  | 64  | 55.7  | 5.6  | 57   | 299  | Unknown |
|                                   |                                | Mass   | 10  | 14  | 11.9  | 1    | 1819 | 2461 | No      |
|                                   |                                | Wing   | 57  | 65  | 60.9  | 2    | 1572 | 2461 | Yes     |
|                                   |                                | Head   | 32  | 36  | 34    | 0.9  | 461  | 2461 | Unknown |
|                                   |                                | Culmen | 11  | 17  | 13.7  | 2    | 563  | 2461 | Unknown |
|                                   |                                | Tarsus | 20  | 23  | 21    | 0.9  | 405  | 2461 | Unknown |
| 729 Chestnut-fronted Helmetshrike | <i>Prionops scopifrons</i>     | Tail   | 42  | 50  | 46.2  | 2.1  | 722  | 2461 | No      |
|                                   |                                | Mass   | 24  | 30  | 26.8  | 1.7  | 16   | 28   | Unknown |
|                                   |                                | Wing   | 98  | 104 | 101.1 | 1.8  | 15   | 28   | Unknown |
| 673 Chinspot Batis                | <i>Batis molitor</i>           | Tail   | 75  | 81  | 78.2  | 1.9  | 14   | 28   | Unknown |
|                                   |                                | Mass   | 9   | 15  | 12    | 7.7  | 1534 | 2051 | No      |
|                                   |                                | Wing   | 56  | 65  | 60.6  | 3.2  | 1208 | 2051 | Yes     |
|                                   |                                | Head   | 29  | 35  | 32.4  | 2.6  | 437  | 2051 | Unknown |
|                                   |                                | Culmen | 10  | 19  | 14.5  | 3    | 473  | 2051 | Unknown |
|                                   |                                | Tarsus | 16  | 21  | 18.7  | 1.8  | 326  | 2051 | Unknown |
| 711 Crimson-breasted Shrike       | <i>Laniarius atrococcineus</i> | Tail   | 40  | 55  | 47.5  | 5    | 568  | 2051 | No      |
|                                   |                                | Mass   | 39  | 56  | 47.6  | 13   | 885  | 1277 | No      |
|                                   |                                | Wing   | 91  | 106 | 98.6  | 6.3  | 726  | 1277 | No      |
|                                   |                                | Head   | 42  | 87  | 47.2  | 9.3  | 251  | 1277 | Unknown |
|                                   |                                | Culmen | 18  | 32  | 23.4  | 3.2  | 274  | 1277 | Unknown |
|                                   |                                | Tarsus | 30  | 36  | 33.4  | 4.8  | 234  | 1277 | Unknown |
| 721 Gorgeous Bushshrike           | <i>Telophorus viridis</i>      | Tail   | 44  | 115 | 99.7  | 14.1 | 311  | 1277 | Yes     |
|                                   |                                | Mass   | 32  | 47  | 39.5  | 6.4  | 114  | 181  | No      |
|                                   |                                | Wing   | 54  | 85  | 79.4  | 7.3  | 102  | 181  | No      |
|                                   |                                | Head   | 40  | 46  | 42.9  | 1.5  | 40   | 181  | Unknown |
|                                   |                                | Culmen | 16  | 24  | 20    | 2.1  | 46   | 181  | Unknown |
|                                   |                                | Tarsus | 26  | 30  | 27.3  | 1.1  | 23   | 181  | Unknown |
| 723 Grey-headed Bushshrike        | <i>Malaconotus blanchoti</i>   | Tail   | 78  | 92  | 85.6  | 3.4  | 56   | 181  | Unknown |
|                                   |                                | Mass   | 68  | 93  | 81    | 6.1  | 236  | 316  | Unknown |
|                                   |                                | Wing   | 107 | 122 | 115.7 | 3.9  | 190  | 316  | Unknown |
|                                   |                                | Head   | 54  | 64  | 60.2  | 6.9  | 74   | 316  | Unknown |
|                                   |                                | Culmen | 25  | 36  | 31.2  | 2.8  | 79   | 316  | Unknown |
|                                   |                                | Tarsus | 32  | 43  | 36.5  | 6.8  | 57   | 316  | Unknown |



|                                |                                     |        |     |     |       |     |      |      |         |
|--------------------------------|-------------------------------------|--------|-----|-----|-------|-----|------|------|---------|
| 717 Olive Bushshrike           | <i>Chlorophoneus olivaceus</i>      | Tail   | 102 | 119 | 110.7 | 6.6 | 115  | 316  | Unknown |
|                                |                                     | Mass   | 26  | 37  | 30.7  | 4.8 | 339  | 601  | No      |
|                                |                                     | Wing   | 77  | 89  | 83    | 4.9 | 297  | 601  | No      |
|                                |                                     | Head   | 37  | 49  | 40.7  | 5   | 114  | 601  | Unknown |
|                                |                                     | Culmen | 14  | 23  | 19    | 6.7 | 118  | 601  | Unknown |
|                                |                                     | Tarsus | 24  | 28  | 25.5  | 1.1 | 85   | 601  | Unknown |
| 719 Orange-breasted Bushshrike | <i>Chlorophoneus sulfureopectus</i> | Tail   | 77  | 90  | 81.4  | 7.4 | 149  | 601  | No      |
|                                |                                     | Mass   | 23  | 35  | 28.1  | 4   | 362  | 656  | No      |
|                                |                                     | Wing   | 80  | 93  | 87.3  | 6.2 | 307  | 656  | Yes     |
|                                |                                     | Head   | 36  | 45  | 39.7  | 8.1 | 118  | 656  | Unknown |
|                                |                                     | Culmen | 13  | 25  | 17.3  | 6.6 | 130  | 656  | Unknown |
|                                |                                     | Tarsus | 23  | 37  | 26.5  | 7   | 88   | 656  | Unknown |
| 675 Pale Batis                 | <i>Batis soror</i>                  | Tail   | 80  | 96  | 87    | 9.7 | 154  | 656  | No      |
|                                |                                     | Mass   | 9   | 10  | 9.5   | 0.6 | 27   | 41   | Unknown |
|                                |                                     | Wing   | 54  | 55  | 54.5  | 0.5 | 6    | 41   | Unknown |
| 674 Pririt Batis               | <i>Batis pririt</i>                 | Tail   | 37  | 39  | 38    | 1   | 3    | 41   | Unknown |
|                                |                                     | Mass   | 7   | 11  | 8.9   | 1.4 | 372  | 468  | No      |
|                                |                                     | Wing   | 53  | 59  | 56.1  | 2.1 | 308  | 468  | Yes     |
|                                |                                     | Head   | 29  | 35  | 31    | 1.9 | 70   | 468  | Unknown |
|                                |                                     | Culmen | 9   | 19  | 13.8  | 4.5 | 100  | 468  | Unknown |
|                                |                                     | Tarsus | 16  | 21  | 18.1  | 1.5 | 76   | 468  | Unknown |
| 728 Retz's Helmetshrike        | <i>Prionops retzii</i>              | Tail   | 42  | 50  | 45.4  | 2.7 | 106  | 468  | No      |
|                                |                                     | Mass   | 42  | 55  | 47.4  | 3.6 | 43   | 108  | Unknown |
|                                |                                     | Wing   | 124 | 137 | 129.8 | 4   | 33   | 108  | Unknown |
|                                |                                     | Head   | 47  | 51  | 49.3  | 1.2 | 17   | 108  | Unknown |
|                                |                                     | Culmen | 18  | 25  | 21.2  | 2.3 | 17   | 108  | Unknown |
|                                |                                     | Tarsus | 23  | 24  | 23.4  | 0.5 | 7    | 108  | Unknown |
| 709 Southern Boubou            | <i>Laniarius ferrugineus</i>        | Tail   | 93  | 103 | 97.2  | 3   | 19   | 108  | Unknown |
|                                |                                     | Mass   | 46  | 68  | 56.4  | 5.9 | 1664 | 2661 | No      |
|                                |                                     | Wing   | 88  | 102 | 95.8  | 3.7 | 1437 | 2661 | Yes     |
|                                |                                     | Head   | 46  | 52  | 49.1  | 1.7 | 550  | 2661 | Unknown |
|                                |                                     | Culmen | 21  | 29  | 24.6  | 2.2 | 603  | 2661 | Unknown |
|                                |                                     | Tarsus | 31  | 40  | 34.6  | 2   | 426  | 2661 | Unknown |
| 713 Southern Tchagra           | <i>Tchagra tchagra</i>              | Tail   | 84  | 105 | 96.1  | 5.4 | 694  | 2661 | Yes     |
|                                |                                     | Mass   | 42  | 63  | 50.5  | 6.1 | 197  | 247  | Unknown |
|                                |                                     | Wing   | 75  | 86  | 81    | 3.8 | 159  | 247  | Unknown |
|                                |                                     | Head   | 45  | 53  | 49.6  | 2.4 | 31   | 247  | Unknown |
|                                |                                     | Culmen | 22  | 30  | 26    | 2   | 53   | 247  | Unknown |
|                                |                                     | Tarsus | 26  | 30  | 28.5  | 1.2 | 29   | 247  | Unknown |
| 710 Swamp Boubou               | <i>Laniarius bicolor</i>            | Tail   | 82  | 98  | 91.8  | 4.2 | 61   | 247  | Unknown |
|                                |                                     | Mass   | 44  | 65  | 53    | 5.7 | 75   | 112  | Unknown |
|                                |                                     | Wing   | 98  | 112 | 105.2 | 3.6 | 63   | 112  | Unknown |
|                                |                                     | Head   | 47  | 50  | 48.7  | 0.9 | 27   | 112  | Unknown |
|                                |                                     | Culmen | 22  | 28  | 26.2  | 2   | 35   | 112  | Unknown |
|                                |                                     | Tarsus | 32  | 37  | 34.7  | 1.4 | 24   | 112  | Unknown |

|              |                                     |                                        |        |     |     |       |      |      |      |         |
|--------------|-------------------------------------|----------------------------------------|--------|-----|-----|-------|------|------|------|---------|
| Monarchidae  | 977 Tropical Boubou                 | <i>Laniarius major</i>                 | Tail   | 101 | 110 | 105.9 | 2.9  | 34   | 112  | Unknown |
|              |                                     |                                        | Mass   | 40  | 58  | 49.1  | 5.2  | 194  | 322  | No      |
|              |                                     |                                        | Head   | 44  | 51  | 47.7  | 1.8  | 50   | 322  | Unknown |
|              |                                     |                                        | Culmen | 22  | 29  | 25.4  | 1.8  | 53   | 322  | Unknown |
|              |                                     |                                        | Tarsus | 31  | 38  | 34    | 1.8  | 40   | 322  | Unknown |
|              | 727 White-crested Helmetshrike      | <i>Prionops plumatus</i>               | Tail   | 93  | 110 | 102.2 | 4.3  | 73   | 322  | Unknown |
|              |                                     |                                        | Wing   | 87  | 103 | 94.9  | 5.7  | 138  | 322  | Yes     |
|              |                                     |                                        | Mass   | 28  | 41  | 34.1  | 4.4  | 702  | 1215 | No      |
|              |                                     |                                        | Wing   | 101 | 114 | 107.6 | 6.7  | 553  | 1215 | Yes     |
|              |                                     |                                        | Head   | 41  | 45  | 43.5  | 4.2  | 193  | 1215 | Unknown |
|              | 726 White-tailed Shrike             | <i>Lanioturdus torquatus</i>           | Culmen | 16  | 23  | 20    | 2.1  | 210  | 1215 | Unknown |
|              |                                     |                                        | Tarsus | 21  | 27  | 23.4  | 1.5  | 165  | 1215 | Unknown |
|              |                                     |                                        | Tail   | 80  | 96  | 87.8  | 6    | 293  | 1215 | No      |
|              |                                     |                                        | Mass   | 23  | 31  | 27    | 2.1  | 131  | 167  | Unknown |
|              |                                     |                                        | Wing   | 81  | 90  | 85.8  | 2.5  | 122  | 167  | Unknown |
|              | 676 Woodward's Batis                | <i>Batis fratrum</i>                   | Head   | 41  | 44  | 42.3  | 0.9  | 33   | 167  | Unknown |
|              |                                     |                                        | Culmen | 17  | 24  | 21.5  | 2.4  | 27   | 167  | Unknown |
|              |                                     |                                        | Tarsus | 29  | 32  | 30.4  | 0.7  | 24   | 167  | Unknown |
|              |                                     |                                        | Tail   | 41  | 49  | 45.6  | 2.8  | 27   | 167  | Unknown |
|              |                                     |                                        | Mass   | 10  | 15  | 12.9  | 6.3  | 61   | 76   | No      |
| Monarchidae  | 682 African Paradise Flycatcher     | <i>Terpsiphone viridis</i>             | Wing   | 55  | 64  | 60.1  | 2.4  | 58   | 76   | Yes     |
|              |                                     |                                        | Head   | 31  | 35  | 33.2  | 1.2  | 27   | 76   | Unknown |
|              |                                     |                                        | Culmen | 13  | 17  | 14.7  | 1.2  | 27   | 76   | Unknown |
|              |                                     |                                        | Tarsus | 18  | 22  | 19.6  | 1    | 22   | 76   | Unknown |
|              |                                     |                                        | Tail   | 32  | 39  | 35.5  | 1.8  | 34   | 76   | No      |
|              | 680 Blue-mantled Crested Flycatcher | <i>Blue-mantled Crested Flycatcher</i> | Mass   | 13  | 18  | 15.1  | 1.3  | 1884 | 3015 | No      |
|              |                                     |                                        | Wing   | 75  | 86  | 80.4  | 3    | 1570 | 3015 | Yes     |
|              |                                     |                                        | Head   | 34  | 39  | 36.7  | 1.4  | 510  | 3015 | Unknown |
|              |                                     |                                        | Culmen | 13  | 20  | 17.1  | 2.3  | 571  | 3015 | Unknown |
|              |                                     |                                        | Tarsus | 15  | 19  | 16.3  | 1.8  | 402  | 3015 | Unknown |
|              | 685 African Pied Wagtail            | <i>Motacilla aguimp</i>                | Tail   | 76  | 308 | 137.1 | 76.8 | 689  | 3015 | Yes     |
|              |                                     |                                        | Mass   | 9   | 13  | 10.6  | 1.6  | 308  | 460  | No      |
|              |                                     |                                        | Wing   | 62  | 70  | 66.1  | 2.3  | 274  | 460  | Yes     |
|              |                                     |                                        | Head   | 26  | 34  | 30.4  | 5.3  | 110  | 460  | Unknown |
|              |                                     |                                        | Culmen | 9   | 20  | 13.3  | 3.3  | 105  | 460  | Unknown |
| Motacillidae | 692 African Pipit                   | <i>Anthus cinnamomeus</i>              | Tarsus | 17  | 20  | 18    | 0.9  | 84   | 460  | Unknown |
|              |                                     |                                        | Tail   | 69  | 83  | 75.9  | 8.5  | 151  | 460  | No      |
|              |                                     |                                        | Mass   | 24  | 35  | 29.1  | 2.6  | 238  | 535  | No      |
|              |                                     |                                        | Wing   | 75  | 98  | 91.6  | 5.4  | 189  | 535  | Yes     |
|              |                                     |                                        | Head   | 36  | 41  | 38.5  | 6.5  | 71   | 535  | Unknown |
|              | 685 African Pied Wagtail            | <i>Motacilla aguimp</i>                | Culmen | 14  | 21  | 17.4  | 2.2  | 75   | 535  | Unknown |
|              |                                     |                                        | Tarsus | 23  | 29  | 25.7  | 1.7  | 53   | 535  | Unknown |
|              |                                     |                                        | Tail   | 69  | 104 | 93.9  | 10.6 | 76   | 535  | Unknown |
|              |                                     |                                        | Mass   | 21  | 28  | 24.5  | 1.8  | 754  | 1203 | Yes     |
|              |                                     |                                        | Wing   | 82  | 94  | 88.1  | 3.4  | 693  | 1203 | Yes     |

|                        |                           |        |    |     |       |      |      |      |         |
|------------------------|---------------------------|--------|----|-----|-------|------|------|------|---------|
| 695 Buffy Pipit        | <i>Anthus vaalensis</i>   | Head   | 34 | 39  | 36.5  | 2.5  | 467  | 1203 | Unknown |
|                        |                           | Culmen | 14 | 19  | 17.3  | 1.4  | 488  | 1203 | Unknown |
|                        |                           | Tarsus | 25 | 29  | 27.2  | 1.1  | 458  | 1203 | Unknown |
|                        |                           | Tail   | 59 | 70  | 65    | 3.4  | 526  | 1203 | Yes     |
|                        |                           | Mass   | 24 | 36  | 30.2  | 3.2  | 37   | 89   | Unknown |
|                        |                           | Wing   | 93 | 111 | 100.5 | 5.5  | 39   | 89   | Unknown |
|                        |                           | Head   | 36 | 41  | 38.8  | 1.4  | 20   | 89   | Unknown |
|                        |                           | Culmen | 15 | 21  | 18.4  | 1.7  | 20   | 89   | Unknown |
|                        |                           | Tarsus | 27 | 32  | 29.2  | 1.5  | 18   | 89   | Unknown |
|                        |                           | Tail   | 71 | 83  | 77.1  | 3.6  | 28   | 89   | Unknown |
| 699 Bushveld Pipit     | <i>Anthus caffer</i>      | Mass   | 15 | 17  | 16.5  | 0.8  | 10   | 22   | Unknown |
|                        |                           | Wing   | 70 | 79  | 73.9  | 3.1  | 7    | 22   | Unknown |
|                        |                           | Head   | 31 | 33  | 31.8  | 0.9  | 4    | 22   | Unknown |
|                        |                           | Culmen | 11 | 14  | 13.1  | 1.3  | 5    | 22   | Unknown |
|                        |                           | Tarsus | 18 | 19  | 18.7  | 0.5  | 5    | 22   | Unknown |
|                        |                           | Tail   | 50 | 55  | 52.5  | 2.1  | 4    | 22   | Unknown |
| 703 Cape Longclaw      | <i>Macronyx capensis</i>  | Mass   | 39 | 59  | 48.8  | 5.3  | 489  | 743  | Yes     |
|                        |                           | Wing   | 90 | 105 | 97.6  | 5.5  | 452  | 743  | Yes     |
|                        |                           | Head   | 41 | 56  | 44.3  | 4.4  | 187  | 743  | Unknown |
|                        |                           | Culmen | 16 | 35  | 20.9  | 3.8  | 196  | 743  | Unknown |
|                        |                           | Tarsus | 30 | 42  | 34.9  | 2.9  | 176  | 743  | Unknown |
|                        |                           | Tail   | 46 | 76  | 66.1  | 7.4  | 212  | 743  | No      |
| 686 Cape Wagtail       | <i>Motacilla capensis</i> | Mass   | 19 | 29  | 23.7  | 7.5  | 4293 | 8010 | No      |
|                        |                           | Wing   | 70 | 89  | 82.5  | 7.4  | 3133 | 8010 | Yes     |
|                        |                           | Head   | 26 | 75  | 36.7  | 8.9  | 730  | 8010 | Unknown |
|                        |                           | Culmen | 12 | 87  | 20.2  | 16.7 | 787  | 8010 | Unknown |
|                        |                           | Tarsus | 22 | 32  | 25.6  | 6.8  | 478  | 8010 | Unknown |
|                        |                           | Tail   | 68 | 96  | 86.1  | 9.7  | 1120 | 8010 | No      |
| 693 Long-billed Pipit  | <i>Anthus similis</i>     | Mass   | 13 | 35  | 28.5  | 5.2  | 96   | 162  | Unknown |
|                        |                           | Wing   | 59 | 119 | 96.7  | 10.8 | 87   | 162  | Unknown |
|                        |                           | Head   | 36 | 41  | 38.9  | 1.4  | 16   | 162  | Unknown |
|                        |                           | Culmen | 13 | 18  | 15.2  | 1.4  | 25   | 162  | Unknown |
|                        |                           | Tarsus | 25 | 29  | 26.9  | 1    | 18   | 162  | Unknown |
|                        |                           | Tail   | 71 | 81  | 75.6  | 3.3  | 29   | 162  | Unknown |
| 688 Mountain Wagtail   | <i>Motacilla clara</i>    | Mass   | 16 | 25  | 20.9  | 8.2  | 598  | 868  | No      |
|                        |                           | Wing   | 71 | 84  | 79.4  | 11.1 | 559  | 868  | Unknown |
|                        |                           | Head   | 33 | 38  | 35    | 1.4  | 48   | 868  | Unknown |
|                        |                           | Culmen | 13 | 19  | 16.6  | 1.8  | 43   | 868  | Unknown |
|                        |                           | Tarsus | 20 | 25  | 21.5  | 1.5  | 31   | 868  | Unknown |
|                        |                           | Tail   | 76 | 108 | 98.1  | 7.8  | 53   | 868  | Unknown |
| 694 Plain-backed Pipit | <i>Anthus leucophrys</i>  | Mass   | 26 | 61  | 32.7  | 14   | 24   | 79   | Unknown |
|                        |                           | Wing   | 89 | 100 | 96.1  | 3.3  | 22   | 79   | Unknown |
|                        |                           | Head   | 37 | 38  | 37.3  | 0.5  | 6    | 79   | Unknown |
|                        |                           | Culmen | 15 | 36  | 20    | 8.6  | 7    | 79   | Unknown |
|                        |                           | Tarsus | 27 | 30  | 28.8  | 1.2  | 5    | 79   | Unknown |

|              |                                |                                  |        |    |     |      |     |      |      |         |
|--------------|--------------------------------|----------------------------------|--------|----|-----|------|-----|------|------|---------|
| Muscicapidae | 1028 Red-throated Pipit        | <i>Anthus cervinus</i>           | Tail   | 68 | 78  | 73.5 | 3.7 | 8    | 79   | Unknown |
|              |                                |                                  | Mass   | 19 | 22  | 20.7 | 1.1 | 11   | 14   | Unknown |
|              |                                |                                  | Wing   | 83 | 89  | 86   | 1.9 | 10   | 14   | Unknown |
|              | 696 Striped Pipit              | <i>Anthus lineiventris</i>       | Mass   | 30 | 37  | 33.7 | 1.9 | 60   | 94   | Unknown |
|              |                                |                                  | Wing   | 79 | 91  | 86.3 | 3.3 | 58   | 94   | Unknown |
|              |                                |                                  | Head   | 39 | 42  | 40.6 | 0.9 | 24   | 94   | Unknown |
|              |                                |                                  | Culmen | 15 | 20  | 18.4 | 1.6 | 25   | 94   | Unknown |
|              |                                |                                  | Tarsus | 28 | 32  | 29.5 | 1.2 | 10   | 94   | Unknown |
|              |                                |                                  | Tail   | 67 | 80  | 71.4 | 3.7 | 26   | 94   | Unknown |
|              | 698 Tree Pipit                 | <i>Anthus trivialis</i>          | Mass   | 22 | 25  | 23.8 | 0.9 | 6    | 68   | Unknown |
|              | 701 Yellow-breasted Pipit      | <i>Anthus chloris</i>            | Mass   | 22 | 27  | 23.9 | 1.6 | 25   | 35   | Unknown |
|              |                                |                                  | Wing   | 82 | 90  | 84.5 | 2.9 | 23   | 35   | Unknown |
|              |                                |                                  | Head   | 36 | 37  | 36.3 | 0.4 | 14   | 35   | Unknown |
|              |                                |                                  | Culmen | 15 | 25  | 17.9 | 2.9 | 23   | 35   | Unknown |
|              |                                |                                  | Tarsus | 24 | 26  | 25.2 | 0.6 | 20   | 35   | Unknown |
|              |                                |                                  | Tail   | 64 | 75  | 68.3 | 3.4 | 21   | 35   | Unknown |
|              | 704 Yellow-throated Longclaw   | <i>Macronyx croceus</i>          | Mass   | 44 | 60  | 52.6 | 4.2 | 68   | 109  | Unknown |
|              |                                |                                  | Wing   | 93 | 104 | 98.5 | 3   | 60   | 109  | Unknown |
|              |                                |                                  | Head   | 43 | 46  | 44.5 | 0.8 | 20   | 109  | Unknown |
|              |                                |                                  | Culmen | 17 | 23  | 19.8 | 1.7 | 22   | 109  | Unknown |
|              |                                |                                  | Tarsus | 37 | 40  | 37.8 | 1.3 | 11   | 109  | Unknown |
|              |                                |                                  | Tail   | 73 | 87  | 80.2 | 3.9 | 25   | 109  | Unknown |
|              | 689 Yellow Wagtail (pre-split) | <i>Motacilla flava</i>           | Mass   | 15 | 21  | 17.1 | 1.4 | 1345 | 1984 | Yes     |
|              | 655 African Dusky Flycatcher   | <i>Muscicapa adusta</i>          | Wing   | 80 | 80  | 80   | NA  | 1    | 1984 | Unknown |
|              |                                |                                  | Mass   | 10 | 14  | 11.9 | 1   | 486  | 883  | No      |
|              |                                |                                  | Wing   | 64 | 70  | 66.9 | 1.7 | 406  | 883  | Unknown |
|              |                                |                                  | Head   | 29 | 31  | 30.1 | 0.8 | 151  | 883  | Unknown |
|              |                                |                                  | Culmen | 9  | 15  | 12.1 | 1.9 | 150  | 883  | Unknown |
|              |                                |                                  | Tarsus | 14 | 18  | 15.9 | 0.9 | 106  | 883  | Unknown |
|              | 576 African Stonechat          | <i>Saxicola torquatus</i>        | Tail   | 50 | 58  | 54   | 1.9 | 201  | 883  | Unknown |
|              |                                |                                  | Mass   | 13 | 19  | 15.8 | 1.9 | 1803 | 2764 | No      |
|              |                                |                                  | Wing   | 65 | 75  | 70.3 | 2.8 | 1510 | 2764 | Yes     |
|              |                                |                                  | Head   | 31 | 36  | 33.7 | 2.6 | 571  | 2764 | Unknown |
|              |                                |                                  | Culmen | 10 | 17  | 13.7 | 2.2 | 621  | 2764 | Unknown |
|              |                                |                                  | Tarsus | 21 | 26  | 23.3 | 1.7 | 489  | 2764 | Unknown |
|              | 575 Ant-eating Chat            | <i>Myrmecocichla formicivora</i> | Tail   | 46 | 58  | 51.9 | 4   | 728  | 2764 | Yes     |
|              |                                |                                  | Mass   | 36 | 57  | 45.4 | 4.9 | 1072 | 2107 | Yes     |
|              |                                |                                  | Wing   | 88 | 105 | 97.8 | 4.2 | 933  | 2107 | Yes     |
|              |                                |                                  | Head   | 42 | 48  | 45.4 | 1.6 | 322  | 2107 | Unknown |
|              |                                |                                  | Culmen | 16 | 24  | 20.8 | 2.3 | 76   | 2107 | Unknown |
|              |                                |                                  | Tarsus | 30 | 40  | 36.6 | 2.5 | 313  | 2107 | Unknown |
|              | 656 Ashy Flycatcher            | <i>Muscicapa caeruleascens</i>   | Tail   | 53 | 66  | 58.9 | 3.5 | 462  | 2107 | Yes     |
|              |                                |                                  | Mass   | 12 | 22  | 17.5 | 6.7 | 514  | 683  | No      |
|              |                                |                                  | Wing   | 63 | 83  | 75.6 | 7.4 | 485  | 683  | Yes     |
|              |                                |                                  | Head   | 32 | 36  | 33.7 | 1.3 | 226  | 683  | Unknown |

|                         |                                   |        |     |     |       |      |       |       |         |
|-------------------------|-----------------------------------|--------|-----|-----|-------|------|-------|-------|---------|
| 585 Bearded Scrub Robin | <i>Cercotrichas quadrivirgata</i> | Culmen | 10  | 17  | 13.9  | 1.9  | 246   | 683   | Unknown |
|                         |                                   | Tarsus | 16  | 20  | 17.7  | 1    | 140   | 683   | Unknown |
|                         |                                   | Tail   | 57  | 71  | 62.4  | 3.6  | 309   | 683   | Unknown |
|                         |                                   | Mass   | 21  | 32  | 26.9  | 14.5 | 326   | 520   | No      |
|                         |                                   | Wing   | 62  | 88  | 79.9  | 8.8  | 311   | 520   | Yes     |
|                         |                                   | Head   | 36  | 41  | 38.7  | 1.2  | 98    | 520   | Unknown |
|                         |                                   | Culmen | 14  | 20  | 17.2  | 1.6  | 103   | 520   | Unknown |
| 584 Brown Scrub Robin   | <i>Cercotrichas signata</i>       | Tarsus | 26  | 30  | 27.4  | 1.2  | 59    | 520   | Unknown |
|                         |                                   | Tail   | 68  | 88  | 76.2  | 5    | 152   | 520   | Unknown |
|                         |                                   | Head   | 19  | 49  | 43.7  | 7.7  | 185   | 535   | Unknown |
|                         |                                   | Culmen | 17  | 67  | 23.8  | 10.5 | 163   | 535   | Unknown |
|                         |                                   | Tarsus | 25  | 31  | 28.6  | 4.7  | 130   | 535   | Unknown |
|                         |                                   | Mass   | 26  | 79  | 35.3  | 20.2 | 431   | 535   | No      |
|                         |                                   | Wing   | 73  | 91  | 83.6  | 8.2  | 410   | 535   | Yes     |
| 569 Buff-streaked Chat  | <i>Campicoloides bifasciatus</i>  | Tail   | 45  | 86  | 76.4  | 9.6  | 261   | 535   | Unknown |
|                         |                                   | Mass   | 31  | 44  | 37.9  | 3.3  | 350   | 448   | Yes     |
|                         |                                   | Wing   | 85  | 101 | 92.8  | 3.8  | 345   | 448   | Yes     |
|                         |                                   | Head   | 39  | 44  | 41.9  | 1.4  | 35    | 448   | Unknown |
|                         |                                   | Tarsus | 29  | 34  | 31.2  | 1.3  | 38    | 448   | Unknown |
|                         |                                   | Culmen | 14  | 21  | 17.7  | 1.8  | 55    | 448   | Unknown |
|                         |                                   | Tail   | 54  | 66  | 60.5  | 3.5  | 56    | 448   | Yes     |
| 581 Cape Robin-Chat     | <i>Cossypha caffra</i>            | Mass   | 24  | 34  | 28.8  | 2.3  | 14148 | 23143 | Yes     |
|                         |                                   | Wing   | 79  | 96  | 87.6  | 4.6  | 12250 | 23143 | Yes     |
|                         |                                   | Head   | 37  | 42  | 39.8  | 1.3  | 3520  | 23143 | Unknown |
|                         |                                   | Culmen | 13  | 20  | 16.1  | 2.2  | 3792  | 23143 | Unknown |
|                         |                                   | Tarsus | 28  | 35  | 31.2  | 1.6  | 3064  | 23143 | Unknown |
|                         |                                   | Tail   | 72  | 94  | 82.9  | 5.7  | 5473  | 23143 | Yes     |
|                         |                                   | Mass   | 48  | 71  | 61.7  | 5.5  | 220   | 314   | Yes     |
| 559 Cape Rock Thrush    | <i>Monticola rupestris</i>        | Wing   | 103 | 118 | 111.6 | 4.2  | 198   | 314   | Yes     |
|                         |                                   | Head   | 52  | 59  | 55.2  | 1.7  | 72    | 314   | Unknown |
|                         |                                   | Culmen | 20  | 30  | 24.3  | 2.6  | 84    | 314   | Unknown |
|                         |                                   | Tarsus | 29  | 44  | 32.2  | 7.2  | 71    | 314   | Unknown |
|                         |                                   | Tail   | 71  | 84  | 77.6  | 6    | 99    | 314   | Yes     |
|                         |                                   | Wing   | 86  | 99  | 93    | 3.7  | 483   | 596   | Yes     |
|                         |                                   | Culmen | 16  | 22  | 19.5  | 2    | 232   | 596   | Unknown |
| 568 Capped Wheatear     | <i>Oenanthe pileata</i>           | Tail   | 53  | 68  | 60.2  | 5.1  | 403   | 596   | No      |
|                         |                                   | Mass   | 24  | 38  | 30    | 3.3  | 470   | 596   | Yes     |
|                         |                                   | Head   | 38  | 44  | 41.2  | 2.8  | 223   | 596   | Unknown |
|                         |                                   | Tarsus | 29  | 35  | 31.7  | 2    | 222   | 596   | Unknown |
|                         |                                   | Mass   | 29  | 42  | 34.9  | 3.3  | 154   | 231   | Yes     |
|                         |                                   | Wing   | 102 | 115 | 108.4 | 3.8  | 156   | 231   | Yes     |
|                         |                                   | Head   | 42  | 45  | 43.2  | 0.9  | 130   | 231   | Unknown |
| 663 Chat Flycatcher     | <i>Melaenornis infuscatus</i>     | Culmen | 20  | 24  | 22.2  | 1    | 127   | 231   | Unknown |
|                         |                                   | Tarsus | 25  | 28  | 26.8  | 0.8  | 115   | 231   | Unknown |
|                         |                                   | Tail   | 75  | 87  | 80.6  | 3.1  | 129   | 231   | Unknown |

|                               |                            |        |     |     |       |     |      |      |         |
|-------------------------------|----------------------------|--------|-----|-----|-------|-----|------|------|---------|
| 578 Chorister Robin-Chat      | <i>Cossypha dichroa</i>    | Tail   | 61  | 98  | 84.7  | 11  | 510  | 1581 | No      |
|                               |                            | Mass   | 32  | 49  | 40.6  | 4.2 | 1259 | 1581 | No      |
|                               |                            | Wing   | 90  | 108 | 99    | 6.6 | 1180 | 1581 | Yes     |
|                               |                            | Head   | 41  | 79  | 45.1  | 20  | 414  | 1581 | Unknown |
|                               |                            | Culmen | 14  | 30  | 19.2  | 3.8 | 373  | 1581 | Unknown |
|                               |                            | Tarsus | 28  | 36  | 31    | 2   | 320  | 1581 | Unknown |
| 593 Collared Palm Thrush      | <i>Cichladusa arquata</i>  | Mass   | 31  | 40  | 34.4  | 2.9 | 21   | 70   | Unknown |
|                               |                            | Wing   | 85  | 93  | 88.3  | 2.4 | 15   | 70   | Unknown |
|                               |                            | Head   | 40  | 41  | 40.6  | 0.6 | 4    | 70   | Unknown |
|                               |                            | Culmen | 21  | 21  | 21.1  | 0.1 | 2    | 70   | Unknown |
|                               |                            | Tarsus | 27  | 27  | 27.1  | 0.3 | 2    | 70   | Unknown |
| 1022 European Pied Flycatcher | <i>Ficedula hypoleuca</i>  | Mass   | 10  | 14  | 11.6  | 1   | 18   | 48   | Unknown |
| 570 Familiar Chat             | <i>Oenanthe familiaris</i> | Wing   | 80  | 84  | 82    | 1.4 | 16   | 48   | Unknown |
|                               |                            | Mass   | 15  | 25  | 19.8  | 2.5 | 1294 | 1905 | No      |
|                               |                            | Wing   | 78  | 92  | 85.1  | 4.3 | 1194 | 1905 | Yes     |
|                               |                            | Head   | 35  | 40  | 37.5  | 2.7 | 367  | 1905 | Unknown |
|                               |                            | Culmen | 12  | 23  | 16.2  | 5   | 378  | 1905 | Unknown |
|                               |                            | Tarsus | 22  | 28  | 25    | 1.7 | 301  | 1905 | Unknown |
| 665 Fiscal Flycatcher         | <i>Melaenornis silens</i>  | Tail   | 54  | 69  | 61.6  | 4.9 | 474  | 1905 | Yes     |
|                               |                            | Mass   | 24  | 32  | 27.3  | 2   | 3086 | 5074 | No      |
|                               |                            | Wing   | 87  | 98  | 92.8  | 3.1 | 2596 | 5074 | Yes     |
|                               |                            | Head   | 37  | 41  | 39    | 1.1 | 701  | 5074 | Unknown |
|                               |                            | Culmen | 13  | 20  | 15.7  | 2   | 745  | 5074 | Unknown |
|                               |                            | Tarsus | 22  | 28  | 24.2  | 1.5 | 619  | 5074 | Unknown |
| 657 Grey Tit-Flycatcher       | <i>Myioparus plumbeus</i>  | Tail   | 73  | 87  | 79.6  | 3.6 | 1053 | 5074 | Yes     |
|                               |                            | Mass   | 10  | 21  | 12.7  | 5   | 123  | 168  | Unknown |
|                               |                            | Wing   | 60  | 70  | 65.1  | 2.9 | 112  | 168  | Unknown |
|                               |                            | Head   | 30  | 32  | 31.4  | 0.7 | 46   | 168  | Unknown |
|                               |                            | Culmen | 11  | 16  | 13.1  | 1.6 | 49   | 168  | Unknown |
|                               |                            | Tarsus | 16  | 20  | 18.1  | 0.8 | 31   | 168  | Unknown |
| 557 Groundscraper Thrush      | <i>Turdus litsitsirupa</i> | Tail   | 57  | 69  | 62    | 3.3 | 56   | 168  | Unknown |
|                               |                            | Mass   | 63  | 91  | 76.5  | 7.9 | 515  | 682  | No      |
|                               |                            | Wing   | 116 | 136 | 127.1 | 8.8 | 454  | 682  | Yes     |
|                               |                            | Head   | 51  | 71  | 56.1  | 4.2 | 147  | 682  | Unknown |
|                               |                            | Culmen | 22  | 34  | 27.2  | 3   | 153  | 682  | Unknown |
|                               |                            | Tarsus | 33  | 55  | 37.3  | 5.3 | 108  | 682  | Unknown |
| 660 Herero Chat               | <i>Namibornis herero</i>   | Tail   | 56  | 80  | 69.9  | 9.6 | 193  | 682  | No      |
|                               |                            | Mass   | 23  | 32  | 27.3  | 2.8 | 21   | 42   | Unknown |
|                               |                            | Wing   | 89  | 97  | 91.8  | 2.4 | 21   | 42   | Unknown |
|                               |                            | Head   | 39  | 40  | 39.7  | 0.3 | 4    | 42   | Unknown |
|                               |                            | Culmen | 20  | 21  | 20.6  | 0.6 | 4    | 42   | Unknown |
|                               |                            | Tarsus | 23  | 23  | 23.1  | 0.2 | 2    | 42   | Unknown |
| 586 Kalahari Scrub Robin      | <i>Cercotrichas paena</i>  | Tail   | 65  | 67  | 66.3  | 1.2 | 3    | 42   | Unknown |
|                               |                            | Head   | 35  | 40  | 37.2  | 3.2 | 285  | 1763 | Unknown |
|                               |                            | Mass   | 16  | 25  | 20.2  | 2.7 | 1315 | 1763 | No      |

|                        |                                     |        |     |     |       |      |      |      |         |
|------------------------|-------------------------------------|--------|-----|-----|-------|------|------|------|---------|
| 566 Karoo Chat         | <i>Emarginata schlegelii</i>        | Wing   | 65  | 77  | 70.8  | 4.1  | 1057 | 1763 | Yes     |
|                        |                                     | Culmen | 13  | 21  | 17.9  | 4.4  | 365  | 1763 | Unknown |
|                        |                                     | Tarsus | 23  | 29  | 26.4  | 1.4  | 289  | 1763 | Unknown |
|                        |                                     | Tail   | 60  | 75  | 67.1  | 5.3  | 441  | 1763 | No      |
|                        |                                     | Mass   | 17  | 29  | 21    | 2.7  | 171  | 263  | No      |
|                        |                                     | Wing   | 85  | 101 | 92.5  | 4.2  | 173  | 263  | Yes     |
|                        |                                     | Head   | 36  | 40  | 37.7  | 1    | 137  | 263  | Unknown |
|                        |                                     | Culmen | 17  | 20  | 18.4  | 1    | 138  | 263  | Unknown |
|                        |                                     | Tarsus | 27  | 32  | 29.2  | 1.3  | 107  | 263  | Unknown |
|                        |                                     | Tail   | 59  | 72  | 64.8  | 3.3  | 138  | 263  | Yes     |
| 583 Karoo Scrub Robin  | <i>Cercotrichas coryphoeus</i>      | Mass   | 18  | 26  | 21.9  | 5.7  | 1101 | 2140 | Yes     |
|                        |                                     | Wing   | 30  | 79  | 71.6  | 8.9  | 827  | 2140 | No      |
|                        |                                     | Head   | 21  | 38  | 35.5  | 5.1  | 133  | 2140 | Unknown |
|                        |                                     | Culmen | 11  | 22  | 15.6  | 8.4  | 145  | 2140 | Unknown |
|                        |                                     | Tarsus | 26  | 31  | 28.1  | 1.4  | 113  | 2140 | Unknown |
|                        |                                     | Tail   | 63  | 80  | 72.3  | 6.1  | 364  | 2140 | Yes     |
| 1104 Karoo Thrush      | <i>Turdus smithi</i>                | Mass   | 64  | 88  | 76    | 7.8  | 5346 | 6708 | No      |
|                        |                                     | Wing   | 83  | 133 | 122.7 | 9.3  | 5504 | 6708 | Yes     |
|                        |                                     | Head   | 44  | 59  | 53.7  | 7.7  | 2884 | 6708 | Unknown |
|                        |                                     | Culmen | 21  | 33  | 25.9  | 5.8  | 2709 | 6708 | Unknown |
|                        |                                     | Tarsus | 29  | 39  | 33.9  | 8.7  | 2265 | 6708 | Unknown |
|                        |                                     | Tail   | 85  | 113 | 100.6 | 10   | 3916 | 6708 | Yes     |
| 552 Kurrichane Thrush  | <i>Turdus libonyana</i>             | Mass   | 54  | 80  | 65.1  | 7    | 3252 | 4457 | Yes     |
|                        |                                     | Wing   | 105 | 126 | 116.5 | 6.6  | 2625 | 4457 | Yes     |
|                        |                                     | Head   | 46  | 60  | 50.8  | 8    | 999  | 4457 | Unknown |
|                        |                                     | Culmen | 19  | 31  | 24.4  | 7.7  | 1058 | 4457 | Unknown |
|                        |                                     | Tarsus | 29  | 91  | 34.6  | 11.3 | 738  | 4457 | Unknown |
|                        |                                     | Tail   | 71  | 110 | 94.7  | 11   | 1408 | 4457 | Yes     |
| 661 Marico Flycatcher  | <i>Melaenornis mariquensis</i>      | Mass   | 19  | 28  | 22.8  | 3.6  | 1338 | 1831 | Yes     |
|                        |                                     | Wing   | 79  | 91  | 85.2  | 3.3  | 1115 | 1831 | No      |
|                        |                                     | Head   | 34  | 38  | 36.7  | 3.9  | 403  | 1831 | Unknown |
|                        |                                     | Culmen | 11  | 23  | 15.3  | 2.9  | 420  | 1831 | Unknown |
|                        |                                     | Tarsus | 20  | 27  | 22.8  | 1.7  | 291  | 1831 | Unknown |
|                        |                                     | Tail   | 59  | 85  | 75.5  | 7.7  | 492  | 1831 | No      |
| 573 Mocking Cliff Chat | <i>Thamnolaea cinnamomeiventris</i> | Mass   | 41  | 56  | 48.8  | 3.8  | 214  | 289  | No      |
|                        |                                     | Wing   | 102 | 120 | 111.6 | 7.2  | 195  | 289  | Yes     |
|                        |                                     | Head   | 41  | 49  | 46.4  | 2.9  | 70   | 289  | Unknown |
|                        |                                     | Culmen | 17  | 25  | 20.8  | 2.7  | 74   | 289  | Unknown |
|                        |                                     | Tarsus | 26  | 36  | 31    | 3.2  | 48   | 289  | Unknown |
|                        |                                     | Tail   | 62  | 106 | 92.2  | 11.1 | 86   | 289  | No      |
| 564 Mountain Wheatear  | <i>Myrmecocichla monticola</i>      | Head   | 41  | 47  | 43.8  | 1.8  | 228  | 882  | Unknown |
|                        |                                     | Culmen | 17  | 24  | 21.3  | 2.1  | 237  | 882  | Unknown |
|                        |                                     | Mass   | 26  | 45  | 33.6  | 5.6  | 581  | 882  | No      |
|                        |                                     | Wing   | 96  | 118 | 107.3 | 6    | 534  | 882  | Yes     |
|                        |                                     | Tarsus | 28  | 34  | 30.7  | 2    | 202  | 882  | Unknown |

|                               |                               |        |    |     |       |      |      |      |         |
|-------------------------------|-------------------------------|--------|----|-----|-------|------|------|------|---------|
| 556 Orange Ground Thrush      | <i>Geokichla gurneyi</i>      | Tail   | 63 | 79  | 71.3  | 4.6  | 273  | 882  | Yes     |
|                               |                               | Mass   | 50 | 75  | 60.8  | 6.8  | 223  | 364  | Unknown |
|                               |                               | Wing   | 97 | 119 | 110.3 | 7.6  | 143  | 364  | Unknown |
|                               |                               | Head   | 46 | 52  | 49.3  | 1.9  | 98   | 364  | Unknown |
|                               |                               | Culmen | 20 | 26  | 23.7  | 1.9  | 74   | 364  | Unknown |
|                               |                               | Tarsus | 32 | 36  | 33.8  | 1    | 83   | 364  | Unknown |
| 662 Pale Flycatcher           | <i>Melaenornis pallidus</i>   | Tail   | 75 | 94  | 85.9  | 5.1  | 97   | 364  | Unknown |
|                               |                               | Mass   | 16 | 26  | 21.4  | 2.7  | 118  | 247  | Unknown |
|                               |                               | Wing   | 71 | 93  | 83.8  | 6.4  | 73   | 247  | Unknown |
|                               |                               | Head   | 32 | 56  | 36.4  | 8.6  | 17   | 247  | Unknown |
|                               |                               | Culmen | 11 | 16  | 13.2  | 1.9  | 16   | 247  | Unknown |
|                               |                               | Tarsus | 20 | 22  | 20.6  | 0.8  | 10   | 247  | Unknown |
| 579 Red-capped Robin-Chat     | <i>Cossypha natalensis</i>    | Tail   | 54 | 78  | 64.1  | 8.8  | 21   | 247  | Unknown |
|                               |                               | Mass   | 26 | 39  | 32.7  | 16.2 | 2905 | 3989 | No      |
|                               |                               | Wing   | 80 | 96  | 88.1  | 8.4  | 2657 | 3989 | Yes     |
|                               |                               | Head   | 33 | 42  | 39.4  | 5.7  | 1199 | 3989 | Unknown |
|                               |                               | Culmen | 13 | 40  | 18.4  | 7.8  | 1295 | 3989 | Unknown |
|                               |                               | Tarsus | 25 | 31  | 27.8  | 4.2  | 704  | 3989 | Unknown |
| 910 Rufous-tailed Palm Thrush | <i>Cichladusa ruficauda</i>   | Tail   | 64 | 86  | 75.8  | 8.1  | 1601 | 3989 | Yes     |
|                               |                               | Mass   | 25 | 32  | 28.4  | 2.1  | 50   | 111  | Unknown |
|                               |                               | Wing   | 82 | 91  | 86.7  | 2.3  | 50   | 111  | Unknown |
|                               |                               | Head   | 40 | 43  | 41.2  | 1.3  | 23   | 111  | Unknown |
|                               |                               | Culmen | 16 | 23  | 19.4  | 2.2  | 20   | 111  | Unknown |
|                               |                               | Tarsus | 24 | 28  | 26.1  | 0.9  | 17   | 111  | Unknown |
| 560 Sentinel Rock Thrush      | <i>Monticola explorator</i>   | Tail   | 79 | 87  | 81.8  | 2.4  | 19   | 111  | Unknown |
|                               |                               | Mass   | 36 | 52  | 45    | 3.8  | 131  | 195  | Yes     |
|                               |                               | Wing   | 94 | 109 | 101.8 | 4    | 134  | 195  | Yes     |
|                               |                               | Head   | 46 | 51  | 48.6  | 1.7  | 34   | 195  | Unknown |
|                               |                               | Culmen | 18 | 24  | 20.8  | 2    | 36   | 195  | Unknown |
|                               |                               | Tarsus | 32 | 35  | 33.6  | 1    | 26   | 195  | Unknown |
| 561 Short-toed Rock Thrush    | <i>Monticola brevipes</i>     | Tail   | 56 | 65  | 60.6  | 2.6  | 38   | 195  | Yes     |
|                               |                               | Mass   | 29 | 46  | 36.5  | 8.4  | 273  | 357  | No      |
|                               |                               | Wing   | 93 | 109 | 100.5 | 5.2  | 265  | 357  | Yes     |
|                               |                               | Head   | 45 | 50  | 48    | 1.3  | 41   | 357  | Unknown |
|                               |                               | Culmen | 18 | 27  | 23.4  | 2.9  | 45   | 357  | Unknown |
|                               |                               | Tarsus | 25 | 28  | 26.3  | 0.8  | 33   | 357  | Unknown |
| 572 Sickle-winged Chat        | <i>Emarginata sinuata</i>     | Tail   | 58 | 70  | 64.1  | 3.5  | 65   | 357  | Yes     |
|                               |                               | Mass   | 18 | 22  | 20    | 1.2  | 28   | 36   | Unknown |
|                               |                               | Wing   | 77 | 82  | 79.9  | 1.7  | 25   | 36   | Unknown |
|                               |                               | Head   | 35 | 38  | 36.1  | 0.8  | 20   | 36   | Unknown |
|                               |                               | Culmen | 12 | 16  | 13.7  | 1.3  | 23   | 36   | Unknown |
|                               |                               | Tarsus | 29 | 31  | 30    | 0.7  | 12   | 36   | Unknown |
| 664 Southern Black Flycatcher | <i>Melaenornis pammelaina</i> | Tail   | 50 | 55  | 52.5  | 1.5  | 23   | 36   | Unknown |
|                               |                               | Mass   | 25 | 37  | 31.2  | 4.8  | 755  | 1021 | No      |
|                               |                               | Wing   | 91 | 116 | 105.5 | 12.2 | 709  | 1021 | Yes     |



|                              |                                 |        |     |     |       |     |     |      |         |
|------------------------------|---------------------------------|--------|-----|-----|-------|-----|-----|------|---------|
| 654 Spotted Flycatcher       | <i>Muscicapa striata</i>        | Head   | 37  | 41  | 39.2  | 3.1 | 303 | 1021 | Unknown |
|                              |                                 | Culmen | 12  | 20  | 15.8  | 2.2 | 316 | 1021 | Unknown |
|                              |                                 | Tarsus | 21  | 25  | 24.1  | 8.1 | 216 | 1021 | Unknown |
|                              |                                 | Tail   | 83  | 103 | 92.4  | 5   | 354 | 1021 | Unknown |
|                              |                                 | Mass   | 12  | 22  | 16.1  | 6.6 | 774 | 1205 | Unknown |
|                              |                                 | Wing   | 75  | 92  | 86.6  | 4.3 | 617 | 1205 | Unknown |
|                              |                                 | Head   | 31  | 38  | 33.9  | 3.1 | 261 | 1205 | Unknown |
|                              |                                 | Culmen | 11  | 19  | 15.3  | 2.7 | 270 | 1205 | Unknown |
| 558 Spotted Ground Thrush    | <i>Geokichla guttata</i>        | Tarsus | 14  | 22  | 16.5  | 7.7 | 205 | 1205 | Unknown |
|                              |                                 | Tail   | 52  | 68  | 60.3  | 6.3 | 310 | 1205 | Unknown |
|                              |                                 | Mass   | 62  | 78  | 69.7  | 4.1 | 61  | 138  | Unknown |
|                              |                                 | Wing   | 113 | 125 | 119.4 | 3.5 | 40  | 138  | Unknown |
|                              |                                 | Head   | 49  | 54  | 51.4  | 1.3 | 16  | 138  | Unknown |
|                              |                                 | Culmen | 22  | 27  | 24.2  | 1.7 | 13  | 138  | Unknown |
|                              |                                 | Tarsus | 31  | 33  | 32.2  | 1   | 8   | 138  | Unknown |
|                              |                                 | Tail   | 86  | 96  | 91.2  | 2.9 | 19  | 138  | Unknown |
| 590 Swynnerton's Robin       | <i>Swynnertonia swynnertoni</i> | Mass   | 14  | 18  | 16.5  | 1.2 | 21  | 92   | Unknown |
|                              |                                 | Wing   | 68  | 72  | 69.3  | 1.6 | 6   | 92   | Unknown |
|                              |                                 | Head   | 33  | 34  | 33.8  | 0.5 | 3   | 92   | Unknown |
|                              |                                 | Culmen | 15  | 15  | 14.9  | 0.3 | 3   | 92   | Unknown |
|                              |                                 | Tarsus | 24  | 27  | 25.7  | 1.3 | 3   | 92   | Unknown |
|                              |                                 | Tail   | 48  | 48  | 48    | 0   | 2   | 92   | Unknown |
|                              |                                 | Head   | 37  | 38  | 37.3  | 0.4 | 2   | 187  | Unknown |
|                              |                                 | Culmen | 18  | 18  | 18.2  | 0.1 | 2   | 187  | Unknown |
| 592 Thrush Nightingale       | <i>Luscinia luscinia</i>        | Tarsus | 27  | 27  | 26.8  | 0.2 | 2   | 187  | Unknown |
|                              |                                 | Tail   | 66  | 69  | 67.5  | 1.3 | 4   | 187  | Unknown |
|                              |                                 | Mass   | 14  | 28  | 22.5  | 4.3 | 19  | 187  | Unknown |
|                              |                                 | Wing   | 88  | 93  | 89.8  | 1.7 | 13  | 187  | Unknown |
|                              |                                 | Tarsus | 28  | 33  | 30.6  | 1.1 | 45  | 153  | Unknown |
|                              |                                 | Mass   | 22  | 32  | 26.1  | 2.7 | 127 | 153  | Unknown |
|                              |                                 | Wing   | 80  | 96  | 89.5  | 4.6 | 118 | 153  | Unknown |
|                              |                                 | Head   | 39  | 43  | 41.2  | 1.1 | 71  | 153  | Unknown |
| 571 Tractrac Chat            | <i>Emarginata tractrac</i>      | Culmen | 17  | 23  | 20.4  | 1.5 | 64  | 153  | Unknown |
|                              |                                 | Tail   | 50  | 58  | 53.1  | 2.5 | 65  | 153  | Unknown |
|                              |                                 | Mass   | 14  | 24  | 17    | 4   | 20  | 93   | Unknown |
|                              |                                 | Wing   | 76  | 81  | 77.7  | 1.6 | 19  | 93   | Unknown |
|                              |                                 | Mass   | 28  | 46  | 37    | 6.8 | 854 | 1495 | Yes     |
|                              |                                 | Wing   | 66  | 104 | 92.8  | 9.3 | 657 | 1495 | Yes     |
|                              |                                 | Head   | 38  | 45  | 41.8  | 4.6 | 248 | 1495 | Unknown |
|                              |                                 | Culmen | 14  | 23  | 18.8  | 2.3 | 269 | 1495 | Unknown |
| 577 Whinchat                 | <i>Saxicola rubetra</i>         | Tarsus | 28  | 35  | 31.2  | 1.8 | 196 | 1495 | Unknown |
|                              |                                 | Tail   | 73  | 98  | 87.7  | 7.1 | 304 | 1495 | Yes     |
|                              |                                 | Head   | 32  | 61  | 36.7  | 5.9 | 829 | 3267 | Unknown |
|                              |                                 | Culmen | 13  | 26  | 17.1  | 4.3 | 880 | 3267 | Unknown |
|                              |                                 | Tarsus | 23  | 36  | 26.5  | 6.4 | 543 | 3267 | Unknown |
|                              |                                 | Head   | 32  | 61  | 36.7  | 5.9 | 829 | 3267 | Unknown |
|                              |                                 | Culmen | 13  | 26  | 17.1  | 4.3 | 880 | 3267 | Unknown |
|                              |                                 | Tarsus | 23  | 36  | 26.5  | 6.4 | 543 | 3267 | Unknown |
| 580 White-browed Robin-Chat  | <i>Cossypha heuglini</i>        | Head   | 32  | 61  | 36.7  | 5.9 | 829 | 3267 | Unknown |
|                              |                                 | Culmen | 13  | 26  | 17.1  | 4.3 | 880 | 3267 | Unknown |
|                              |                                 | Tarsus | 23  | 36  | 26.5  | 6.4 | 543 | 3267 | Unknown |
|                              |                                 | Head   | 32  | 61  | 36.7  | 5.9 | 829 | 3267 | Unknown |
|                              |                                 | Culmen | 13  | 26  | 17.1  | 4.3 | 880 | 3267 | Unknown |
|                              |                                 | Tarsus | 23  | 36  | 26.5  | 6.4 | 543 | 3267 | Unknown |
|                              |                                 | Head   | 32  | 61  | 36.7  | 5.9 | 829 | 3267 | Unknown |
|                              |                                 | Culmen | 13  | 26  | 17.1  | 4.3 | 880 | 3267 | Unknown |
| 588 White-browed Scrub Robin | <i>Cercotrichas leucophrys</i>  | Tarsus | 23  | 36  | 26.5  | 6.4 | 543 | 3267 | Unknown |
|                              |                                 | Head   | 32  | 61  | 36.7  | 5.9 | 829 | 3267 | Unknown |
|                              |                                 | Culmen | 13  | 26  | 17.1  | 4.3 | 880 | 3267 | Unknown |
|                              |                                 | Tarsus | 23  | 36  | 26.5  | 6.4 | 543 | 3267 | Unknown |
|                              |                                 | Head   | 32  | 61  | 36.7  | 5.9 | 829 | 3267 | Unknown |
|                              |                                 | Culmen | 13  | 26  | 17.1  | 4.3 | 880 | 3267 | Unknown |
|                              |                                 | Tarsus | 23  | 36  | 26.5  | 6.4 | 543 | 3267 | Unknown |
|                              |                                 | Head   | 32  | 61  | 36.7  | 5.9 | 829 | 3267 | Unknown |

|               |                                     |                                |        |    |    |      |     |      |      |         |
|---------------|-------------------------------------|--------------------------------|--------|----|----|------|-----|------|------|---------|
| Nectariniidae | 589 White-starred Robin             | <i>Pogonocichla stellata</i>   | Tail   | 26 | 76 | 64.6 | 9.1 | 1064 | 3267 | No      |
|               |                                     |                                | Mass   | 16 | 26 | 19.8 | 8.1 | 2244 | 3267 | No      |
|               |                                     |                                | Wing   | 62 | 76 | 68.5 | 5.1 | 2012 | 3267 | Yes     |
|               |                                     |                                | Mass   | 17 | 26 | 21.2 | 2.2 | 1017 | 1768 | No      |
|               |                                     |                                | Wing   | 76 | 94 | 84.9 | 4.9 | 862  | 1768 | Yes     |
|               |                                     |                                | Head   | 35 | 38 | 36.7 | 2.9 | 374  | 1768 | Unknown |
|               |                                     |                                | Culmen | 11 | 20 | 15.9 | 2.5 | 217  | 1768 | Unknown |
|               |                                     |                                | Tarsus | 24 | 29 | 26.9 | 1.3 | 325  | 1768 | Unknown |
|               | 582 White-throated Robin-Chat       | <i>Cossypha humeralis</i>      | Tail   | 55 | 76 | 66.2 | 6.6 | 401  | 1768 | Yes     |
|               |                                     |                                | Mass   | 19 | 27 | 22.8 | 2.1 | 909  | 1337 | No      |
|               |                                     |                                | Wing   | 72 | 85 | 79.2 | 3.6 | 814  | 1337 | Yes     |
|               |                                     |                                | Head   | 37 | 47 | 39.5 | 5.1 | 311  | 1337 | Unknown |
|               |                                     |                                | Culmen | 14 | 21 | 17.5 | 2.5 | 318  | 1337 | Unknown |
|               | 772 Amethyst Sunbird                | <i>Chalcomitra amethystina</i> | Tarsus | 25 | 35 | 28.4 | 4.5 | 233  | 1337 | Unknown |
|               |                                     |                                | Tail   | 63 | 85 | 74.4 | 5.7 | 417  | 1337 | Yes     |
|               |                                     |                                | Mass   | 11 | 17 | 14   | 1.6 | 3695 | 8734 | No      |
|               |                                     |                                | Wing   | 64 | 75 | 69.9 | 3.3 | 2898 | 8734 | Yes     |
|               |                                     |                                | Head   | 40 | 48 | 44.6 | 1.9 | 911  | 8734 | Unknown |
|               |                                     |                                | Culmen | 25 | 33 | 29.2 | 2.2 | 1316 | 8734 | Unknown |
|               |                                     |                                | Tarsus | 16 | 20 | 17.6 | 3.5 | 654  | 8734 | Unknown |
|               |                                     |                                | Tail   | 41 | 53 | 47.3 | 3.3 | 1447 | 8734 | Yes     |
|               | 752 Bronzy Sunbird                  | <i>Nectarinia kilimensis</i>   | Mass   | 13 | 18 | 15.6 | 1.4 | 213  | 314  | Yes     |
|               |                                     |                                | Wing   | 62 | 73 | 68.4 | 3.8 | 12   | 314  | Unknown |
|               |                                     |                                | Head   | 43 | 43 | 43   | NA  | 1    | 314  | Unknown |
|               |                                     |                                | Culmen | 30 | 30 | 30   | NA  | 1    | 314  | Unknown |
|               |                                     |                                | Tail   | 64 | 64 | 64   | NA  | 1    | 314  | Unknown |
|               | 771 Collared Sunbird                | <i>Hedydipna collaris</i>      | Mass   | 6  | 9  | 7.4  | 0.6 | 208  | 313  | No      |
|               |                                     |                                | Wing   | 47 | 56 | 52.2 | 2.3 | 180  | 313  | Yes     |
|               |                                     |                                | Head   | 27 | 30 | 28.9 | 0.9 | 40   | 313  | Unknown |
|               |                                     |                                | Culmen | 13 | 17 | 15   | 1.4 | 46   | 313  | Unknown |
|               |                                     |                                | Tarsus | 15 | 33 | 17.7 | 7.5 | 23   | 313  | Unknown |
|               | 754 Copper Sunbird                  | <i>Cinnyris cupreus</i>        | Tail   | 35 | 41 | 38.1 | 1.9 | 49   | 313  | Yes     |
|               |                                     |                                | Mass   | 8  | 11 | 9.2  | 0.8 | 260  | 512  | Yes     |
|               |                                     |                                | Wing   | 56 | 66 | 60.3 | 2.7 | 186  | 512  | Yes     |
|               |                                     |                                | Head   | 33 | 36 | 34.8 | 1   | 17   | 512  | Unknown |
|               |                                     |                                | Culmen | 18 | 24 | 21.2 | 1.7 | 21   | 512  | Unknown |
|               | 764 Dusky Sunbird                   | <i>Cinnyris fuscus</i>         | Tarsus | 15 | 16 | 15.6 | 0.5 | 19   | 512  | Unknown |
|               |                                     |                                | Tail   | 40 | 51 | 47.2 | 3.3 | 20   | 512  | Unknown |
|               |                                     |                                | Mass   | 6  | 10 | 7.7  | 1.2 | 826  | 1077 | No      |
|               |                                     |                                | Wing   | 49 | 62 | 55.7 | 4.4 | 769  | 1077 | Yes     |
|               |                                     |                                | Head   | 32 | 38 | 35.2 | 1.6 | 352  | 1077 | Unknown |
|               | 758 Greater Double-collared Sunbird | <i>Cinnyris afer</i>           | Culmen | 20 | 27 | 23.9 | 1.9 | 365  | 1077 | Unknown |
|               |                                     |                                | Tarsus | 15 | 18 | 16.9 | 0.8 | 278  | 1077 | Unknown |
|               |                                     |                                | Tail   | 33 | 45 | 39   | 3.4 | 469  | 1077 | Yes     |
|               |                                     |                                | Mass   | 9  | 14 | 11.7 | 1.4 | 2194 | 3063 | No      |
|               |                                     |                                |        |    |    |      |     |      |      |         |

|                                                                               |                             |        |    |     |      |      |      |      |         |
|-------------------------------------------------------------------------------|-----------------------------|--------|----|-----|------|------|------|------|---------|
| 765 Grey Sunbird                                                              | <i>Cyanomitra veroxii</i>   | Wing   | 57 | 70  | 63.7 | 3.6  | 1866 | 3063 | Yes     |
|                                                                               |                             | Head   | 39 | 46  | 42.9 | 2    | 599  | 3063 | Unknown |
|                                                                               |                             | Culmen | 24 | 32  | 27.7 | 2.4  | 827  | 3063 | Unknown |
|                                                                               |                             | Tarsus | 16 | 20  | 18.2 | 1    | 438  | 3063 | Unknown |
|                                                                               |                             | Tail   | 42 | 58  | 50.3 | 4.3  | 910  | 3063 | Yes     |
|                                                                               |                             | Mass   | 10 | 14  | 11.6 | 1.3  | 882  | 1264 | Yes     |
|                                                                               |                             | Wing   | 56 | 67  | 61.9 | 3    | 807  | 1264 | Yes     |
|                                                                               |                             | Head   | 37 | 45  | 40.9 | 1.8  | 190  | 1264 | Unknown |
|                                                                               |                             | Culmen | 21 | 30  | 25.6 | 2.6  | 265  | 1264 | Unknown |
|                                                                               |                             | Tarsus | 15 | 20  | 17.1 | 1.5  | 109  | 1264 | Unknown |
| 751 Malachite Sunbird                                                         | <i>Nectarinia famosa</i>    | Tail   | 41 | 56  | 48.7 | 4.4  | 288  | 1264 | Yes     |
|                                                                               |                             | Mass   | 13 | 22  | 17.1 | 4    | 4244 | 6005 | Yes     |
|                                                                               |                             | Wing   | 65 | 84  | 74.9 | 5.8  | 3012 | 6005 | Yes     |
|                                                                               |                             | Head   | 45 | 55  | 50.7 | 2.6  | 594  | 6005 | Unknown |
|                                                                               |                             | Culmen | 28 | 38  | 32.6 | 2.6  | 1452 | 6005 | Unknown |
|                                                                               |                             | Tarsus | 15 | 19  | 16.6 | 1.1  | 682  | 6005 | Unknown |
|                                                                               |                             | Tail   | 45 | 143 | 67.7 | 30.1 | 1563 | 6005 | Yes     |
| 755 Marico Sunbird                                                            | <i>Cinnyris mariquensis</i> | Mass   | 8  | 15  | 11.6 | 3.7  | 977  | 1540 | Yes     |
|                                                                               |                             | Wing   | 55 | 70  | 65   | 4    | 819  | 1540 | Yes     |
|                                                                               |                             | Head   | 25 | 42  | 37.2 | 3.7  | 189  | 1540 | Unknown |
|                                                                               |                             | Culmen | 19 | 28  | 23.8 | 2.8  | 204  | 1540 | Unknown |
|                                                                               |                             | Tarsus | 16 | 38  | 19.9 | 20.2 | 194  | 1540 | Unknown |
|                                                                               |                             | Tail   | 36 | 53  | 45.9 | 4.5  | 349  | 1540 | Yes     |
|                                                                               |                             | Mass   | 8  | 11  | 9.4  | 0.9  | 717  | 1113 | Yes     |
| 759 Miombo Double-collared Sunbird (pre-spli <i>Cinnyris</i> <i>manoensis</i> |                             | Wing   | 55 | 65  | 60.6 | 2.9  | 93   | 1113 | Yes     |
|                                                                               |                             | Head   | 34 | 39  | 36.9 | 1.7  | 16   | 1113 | Unknown |
|                                                                               |                             | Culmen | 20 | 25  | 22.8 | 1.3  | 22   | 1113 | Unknown |
|                                                                               |                             | Tarsus | 16 | 19  | 17   | 1    | 22   | 1113 | Unknown |
|                                                                               |                             | Tail   | 36 | 47  | 41.8 | 3.1  | 25   | 1113 | Yes     |
|                                                                               |                             | Mass   | 6  | 7   | 6.7  | 0.4  | 5    | 17   | Unknown |
|                                                                               |                             | Wing   | 52 | 52  | 52   | 0    | 2    | 17   | Unknown |
| 761 Neergaard's Sunbird                                                       | <i>Cinnyris neergaardi</i>  | Tail   | 37 | 38  | 37.8 | 0.5  | 4    | 17   | Unknown |
|                                                                               |                             | Mass   | 9  | 14  | 12   | 4.3  | 4492 | 7521 | No      |
| 766 Olive Sunbird                                                             | <i>Cyanomitra olivacea</i>  | Wing   | 56 | 70  | 63.5 | 5.2  | 3284 | 7521 | Yes     |
|                                                                               |                             | Head   | 38 | 46  | 42.4 | 2.6  | 1225 | 7521 | Unknown |
|                                                                               |                             | Culmen | 23 | 33  | 27.7 | 3.2  | 1368 | 7521 | Unknown |
|                                                                               |                             | Tarsus | 15 | 20  | 17.2 | 1.8  | 753  | 7521 | Unknown |
|                                                                               |                             | Tail   | 45 | 66  | 55.9 | 6.2  | 1513 | 7521 | Yes     |
|                                                                               |                             | Mass   | 8  | 11  | 9.3  | 1    | 2706 | 4609 | Yes     |
|                                                                               |                             | Wing   | 48 | 58  | 53.4 | 2.8  | 2120 | 4609 | Yes     |
| 753 Orange-breasted Sunbird                                                   | <i>Anthobaphes violacea</i> | Head   | 34 | 40  | 37.6 | 1.6  | 738  | 4609 | Unknown |
|                                                                               |                             | Culmen | 19 | 25  | 21.6 | 1.4  | 964  | 4609 | Unknown |
|                                                                               |                             | Tarsus | 15 | 18  | 16.8 | 0.8  | 819  | 4609 | Unknown |
|                                                                               |                             | Tail   | 40 | 84  | 61.7 | 15.9 | 928  | 4609 | Yes     |
|                                                                               |                             | Mass   | 6  | 9   | 7.5  | 0.9  | 225  | 595  | Yes     |
|                                                                               |                             |        |    |     |      |      |      |      |         |
|                                                                               |                             |        |    |     |      |      |      |      |         |
| 756 Purple-banded Sunbird                                                     | <i>Cinnyris bifasciatus</i> |        |    |     |      |      |      |      |         |
|                                                                               |                             |        |    |     |      |      |      |      |         |

|           |                                      |                                 |        |     |     |       |      |      |       |         |
|-----------|--------------------------------------|---------------------------------|--------|-----|-----|-------|------|------|-------|---------|
| Oriolidae | 774 Scarlet-chested Sunbird          | <i>Chalcomitra senegalensis</i> | Wing   | 51  | 60  | 55.7  | 2.6  | 186  | 595   | Yes     |
|           |                                      |                                 | Head   | 29  | 35  | 31.1  | 1.8  | 33   | 595   | Unknown |
|           |                                      |                                 | Culmen | 15  | 23  | 18.1  | 2.6  | 36   | 595   | Unknown |
|           |                                      |                                 | Tarsus | 14  | 16  | 14.8  | 0.8  | 20   | 595   | Unknown |
|           |                                      |                                 | Tail   | 32  | 46  | 38.7  | 4.2  | 44   | 595   | Yes     |
|           |                                      |                                 | Mass   | 11  | 17  | 13.6  | 1.4  | 909  | 1586  | Yes     |
|           |                                      |                                 | Wing   | 64  | 77  | 70.4  | 3.7  | 816  | 1586  | Yes     |
|           |                                      |                                 | Head   | 41  | 46  | 43.6  | 1.6  | 39   | 1586  | Unknown |
|           |                                      |                                 | Culmen | 24  | 30  | 27.2  | 1.7  | 46   | 1586  | Unknown |
|           |                                      |                                 | Tarsus | 16  | 19  | 17.5  | 0.8  | 23   | 1586  | Unknown |
|           | 757 Shelley's Sunbird                | <i>Cinnyris shelleyi</i>        | Tail   | 43  | 57  | 49.2  | 4.2  | 69   | 1586  | Yes     |
|           |                                      |                                 | Mass   | 9   | 41  | 17.8  | 10.3 | 15   | 38    | Unknown |
|           | 760 Southern Double-collared Sunbird | <i>Cinnyris chalybeus</i>       | Wing   | 61  | 61  | 61    | NA   | 1    | 38    | Unknown |
|           |                                      |                                 | Mass   | 6   | 10  | 7.9   | 0.8  | 7608 | 11576 | No      |
|           |                                      |                                 | Wing   | 49  | 59  | 53.7  | 2.8  | 5387 | 11576 | Yes     |
|           |                                      |                                 | Head   | 32  | 40  | 35.3  | 2.1  | 1346 | 11576 | Unknown |
|           |                                      |                                 | Culmen | 17  | 26  | 20.5  | 2.4  | 1945 | 11576 | Unknown |
|           |                                      |                                 | Tarsus | 15  | 19  | 17    | 0.9  | 1202 | 11576 | Unknown |
|           | 762 Variable Sunbird                 | <i>Cinnyris venustus</i>        | Tail   | 36  | 49  | 42.5  | 3.8  | 2625 | 11576 | Yes     |
|           |                                      |                                 | Mass   | 6   | 9   | 7.3   | 0.7  | 1596 | 3024  | Yes     |
|           |                                      |                                 | Wing   | 47  | 55  | 51    | 3.9  | 183  | 3024  | Yes     |
|           |                                      |                                 | Head   | 29  | 35  | 32.1  | 1.5  | 82   | 3024  | Unknown |
|           |                                      |                                 | Culmen | 17  | 23  | 20.2  | 1.5  | 87   | 3024  | Unknown |
|           |                                      |                                 | Tarsus | 14  | 19  | 15.9  | 1    | 86   | 3024  | Unknown |
|           | 770 Western Violet-backed Sunbird    | <i>Anthreptes longuemarei</i>   | Tail   | 31  | 42  | 36.2  | 2.9  | 100  | 3024  | Yes     |
|           |                                      |                                 | Mass   | 12  | 13  | 12.6  | 0.5  | 10   | 20    | Unknown |
|           | 763 White-bellied Sunbird            | <i>Cinnyris talatala</i>        | Mass   | 6   | 11  | 8.3   | 4.6  | 3877 | 5743  | No      |
|           |                                      |                                 | Wing   | 50  | 61  | 54.9  | 3    | 3222 | 5743  | Yes     |
|           |                                      |                                 | Head   | 32  | 40  | 36.1  | 1.9  | 604  | 5743  | Unknown |
|           |                                      |                                 | Culmen | 18  | 26  | 22.6  | 5.9  | 700  | 5743  | Unknown |
|           |                                      |                                 | Tarsus | 15  | 40  | 18.6  | 10.3 | 555  | 5743  | Unknown |
|           |                                      |                                 | Tail   | 33  | 46  | 38.9  | 3.7  | 867  | 5743  | Yes     |
| Oriolidae | 520 African Golden Oriole            | <i>Oriolus auratus</i>          | Mass   | 63  | 74  | 67.6  | 4.2  | 7    | 52    | Unknown |
|           |                                      |                                 | Wing   | 140 | 140 | 140   | NA   | 1    | 52    | Unknown |
|           | 521 Black-headed Oriole              | <i>Oriolus larvatus</i>         | Mass   | 54  | 86  | 68.8  | 10.2 | 571  | 928   | No      |
|           |                                      |                                 | Wing   | 125 | 146 | 136.9 | 9.5  | 443  | 928   | Yes     |
|           |                                      |                                 | Head   | 29  | 90  | 54.4  | 11.3 | 142  | 928   | Unknown |
|           |                                      |                                 | Culmen | 23  | 38  | 28.2  | 6.4  | 151  | 928   | Unknown |
|           |                                      |                                 | Tarsus | 22  | 55  | 26.7  | 10.2 | 108  | 928   | Unknown |
|           |                                      |                                 | Tail   | 48  | 98  | 88.6  | 11.7 | 203  | 928   | Unknown |
|           | 519 Eurasian Golden Oriole           | <i>Oriolus oriolus</i>          | Mass   | 60  | 80  | 70.7  | 5.5  | 33   | 150   | Unknown |
|           |                                      |                                 | Wing   | 137 | 158 | 145.2 | 5.8  | 20   | 150   | Unknown |
|           |                                      |                                 | Head   | 53  | 55  | 53.7  | 0.8  | 4    | 150   | Unknown |
|           |                                      |                                 | Culmen | 30  | 30  | 29.9  | 0.5  | 3    | 150   | Unknown |
|           |                                      |                                 | Tarsus | 23  | 24  | 23.2  | 0.5  | 4    | 150   | Unknown |

|            |                        |                                |        |    |    |      |      |       |       |         |
|------------|------------------------|--------------------------------|--------|----|----|------|------|-------|-------|---------|
| Paridae    | 514 Ashy Tit           | <i>Melaniparus cinerascens</i> | Tail   | 81 | 85 | 83.8 | 1.6  | 5     | 150   | Unknown |
|            |                        |                                | Mass   | 16 | 25 | 20.3 | 2.8  | 498   | 661   | No      |
|            |                        |                                | Wing   | 70 | 85 | 77.6 | 6    | 412   | 661   | No      |
|            |                        |                                | Head   | 10 | 41 | 32.2 | 5.1  | 141   | 661   | Unknown |
|            |                        |                                | Culmen | 10 | 31 | 14.5 | 4.9  | 147   | 661   | Unknown |
|            | 531 Cape Penduline Tit | <i>Anthoscopus minutus</i>     | Tarsus | 18 | 27 | 20.4 | 2.3  | 108   | 661   | Unknown |
|            |                        |                                | Tail   | 53 | 69 | 59.6 | 6.4  | 159   | 661   | Unknown |
|            |                        |                                | Mass   | 6  | 9  | 7    | 2.9  | 158   | 515   | No      |
|            |                        |                                | Wing   | 45 | 57 | 49.6 | 3.2  | 63    | 515   | Unknown |
|            |                        |                                | Head   | 22 | 23 | 22.5 | 0.4  | 18    | 515   | Unknown |
|            | 528 Carp's Tit         | <i>Melaniparus carpi</i>       | Culmen | 8  | 12 | 10.1 | 1.2  | 18    | 515   | Unknown |
|            |                        |                                | Tarsus | 13 | 16 | 14.5 | 0.6  | 17    | 515   | Unknown |
|            |                        |                                | Tail   | 34 | 43 | 36.8 | 3.1  | 26    | 515   | Unknown |
|            |                        |                                | Mass   | 16 | 22 | 18.7 | 1.6  | 75    | 127   | Unknown |
|            |                        |                                | Wing   | 72 | 85 | 78.2 | 3.8  | 72    | 127   | Unknown |
|            | 530 Grey Penduline Tit | <i>Anthoscopus caroli</i>      | Head   | 30 | 31 | 30.4 | 0.3  | 7     | 127   | Unknown |
|            |                        |                                | Culmen | 11 | 14 | 13   | 1    | 7     | 127   | Unknown |
|            |                        |                                | Tarsus | 19 | 20 | 19.7 | 0.4  | 6     | 127   | Unknown |
|            |                        |                                | Tail   | 64 | 71 | 68.7 | 2.5  | 7     | 127   | Unknown |
|            |                        |                                | Mass   | 6  | 8  | 6.6  | 0.5  | 30    | 37    | Unknown |
|            | 525 Grey Tit           | <i>Melaniparus afer</i>        | Wing   | 50 | 54 | 52.6 | 1.4  | 11    | 37    | Unknown |
|            |                        |                                | Tail   | 32 | 32 | 32   | 0    | 2     | 37    | Unknown |
|            |                        |                                | Mass   | 18 | 24 | 20.3 | 1.7  | 60    | 163   | Unknown |
|            |                        |                                | Wing   | 67 | 81 | 73.6 | 8.5  | 51    | 163   | Unknown |
|            |                        |                                | Head   | 32 | 62 | 37.2 | 11.5 | 10    | 163   | Unknown |
|            | 527 Southern Black Tit | <i>Melaniparus niger</i>       | Culmen | 12 | 14 | 13   | 0.8  | 10    | 163   | Unknown |
|            |                        |                                | Tarsus | 20 | 22 | 20.9 | 0.7  | 7     | 163   | Unknown |
|            |                        |                                | Tail   | 55 | 65 | 59.5 | 3.6  | 13    | 163   | Unknown |
|            |                        |                                | Mass   | 18 | 27 | 22.6 | 5.2  | 893   | 1190  | No      |
|            |                        |                                | Wing   | 74 | 88 | 81.7 | 7.3  | 750   | 1190  | Yes     |
| Passeridae | 786 Cape Sparrow       | <i>Passer melanurus</i>        | Head   | 30 | 33 | 31.5 | 3.2  | 241   | 1190  | Unknown |
|            |                        |                                | Culmen | 10 | 20 | 13.4 | 7.9  | 259   | 1190  | Unknown |
|            |                        |                                | Tarsus | 18 | 26 | 20.9 | 5.6  | 172   | 1190  | Unknown |
|            |                        |                                | Tail   | 65 | 81 | 72.8 | 6.7  | 330   | 1190  | Yes     |
|            |                        |                                | Mass   | 22 | 31 | 26.3 | 2.4  | 24025 | 52811 | No      |
|            | 785 Great Sparrow      | <i>Passer motitensis</i>       | Wing   | 72 | 83 | 77.5 | 3    | 17323 | 52811 | Yes     |
|            |                        |                                | Head   | 29 | 35 | 31.8 | 3.5  | 3713  | 52811 | Unknown |
|            |                        |                                | Culmen | 11 | 16 | 13.1 | 1.3  | 3860  | 52811 | Unknown |
|            |                        |                                | Tarsus | 18 | 24 | 20.3 | 1.4  | 3114  | 52811 | Unknown |
|            |                        |                                | Tail   | 53 | 66 | 59.7 | 3.2  | 7126  | 52811 | Yes     |
|            |                        |                                | Mass   | 24 | 37 | 31   | 5.8  | 1385  | 2088  | No      |
|            |                        |                                | Wing   | 75 | 88 | 81.5 | 6    | 1238  | 2088  | Yes     |
|            |                        |                                | Head   | 31 | 44 | 33.7 | 2.6  | 191   | 2088  | Unknown |
|            |                        |                                | Culmen | 13 | 26 | 16.9 | 2.8  | 193   | 2088  | Unknown |
|            |                        |                                | Tarsus | 19 | 30 | 21.1 | 2.2  | 162   | 2088  | Unknown |

|           |                                   |                               |        |    |    |      |      |       |       |         |
|-----------|-----------------------------------|-------------------------------|--------|----|----|------|------|-------|-------|---------|
| Ploceidae | 784 House Sparrow                 | <i>Passer domesticus</i>      | Tail   | 53 | 83 | 59.8 | 7.6  | 246   | 2088  | No      |
|           |                                   |                               | Mass   | 21 | 29 | 24.6 | 2.1  | 8701  | 17127 | No      |
|           |                                   |                               | Wing   | 68 | 79 | 74.2 | 2.8  | 5993  | 17127 | Yes     |
|           |                                   |                               | Head   | 27 | 32 | 29.6 | 2.9  | 790   | 17127 | Unknown |
|           |                                   |                               | Culmen | 10 | 16 | 12.4 | 1.3  | 980   | 17127 | Unknown |
|           | 4142 Southern Grey-headed Sparrow | <i>Passer diffusus</i>        | Tarsus | 16 | 22 | 18.6 | 1.6  | 770   | 17127 | Unknown |
|           |                                   |                               | Tail   | 44 | 61 | 54   | 4.1  | 1666  | 17127 | Yes     |
|           |                                   |                               | Mass   | 22 | 28 | 24.5 | 1.6  | 3760  | 6184  | No      |
|           |                                   |                               | Wing   | 76 | 86 | 81.3 | 2.6  | 3577  | 6184  | Yes     |
|           |                                   |                               | Head   | 29 | 32 | 30.4 | 0.7  | 1151  | 6184  | Unknown |
|           | 788 Yellow-throated Petronia      | <i>Gymnoris supercilialis</i> | Culmen | 11 | 15 | 12.5 | 1.2  | 1221  | 6184  | Unknown |
|           |                                   |                               | Tarsus | 17 | 21 | 18.8 | 1.1  | 1008  | 6184  | Unknown |
|           |                                   |                               | Tail   | 56 | 68 | 62.6 | 2.8  | 1842  | 6184  | Yes     |
|           |                                   |                               | Mass   | 21 | 30 | 26   | 5.2  | 554   | 762   | No      |
|           |                                   |                               | Wing   | 80 | 97 | 89.2 | 5.9  | 383   | 762   | Yes     |
|           | 809 Black-winged Red Bishop       | <i>Euplectes hordeaceus</i>   | Head   | 30 | 35 | 32.9 | 2.2  | 107   | 762   | Unknown |
|           |                                   |                               | Culmen | 12 | 17 | 14.1 | 1.4  | 124   | 762   | Unknown |
|           |                                   |                               | Tarsus | 18 | 23 | 19.6 | 1.8  | 60    | 762   | Unknown |
|           |                                   |                               | Tail   | 53 | 67 | 58.6 | 5.3  | 206   | 762   | Unknown |
|           |                                   |                               | Mass   | 16 | 26 | 21.3 | 2.8  | 154   | 354   | Yes     |
|           | 799 Cape Weaver                   | <i>Ploceus capensis</i>       | Wing   | 61 | 81 | 72.4 | 5.7  | 120   | 354   | Yes     |
|           |                                   |                               | Head   | 26 | 33 | 29.9 | 1.8  | 16    | 354   | Unknown |
|           |                                   |                               | Culmen | 11 | 17 | 13.5 | 2    | 54    | 354   | Unknown |
|           |                                   |                               | Tarsus | 20 | 26 | 23.7 | 1.5  | 62    | 354   | Unknown |
|           |                                   |                               | Tail   | 34 | 54 | 44.3 | 5.2  | 65    | 354   | Yes     |
|           | 807 Cardinal Quelea               | <i>Quelea cardinalis</i>      | Mass   | 36 | 53 | 43.9 | 4.8  | 21698 | 48193 | Yes     |
|           |                                   |                               | Wing   | 81 | 94 | 87.8 | 3.6  | 17411 | 48193 | Yes     |
|           |                                   |                               | Head   | 40 | 46 | 43.2 | 3    | 3676  | 48193 | Unknown |
|           |                                   |                               | Culmen | 20 | 25 | 22.1 | 1.1  | 4264  | 48193 | Unknown |
|           |                                   |                               | Tarsus | 23 | 31 | 26.2 | 2    | 2677  | 48193 | Unknown |
|           | 796 Chestnut Weaver               | <i>Ploceus rubiginosus</i>    | Tail   | 52 | 62 | 56.7 | 3    | 7750  | 48193 | Yes     |
|           |                                   |                               | Mass   | 13 | 18 | 14.2 | 1.9  | 12    | 38    | Unknown |
|           |                                   |                               | Wing   | 58 | 60 | 59   | 1    | 3     | 38    | Unknown |
|           |                                   |                               | Mass   | 25 | 80 | 32.5 | 9.9  | 5133  | 7129  | Yes     |
|           |                                   |                               | Wing   | 35 | 85 | 77.3 | 8.7  | 5316  | 7129  | Yes     |
|           | 790 Dark-backed Weaver            | <i>Ploceus bicolor</i>        | Head   | 34 | 38 | 35.7 | 1.9  | 152   | 7129  | Unknown |
|           |                                   |                               | Culmen | 17 | 23 | 20.1 | 1.6  | 148   | 7129  | Unknown |
|           |                                   |                               | Tarsus | 20 | 24 | 21.4 | 1    | 96    | 7129  | Unknown |
|           |                                   |                               | Tail   | 47 | 58 | 52.2 | 3.2  | 794   | 7129  | Yes     |
|           |                                   |                               | Mass   | 30 | 56 | 38.2 | 18.2 | 284   | 445   | No      |
|           |                                   |                               | Wing   | 61 | 92 | 85.6 | 7.8  | 245   | 445   | No      |
|           |                                   |                               | Head   | 27 | 42 | 39.3 | 3.7  | 98    | 445   | Unknown |
|           |                                   |                               | Culmen | 18 | 59 | 22.1 | 8.5  | 88    | 445   | Unknown |
|           |                                   |                               | Tarsus | 22 | 27 | 23.9 | 1.4  | 71    | 445   | Unknown |
|           |                                   |                               | Tail   | 37 | 64 | 57.8 | 6    | 136   | 445   | No      |

|                               |                            |        |     |     |       |       |       |        |         |
|-------------------------------|----------------------------|--------|-----|-----|-------|-------|-------|--------|---------|
| 800 Eastern Golden Weaver     | <i>Ploceus subaureus</i>   | Mass   | 24  | 41  | 31.9  | 13.3  | 4231  | 6418   | No      |
|                               |                            | Wing   | 67  | 86  | 77.3  | 7.7   | 3553  | 6418   | Yes     |
|                               |                            | Head   | 34  | 50  | 37    | 4     | 1434  | 6418   | Unknown |
|                               |                            | Culmen | 16  | 23  | 18.6  | 2.8   | 1733  | 6418   | Unknown |
|                               |                            | Tarsus | 21  | 37  | 23.7  | 4.8   | 845   | 6418   | Unknown |
|                               |                            | Tail   | 47  | 61  | 53.8  | 4.7   | 2177  | 6418   | Yes     |
| 816 Fan-tailed Widowbird      | <i>Euplectes axillaris</i> | Mass   | 18  | 32  | 24.6  | 4     | 6611  | 8875   | Yes     |
|                               |                            | Wing   | 66  | 94  | 79.4  | 9.5   | 5600  | 8875   | Yes     |
|                               |                            | Head   | 30  | 44  | 32.9  | 4.3   | 1429  | 8875   | Unknown |
|                               |                            | Culmen | 14  | 20  | 16.3  | 1.5   | 2192  | 8875   | Unknown |
|                               |                            | Tarsus | 20  | 31  | 23.3  | 3     | 1082  | 8875   | Unknown |
|                               |                            | Tail   | 40  | 80  | 55.4  | 12.7  | 2813  | 8875   | Yes     |
| 801 Holub's Golden Weaver     | <i>Ploceus xanthops</i>    | Mass   | 32  | 49  | 40.7  | 5.6   | 584   | 1269   | Yes     |
|                               |                            | Wing   | 80  | 97  | 89.4  | 5.2   | 463   | 1269   | Yes     |
|                               |                            | Head   | 37  | 42  | 39.6  | 1.3   | 155   | 1269   | Unknown |
|                               |                            | Culmen | 19  | 24  | 21.5  | 1.6   | 166   | 1269   | Unknown |
|                               |                            | Tarsus | 23  | 28  | 25.9  | 1.4   | 147   | 1269   | Unknown |
|                               |                            | Tail   | 62  | 80  | 70.7  | 4.9   | 198   | 1269   | Yes     |
| 792 Lesser Masked Weaver      | <i>Ploceus intermedius</i> | Mass   | 17  | 26  | 21    | 4.8   | 3863  | 6656   | No      |
|                               |                            | Wing   | 66  | 76  | 70.8  | 3.9   | 3109  | 6656   | Yes     |
|                               |                            | Head   | 30  | 44  | 33.5  | 3.9   | 935   | 6656   | Unknown |
|                               |                            | Culmen | 13  | 22  | 16.4  | 8.8   | 990   | 6656   | Unknown |
|                               |                            | Tarsus | 19  | 46  | 24.8  | 30.3  | 706   | 6656   | Unknown |
|                               |                            | Tail   | 22  | 55  | 48    | 5.7   | 1452  | 6656   | Yes     |
| 818 Long-tailed Widowbird     | <i>Euplectes progne</i>    | Mass   | 24  | 45  | 33.9  | 6.2   | 986   | 1555   | Yes     |
|                               |                            | Wing   | 83  | 146 | 105.6 | 19.2  | 817   | 1555   | Yes     |
|                               |                            | Head   | 32  | 37  | 34.3  | 1.4   | 212   | 1555   | Unknown |
|                               |                            | Culmen | 15  | 20  | 17.7  | 1.2   | 225   | 1555   | Unknown |
|                               |                            | Tarsus | 23  | 30  | 25.9  | 2.3   | 181   | 1555   | Unknown |
|                               |                            | Tail   | 49  | 424 | 107.9 | 112.4 | 265   | 1555   | Yes     |
| 779 Red-billed Buffalo Weaver | <i>Bubalornis niger</i>    | Mass   | 61  | 95  | 78    | 12.7  | 638   | 854    | No      |
|                               |                            | Wing   | 106 | 127 | 117.4 | 8.8   | 538   | 854    | Yes     |
|                               |                            | Head   | 43  | 49  | 46.6  | 5.1   | 263   | 854    | Unknown |
|                               |                            | Culmen | 20  | 29  | 24.1  | 2.9   | 263   | 854    | Unknown |
|                               |                            | Tarsus | 27  | 36  | 30.5  | 2.2   | 161   | 854    | Unknown |
|                               |                            | Tail   | 87  | 115 | 100.8 | 9.5   | 325   | 854    | Yes     |
| 805 Red-billed Quelea         | <i>Quelea quelea</i>       | Mass   | 15  | 23  | 18.9  | 3.5   | 43587 | 151897 | No      |
|                               |                            | Wing   | 60  | 70  | 65.2  | 4.8   | 33348 | 151897 | Yes     |
|                               |                            | Head   | 26  | 38  | 28.2  | 2.8   | 3439  | 151897 | Unknown |
|                               |                            | Culmen | 12  | 18  | 14.2  | 1.8   | 4074  | 151897 | Unknown |
|                               |                            | Tarsus | 17  | 27  | 18.9  | 2.3   | 2977  | 151897 | Unknown |
|                               |                            | Tail   | 32  | 43  | 37.5  | 3.4   | 9093  | 151897 | Yes     |
| 813 Red-collared Widowbird    | <i>Euplectes ardens</i>    | Mass   | 15  | 26  | 19.9  | 2.8   | 5162  | 7337   | Yes     |
|                               |                            | Wing   | 61  | 80  | 70.3  | 5.4   | 3720  | 7337   | Yes     |
|                               |                            | Head   | 27  | 34  | 30.3  | 2.8   | 926   | 7337   | Unknown |

|                                    |                               |        |    |     |      |      |       |        |         |
|------------------------------------|-------------------------------|--------|----|-----|------|------|-------|--------|---------|
| 806 Red-headed Quelea              | <i>Quelea erythrops</i>       | Culmen | 12 | 18  | 14.7 | 1.4  | 1044  | 7337   | Unknown |
|                                    |                               | Tarsus | 18 | 25  | 20.9 | 1.8  | 728   | 7337   | Unknown |
|                                    |                               | Tail   | 33 | 241 | 77.8 | 64.1 | 1289  | 7337   | Yes     |
|                                    |                               | Mass   | 15 | 22  | 18.5 | 2    | 838   | 1392   | Yes     |
|                                    |                               | Wing   | 59 | 68  | 63.9 | 2.6  | 432   | 1392   | Yes     |
|                                    |                               | Head   | 28 | 30  | 28.9 | 0.8  | 58    | 1392   | Unknown |
|                                    |                               | Culmen | 12 | 15  | 13.8 | 0.7  | 93    | 1392   | Unknown |
|                                    |                               | Tarsus | 17 | 21  | 18.6 | 1.1  | 14    | 1392   | Unknown |
| 793 Red-headed Weaver              | <i>Anaplectes rubriceps</i>   | Tail   | 31 | 38  | 34.1 | 1.9  | 134   | 1392   | Yes     |
|                                    |                               | Mass   | 18 | 26  | 23.7 | 18.4 | 813   | 1023   | No      |
|                                    |                               | Wing   | 73 | 86  | 80   | 5    | 662   | 1023   | Yes     |
|                                    |                               | Head   | 32 | 50  | 35.2 | 4.6  | 457   | 1023   | Unknown |
|                                    |                               | Culmen | 14 | 20  | 17.3 | 2.1  | 460   | 1023   | Unknown |
|                                    |                               | Tarsus | 18 | 33  | 21   | 4.4  | 395   | 1023   | Unknown |
|                                    |                               | Tail   | 23 | 56  | 49.7 | 5.6  | 525   | 1023   | Yes     |
|                                    |                               | Mass   | 10 | 22  | 13.2 | 12.4 | 4119  | 7391   | No      |
| 789 Scaly-feathered Weaver         | <i>Sporopipes squamifrons</i> | Wing   | 52 | 60  | 56.4 | 2.1  | 2909  | 7391   | Yes     |
|                                    |                               | Head   | 22 | 40  | 23.8 | 3.4  | 419   | 7391   | Unknown |
|                                    |                               | Culmen | 9  | 19  | 11.1 | 6.9  | 472   | 7391   | Unknown |
|                                    |                               | Tarsus | 12 | 19  | 17.6 | 22.2 | 319   | 7391   | Unknown |
|                                    |                               | Tail   | 16 | 48  | 38.9 | 5    | 853   | 7391   | Yes     |
|                                    |                               | Mass   | 24 | 31  | 27.3 | 1.9  | 18672 | 29913  | Yes     |
|                                    |                               | Wing   | 70 | 79  | 74.7 | 2.6  | 15457 | 29913  | Yes     |
|                                    |                               | Head   | 32 | 45  | 35   | 3    | 729   | 29913  | Unknown |
| 783 Sociable Weaver                | <i>Philetairus socius</i>     | Culmen | 14 | 19  | 16.1 | 1    | 1136  | 29913  | Unknown |
|                                    |                               | Tarsus | 19 | 25  | 23   | 1.6  | 4549  | 29913  | Unknown |
|                                    |                               | Tail   | 34 | 49  | 44   | 4    | 1667  | 29913  | No      |
|                                    |                               | Mass   | 19 | 34  | 26.6 | 4.4  | 998   | 3217   | Yes     |
|                                    |                               | Wing   | 66 | 84  | 76.3 | 5    | 728   | 3217   | Yes     |
|                                    |                               | Head   | 34 | 38  | 36.2 | 1.4  | 85    | 3217   | Unknown |
|                                    |                               | Culmen | 16 | 22  | 18.5 | 1.4  | 102   | 3217   | Unknown |
|                                    |                               | Tarsus | 21 | 25  | 23.6 | 1.5  | 34    | 3217   | Unknown |
| 802 Southern Brown-throated Weaver | <i>Ploceus xanthopterus</i>   | Tail   | 47 | 62  | 53.9 | 4.1  | 169   | 3217   | Yes     |
|                                    |                               | Mass   | 20 | 35  | 27.5 | 3.9  | 91923 | 171502 | Yes     |
|                                    |                               | Wing   | 70 | 85  | 77.7 | 4.2  | 72597 | 171502 | Yes     |
|                                    |                               | Head   | 31 | 51  | 34.9 | 3.7  | 15423 | 171502 | Unknown |
|                                    |                               | Culmen | 14 | 21  | 17.1 | 1.7  | 17309 | 171502 | Unknown |
|                                    |                               | Tarsus | 19 | 27  | 22.4 | 2    | 13455 | 171502 | Unknown |
|                                    |                               | Tail   | 47 | 61  | 54.3 | 3.6  | 28527 | 171502 | Yes     |
|                                    |                               | Mass   | 18 | 32  | 23.9 | 4    | 80212 | 131664 | Yes     |
| 803 Southern Masked Weaver         | <i>Ploceus velatus</i>        | Wing   | 64 | 79  | 71.6 | 5    | 60600 | 131664 | Yes     |
|                                    |                               | Head   | 27 | 41  | 31   | 4.4  | 10965 | 131664 | Unknown |
|                                    |                               | Culmen | 13 | 21  | 15.6 | 3    | 13099 | 131664 | Unknown |
|                                    |                               | Tarsus | 18 | 28  | 21.5 | 4.8  | 9503  | 131664 | Unknown |
|                                    |                               | Tail   | 34 | 48  | 40.7 | 3.9  | 24642 | 131664 | Yes     |
|                                    |                               | Mass   | 18 | 32  | 23.9 | 4    | 80212 | 131664 | Yes     |
|                                    |                               | Wing   | 64 | 79  | 71.6 | 5    | 60600 | 131664 | Yes     |
|                                    |                               | Head   | 27 | 41  | 31   | 4.4  | 10965 | 131664 | Unknown |
| 808 Southern Red Bishop            | <i>Euplectes orix</i>         | Culmen | 13 | 21  | 15.6 | 3    | 13099 | 131664 | Unknown |
|                                    |                               | Tarsus | 18 | 28  | 21.5 | 4.8  | 9503  | 131664 | Unknown |
|                                    |                               | Tail   | 34 | 48  | 40.7 | 3.9  | 24642 | 131664 | Yes     |



|                                 |                              |        |    |     |       |      |       |       |         |
|---------------------------------|------------------------------|--------|----|-----|-------|------|-------|-------|---------|
| 791 Spectacled Weaver           | <i>Ploceus ocularis</i>      | Mass   | 22 | 36  | 28.4  | 5.5  | 3171  | 4925  | No      |
|                                 |                              | Wing   | 68 | 81  | 75    | 5.5  | 2646  | 4925  | Yes     |
|                                 |                              | Head   | 35 | 42  | 39    | 3.9  | 926   | 4925  | Unknown |
|                                 |                              | Culmen | 17 | 24  | 20.4  | 2.8  | 1097  | 4925  | Unknown |
|                                 |                              | Tarsus | 21 | 30  | 23.7  | 4    | 531   | 4925  | Unknown |
|                                 |                              | Tail   | 53 | 69  | 62.2  | 5.1  | 1277  | 4925  | Yes     |
| 804 Thick-billed Weaver         | <i>Amblyospiza albifrons</i> | Mass   | 33 | 56  | 43.1  | 6.7  | 3983  | 6632  | Yes     |
|                                 |                              | Wing   | 81 | 100 | 90.3  | 6.5  | 3436  | 6632  | Yes     |
|                                 |                              | Head   | 32 | 42  | 37.5  | 4.4  | 1612  | 6632  | Unknown |
|                                 |                              | Culmen | 17 | 27  | 21.7  | 2.5  | 1781  | 6632  | Unknown |
|                                 |                              | Tarsus | 20 | 28  | 23.1  | 2    | 1271  | 6632  | Unknown |
|                                 |                              | Tail   | 58 | 80  | 67.6  | 6.5  | 1997  | 6632  | Yes     |
| 797 Village Weaver              | <i>Ploceus cucullatus</i>    | Mass   | 27 | 46  | 37.4  | 5.3  | 13919 | 22558 | Yes     |
|                                 |                              | Wing   | 75 | 92  | 84.8  | 4.7  | 11364 | 22558 | Yes     |
|                                 |                              | Head   | 35 | 49  | 39.6  | 3.7  | 2735  | 22558 | Unknown |
|                                 |                              | Culmen | 17 | 24  | 20.4  | 2.2  | 4023  | 22558 | Unknown |
|                                 |                              | Tarsus | 20 | 39  | 24.2  | 4.9  | 1902  | 22558 | Unknown |
|                                 |                              | Tail   | 47 | 60  | 53.6  | 4.3  | 5285  | 22558 | Yes     |
| 780 White-browed Sparrow-Weaver | <i>Plocepasser mahali</i>    | Mass   | 37 | 51  | 43.7  | 3.7  | 11660 | 15710 | No      |
|                                 |                              | Wing   | 95 | 108 | 102.1 | 3.6  | 10140 | 15710 | Yes     |
|                                 |                              | Head   | 36 | 57  | 38.6  | 4.1  | 1204  | 15710 | Unknown |
|                                 |                              | Culmen | 16 | 23  | 18.8  | 2    | 1240  | 15710 | Unknown |
|                                 |                              | Tarsus | 23 | 26  | 24.7  | 0.8  | 5287  | 15710 | Unknown |
|                                 |                              | Tail   | 2  | 69  | 48.6  | 25.6 | 2200  | 15710 | Yes     |
| 814 White-winged Widowbird      | <i>Euplectes albonotatus</i> | Mass   | 16 | 26  | 20.2  | 2.7  | 6381  | 9695  | Yes     |
|                                 |                              | Wing   | 61 | 80  | 70.4  | 7.5  | 4374  | 9695  | Yes     |
|                                 |                              | Head   | 28 | 60  | 31.8  | 8.6  | 1142  | 9695  | Unknown |
|                                 |                              | Culmen | 13 | 20  | 15.1  | 1.8  | 1124  | 9695  | Unknown |
|                                 |                              | Tarsus | 18 | 30  | 20.9  | 2.9  | 875   | 9695  | Unknown |
|                                 |                              | Tail   | 26 | 93  | 54.6  | 17.9 | 1517  | 9695  | Yes     |
| 812 Yellow-crowned Bishop       | <i>Euplectes afer</i>        | Mass   | 13 | 23  | 16.5  | 8.3  | 3040  | 5010  | Yes     |
|                                 |                              | Wing   | 59 | 67  | 62.8  | 2.1  | 1949  | 5010  | Yes     |
|                                 |                              | Head   | 26 | 29  | 27.2  | 0.9  | 356   | 5010  | Unknown |
|                                 |                              | Culmen | 12 | 16  | 13.2  | 1.1  | 560   | 5010  | Unknown |
|                                 |                              | Tarsus | 16 | 20  | 17.1  | 0.9  | 405   | 5010  | Unknown |
|                                 |                              | Tail   | 32 | 40  | 35.8  | 2.4  | 758   | 5010  | Yes     |
| 815 Yellow-mantled Widowbird    | <i>Euplectes macroura</i>    | Mass   | 19 | 28  | 23.4  | 2.8  | 26    | 383   | Unknown |
|                                 |                              | Wing   | 67 | 81  | 74.6  | 5.1  | 25    | 383   | Unknown |
|                                 |                              | Head   | 30 | 34  | 31.3  | 1.3  | 23    | 383   | Unknown |
|                                 |                              | Culmen | 15 | 20  | 17    | 1.3  | 21    | 383   | Unknown |
|                                 |                              | Tarsus | 19 | 26  | 21.9  | 1.9  | 22    | 383   | Unknown |
|                                 |                              | Tail   | 48 | 106 | 75.3  | 25.3 | 20    | 383   | Unknown |
| 810 Yellow Bishop               | <i>Euplectes capensis</i>    | Mass   | 20 | 40  | 29.3  | 5.6  | 3890  | 7000  | Yes     |
|                                 |                              | Wing   | 66 | 88  | 76.8  | 5.9  | 2937  | 7000  | Yes     |
|                                 |                              | Head   | 30 | 37  | 33.7  | 2    | 1030  | 7000  | Unknown |

|              |                             |                               |        |    |     |       |      |       |       |         |
|--------------|-----------------------------|-------------------------------|--------|----|-----|-------|------|-------|-------|---------|
| Promeropidae | 749 Cape Sugarbird          | <i>Promerops cafer</i>        | Culmen | 13 | 19  | 16.4  | 1.5  | 1106  | 7000  | Unknown |
|              |                             |                               | Tarsus | 20 | 29  | 24    | 2.3  | 755   | 7000  | Unknown |
|              |                             |                               | Tail   | 43 | 62  | 52.1  | 5.3  | 1518  | 7000  | Yes     |
|              |                             |                               | Mass   | 27 | 42  | 34.3  | 4.1  | 8280  | 12328 | Yes     |
|              |                             |                               | Wing   | 77 | 99  | 87.7  | 6.2  | 5019  | 12328 | Yes     |
|              |                             |                               | Head   | 55 | 62  | 59    | 2.6  | 1555  | 12328 | Unknown |
|              |                             |                               | Culmen | 28 | 34  | 31.2  | 1.6  | 2342  | 12328 | Unknown |
|              |                             |                               | Tarsus | 21 | 25  | 22.9  | 1.1  | 1910  | 12328 | Unknown |
|              |                             |                               | Tail   | 84 | 340 | 185.1 | 86.8 | 2338  | 12328 | Yes     |
|              |                             |                               | Mass   | 27 | 44  | 34.9  | 5.1  | 1029  | 1506  | Yes     |
| Pycnonotidae | 750 Gurney's Sugarbird      | <i>Promerops gurneyi</i>      | Wing   | 81 | 99  | 90.1  | 5.8  | 895   | 1506  | Yes     |
|              |                             |                               | Head   | 28 | 56  | 51.4  | 6.9  | 478   | 1506  | Unknown |
|              |                             |                               | Culmen | 26 | 134 | 36.5  | 26.8 | 584   | 1506  | Unknown |
|              |                             |                               | Tarsus | 19 | 24  | 21.3  | 1.3  | 413   | 1506  | Unknown |
|              |                             |                               | Tail   | 53 | 173 | 121   | 29.9 | 526   | 1506  | Yes     |
|              | 544 African Red-eyed Bulbul | <i>Pycnonotus nigricans</i>   | Mass   | 25 | 41  | 32.8  | 11.4 | 13564 | 17353 | Yes     |
|              |                             |                               | Wing   | 84 | 103 | 93.6  | 7    | 10904 | 17353 | Yes     |
|              |                             |                               | Head   | 33 | 42  | 39    | 5.3  | 1077  | 17353 | Unknown |
|              |                             |                               | Culmen | 15 | 23  | 18.7  | 2.4  | 1125  | 17353 | Unknown |
|              |                             |                               | Tarsus | 19 | 27  | 22    | 2.5  | 869   | 17353 | Unknown |
|              |                             |                               | Tail   | 73 | 92  | 82.5  | 6.3  | 2573  | 17353 | No      |
|              | 543 Cape Bulbul             | <i>Pycnonotus capensis</i>    | Mass   | 32 | 42  | 37.1  | 2.7  | 7189  | 10878 | Yes     |
|              |                             |                               | Wing   | 86 | 98  | 91.9  | 3.1  | 4823  | 10878 | Yes     |
|              |                             |                               | Head   | 38 | 43  | 40.6  | 3.9  | 888   | 10878 | Unknown |
|              |                             |                               | Culmen | 15 | 22  | 17.7  | 1.6  | 949   | 10878 | Unknown |
|              |                             |                               | Tarsus | 21 | 28  | 24.1  | 1.8  | 802   | 10878 | Unknown |
|              |                             |                               | Tail   | 80 | 92  | 85.8  | 3.3  | 2105  | 10878 | Yes     |
|              | 545 Dark-capped Bulbul      | <i>Pycnonotus tricolor</i>    | Mass   | 33 | 46  | 39.1  | 3.5  | 24397 | 33024 | Yes     |
|              |                             |                               | Wing   | 89 | 103 | 96.1  | 3.8  | 18994 | 33024 | Yes     |
|              |                             |                               | Head   | 38 | 43  | 40.6  | 4.3  | 6220  | 33024 | Unknown |
|              |                             |                               | Culmen | 16 | 22  | 18.6  | 1.9  | 6416  | 33024 | Unknown |
|              |                             |                               | Tarsus | 20 | 27  | 23    | 1.8  | 4631  | 33024 | Unknown |
|              |                             |                               | Tail   | 80 | 95  | 87.4  | 4    | 9096  | 33024 | Yes     |
|              | 725 Eastern Nicator         | <i>Nicator gularis</i>        | Mass   | 34 | 62  | 47.3  | 9.7  | 70    | 110   | Unknown |
|              |                             |                               | Wing   | 89 | 112 | 100.5 | 8.3  | 67    | 110   | Unknown |
|              |                             |                               | Head   | 42 | 49  | 45.6  | 2.3  | 20    | 110   | Unknown |
|              |                             |                               | Culmen | 18 | 25  | 21.6  | 2    | 23    | 110   | Unknown |
|              |                             |                               | Tarsus | 28 | 32  | 29.4  | 1.5  | 14    | 110   | Unknown |
|              |                             |                               | Tail   | 89 | 117 | 100.8 | 13.9 | 37    | 110   | Unknown |
|              | 548 Lowland Tiny Greenbul   | <i>Phyllastrephus debilis</i> | Mass   | 14 | 16  | 14.8  | 0.7  | 18    | 40    | Unknown |
|              |                             |                               | Wing   | 64 | 69  | 66.4  | 1.7  | 7     | 40    | Unknown |
|              | 551 Sombre Greenbul         | <i>Andropadus importunus</i>  | Mass   | 28 | 41  | 34    | 3.3  | 3893  | 6392  | Yes     |
|              |                             |                               | Wing   | 82 | 95  | 88.9  | 3.3  | 3195  | 6392  | Yes     |
|              |                             |                               | Head   | 36 | 41  | 38.3  | 1.5  | 834   | 6392  | Unknown |
|              |                             |                               | Culmen | 14 | 20  | 16.6  | 1.9  | 994   | 6392  | Unknown |

|           |                              |                                     |        |     |     |       |      |      |      |         |
|-----------|------------------------------|-------------------------------------|--------|-----|-----|-------|------|------|------|---------|
| Sturnidae | 549 Stripe-cheeked Greenbul  | <i>Arizelocichla milanjensis</i>    | Tarsus | 21  | 26  | 23.2  | 1.4  | 590  | 6392 | Unknown |
|           |                              |                                     | Tail   | 79  | 94  | 87    | 3.9  | 1266 | 6392 | Yes     |
|           |                              |                                     | Mass   | 34  | 44  | 39    | 2.7  | 303  | 613  | Yes     |
|           |                              |                                     | Wing   | 86  | 99  | 92.8  | 4.4  | 43   | 613  | Unknown |
|           |                              |                                     | Head   | 40  | 44  | 41.6  | 1.2  | 17   | 613  | Unknown |
|           |                              |                                     | Culmen | 19  | 23  | 20.7  | 1.2  | 17   | 613  | Unknown |
|           |                              |                                     | Tarsus | 23  | 26  | 24.5  | 0.8  | 17   | 613  | Unknown |
|           | 546 Terrestrial Brownbul     | <i>Phyllastrephus terrestris</i>    | Tail   | 86  | 94  | 89.1  | 3    | 17   | 613  | Unknown |
|           |                              |                                     | Mass   | 26  | 46  | 34.7  | 5.5  | 2480 | 3850 | Yes     |
|           |                              |                                     | Wing   | 76  | 96  | 86.1  | 5.7  | 2162 | 3850 | Yes     |
|           |                              |                                     | Head   | 39  | 50  | 44.3  | 2.8  | 718  | 3850 | Unknown |
|           |                              |                                     | Culmen | 17  | 27  | 21.3  | 2.6  | 752  | 3850 | Unknown |
|           |                              |                                     | Tarsus | 22  | 27  | 24.3  | 1.4  | 507  | 3850 | Unknown |
|           |                              |                                     | Tail   | 80  | 100 | 89.7  | 5.5  | 1015 | 3850 | Yes     |
|           | 550 Yellow-bellied Greenbul  | <i>Chlorocichla flaviventris</i>    | Mass   | 34  | 54  | 43.3  | 6.3  | 1649 | 2369 | Yes     |
|           |                              |                                     | Wing   | 82  | 110 | 99.4  | 8.7  | 1398 | 2369 | Yes     |
|           |                              |                                     | Head   | 38  | 47  | 43.8  | 6.2  | 486  | 2369 | Unknown |
|           |                              |                                     | Culmen | 16  | 25  | 20.6  | 2.4  | 541  | 2369 | Unknown |
|           |                              |                                     | Tarsus | 22  | 29  | 25.4  | 8.8  | 362  | 2369 | Unknown |
|           |                              |                                     | Tail   | 81  | 106 | 95    | 10.3 | 752  | 2369 | Yes     |
|           |                              |                                     | Mass   | 25  | 39  | 32    | 4.6  | 282  | 487  | Yes     |
|           | 547 Yellow-streaked Greenbul | <i>Phyllastrephus flavostriatus</i> | Wing   | 79  | 101 | 90.1  | 7.8  | 193  | 487  | Unknown |
|           |                              |                                     | Head   | 39  | 80  | 44.8  | 8.3  | 93   | 487  | Unknown |
|           |                              |                                     | Culmen | 16  | 25  | 21.2  | 3.7  | 91   | 487  | Unknown |
|           |                              |                                     | Tarsus | 22  | 28  | 24.1  | 1.6  | 68   | 487  | Unknown |
|           |                              |                                     | Tail   | 19  | 98  | 83.9  | 15.9 | 103  | 487  | Unknown |
|           |                              |                                     | Mass   | 49  | 79  | 60.8  | 8.4  | 410  | 480  | Yes     |
|           |                              |                                     | Wing   | 100 | 120 | 108.7 | 7.8  | 317  | 480  | Yes     |
|           | 740 Black-bellied Starling   | <i>Notopholia corusca</i>           | Head   | 41  | 53  | 45.2  | 5.7  | 135  | 480  | Unknown |
|           |                              |                                     | Culmen | 15  | 24  | 19.8  | 4.2  | 120  | 480  | Unknown |
|           |                              |                                     | Tarsus | 23  | 36  | 26.3  | 7.3  | 64   | 480  | Unknown |
|           |                              |                                     | Tail   | 61  | 93  | 79.1  | 9.3  | 124  | 480  | Unknown |
|           |                              |                                     | Mass   | 90  | 149 | 118   | 16.8 | 231  | 379  | Unknown |
|           |                              |                                     | Wing   | 152 | 197 | 176.5 | 14.2 | 220  | 379  | Unknown |
|           |                              |                                     | Head   | 49  | 59  | 55.1  | 3.2  | 92   | 379  | Unknown |
|           | 743 Burchell's Starling      | <i>Lamprotornis australis</i>       | Culmen | 19  | 36  | 25.4  | 5.5  | 87   | 379  | Unknown |
|           |                              |                                     | Tarsus | 40  | 49  | 44.7  | 4.5  | 44   | 379  | Unknown |
|           |                              |                                     | Tail   | 88  | 191 | 156.2 | 23   | 107  | 379  | Unknown |
|           |                              |                                     | Mass   | 63  | 105 | 80.4  | 10.6 | 2842 | 3953 | Yes     |
|           |                              |                                     | Wing   | 117 | 141 | 128.5 | 7.7  | 2514 | 3953 | Yes     |
|           |                              |                                     | Head   | 46  | 78  | 51.3  | 6.3  | 662  | 3953 | Unknown |
|           |                              |                                     | Culmen | 18  | 31  | 22.6  | 3.3  | 666  | 3953 | Unknown |
|           | 737 Cape Starling            | <i>Lamprotornis nitens</i>          | Tarsus | 29  | 40  | 33.4  | 5    | 526  | 3953 | Unknown |
|           |                              |                                     | Tail   | 73  | 96  | 83.9  | 8    | 960  | 3953 | Yes     |
|           |                              |                                     | Mass   | 25  | 127 | 103   | 18.9 | 572  | 858  | Yes     |
|           | 734 Common Myna              | <i>Acridotheres tristis</i>         |        |     |     |       |      |      |      |         |
|           |                              |                                     |        |     |     |       |      |      |      |         |

|                                 |                                  |        |     |     |       |      |      |      |         |
|---------------------------------|----------------------------------|--------|-----|-----|-------|------|------|------|---------|
| 733 Common Starling             | <i>Sturnus vulgaris</i>          | Wing   | 122 | 147 | 135.8 | 10.3 | 476  | 858  | Unknown |
|                                 |                                  | Head   | 44  | 69  | 54.1  | 6.8  | 184  | 858  | Unknown |
|                                 |                                  | Culmen | 20  | 35  | 25.2  | 7.3  | 178  | 858  | Unknown |
|                                 |                                  | Tarsus | 29  | 44  | 37    | 3.5  | 128  | 858  | Unknown |
|                                 |                                  | Tail   | 58  | 95  | 82.8  | 9.6  | 224  | 858  | Unknown |
|                                 |                                  | Mass   | 16  | 92  | 75.8  | 13.5 | 1005 | 3846 | No      |
|                                 |                                  | Wing   | 60  | 133 | 120.9 | 17.7 | 392  | 3846 | No      |
|                                 |                                  | Head   | 30  | 56  | 52.4  | 4.7  | 80   | 3846 | Unknown |
|                                 |                                  | Culmen | 13  | 30  | 24.4  | 3.2  | 78   | 3846 | Unknown |
|                                 |                                  | Tarsus | 27  | 35  | 30.1  | 2.2  | 46   | 3846 | Unknown |
| 738 Greater Blue-eared Starling | <i>Lamprotornis chalybaeus</i>   | Tail   | 58  | 70  | 63.9  | 2.8  | 149  | 3846 | Unknown |
|                                 |                                  | Mass   | 62  | 92  | 75.5  | 8.4  | 343  | 492  | Unknown |
|                                 |                                  | Wing   | 120 | 139 | 129.1 | 5.6  | 265  | 492  | Unknown |
|                                 |                                  | Head   | 46  | 52  | 48.8  | 1.8  | 170  | 492  | Unknown |
|                                 |                                  | Culmen | 16  | 23  | 19    | 1.7  | 177  | 492  | Unknown |
|                                 |                                  | Tarsus | 29  | 36  | 32.5  | 1.8  | 176  | 492  | Unknown |
|                                 |                                  | Tail   | 80  | 93  | 86.3  | 4.4  | 38   | 492  | Unknown |
|                                 |                                  | Mass   | 55  | 67  | 60.5  | 3.3  | 29   | 78   | Unknown |
|                                 |                                  | Wing   | 113 | 125 | 118.8 | 3.8  | 16   | 78   | Unknown |
|                                 |                                  | Head   | 44  | 47  | 45.6  | 1.2  | 13   | 78   | Unknown |
| 739 Lesser Blue-eared Starling  | <i>Lamprotornis chloropterus</i> | Culmen | 19  | 27  | 24.2  | 2.7  | 16   | 78   | Unknown |
|                                 |                                  | Tarsus | 26  | 29  | 27.9  | 0.9  | 17   | 78   | Unknown |
|                                 |                                  | Tail   | 66  | 80  | 74.6  | 4.2  | 16   | 78   | Unknown |
|                                 |                                  | Mass   | 60  | 95  | 75.7  | 12   | 716  | 865  | No      |
|                                 |                                  | Wing   | 127 | 157 | 141.8 | 12   | 688  | 865  | Yes     |
|                                 |                                  | Head   | 45  | 51  | 48    | 3.5  | 296  | 865  | Unknown |
|                                 |                                  | Culmen | 17  | 27  | 24.4  | 19.8 | 276  | 865  | Unknown |
|                                 |                                  | Tarsus | 34  | 46  | 39.3  | 3.1  | 171  | 865  | Unknown |
|                                 |                                  | Tail   | 138 | 225 | 190.1 | 23.3 | 398  | 865  | Yes     |
|                                 |                                  | Mass   | 76  | 115 | 96.7  | 9.7  | 466  | 644  | Unknown |
| 744 Pale-winged Starling        | <i>Onychognathus nabouroup</i>   | Wing   | 130 | 151 | 141.2 | 5.5  | 367  | 644  | Unknown |
|                                 |                                  | Head   | 51  | 57  | 54.4  | 2.5  | 111  | 644  | Unknown |
|                                 |                                  | Culmen | 20  | 30  | 24    | 2.9  | 66   | 644  | Unknown |
|                                 |                                  | Tarsus | 28  | 34  | 31.5  | 1.6  | 123  | 644  | Unknown |
|                                 |                                  | Tail   | 95  | 114 | 103.3 | 4.8  | 157  | 644  | Unknown |
|                                 |                                  | Mass   | 84  | 126 | 104.5 | 12.6 | 679  | 1241 | No      |
|                                 |                                  | Wing   | 115 | 164 | 152   | 11.8 | 487  | 1241 | Yes     |
|                                 |                                  | Head   | 28  | 58  | 53.1  | 5.9  | 122  | 1241 | Unknown |
|                                 |                                  | Culmen | 20  | 92  | 27.2  | 13.4 | 115  | 1241 | Unknown |
|                                 |                                  | Tarsus | 35  | 46  | 40.1  | 2.6  | 89   | 1241 | Unknown |
| 746 Pied Starling               | <i>Lamprotornis bicolor</i>      | Tail   | 90  | 110 | 97.9  | 7.8  | 235  | 1241 | Unknown |
|                                 |                                  | Mass   | 42  | 57  | 48.8  | 4.7  | 1139 | 2297 | Yes     |
|                                 |                                  | Wing   | 114 | 126 | 120.2 | 3.2  | 663  | 2297 | Yes     |
|                                 |                                  | Head   | 39  | 44  | 41.4  | 2.7  | 410  | 2297 | Unknown |
|                                 |                                  | Culmen | 17  | 22  | 20.2  | 1.2  | 445  | 2297 | Unknown |
| 748 Red-billed Oxpecker         | <i>Buphagus erythrorhynchus</i>  |        |     |     |       |      |      |      |         |
|                                 |                                  |        |     |     |       |      |      |      |         |
|                                 |                                  |        |     |     |       |      |      |      |         |
|                                 |                                  |        |     |     |       |      |      |      |         |
|                                 |                                  |        |     |     |       |      |      |      |         |

|           |                            |                                   |        |     |     |       |      |       |       |         |
|-----------|----------------------------|-----------------------------------|--------|-----|-----|-------|------|-------|-------|---------|
| Sylviidae | 745 Red-winged Starling    | <i>Onychognathus morio</i>        | Tarsus | 20  | 24  | 21.5  | 2.2  | 372   | 2297  | Unknown |
|           |                            |                                   | Tail   | 88  | 104 | 95    | 4    | 497   | 2297  | Yes     |
|           |                            |                                   | Mass   | 107 | 154 | 131.6 | 11.8 | 1751  | 3186  | Yes     |
|           |                            |                                   | Wing   | 130 | 157 | 144.9 | 7    | 1346  | 3186  | Yes     |
|           |                            |                                   | Head   | 54  | 64  | 60.2  | 6.5  | 222   | 3186  | Unknown |
|           |                            |                                   | Culmen | 25  | 37  | 30.9  | 3.6  | 239   | 3186  | Unknown |
|           |                            |                                   | Tarsus | 29  | 40  | 35.1  | 6.5  | 260   | 3186  | Unknown |
|           | 736 Violet-backed Starling | <i>Cinnyricinclus leucogaster</i> | Tail   | 108 | 139 | 123.5 | 8.8  | 699   | 3186  | Yes     |
|           |                            |                                   | Mass   | 31  | 52  | 41.5  | 6.6  | 663   | 971   | No      |
|           |                            |                                   | Wing   | 95  | 113 | 104   | 5.3  | 547   | 971   | Yes     |
|           |                            |                                   | Head   | 37  | 42  | 39.5  | 1.4  | 217   | 971   | Unknown |
|           |                            |                                   | Culmen | 13  | 22  | 17.3  | 3.2  | 244   | 971   | Unknown |
|           |                            |                                   | Tarsus | 20  | 61  | 24.7  | 9.7  | 175   | 971   | Unknown |
|           |                            |                                   | Tail   | 53  | 67  | 60    | 4.1  | 268   | 971   | Yes     |
|           | 735 Wattled Starling       | <i>Creatophora cinerea</i>        | Mass   | 59  | 87  | 72.6  | 8.5  | 2108  | 3502  | Yes     |
|           |                            |                                   | Wing   | 110 | 126 | 117.9 | 6.8  | 1375  | 3502  | Yes     |
|           |                            |                                   | Head   | 47  | 52  | 49.3  | 1.4  | 215   | 3502  | Unknown |
|           |                            |                                   | Culmen | 20  | 30  | 25.1  | 2.7  | 217   | 3502  | Unknown |
|           |                            |                                   | Tarsus | 27  | 33  | 29.8  | 2.5  | 153   | 3502  | Unknown |
|           |                            |                                   | Tail   | 61  | 75  | 67.5  | 3.3  | 246   | 3502  | Yes     |
|           |                            |                                   | Mass   | 57  | 67  | 60.9  | 3.5  | 12    | 72    | Unknown |
|           | 747 Yellow-billed Oxpecker | <i>Buphagus africanus</i>         | Wing   | 125 | 132 | 129.2 | 2.4  | 13    | 72    | Unknown |
|           |                            |                                   | Head   | 42  | 44  | 43.1  | 0.7  | 8     | 72    | Unknown |
|           |                            |                                   | Culmen | 16  | 19  | 17.3  | 1.4  | 8     | 72    | Unknown |
|           |                            |                                   | Tarsus | 24  | 25  | 24.7  | 0.2  | 5     | 72    | Unknown |
|           |                            |                                   | Tail   | 94  | 100 | 96.8  | 2.1  | 8     | 72    | Unknown |
|           | 606 African Reed Warbler   | <i>Acrocephalus baeticatus</i>    | Mass   | 9   | 12  | 10.3  | 1    | 18288 | 25937 | Yes     |
|           |                            |                                   | Wing   | 55  | 63  | 58.8  | 2    | 14606 | 25937 | Yes     |
|           |                            |                                   | Head   | 31  | 35  | 32.7  | 1    | 3203  | 25937 | Unknown |
|           |                            |                                   | Culmen | 12  | 19  | 15.5  | 2.1  | 3484  | 25937 | Unknown |
|           |                            |                                   | Tarsus | 20  | 26  | 22.5  | 1.3  | 2461  | 25937 | Unknown |
|           |                            |                                   | Tail   | 47  | 57  | 51.9  | 2.6  | 5645  | 25937 | Yes     |
|           | 533 Arrow-marked Babbler   | <i>Turdoides jardineii</i>        | Mass   | 63  | 91  | 76.6  | 7    | 1760  | 2359  | No      |
|           |                            |                                   | Wing   | 98  | 118 | 109.2 | 5.7  | 1537  | 2359  | No      |
|           |                            |                                   | Head   | 46  | 107 | 52.8  | 13.4 | 702   | 2359  | Unknown |
|           |                            |                                   | Culmen | 20  | 35  | 24.7  | 6.6  | 735   | 2359  | Unknown |
|           |                            |                                   | Tarsus | 30  | 49  | 36    | 14.1 | 564   | 2359  | Unknown |
|           |                            |                                   | Tail   | 24  | 117 | 102.5 | 18.8 | 823   | 2359  | No      |
|           | 666 African Yellow Warbler | <i>Iduna natalensis</i>           | Mass   | 10  | 16  | 12.4  | 1.5  | 681   | 1062  | No      |
|           |                            |                                   | Wing   | 57  | 65  | 61    | 1.9  | 507   | 1062  | No      |
|           |                            |                                   | Head   | 29  | 33  | 31.2  | 2.2  | 163   | 1062  | Unknown |
|           |                            |                                   | Culmen | 11  | 17  | 14.7  | 1.8  | 205   | 1062  | Unknown |
|           |                            |                                   | Tarsus | 20  | 25  | 21.6  | 1.6  | 116   | 1062  | Unknown |
|           |                            |                                   | Tail   | 54  | 68  | 61.5  | 3.7  | 246   | 1062  | No      |
|           |                            |                                   | Mass   | 67  | 83  | 77.2  | 7.1  | 7     | 13    | Unknown |
|           | 534 Arrow-marked Babbler   | <i>Turdoides jardineii</i>        |        |     |     |       |      |       |       |         |

|                             |                                |        |     |     |       |     |      |      |         |
|-----------------------------|--------------------------------|--------|-----|-----|-------|-----|------|------|---------|
| 537 Bare-cheeked Babbler    | <i>Turdoides gymnogenys</i>    | Wing   | 108 | 118 | 115.9 | 4.4 | 7    | 13   | Unknown |
|                             |                                | Head   | 52  | 52  | 52.4  | 0.2 | 2    | 13   | Unknown |
|                             |                                | Culmen | 28  | 28  | 28.2  | 0.4 | 2    | 13   | Unknown |
|                             |                                | Tail   | 118 | 121 | 119.5 | 2.1 | 2    | 13   | Unknown |
|                             |                                | Mass   | 62  | 89  | 74.8  | 6.5 | 90   | 126  | Unknown |
|                             |                                | Wing   | 104 | 119 | 112.5 | 3.9 | 86   | 126  | Unknown |
|                             |                                | Head   | 52  | 54  | 52.9  | 0.7 | 11   | 126  | Unknown |
|                             |                                | Culmen | 22  | 29  | 26.9  | 2.2 | 11   | 126  | Unknown |
|                             |                                | Tarsus | 33  | 36  | 34.3  | 1.1 | 8    | 126  | Unknown |
|                             |                                | Tail   | 98  | 108 | 102.3 | 3.2 | 15   | 126  | Unknown |
| 610 Barratt's Warbler       | <i>Bradypterus barratti</i>    | Mass   | 15  | 25  | 19.5  | 2.5 | 97   | 159  | Unknown |
|                             |                                | Wing   | 51  | 69  | 63.2  | 7.3 | 76   | 159  | Unknown |
|                             |                                | Head   | 33  | 36  | 34.4  | 0.8 | 24   | 159  | Unknown |
|                             |                                | Culmen | 12  | 27  | 16    | 4.9 | 18   | 159  | Unknown |
|                             |                                | Tarsus | 20  | 23  | 22.2  | 1   | 21   | 159  | Unknown |
| 949 Basra Reed Warbler      | <i>Acrocephalus griseldis</i>  | Tail   | 56  | 80  | 69.6  | 7.3 | 30   | 159  | Unknown |
|                             |                                | Mass   | 15  | 20  | 17.8  | 1.3 | 32   | 81   | Unknown |
|                             |                                | Wing   | 79  | 79  | 79    | NA  | 1    | 81   | Unknown |
| 601 Burnt-necked Eremomela  | <i>Eremomela usticollis</i>    | Mass   | 7   | 12  | 8.6   | 3.3 | 244  | 355  | No      |
|                             |                                | Wing   | 50  | 58  | 54.2  | 2.2 | 215  | 355  | No      |
|                             |                                | Head   | 27  | 29  | 27.7  | 0.7 | 86   | 355  | Unknown |
|                             |                                | Culmen | 10  | 16  | 12.8  | 2.4 | 87   | 355  | Unknown |
|                             |                                | Tarsus | 19  | 26  | 21.3  | 3.2 | 55   | 355  | Unknown |
| 542 Bush Blackcap           | <i>Lioptilus nigricapillus</i> | Tail   | 21  | 48  | 42.3  | 5.9 | 99   | 355  | Unknown |
|                             |                                | Mass   | 25  | 38  | 30.4  | 5   | 186  | 238  | Unknown |
|                             |                                | Wing   | 76  | 88  | 82.2  | 6.4 | 181  | 238  | Unknown |
|                             |                                | Head   | 34  | 37  | 35.7  | 0.7 | 31   | 238  | Unknown |
|                             |                                | Culmen | 12  | 19  | 15.1  | 2.1 | 37   | 238  | Unknown |
|                             |                                | Tarsus | 23  | 27  | 24.6  | 1.2 | 16   | 238  | Unknown |
|                             |                                | Tail   | 71  | 85  | 77.7  | 3.9 | 43   | 238  | Unknown |
| 618 Cape Grassbird          | <i>Sphenoeacus afer</i>        | Mass   | 26  | 37  | 31.3  | 2.7 | 524  | 818  | No      |
|                             |                                | Wing   | 64  | 78  | 71    | 3.7 | 439  | 818  | Yes     |
|                             |                                | Head   | 37  | 42  | 39.5  | 1.3 | 157  | 818  | Unknown |
|                             |                                | Culmen | 14  | 20  | 17    | 1.7 | 190  | 818  | Unknown |
|                             |                                | Tarsus | 22  | 28  | 24.6  | 1.5 | 149  | 818  | Unknown |
| 658 Chestnut-vented Warbler | <i>Sylvia subcoerulea</i>      | Tail   | 85  | 114 | 101.1 | 8.1 | 218  | 818  | Unknown |
|                             |                                | Mass   | 12  | 19  | 15.4  | 5.1 | 5319 | 6547 | No      |
|                             |                                | Wing   | 60  | 72  | 66.1  | 4.5 | 4300 | 6547 | Yes     |
|                             |                                | Head   | 22  | 35  | 31.6  | 6.1 | 982  | 6547 | Unknown |
|                             |                                | Culmen | 10  | 22  | 13.8  | 6   | 1081 | 6547 | Unknown |
|                             |                                | Tarsus | 19  | 25  | 21.7  | 1.5 | 816  | 6547 | Unknown |
| 594 Common Whitethroat      | <i>Sylvia communis</i>         | Tail   | 58  | 75  | 68.1  | 7.2 | 1581 | 6547 | No      |
|                             |                                | Mass   | 13  | 21  | 15.7  | 5.3 | 265  | 759  | No      |
|                             |                                | Wing   | 65  | 77  | 71.9  | 5   | 217  | 759  | No      |
|                             |                                | Head   | 30  | 33  | 32    | 5.2 | 82   | 759  | Unknown |

|                            |                                  |        |     |      |       |       |      |      |         |
|----------------------------|----------------------------------|--------|-----|------|-------|-------|------|------|---------|
|                            |                                  | Tarsus | 20  | 23   | 21.3  | 1     | 60   | 759  | Unknown |
|                            |                                  | Tail   | 56  | 71   | 62.6  | 6.2   | 103  | 759  | No      |
|                            |                                  | Culmen | 11  | 16   | 14.7  | 8     | 85   | 759  | Unknown |
| 911 Eurasian Reed Warbler  | <i>Acrocephalus scirpaceus</i>   | Mass   | 11  | 11.7 | 11.35 | 0.495 | 2    | 393  | Unknown |
|                            |                                  | Wing   | 65  | 65   | 65    | NA    | 1    | 393  | Unknown |
| 678 Fairy Flycatcher       | <i>Stenostira scita</i>          | Mass   | 5   | 7    | 6.2   | 0.5   | 268  | 378  | Unknown |
|                            |                                  | Wing   | 48  | 55   | 51.2  | 1.8   | 201  | 378  | Unknown |
|                            |                                  | Head   | 25  | 28   | 26.7  | 0.7   | 51   | 378  | Unknown |
|                            |                                  | Culmen | 8   | 19   | 11.3  | 2.7   | 68   | 378  | Unknown |
|                            |                                  | Tarsus | 17  | 21   | 18.7  | 1     | 58   | 378  | Unknown |
|                            |                                  | Tail   | 50  | 60   | 54.7  | 2.4   | 84   | 378  | Unknown |
| 616 Fan-tailed Grassbird   | <i>Catriscus brevirostris</i>    | Mass   | 13  | 16   | 14.6  | 0.6   | 22   | 52   | Unknown |
|                            |                                  | Wing   | 59  | 62   | 60.6  | 1.3   | 23   | 52   | Unknown |
|                            |                                  | Head   | 29  | 30   | 29.6  | 0.5   | 13   | 52   | Unknown |
|                            |                                  | Culmen | 14  | 16   | 14.7  | 0.8   | 13   | 52   | Unknown |
|                            |                                  | Tarsus | 19  | 20   | 19.2  | 0.5   | 13   | 52   | Unknown |
|                            |                                  | Tail   | 77  | 83   | 79.6  | 2.2   | 11   | 52   | Unknown |
| 595 Garden Warbler         | <i>Sylvia borin</i>              | Wing   | 70  | 85   | 78.8  | 3.7   | 919  | 3568 | Unknown |
|                            |                                  | Culmen | 10  | 18   | 13.7  | 2.4   | 280  | 3568 | Unknown |
|                            |                                  | Tarsus | 19  | 57   | 22.6  | 7.9   | 240  | 3568 | Unknown |
|                            |                                  | Mass   | 16  | 26   | 19.5  | 2.5   | 1255 | 3568 | Unknown |
|                            |                                  | Head   | 31  | 38   | 33.1  | 3.1   | 285  | 3568 | Unknown |
|                            |                                  | Tail   | 49  | 68   | 57.5  | 5.5   | 391  | 3568 | Unknown |
| 603 Great Reed Warbler     | <i>Acrocephalus arundinaceus</i> | Tarsus | 26  | 36   | 29.3  | 2.6   | 184  | 3171 | Unknown |
|                            |                                  | Tail   | 42  | 88   | 75.6  | 9.4   | 364  | 3171 | Yes     |
|                            |                                  | Mass   | 20  | 41   | 30.6  | 7.4   | 1449 | 3171 | Yes     |
|                            |                                  | Wing   | 69  | 102  | 92.6  | 9.5   | 980  | 3171 | Yes     |
|                            |                                  | Head   | 38  | 48   | 43.9  | 4.5   | 281  | 3171 | Unknown |
|                            |                                  | Culmen | 16  | 29   | 22.6  | 6.6   | 291  | 3171 | Unknown |
| 912 Greater Swamp Warbler  | <i>Acrocephalus rufescens</i>    | Mass   | 18  | 31   | 22.8  | 4.2   | 10   | 32   | Unknown |
|                            |                                  | Wing   | 71  | 97   | 78.6  | 9.8   | 10   | 32   | Unknown |
|                            |                                  | Culmen | 21  | 23   | 22    | 1.1   | 5    | 32   | Unknown |
|                            |                                  | Tail   | 76  | 89   | 81.6  | 5.3   | 5    | 32   | Unknown |
| 602 Green-capped Eremomela | <i>Eremomela scotops</i>         | Mass   | 8   | 10   | 8.9   | 0.7   | 29   | 53   | Unknown |
|                            |                                  | Wing   | 57  | 61   | 59.8  | 1.5   | 8    | 53   | Unknown |
|                            |                                  | Head   | 29  | 29   | 28.9  | 0.3   | 5    | 53   | Unknown |
|                            |                                  | Culmen | 13  | 16   | 15.1  | 1.2   | 5    | 53   | Unknown |
|                            |                                  | Tarsus | 18  | 19   | 18.5  | 0.4   | 5    | 53   | Unknown |
|                            |                                  | Tail   | 47  | 50   | 48.2  | 1.3   | 5    | 53   | Unknown |
| 535 Hartlaub's Babbler     | <i>Turdoides hartlaubii</i>      | Mass   | 68  | 105  | 83.8  | 10.1  | 113  | 136  | Unknown |
|                            |                                  | Wing   | 106 | 122  | 114.8 | 4.4   | 93   | 136  | Unknown |
|                            |                                  | Head   | 48  | 52   | 49.5  | 1.1   | 32   | 136  | Unknown |
|                            |                                  | Culmen | 20  | 27   | 24.3  | 2.3   | 38   | 136  | Unknown |
|                            |                                  | Tarsus | 34  | 39   | 36.5  | 1.4   | 27   | 136  | Unknown |
|                            |                                  | Tail   | 103 | 120  | 112   | 4.8   | 46   | 136  | Unknown |

|                              |                                    |        |    |    |      |     |       |       |         |
|------------------------------|------------------------------------|--------|----|----|------|-----|-------|-------|---------|
| 596 Icterine Warbler         | <i>Hippolais icterina</i>          | Tarsus | 19 | 24 | 21.2 | 1.2 | 48    | 471   | Unknown |
|                              |                                    | Mass   | 10 | 21 | 13.5 | 2.5 | 249   | 471   | Unknown |
|                              |                                    | Wing   | 59 | 82 | 74   | 9.8 | 175   | 471   | Unknown |
|                              |                                    | Head   | 29 | 38 | 33.6 | 3.1 | 61    | 471   | Unknown |
|                              |                                    | Culmen | 11 | 19 | 15.7 | 2.4 | 63    | 471   | Unknown |
| 611 Knysna Warbler           | <i>Bradypterus sylvaticus</i>      | Tail   | 48 | 61 | 54.5 | 2.9 | 71    | 471   | Unknown |
|                              |                                    | Mass   | 15 | 24 | 17.3 | 3.2 | 28    | 34    | Unknown |
|                              |                                    | Wing   | 56 | 62 | 59.5 | 2.1 | 25    | 34    | Unknown |
|                              |                                    | Head   | 33 | 36 | 34.4 | 1.1 | 21    | 34    | Unknown |
|                              |                                    | Culmen | 11 | 16 | 13.4 | 1.5 | 21    | 34    | Unknown |
| 659 Layard's Warbler         | <i>Sylvia layardi</i>              | Tarsus | 20 | 24 | 21   | 1.3 | 18    | 34    | Unknown |
|                              |                                    | Tail   | 51 | 69 | 59.9 | 4.5 | 23    | 34    | Unknown |
|                              |                                    | Mass   | 11 | 16 | 13.5 | 1.2 | 189   | 255   | Unknown |
|                              |                                    | Wing   | 60 | 68 | 64.9 | 2.1 | 153   | 255   | Unknown |
|                              |                                    | Head   | 29 | 32 | 30.9 | 0.8 | 27    | 255   | Unknown |
| 604 Lesser Swamp Warbler     | <i>Acrocephalus gracilirostris</i> | Culmen | 9  | 13 | 10.8 | 1.3 | 45    | 255   | Unknown |
|                              |                                    | Tarsus | 19 | 21 | 20.6 | 0.6 | 36    | 255   | Unknown |
|                              |                                    | Tail   | 57 | 69 | 63.4 | 3.5 | 56    | 255   | Unknown |
|                              |                                    | Mass   | 14 | 22 | 17.8 | 1.9 | 11356 | 16558 | Yes     |
|                              |                                    | Wing   | 64 | 77 | 71.4 | 3.5 | 9465  | 16558 | Yes     |
| 609 Little Rush Warbler      | <i>Bradypterus baboecala</i>       | Head   | 35 | 41 | 38.4 | 2.1 | 1897  | 16558 | Unknown |
|                              |                                    | Culmen | 14 | 22 | 17.7 | 2.5 | 1996  | 16558 | Unknown |
|                              |                                    | Tarsus | 24 | 32 | 27.8 | 2.1 | 1475  | 16558 | Unknown |
|                              |                                    | Tail   | 57 | 76 | 67.5 | 4.9 | 3996  | 16558 | Yes     |
|                              |                                    | Mass   | 12 | 19 | 15.3 | 1.9 | 2600  | 3887  | Yes     |
| 621 Long-billed Crombec      | <i>Sylvietta rufescens</i>         | Wing   | 55 | 67 | 59.9 | 3.2 | 2336  | 3887  | No      |
|                              |                                    | Head   | 31 | 38 | 34.5 | 1.9 | 543   | 3887  | Unknown |
|                              |                                    | Culmen | 12 | 20 | 15.2 | 1.8 | 631   | 3887  | Unknown |
|                              |                                    | Tarsus | 20 | 28 | 23.3 | 2.1 | 383   | 3887  | Unknown |
|                              |                                    | Tail   | 59 | 78 | 68.9 | 5.1 | 998   | 3887  | Unknown |
| 607 Marsh Warbler            | <i>Acrocephalus palustris</i>      | Mass   | 10 | 17 | 12.6 | 5.8 | 2291  | 3161  | No      |
|                              |                                    | Wing   | 54 | 67 | 60.1 | 6.3 | 1950  | 3161  | Yes     |
|                              |                                    | Head   | 27 | 34 | 31.5 | 2.7 | 632   | 3161  | Unknown |
|                              |                                    | Culmen | 12 | 19 | 15.3 | 2.2 | 660   | 3161  | Unknown |
|                              |                                    | Tarsus | 18 | 24 | 20.4 | 1.8 | 466   | 3161  | Unknown |
| 617 Moustached Grass Warbler | <i>Melocichla mentalis</i>         | Tail   | 20 | 33 | 27   | 3.9 | 868   | 3161  | No      |
|                              |                                    | Mass   | 10 | 16 | 12.4 | 5.4 | 1334  | 2109  | Unknown |
|                              |                                    | Wing   | 59 | 72 | 66.6 | 5.4 | 1066  | 2109  | Unknown |
|                              |                                    | Head   | 31 | 36 | 33.3 | 2.3 | 335   | 2109  | Unknown |
|                              |                                    | Culmen | 12 | 19 | 15.6 | 2   | 373   | 2109  | Unknown |
|                              |                                    | Tarsus | 20 | 26 | 22.8 | 3.1 | 273   | 2109  | Unknown |
|                              |                                    | Tail   | 41 | 60 | 52.6 | 5   | 426   | 2109  | Unknown |
|                              |                                    | Mass   | 34 | 38 | 36.2 | 2.1 | 3     | 60    | Unknown |
|                              |                                    | Wing   | 80 | 81 | 80.3 | 0.6 | 3     | 60    | Unknown |
|                              |                                    | Head   | 40 | 40 | 39.8 | 0.1 | 3     | 60    | Unknown |



|                                     |                                   |        |    |     |       |      |      |      |         |
|-------------------------------------|-----------------------------------|--------|----|-----|-------|------|------|------|---------|
| 597 Olive-tree Warbler              | <i>Hippolais olivetorum</i>       | Culmen | 20 | 21  | 20.5  | 0.5  | 3    | 60   | Unknown |
|                                     |                                   | Tarsus | 29 | 30  | 29.3  | 0.4  | 3    | 60   | Unknown |
|                                     |                                   | Tail   | 96 | 97  | 96.5  | 0.7  | 2    | 60   | Unknown |
|                                     |                                   | Mass   | 16 | 22  | 18.5  | 1.8  | 31   | 70   | Unknown |
|                                     |                                   | Wing   | 81 | 88  | 85.2  | 2.3  | 26   | 70   | Unknown |
|                                     |                                   | Head   | 38 | 39  | 38.8  | 0.5  | 7    | 70   | Unknown |
|                                     |                                   | Culmen | 19 | 22  | 20.3  | 1.1  | 7    | 70   | Unknown |
|                                     |                                   | Tarsus | 23 | 24  | 23.4  | 1    | 3    | 70   | Unknown |
| 913 Red-faced Crombec               | <i>Sylvietta whytii</i>           | Tail   | 62 | 71  | 67.4  | 3.3  | 8    | 70   | Unknown |
|                                     |                                   | Mass   | 10 | 11  | 10.8  | 0.3  | 6    | 18   | Unknown |
| 598 River Warbler                   | <i>Locustella fluviatilis</i>     | Mass   | 15 | 19  | 16.9  | 1.7  | 4    | 38   | Unknown |
|                                     |                                   | Wing   | 72 | 76  | 73.8  | 1.5  | 5    | 38   | Unknown |
|                                     |                                   | Head   | 33 | 34  | 33.3  | 0.4  | 3    | 38   | Unknown |
|                                     |                                   | Culmen | 14 | 16  | 14.8  | 1.2  | 3    | 38   | Unknown |
|                                     |                                   | Tarsus | 21 | 21  | 21.3  | NA   | 1    | 38   | Unknown |
|                                     |                                   | Tail   | 55 | 58  | 56    | 1.7  | 3    | 38   | Unknown |
| 539 Rockrunner                      | <i>Achaetops pycnopygius</i>      | Mass   | 26 | 35  | 30.4  | 2.5  | 20   | 30   | Unknown |
|                                     |                                   | Wing   | 66 | 73  | 69.6  | 2.3  | 18   | 30   | Unknown |
|                                     |                                   | Head   | 40 | 40  | 40.1  | 0.3  | 3    | 30   | Unknown |
|                                     |                                   | Culmen | 19 | 21  | 20.1  | 1.1  | 3    | 30   | Unknown |
|                                     |                                   | Tarsus | 24 | 25  | 24.4  | 0.5  | 3    | 30   | Unknown |
|                                     |                                   | Tail   | 73 | 87  | 78.7  | 8.1  | 3    | 30   | Unknown |
| 608 Sedge Warbler                   | <i>Acrocephalus schoenobaenus</i> | Mass   | 10 | 15  | 11.7  | 1.8  | 2567 | 5331 | No      |
|                                     |                                   | Wing   | 59 | 72  | 66.2  | 3.7  | 1706 | 5331 | Unknown |
|                                     |                                   | Head   | 21 | 40  | 31.7  | 4.1  | 235  | 5331 | Unknown |
|                                     |                                   | Culmen | 10 | 20  | 14.7  | 4.7  | 271  | 5331 | Unknown |
|                                     |                                   | Tarsus | 18 | 31  | 22.1  | 3.4  | 127  | 5331 | Unknown |
|                                     |                                   | Tail   | 22 | 61  | 48.6  | 7.7  | 344  | 5331 | Unknown |
| 536 Southern Pied Babbler           | <i>Turdoides bicolor</i>          | Mass   | 37 | 90  | 75.5  | 10.7 | 215  | 577  | Unknown |
|                                     |                                   | Wing   | 75 | 116 | 108.9 | 9.4  | 147  | 577  | Unknown |
|                                     |                                   | Head   | 49 | 69  | 54    | 9.3  | 70   | 577  | Unknown |
|                                     |                                   | Culmen | 23 | 32  | 27.3  | 3.5  | 80   | 577  | Unknown |
|                                     |                                   | Tarsus | 33 | 38  | 36.6  | 10.6 | 50   | 577  | Unknown |
|                                     |                                   | Tail   | 32 | 122 | 109.9 | 16.6 | 83   | 577  | Unknown |
| 612 Victorin's Warbler              | <i>Cryptillas victorini</i>       | Mass   | 15 | 20  | 17.3  | 1.3  | 102  | 117  | Unknown |
|                                     |                                   | Wing   | 52 | 61  | 56    | 2.4  | 101  | 117  | Unknown |
|                                     |                                   | Head   | 32 | 35  | 33.9  | 0.8  | 44   | 117  | Unknown |
|                                     |                                   | Culmen | 10 | 15  | 12.3  | 1.2  | 83   | 117  | Unknown |
|                                     |                                   | Tarsus | 21 | 22  | 21.6  | 0.6  | 42   | 117  | Unknown |
|                                     |                                   | Tail   | 69 | 89  | 77.2  | 5.1  | 76   | 117  | Unknown |
| 681 White-tailed Crested Flycatcher | <i>Elminia albonotata</i>         | Mass   | 7  | 10  | 8.6   | 0.7  | 76   | 224  | Unknown |
|                                     |                                   | Wing   | 60 | 67  | 63.9  | 2.1  | 9    | 224  | Unknown |
|                                     |                                   | Head   | 26 | 28  | 27.2  | 0.7  | 7    | 224  | Unknown |
|                                     |                                   | Culmen | 13 | 14  | 13.2  | 0.4  | 6    | 224  | Unknown |
|                                     |                                   | Tarsus | 18 | 21  | 19.1  | 1    | 7    | 224  | Unknown |

|          |                                      |                                 |        |    |     |       |      |      |      |         |
|----------|--------------------------------------|---------------------------------|--------|----|-----|-------|------|------|------|---------|
| Viduidae | 599 Willow Warbler                   | <i>Phylloscopus trochilus</i>   | Tail   | 67 | 75  | 71.6  | 3.1  | 7    | 224  | Unknown |
|          |                                      |                                 | Mass   | 7  | 17  | 10.3  | 10   | 5436 | 7079 | No      |
|          |                                      |                                 | Wing   | 58 | 72  | 65.7  | 4.8  | 3414 | 7079 | Yes     |
|          |                                      |                                 | Head   | 25 | 33  | 28.2  | 3.5  | 905  | 7079 | Unknown |
|          |                                      |                                 | Culmen | 8  | 19  | 12    | 3.2  | 976  | 7079 | Unknown |
|          | 600 Yellow-bellied Eremomela         | <i>Eremomela icteropygialis</i> | Tarsus | 18 | 28  | 20.3  | 4.5  | 689  | 7079 | Unknown |
|          |                                      |                                 | Tail   | 36 | 57  | 49.9  | 5.6  | 1226 | 7079 | Yes     |
|          |                                      |                                 | Mass   | 6  | 19  | 9.1   | 8.5  | 277  | 358  | No      |
|          |                                      |                                 | Wing   | 50 | 60  | 55.3  | 5.3  | 201  | 358  | Unknown |
|          |                                      |                                 | Head   | 24 | 32  | 26.2  | 1.7  | 54   | 358  | Unknown |
|          | 671 Yellow-throated Woodland Warbler | <i>Phylloscopus ruficapilla</i> | Culmen | 9  | 17  | 12.4  | 1.8  | 59   | 358  | Unknown |
|          |                                      |                                 | Tarsus | 17 | 19  | 18.2  | 0.8  | 42   | 358  | Unknown |
|          |                                      |                                 | Tail   | 34 | 42  | 37.2  | 3.2  | 79   | 358  | Unknown |
|          |                                      |                                 | Mass   | 7  | 10  | 8.1   | 0.8  | 406  | 558  | No      |
|          |                                      |                                 | Wing   | 50 | 58  | 54.1  | 2.3  | 343  | 558  | Unknown |
|          | 854 Cuckoo-finch                     | <i>Anomalospiza imberbis</i>    | Head   | 27 | 29  | 28    | 0.7  | 153  | 558  | Unknown |
|          |                                      |                                 | Culmen | 10 | 15  | 12.2  | 1.8  | 91   | 558  | Unknown |
|          |                                      |                                 | Tarsus | 18 | 21  | 20    | 0.8  | 121  | 558  | Unknown |
|          |                                      |                                 | Tail   | 39 | 48  | 43.4  | 2.4  | 176  | 558  | Unknown |
|          |                                      |                                 | Mass   | 19 | 25  | 21.5  | 1.7  | 347  | 1868 | Yes     |
|          | 849 Dusky Indigobird                 | <i>Vidua funerea</i>            | Wing   | 69 | 77  | 72.2  | 2.3  | 28   | 1868 | Unknown |
|          |                                      |                                 | Head   | 26 | 28  | 27.5  | 0.6  | 8    | 1868 | Unknown |
|          |                                      |                                 | Culmen | 13 | 16  | 14.2  | 1.2  | 8    | 1868 | Unknown |
|          |                                      |                                 | Tarsus | 17 | 19  | 18.2  | 0.5  | 9    | 1868 | Unknown |
|          |                                      |                                 | Tail   | 38 | 41  | 39.7  | 1.2  | 8    | 1868 | Unknown |
|          | 852 Long-tailed Paradise Whydah      | <i>Vidua paradisaea</i>         | Wing   | 65 | 72  | 68.7  | 2    | 482  | 991  | Yes     |
|          |                                      |                                 | Head   | 23 | 24  | 23.6  | 1.1  | 47   | 991  | Unknown |
|          |                                      |                                 | Culmen | 9  | 11  | 9.6   | 0.6  | 76   | 991  | Unknown |
|          |                                      |                                 | Mass   | 12 | 17  | 14.5  | 1.9  | 791  | 991  | No      |
|          |                                      |                                 | Tarsus | 13 | 16  | 14.6  | 0.7  | 28   | 991  | Unknown |
|          | 846 Pin-tailed Whydah                | <i>Vidua macroura</i>           | Culmen | 11 | 14  | 12.2  | 1.2  | 23   | 2074 | Unknown |
|          |                                      |                                 | Tarsus | 16 | 18  | 17    | 0.4  | 18   | 2074 | Unknown |
|          |                                      |                                 | Mass   | 17 | 26  | 21.7  | 2.4  | 1569 | 2074 | Yes     |
|          |                                      |                                 | Wing   | 75 | 83  | 79.5  | 2.3  | 1482 | 2074 | Yes     |
|          |                                      |                                 | Head   | 25 | 27  | 26.2  | 0.7  | 25   | 2074 | Unknown |
|          | 850 Purple Indigobird                | <i>Vidua purpurascens</i>       | Tail   | 53 | 327 | 174.8 | 95.5 | 157  | 2074 | Yes     |
|          |                                      |                                 | Mass   | 13 | 18  | 15.1  | 1.3  | 2802 | 4962 | Yes     |
|          |                                      |                                 | Wing   | 65 | 76  | 70.6  | 3    | 2106 | 4962 | Yes     |
|          |                                      |                                 | Head   | 23 | 25  | 23.8  | 0.7  | 467  | 4962 | Unknown |
|          |                                      |                                 | Culmen | 8  | 12  | 10.2  | 1    | 545  | 4962 | Unknown |
|          |                                      |                                 | Tarsus | 15 | 20  | 17    | 1.1  | 346  | 4962 | Unknown |
|          |                                      |                                 | Tail   | 44 | 245 | 70    | 54.4 | 904  | 4962 | Yes     |
|          |                                      |                                 | Mass   | 11 | 18  | 13.5  | 1.5  | 77   | 162  | No      |
|          |                                      |                                 | Wing   | 65 | 71  | 68.3  | 2    | 42   | 162  | Unknown |
|          |                                      |                                 | Head   | 18 | 24  | 23    | 2.3  | 12   | 162  | Unknown |

|            |               |                              |                               |        |    |     |       |      |       |       |         |
|------------|---------------|------------------------------|-------------------------------|--------|----|-----|-------|------|-------|-------|---------|
| Piciformes | Zosteropidae  | 847 Shaft-tailed Whydah      | <i>Vidua regia</i>            | Culmen | 9  | 11  | 10.4  | 0.7  | 13    | 162   | Unknown |
|            |               |                              |                               | Tarsus | 14 | 17  | 14.8  | 0.9  | 16    | 162   | Unknown |
|            |               |                              |                               | Tail   | 38 | 48  | 41.3  | 2.8  | 27    | 162   | Unknown |
|            |               |                              |                               | Tail   | 38 | 49  | 41.7  | 3.2  | 27    | 162   | Unknown |
|            |               |                              |                               | Mass   | 12 | 18  | 15.2  | 4    | 1104  | 1661  | No      |
|            |               |                              |                               | Wing   | 65 | 76  | 70.9  | 2.6  | 987   | 1661  | Yes     |
|            |               |                              |                               | Head   | 23 | 25  | 24.1  | 0.5  | 146   | 1661  | Unknown |
|            |               |                              |                               | Culmen | 9  | 14  | 12.1  | 1.4  | 145   | 1661  | Unknown |
|            |               |                              |                               | Tarsus | 15 | 19  | 16.3  | 1.8  | 131   | 1661  | Unknown |
|            |               |                              |                               | Tail   | 38 | 260 | 109.7 | 87   | 267   | 1661  | Yes     |
|            |               | 851 Village Indigobird       | <i>Vidua chalybeata</i>       | Mass   | 11 | 17  | 13.5  | 3.8  | 296   | 612   | No      |
|            |               |                              |                               | Wing   | 62 | 71  | 66.5  | 2.7  | 260   | 612   | Yes     |
|            |               |                              |                               | Head   | 22 | 24  | 23.2  | 2.3  | 121   | 612   | Unknown |
|            |               |                              |                               | Culmen | 8  | 14  | 10.5  | 3    | 121   | 612   | Unknown |
|            |               |                              |                               | Tarsus | 13 | 21  | 15.1  | 2.8  | 78    | 612   | Unknown |
|            |               |                              |                               | Tail   | 36 | 47  | 40.3  | 7.2  | 172   | 612   | No      |
|            | Zosteropidae  | 777 African Yellow White-eye | <i>Zosterops senegalensis</i> | Mass   | 8  | 12  | 10.5  | 5.7  | 1416  | 2150  | Yes     |
|            |               |                              |                               | Wing   | 53 | 64  | 58.9  | 5.2  | 322   | 2150  | Unknown |
|            |               |                              |                               | Head   | 26 | 28  | 27    | 1    | 81    | 2150  | Unknown |
|            |               |                              |                               | Culmen | 10 | 15  | 12    | 1.6  | 119   | 2150  | Unknown |
|            |               |                              |                               | Tarsus | 14 | 18  | 16.1  | 1    | 92    | 2150  | Unknown |
|            |               |                              |                               | Tail   | 37 | 46  | 41.2  | 2.2  | 132   | 2150  | Unknown |
|            |               | 1172 Cape White-eye          | <i>Zosterops virens</i>       | Mass   | 10 | 13  | 11.4  | 0.9  | 38929 | 50080 | No      |
|            |               |                              |                               | Wing   | 56 | 64  | 60.1  | 1.9  | 34261 | 50080 | Yes     |
|            |               |                              |                               | Head   | 27 | 30  | 28.6  | 1.1  | 9228  | 50080 | Unknown |
|            |               |                              |                               | Culmen | 10 | 15  | 11.8  | 1.5  | 10714 | 50080 | Unknown |
|            |               |                              |                               | Tarsus | 16 | 20  | 17.9  | 1    | 6880  | 50080 | Unknown |
|            |               |                              |                               | Tail   | 44 | 51  | 47.4  | 1.9  | 17680 | 50080 | Yes     |
|            | Zosteropidae  | 1171 Orange River White-eye  | <i>Zosterops pallidus</i>     | Mass   | 8  | 12  | 10    | 1    | 2183  | 2469  | No      |
|            |               |                              |                               | Wing   | 53 | 64  | 58.5  | 3    | 1966  | 2469  | Yes     |
|            |               |                              |                               | Culmen | 8  | 15  | 11.8  | 1.9  | 680   | 2469  | Unknown |
|            |               |                              |                               | Tarsus | 14 | 22  | 17.8  | 2    | 631   | 2469  | Unknown |
|            |               |                              |                               | Head   | 26 | 29  | 27.6  | 2.6  | 629   | 2469  | Unknown |
|            |               |                              |                               | Tail   | 42 | 51  | 46.8  | 3.5  | 1017  | 2469  | Yes     |
| Piciformes | Indicatoridae | 443 Brown-backed Honeybird   | <i>Prodotiscus regulus</i>    | Mass   | 12 | 22  | 15.2  | 5.9  | 100   | 143   | Unknown |
|            |               |                              |                               | Wing   | 71 | 83  | 78.1  | 3.7  | 84    | 143   | Unknown |
|            |               |                              |                               | Head   | 27 | 30  | 28.2  | 0.8  | 27    | 143   | Unknown |
|            |               |                              |                               | Culmen | 10 | 13  | 11.8  | 1.1  | 27    | 143   | Unknown |
|            |               |                              |                               | Tarsus | 11 | 14  | 12.1  | 0.9  | 20    | 143   | Unknown |
|            |               |                              |                               | Tail   | 49 | 57  | 52.3  | 2.5  | 30    | 143   | Unknown |
|            |               | 440 Greater Honeyguide       | <i>Indicator indicator</i>    | Head   | 31 | 40  | 36.9  | 5.3  | 111   | 574   | Unknown |
|            |               |                              |                               | Culmen | 12 | 18  | 15.5  | 3.5  | 112   | 574   | Unknown |
|            |               |                              |                               | Tarsus | 16 | 23  | 17.5  | 3    | 84    | 574   | Unknown |
|            |               |                              |                               | Tail   | 47 | 86  | 72.4  | 10.7 | 126   | 574   | Yes     |
|            |               |                              |                               | Mass   | 40 | 63  | 51.5  | 5.3  | 274   | 574   | Yes     |

|          |                               |                                |        |     |     |       |      |      |      |         |
|----------|-------------------------------|--------------------------------|--------|-----|-----|-------|------|------|------|---------|
| Lybiidae | 442 Lesser Honeyguide         | <i>Indicator minor</i>         | Wing   | 98  | 117 | 109.1 | 7.4  | 233  | 574  | Yes     |
|          |                               |                                | Mass   | 24  | 35  | 29    | 3.5  | 2652 | 3575 | No      |
|          |                               |                                | Wing   | 82  | 96  | 88.8  | 6.8  | 2153 | 3575 | Yes     |
|          |                               |                                | Head   | 28  | 58  | 31.2  | 6.5  | 642  | 3575 | Unknown |
|          |                               |                                | Culmen | 9   | 28  | 11.9  | 3.3  | 675  | 3575 | Unknown |
|          |                               |                                | Tarsus | 12  | 22  | 15.7  | 4.1  | 475  | 3575 | Unknown |
|          | 441 Scaly-throated Honeyguide | <i>Indicator variegatus</i>    | Tail   | 52  | 71  | 60    | 6.9  | 891  | 3575 | No      |
|          |                               |                                | Mass   | 44  | 60  | 56.3  | 44.6 | 297  | 378  | No      |
|          |                               |                                | Wing   | 100 | 113 | 106.7 | 6.8  | 263  | 378  | Yes     |
|          |                               |                                | Head   | 34  | 43  | 36.7  | 4.2  | 99   | 378  | Unknown |
|          |                               |                                | Culmen | 12  | 38  | 16.8  | 16.3 | 103  | 378  | Unknown |
|          |                               |                                | Tarsus | 16  | 20  | 17.3  | 1.2  | 63   | 378  | Unknown |
|          | 432 Acacia Pied Barbet        | <i>Tricholaema leucomelas</i>  | Tail   | 62  | 86  | 70.5  | 6.3  | 142  | 378  | Unknown |
|          |                               |                                | Wing   | 75  | 86  | 80.6  | 5.4  | 3326 | 5676 | Yes     |
|          |                               |                                | Tarsus | 19  | 27  | 22    | 2.5  | 467  | 5676 | Unknown |
|          |                               |                                | Mass   | 26  | 44  | 34.7  | 6.7  | 4276 | 5676 | No      |
|          |                               |                                | Head   | 35  | 44  | 38.8  | 2.8  | 609  | 5676 | Unknown |
|          |                               |                                | Culmen | 17  | 26  | 20.8  | 3.1  | 665  | 5676 | Unknown |
|          | 431 Black-collared Barbet     | <i>Lybius torquatus</i>        | Tail   | 42  | 60  | 50.3  | 4.8  | 1045 | 5676 | Yes     |
|          |                               |                                | Mass   | 48  | 68  | 57.6  | 5.2  | 4051 | 4934 | No      |
|          |                               |                                | Wing   | 85  | 98  | 91.9  | 4.2  | 3272 | 4934 | No      |
|          |                               |                                | Head   | 42  | 59  | 46.7  | 4.5  | 920  | 4934 | Unknown |
|          |                               |                                | Culmen | 21  | 29  | 25    | 3.8  | 996  | 4934 | Unknown |
|          |                               |                                | Tarsus | 22  | 46  | 24.9  | 5.8  | 651  | 4934 | Unknown |
|          | 439 Crested Barbet            | <i>Trachyphonus vaillantii</i> | Tail   | 51  | 75  | 61.8  | 7.5  | 1289 | 4934 | No      |
|          |                               |                                | Head   | 44  | 86  | 51.3  | 8.1  | 1454 | 6485 | Unknown |
|          |                               |                                | Culmen | 21  | 31  | 25.9  | 5.6  | 1466 | 6485 | Unknown |
|          |                               |                                | Tarsus | 24  | 41  | 29.5  | 9.6  | 1103 | 6485 | Unknown |
|          |                               |                                | Mass   | 57  | 87  | 72.1  | 7.9  | 5093 | 6485 | Yes     |
|          |                               |                                | Wing   | 93  | 111 | 102.3 | 5.2  | 3971 | 6485 | Yes     |
|          | 436 Red-fronted Tinkerbird    | <i>Pogoniulus pusillus</i>     | Tail   | 66  | 106 | 90.5  | 10.6 | 1885 | 6485 | No      |
|          |                               |                                | Mass   | 13  | 18  | 15.4  | 3.9  | 291  | 352  | Unknown |
|          |                               |                                | Wing   | 56  | 64  | 60.2  | 4.6  | 273  | 352  | Unknown |
|          |                               |                                | Head   | 29  | 36  | 31.3  | 2.8  | 69   | 352  | Unknown |
|          |                               |                                | Culmen | 11  | 18  | 14    | 3.2  | 89   | 352  | Unknown |
|          |                               |                                | Tarsus | 15  | 26  | 17    | 2.8  | 54   | 352  | Unknown |
|          | 433 White-eared Barbet        | <i>Stactolaema leucotis</i>    | Tail   | 31  | 42  | 36.2  | 3    | 99   | 352  | Unknown |
|          |                               |                                | Mass   | 44  | 60  | 50.9  | 4    | 137  | 174  | Unknown |
|          |                               |                                | Head   | 41  | 45  | 43.2  | 1.1  | 67   | 174  | Unknown |
|          |                               |                                | Culmen | 17  | 22  | 19.5  | 1.2  | 74   | 174  | Unknown |
|          |                               |                                | Tarsus | 21  | 25  | 22.5  | 1    | 23   | 174  | Unknown |
|          |                               |                                | Tail   | 52  | 65  | 56.8  | 3.6  | 78   | 174  | Unknown |
|          | 434 Whyte's Barbet            | <i>Stactolaema whytii</i>      | Wing   | 88  | 94  | 91.3  | 1.9  | 105  | 174  | Unknown |
|          |                               |                                | Mass   | 51  | 58  | 55.1  | 2.7  | 8    | 28   | Unknown |
|          | 437 Yellow-fronted Tinkerbird | <i>Pogoniulus chrysoconus</i>  | Head   | 13  | 36  | 29.5  | 4    | 129  | 900  | Unknown |

|         |                              |                                   |        |     |     |       |      |      |      |         |
|---------|------------------------------|-----------------------------------|--------|-----|-----|-------|------|------|------|---------|
| Picidae | 438 Yellow-rumped Tinkerbird | <i>Pogoniulus bilineatus</i>      | Culmen | 11  | 25  | 14    | 3.7  | 158  | 900  | Unknown |
|         |                              |                                   | Tarsus | 14  | 23  | 15.9  | 2.4  | 119  | 900  | Unknown |
|         |                              |                                   | Tail   | 16  | 45  | 35.2  | 5.9  | 180  | 900  | Unknown |
|         |                              |                                   | Mass   | 11  | 17  | 14.2  | 3.9  | 578  | 900  | No      |
|         |                              |                                   | Wing   | 58  | 67  | 62.4  | 3.6  | 407  | 900  | Unknown |
|         |                              |                                   | Mass   | 13  | 18  | 15.5  | 4.2  | 1100 | 1498 | Unknown |
|         |                              |                                   | Wing   | 52  | 60  | 56.5  | 4.9  | 959  | 1498 | Unknown |
|         |                              |                                   | Head   | 29  | 34  | 31.4  | 1.5  | 488  | 1498 | Unknown |
|         |                              |                                   | Culmen | 11  | 17  | 14    | 2.3  | 575  | 1498 | Unknown |
|         |                              |                                   | Tarsus | 15  | 20  | 17.1  | 1.7  | 262  | 1498 | Unknown |
|         | 451 Bearded Woodpecker       | <i>Chloropicus namaquus</i>       | Tail   | 30  | 40  | 33.7  | 2.6  | 635  | 1498 | Unknown |
|         |                              |                                   | Mass   | 66  | 112 | 82.1  | 11.1 | 71   | 88   | Yes     |
|         |                              |                                   | Wing   | 92  | 137 | 129.2 | 10.6 | 63   | 88   | Yes     |
|         |                              |                                   | Head   | 57  | 67  | 61.9  | 3.1  | 22   | 88   | Unknown |
|         |                              |                                   | Culmen | 27  | 41  | 33.7  | 3.5  | 24   | 88   | Unknown |
|         |                              |                                   | Tarsus | 21  | 27  | 22.5  | 1.9  | 16   | 88   | Unknown |
|         | 446 Bennett's Woodpecker     | <i>Campethera bennettii</i>       | Tail   | 58  | 79  | 70    | 6    | 26   | 88   | No      |
|         |                              |                                   | Mass   | 62  | 94  | 80.5  | 8.7  | 87   | 117  | No      |
|         |                              |                                   | Wing   | 117 | 130 | 124.7 | 3.4  | 69   | 117  | No      |
|         |                              |                                   | Head   | 54  | 59  | 56.6  | 1.5  | 27   | 117  | Unknown |
|         |                              |                                   | Culmen | 25  | 32  | 28.6  | 2    | 30   | 117  | Unknown |
|         |                              |                                   | Tarsus | 21  | 27  | 23.5  | 1.8  | 22   | 117  | Unknown |
|         | 450 Cardinal Woodpecker      | <i>Dendropicos fuscescens</i>     | Tail   | 63  | 85  | 74    | 6.3  | 37   | 117  | No      |
|         |                              |                                   | Mass   | 27  | 37  | 32    | 2.5  | 610  | 893  | No      |
|         |                              |                                   | Wing   | 89  | 100 | 94.7  | 3    | 516  | 893  | Yes     |
|         |                              |                                   | Head   | 38  | 44  | 40.8  | 1.6  | 152  | 893  | Unknown |
|         |                              |                                   | Culmen | 16  | 22  | 19    | 1.8  | 168  | 893  | Unknown |
|         |                              |                                   | Tarsus | 15  | 20  | 16.7  | 1.7  | 104  | 893  | Unknown |
|         | 447 Golden-tailed Woodpecker | <i>Campethera abingoni</i>        | Tail   | 45  | 62  | 52.4  | 4.6  | 202  | 893  | No      |
|         |                              |                                   | Mass   | 53  | 78  | 66.6  | 7    | 432  | 523  | Yes     |
|         |                              |                                   | Wing   | 96  | 123 | 113.5 | 8    | 365  | 523  | No      |
|         |                              |                                   | Head   | 48  | 59  | 54.1  | 3.7  | 123  | 523  | Unknown |
|         |                              |                                   | Culmen | 21  | 31  | 27.4  | 6.3  | 139  | 523  | Unknown |
|         |                              |                                   | Tarsus | 19  | 24  | 21.1  | 1.3  | 80   | 523  | Unknown |
|         | 445 Ground Woodpecker        | <i>Geocolaptes olivaceus</i>      | Tail   | 58  | 85  | 69.4  | 8.6  | 151  | 523  | No      |
|         |                              |                                   | Mass   | 91  | 130 | 112.3 | 13.4 | 58   | 69   | No      |
|         | 448 Knysna Woodpecker        | <i>Campethera notata</i>          | Wing   | 122 | 134 | 128.3 | 3.7  | 21   | 69   | Unknown |
|         |                              |                                   | Mass   | 55  | 72  | 63.7  | 4.6  | 67   | 75   | Yes     |
|         |                              |                                   | Wing   | 101 | 111 | 106.2 | 2.9  | 61   | 75   | No      |
|         |                              |                                   | Head   | 50  | 55  | 52.4  | 1.7  | 10   | 75   | Unknown |
|         |                              |                                   | Culmen | 21  | 27  | 23.5  | 1.8  | 21   | 75   | Unknown |
|         |                              |                                   | Tarsus | 21  | 23  | 21.8  | 0.8  | 6    | 75   | Unknown |
|         | 452 Olive Woodpecker         | <i>Dendropicos griseocephalus</i> | Tail   | 74  | 84  | 77.1  | 3    | 21   | 75   | Unknown |
|         |                              |                                   | Mass   | 36  | 60  | 49.3  | 5.6  | 131  | 175  | Yes     |
|         |                              |                                   | Wing   | 103 | 114 | 108.8 | 3    | 112  | 175  | Yes     |

|                   |               |     |                      |                              |        |     |     |       |      |     |      |         |
|-------------------|---------------|-----|----------------------|------------------------------|--------|-----|-----|-------|------|-----|------|---------|
| Procellariiformes | Diomedelidae  | 453 | Red-throated Wryneck | <i>Jynx ruficollis</i>       | Head   | 48  | 54  | 50.8  | 2.2  | 37  | 175  | Unknown |
|                   |               |     |                      |                              | Culmen | 23  | 30  | 26.5  | 2.5  | 43  | 175  | Unknown |
|                   |               |     |                      |                              | Tarsus | 17  | 23  | 19.7  | 1.4  | 28  | 175  | Unknown |
|                   |               |     |                      |                              | Tail   | 66  | 80  | 72.1  | 3.5  | 48  | 175  | Yes     |
|                   |               |     |                      |                              | Mass   | 42  | 58  | 50.7  | 4.4  | 273 | 379  | Unknown |
|                   |               |     |                      |                              | Wing   | 80  | 97  | 91.1  | 5.3  | 209 | 379  | Unknown |
|                   |               |     |                      |                              | Head   | 34  | 48  | 43.4  | 5    | 69  | 379  | Unknown |
|                   |               |     |                      |                              | Culmen | 15  | 23  | 18.5  | 3.8  | 72  | 379  | Unknown |
|                   |               |     |                      |                              | Tarsus | 19  | 26  | 21.9  | 3.6  | 46  | 379  | Unknown |
|                   |               |     |                      |                              | Tail   | 60  | 81  | 71.1  | 7    | 92  | 379  | Unknown |
|                   |               |     |                      |                              | Culmen | 164 | 176 | 170.8 | 3.9  | 18  | 1010 | Unknown |
|                   |               |     |                      |                              | Mass   | 103 | 129 | 116.9 | 7.6  | 25  | 50   | Unknown |
|                   |               |     |                      |                              | Wing   | 141 | 160 | 149.3 | 5.2  | 19  | 50   | Unknown |
|                   |               |     |                      |                              | Head   | 42  | 48  | 45.8  | 2.4  | 5   | 50   | Unknown |
|                   |               |     |                      |                              | Culmen | 20  | 22  | 20.8  | 0.8  | 5   | 50   | Unknown |
| Psittaciformes    | Psittacidae   | 327 | Meyer's Parrot       | <i>Poicephalus meyeri</i>    | Tail   | 67  | 71  | 69.7  | 1.4  | 9   | 50   | Unknown |
|                   |               |     |                      |                              | Mass   | 45  | 63  | 53.5  | 6.2  | 369 | 609  | Unknown |
|                   |               |     |                      |                              | Wing   | 93  | 111 | 103.4 | 7.9  | 323 | 609  | Unknown |
|                   |               |     |                      |                              | Head   | 31  | 39  | 34    | 3    | 78  | 609  | Unknown |
|                   |               |     |                      |                              | Culmen | 16  | 23  | 19.4  | 1.9  | 73  | 609  | Unknown |
|                   |               |     |                      |                              | Tarsus | 13  | 17  | 14.8  | 0.9  | 29  | 609  | Unknown |
|                   |               |     |                      |                              | Tail   | 45  | 57  | 50.6  | 3    | 116 | 609  | Unknown |
|                   |               |     |                      |                              | Mass   | 95  | 132 | 113.2 | 10.9 | 62  | 84   | No      |
|                   |               |     |                      |                              | Wing   | 142 | 153 | 146.7 | 3.7  | 35  | 84   | No      |
|                   |               |     |                      |                              | Head   | 47  | 48  | 47.2  | 0.6  | 5   | 84   | Unknown |
|                   |               |     |                      |                              | Culmen | 22  | 28  | 24.1  | 2.6  | 5   | 84   | Unknown |
|                   |               |     |                      |                              | Tarsus | 17  | 18  | 17.1  | 0.8  | 4   | 84   | Unknown |
|                   |               |     |                      |                              | Tail   | 71  | 75  | 72.8  | 1.7  | 4   | 84   | Unknown |
|                   |               |     |                      |                              | Head   | 37  | 44  | 41.8  | 2.4  | 11  | 266  | Unknown |
|                   |               |     |                      |                              | Culmen | 9   | 19  | 13    | 3.9  | 10  | 266  | Unknown |
| Strigiformes      | Caprimulgidae | 371 | European Nightjar    | <i>Caprimulgus europaeus</i> | Tarsus | 18  | 20  | 18.5  | 0.7  | 7   | 266  | Unknown |
|                   |               |     |                      |                              | Tail   | 112 | 143 | 131.6 | 9.1  | 18  | 266  | Unknown |
|                   |               |     |                      |                              | Mass   | 46  | 83  | 68    | 9    | 141 | 266  | No      |
|                   |               |     |                      |                              | Wing   | 160 | 202 | 188.3 | 10   | 86  | 266  | No      |
|                   |               |     |                      |                              | Mass   | 42  | 69  | 55.8  | 11.9 | 455 | 617  | Yes     |
|                   |               |     |                      |                              | Wing   | 82  | 177 | 161.4 | 19.5 | 298 | 617  | Yes     |
|                   |               |     |                      |                              | Head   | 40  | 47  | 44.2  | 4.1  | 122 | 617  | Unknown |
|                   |               |     |                      |                              | Culmen | 10  | 28  | 17.7  | 13.9 | 110 | 617  | Unknown |
|                   |               |     |                      |                              | Tarsus | 17  | 21  | 19.1  | 1.4  | 83  | 617  | Unknown |
|                   |               |     |                      |                              | Tail   | 104 | 135 | 121.5 | 16.4 | 156 | 617  | No      |
|                   |               |     |                      |                              | Mass   | 49  | 91  | 70.3  | 10.9 | 77  | 100  | No      |
|                   |               |     |                      |                              | Wing   | 124 | 197 | 177.6 | 25.5 | 59  | 100  | No      |
|                   |               |     |                      |                              | Head   | 42  | 50  | 46.1  | 2.2  | 25  | 100  | Unknown |
|                   |               |     |                      |                              | Culmen | 11  | 27  | 16.3  | 4.7  | 29  | 100  | Unknown |
|                   |               |     |                      |                              | Tarsus | 16  | 24  | 20.4  | 1.9  | 24  | 100  | Unknown |
|                   |               |     |                      |                              | Head   | 42  | 50  | 46.1  | 2.2  | 25  | 100  | Unknown |

|           |                             |                                |        |     |      |        |       |     |     |         |
|-----------|-----------------------------|--------------------------------|--------|-----|------|--------|-------|-----|-----|---------|
| Strigidae | 377 Pennant-winged Nightjar | <i>Caprimulgus vexillarius</i> | Tail   | 117 | 140  | 129.3  | 7.2   | 29  | 100 | Unknown |
|           |                             |                                | Mass   | 72  | 95   | 84.7   | 6.9   | 21  | 53  | Unknown |
|           |                             |                                | Wing   | 196 | 223  | 212.7  | 15.4  | 3   | 53  | Unknown |
|           | 372 Rufous-cheeked Nightjar | <i>Caprimulgus rufigena</i>    | Head   | 38  | 46   | 41.3   | 5.3   | 112 | 943 | Unknown |
|           |                             |                                | Culmen | 9   | 23   | 15.5   | 4.9   | 91  | 943 | Unknown |
|           |                             |                                | Tarsus | 16  | 22   | 18.9   | 1.6   | 69  | 943 | Unknown |
|           |                             |                                | Tail   | 110 | 135  | 121.9  | 11.5  | 159 | 943 | Yes     |
|           |                             |                                | Mass   | 45  | 160  | 61.6   | 21.7  | 661 | 943 | No      |
|           | 376 Square-tailed Nightjar  | <i>Caprimulgus fossii</i>      | Wing   | 58  | 173  | 157.1  | 23.9  | 560 | 943 | No      |
|           |                             |                                | Head   | 39  | 43   | 41     | 1.2   | 30  | 656 | Unknown |
|           |                             |                                | Culmen | 10  | 21   | 15.9   | 4     | 30  | 656 | Unknown |
|           |                             |                                | Tarsus | 19  | 22   | 20.2   | 1.1   | 26  | 656 | Unknown |
|           |                             |                                | Tail   | 112 | 136  | 124    | 8     | 40  | 656 | Yes     |
|           |                             |                                | Mass   | 47  | 157  | 62.5   | 19.8  | 317 | 656 | No      |
|           |                             |                                | Wing   | 56  | 171  | 155.3  | 25.1  | 177 | 656 | No      |
|           | 375 Swamp Nightjar          | <i>Caprimulgus natalensis</i>  | Mass   | 57  | 83   | 72.2   | 7.8   | 29  | 45  | Yes     |
|           |                             |                                | Wing   | 151 | 166  | 158.4  | 3.9   | 27  | 45  | Unknown |
|           |                             |                                | Head   | 42  | 44   | 43.2   | 1     | 9   | 45  | Unknown |
|           |                             |                                | Culmen | 12  | 23   | 14.6   | 3.8   | 9   | 45  | Unknown |
|           |                             |                                | Tarsus | 20  | 23   | 21.6   | 0.8   | 9   | 45  | Unknown |
|           |                             |                                | Tail   | 100 | 113  | 105.4  | 4.1   | 10  | 45  | Unknown |
|           |                             |                                | Mass   | 74  | 135  | 110.4  | 16.1  | 47  | 89  | Unknown |
|           | 366 African Barred Owlet    | <i>Glaucidium capense</i>      | Wing   | 118 | 141  | 134.9  | 6.1   | 34  | 89  | Unknown |
|           |                             |                                | Head   | 42  | 47   | 44.9   | 1.6   | 9   | 89  | Unknown |
|           |                             |                                | Culmen | 13  | 21   | 18.2   | 3.2   | 9   | 89  | Unknown |
|           |                             |                                | Tarsus | 22  | 28   | 24.2   | 2.5   | 6   | 89  | Unknown |
|           |                             |                                | Tail   | 75  | 86   | 81.1   | 3.9   | 13  | 89  | Unknown |
|           |                             |                                | Wing   | 126 | 143  | 134.2  | 4.3   | 136 | 263 | Unknown |
|           |                             |                                | Culmen | 11  | 18   | 15.1   | 2.2   | 13  | 263 | Unknown |
|           | 363 African Scops Owl       | <i>Otus senegalensis</i>       | Tarsus | 20  | 28   | 24.4   | 2.3   | 11  | 263 | Unknown |
|           |                             |                                | Mass   | 54  | 95   | 67.1   | 9.4   | 198 | 263 | Unknown |
|           |                             |                                | Head   | 38  | 42   | 40.6   | 1.4   | 17  | 263 | Unknown |
|           |                             |                                | Tail   | 56  | 68   | 62.6   | 3.9   | 26  | 263 | Unknown |
|           |                             |                                | Mass   | 260 | 615  | 342.7  | 83.9  | 60  | 205 | Unknown |
|           |                             |                                | Culmen | 20  | 33   | 29.1   | 3.1   | 32  | 205 | Unknown |
|           |                             |                                | Tarsus | 7   | 55   | 43.4   | 10.6  | 31  | 205 | Unknown |
|           | 362 African Wood Owl        | <i>Strix woodfordii</i>        | Tail   | 134 | 166  | 148.9  | 10.4  | 37  | 205 | Unknown |
|           |                             |                                | Wing   | 229 | 277  | 252.4  | 12.7  | 59  | 205 | Unknown |
|           |                             |                                | Head   | 62  | 69   | 66.1   | 2     | 25  | 205 | Unknown |
|           |                             |                                | Mass   | 779 | 1413 | 1106.7 | 236.9 | 11  | 79  | Unknown |
|           |                             |                                | Wing   | 344 | 387  | 369.7  | 15.6  | 10  | 79  | Unknown |
|           |                             |                                | Head   | 96  | 96   | 95.8   | NA    | 1   | 79  | Unknown |
|           |                             |                                | Culmen | 38  | 44   | 42     | 3.1   | 4   | 79  | Unknown |
|           | 367 Cape Eagle-Owl          | <i>Bubo capensis</i>           | Tarsus | 15  | 94   | 65.8   | 37.9  | 4   | 79  | Unknown |
|           |                             |                                | Tail   | 179 | 206  | 196.4  | 11.4  | 5   | 79  | Unknown |

|               |            |                              |                            |        |      |      |        |       |     |      |         |
|---------------|------------|------------------------------|----------------------------|--------|------|------|--------|-------|-----|------|---------|
|               |            | 361 Marsh Owl                | <i>Asio capensis</i>       | Mass   | 240  | 377  | 321.1  | 33.7  | 124 | 307  | Unknown |
|               |            |                              |                            | Wing   | 260  | 314  | 290.6  | 15.6  | 91  | 307  | Unknown |
|               |            |                              |                            | Head   | 59   | 66   | 62.3   | 2.1   | 49  | 307  | Unknown |
|               |            |                              |                            | Culmen | 15   | 31   | 20.8   | 7.4   | 55  | 307  | Unknown |
|               |            |                              |                            | Tarsus | 47   | 61   | 55.2   | 3.7   | 46  | 307  | Unknown |
|               |            |                              |                            | Tail   | 123  | 160  | 145.7  | 12.7  | 62  | 307  | Unknown |
|               |            | 365 Pearl-spotted Owlet      | <i>Glaucidium perlatum</i> | Mass   | 64   | 100  | 80.7   | 9     | 722 | 962  | No      |
|               |            |                              |                            | Wing   | 95   | 115  | 105.8  | 7.2   | 586 | 962  | No      |
|               |            |                              |                            | Head   | 36   | 65   | 40.5   | 7.1   | 127 | 962  | Unknown |
|               |            |                              |                            | Culmen | 11   | 36   | 16.3   | 8.5   | 133 | 962  | Unknown |
|               |            |                              |                            | Tarsus | 19   | 40   | 25.5   | 7.9   | 86  | 962  | Unknown |
|               |            |                              |                            | Tail   | 25   | 81   | 71     | 12.1  | 189 | 962  | Unknown |
|               |            | 364 Southern White-faced Owl | <i>Ptilopsis granti</i>    | Head   | 56   | 59   | 57.3   | 1.3   | 10  | 263  | Unknown |
|               |            |                              |                            | Culmen | 14   | 36   | 23.1   | 7.6   | 20  | 263  | Unknown |
|               |            |                              |                            | Tarsus | 33   | 47   | 40.1   | 4.4   | 10  | 263  | Unknown |
|               |            |                              |                            | Tail   | 81   | 108  | 95     | 7.8   | 25  | 263  | Unknown |
|               |            |                              |                            | Mass   | 170  | 253  | 210.3  | 22.8  | 67  | 263  | Unknown |
|               |            |                              |                            | Wing   | 179  | 215  | 198.5  | 8.7   | 47  | 263  | Unknown |
|               |            | 368 Spotted Eagle-Owl        | <i>Bubo africanus</i>      | Head   | 72   | 87   | 79.7   | 6.9   | 325 | 3163 | Unknown |
|               |            |                              |                            | Culmen | 20   | 45   | 29     | 9.5   | 375 | 3163 | Unknown |
|               |            |                              |                            | Tarsus | 9    | 84   | 71.1   | 13.1  | 319 | 3163 | Unknown |
|               |            |                              |                            | Tail   | 89   | 202  | 177.1  | 26    | 408 | 3163 | No      |
|               |            |                              |                            | Mass   | 466  | 905  | 700.5  | 122.3 | 944 | 3163 | Yes     |
|               |            |                              |                            | Wing   | 190  | 364  | 323.2  | 43.6  | 685 | 3163 | No      |
|               |            | 369 Verreaux's Eagle-Owl     | <i>Bubo lacteus</i>        | Mass   | 1162 | 2464 | 1911.2 | 376.9 | 30  | 142  | Unknown |
|               |            |                              |                            | Wing   | 443  | 463  | 452.1  | 7.2   | 9   | 142  | Unknown |
|               |            |                              |                            | Head   | 101  | 104  | 102.7  | 2.5   | 2   | 142  | Unknown |
|               |            |                              |                            | Culmen | 37   | 49   | 42.6   | 9.1   | 2   | 142  | Unknown |
|               |            |                              |                            | Tarsus | 74   | 86   | 81     | 6.6   | 3   | 142  | Unknown |
|               |            |                              |                            | Tail   | 228  | 230  | 229    | 1.4   | 2   | 142  | Unknown |
|               | Tytonidae  | 360 African Grass Owl        | <i>Tyto capensis</i>       | Mass   | 367  | 562  | 461.4  | 62.3  | 14  | 138  | Unknown |
|               |            |                              |                            | Wing   | 313  | 342  | 330    | 10.1  | 10  | 138  | Unknown |
|               |            |                              |                            | Head   | 77   | 80   | 78.2   | 1.3   | 4   | 138  | Unknown |
|               |            |                              |                            | Culmen | 21   | 35   | 26.6   | 6.2   | 6   | 138  | Unknown |
|               |            |                              |                            | Tarsus | 7    | 78   | 49.7   | 38.8  | 5   | 138  | Unknown |
|               |            |                              |                            | Tail   | 125  | 142  | 129.2  | 7.5   | 6   | 138  | Unknown |
|               |            | 359 Barn Owl (pre-split)     | <i>Tyto alba</i>           | Mass   | 276  | 442  | 342.4  | 39.3  | 535 | 3075 | No      |
|               |            |                              |                            | Wing   | 261  | 312  | 293.3  | 12.7  | 456 | 3075 | No      |
|               |            |                              |                            | Head   | 67   | 74   | 70.5   | 2     | 279 | 3075 | Unknown |
|               |            |                              |                            | Culmen | 18   | 35   | 22.5   | 5.3   | 305 | 3075 | Unknown |
|               |            |                              |                            | Tarsus | 62   | 78   | 69.9   | 3.8   | 270 | 3075 | Unknown |
|               |            |                              |                            | Tail   | 109  | 136  | 121.9  | 7     | 315 | 3075 | Unknown |
| Trogoniformes | Trogonidae | 393 Narina Trogon            | <i>Apaloderma narina</i>   | Mass   | 55   | 79   | 67.2   | 7.9   | 90  | 137  | No      |
|               |            |                              |                            | Wing   | 122  | 138  | 130.3  | 7.8   | 83  | 137  | No      |
|               |            |                              |                            | Head   | 43   | 46   | 44.3   | 0.9   | 36  | 137  | Unknown |



|               |                 |                         |                                 |        |     |     |       |      |      |      |         |
|---------------|-----------------|-------------------------|---------------------------------|--------|-----|-----|-------|------|------|------|---------|
| Turniciformes | Turnicidae      | 196 Common Buttonquail  | <i>Turnix sylvaticus</i>        | Culmen | 16  | 22  | 19.2  | 1.8  | 33   | 137  | Unknown |
|               |                 |                         |                                 | Tail   | 160 | 183 | 170.8 | 6.5  | 44   | 137  | No      |
|               |                 |                         |                                 | Tarsus | 17  | 20  | 18    | 1.1  | 22   | 137  | Unknown |
|               |                 |                         |                                 | Mass   | 27  | 65  | 44.5  | 9.8  | 213  | 319  | Yes     |
|               |                 |                         |                                 | Wing   | 70  | 88  | 78    | 6.9  | 159  | 319  | No      |
|               |                 |                         |                                 | Head   | 30  | 35  | 32.4  | 1.9  | 61   | 319  | Unknown |
|               |                 |                         |                                 | Culmen | 11  | 20  | 13.9  | 2.9  | 64   | 319  | Unknown |
|               |                 |                         |                                 | Tarsus | 19  | 24  | 21.5  | 1.2  | 53   | 319  | Unknown |
|               |                 |                         |                                 | Tail   | 25  | 42  | 35.8  | 4.5  | 66   | 319  | No      |
|               |                 |                         |                                 | Mass   | 60  | 97  | 76.5  | 9.6  | 1059 | 1423 | Yes     |
| Upupiformes   | Phoeniculidae   | 419 Green Wood Hoopoe   | <i>Phoeniculus purpureus</i>    | Wing   | 127 | 158 | 140.5 | 8.8  | 1024 | 1423 | Yes     |
|               |                 |                         |                                 | Head   | 62  | 88  | 74.6  | 16.4 | 228  | 1423 | Unknown |
|               |                 |                         |                                 | Culmen | 36  | 64  | 49.8  | 8.1  | 226  | 1423 | Unknown |
|               |                 |                         |                                 | Tarsus | 20  | 163 | 30.6  | 34.7 | 175  | 1423 | Unknown |
|               |                 |                         |                                 | Tail   | 129 | 250 | 212.1 | 32.1 | 259  | 1423 | No      |
|               |                 |                         |                                 | Mass   | 72  | 96  | 85.2  | 9.3  | 10   | 37   | Unknown |
|               | Rhinopomastidae | 420 Violet Wood Hoopoe  | <i>Phoeniculus damarensis</i>   | Tarsus | 20  | 23  | 21.2  | 1    | 30   | 294  | Unknown |
|               |                 | 421 Common Scimitarbill | <i>Rhinopomastus cyanomelas</i> | Mass   | 24  | 48  | 34.2  | 8.5  | 154  | 294  | No      |
|               |                 |                         |                                 | Wing   | 93  | 116 | 107.4 | 6.5  | 129  | 294  | Yes     |
|               |                 |                         |                                 | Head   | 38  | 109 | 62.1  | 15   | 45   | 294  | Unknown |
|               |                 |                         |                                 | Culmen | 19  | 52  | 42.5  | 8.6  | 47   | 294  | Unknown |
|               |                 |                         |                                 | Tail   | 72  | 157 | 126.8 | 21.1 | 50   | 294  | Unknown |
|               | Upupidae        | 418 African Hoopoe      | <i>Upupa africana</i>           | Head   | 56  | 83  | 72.5  | 7.4  | 203  | 1194 | Unknown |
|               |                 |                         |                                 | Culmen | 33  | 59  | 48.5  | 6.8  | 220  | 1194 | Unknown |
|               |                 |                         |                                 | Tarsus | 18  | 95  | 26.2  | 18.3 | 165  | 1194 | Unknown |
|               |                 |                         |                                 | Tail   | 66  | 104 | 91.7  | 10.1 | 249  | 1194 | Yes     |
|               |                 |                         |                                 | Mass   | 42  | 72  | 57.7  | 10.1 | 798  | 1194 | Yes     |
|               |                 |                         |                                 | Wing   | 112 | 148 | 135.5 | 11.6 | 582  | 1194 | Yes     |

---
