# Supplementary material
Source: publisher figshare collection journal article supplement (https://tandf.figshare.com/articles/dataset/_/11363777)
Supplement: Supplementary file 3 [file 2]

# Supplementary Table S3

DOI: 10.2989/00306525.2019.1645054

Ostrich: Journal of African Ornithology 2020, 91(2)

Special Issue: Citizen Science

## Summarising biometrics from the SAFRING database for southern African birds

Rose, Thomson, Oschadleus and Lee

**Table S3:** Summary of sex-specific biometrics for bird species in the SAFRING database, extracted between July and November 2018, showing mean values of measures of: mass (g), tail length (mm) and wing length (mm). ADU number = number assigned by the Animal Demography Unit at the University of Cape Town, South Africa. Sex 1 = male; 2 = female. However, the codes for sex entered by the bird ringers could not be cross-validated, thus not all significant differences are biologically significant, but should be further evaluated at the species level.

| ADU number | IOC_English            | Biometric | Males  |        |      | Females |        |      | p-value |
|------------|------------------------|-----------|--------|--------|------|---------|--------|------|---------|
|            |                        |           | Mean   | SD     | N    | Mean    | SD     | N    |         |
| 9          | Grey-headed Albatross  | Mass      | 3535.8 | 235.7  | 12   | 3097.3  | 173.7  | 11   | <0.001  |
| 44         | Cape Gannet            | Mass      | 2722.0 | 218.3  | 25   | 2729.0  | 180.4  | 25   | 0.444   |
| 67         | Little Bittern         | Mass      | 121.3  | 17.1   | 89   | 114.7   | 13.6   | 56   | 0.353   |
|            |                        | Tail      | 49.0   | 3.4    | 34   | 48.1    | 3.6    | 24   | 0.327   |
|            |                        | Wing      | 141.5  | 6.5    | 76   | 139.2   | 7.2    | 51   | 0.045   |
| 89         | Egyptian Goose         | Mass      | 1601.6 | 1085.5 | 98   | 1629.7  | 792.0  | 60   | 0.202   |
|            |                        | Wing      | 386.4  | 44.1   | 26   | 369.3   | 45.6   | 13   | 0.242   |
| 90         | South African Shelduck | Mass      | 1447.2 | 211.6  | 493  | 1177.0  | 194.6  | 429  | <0.001  |
|            |                        | Tail      | 123.9  | 17.7   | 17   | 120.9   | 16.3   | 16   | 0.085   |
|            |                        | Wing      | 328.8  | 36.1   | 57   | 301.3   | 34.2   | 44   | <0.001  |
| 94         | Cape Shoveler          | Mass      | 602.8  | 76.7   | 90   | 545.0   | 63.4   | 80   | <0.001  |
| 95         | African Black Duck     | Mass      | 1044.5 | 179.5  | 46   | 912.9   | 93.4   | 32   | 0.003   |
| 96         | Yellow-billed Duck     | Mass      | 976.4  | 92.6   | 5043 | 845.2   | 88.3   | 3701 | <0.001  |
|            |                        | Wing      | 262.4  | 10.3   | 55   | 251.4   | 9.3    | 17   | <0.001  |
| 97         | Red-billed Teal        | Mass      | 725.5  | 217.7  | 30   | 616.7   | 157.8  | 25   | 0.030   |
|            |                        | Wing      | 224.9  | 8.4    | 14   | 213.8   | 11.9   | 13   | 0.010   |
| 98         | Cape Teal              | Mass      | 413.1  | 165.5  | 35   | 379.7   | 176.6  | 44   | 0.011   |
| 99         | Hottentot Teal         | Mass      | 272.4  | 22.1   | 251  | 267.3   | 23.9   | 137  | 0.294   |
|            |                        | Wing      | 154.7  | 4.1    | 252  | 153.0   | 4.3    | 134  | <0.001  |
| 102        | Southern Pochard       | Mass      | 790.7  | 79.9   | 146  | 761.4   | 78.4   | 125  | 0.001   |
| 106        | Cape Vulture           | Mass      | 7606.7 | 2633.7 | 37   | 6869.6  | 3242.5 | 35   | 0.346   |
|            |                        | Wing      | 719.2  | 73.6   | 38   | 913.6   | 1205.5 | 29   | 0.890   |
| 107        | White-backed Vulture   | Mass      | 4273.1 | 2290.0 | 43   | 5044.5  | 1514.3 | 43   | 0.710   |
|            |                        | Wing      | 669.2  | 142.2  | 34   | 651.8   | 104.2  | 31   | 0.315   |
| 113        | Peregrine Falcon       | Mass      | 501.8  | 66.6   | 34   | 735.7   | 60.0   | 50   | <0.001  |
| 114        | Lanner Falcon          | Mass      | 527.8  | 55.4   | 66   | 667.4   | 101.6  | 109  | <0.001  |
|            |                        | Tail      | 169.4  | 39.5   | 26   | 169.8   | 49.0   | 23   | 0.973   |
|            |                        | Wing      | 318.7  | 51.5   | 40   | 351.4   | 75.2   | 43   | 0.025   |
| 119        | Amur Falcon            | Mass      | 138.0  | 14.4   | 174  | 146.6   | 18.0   | 169  | <0.001  |
|            |                        | Tail      | 127.0  | 6.3    | 149  | 128.1   | 6.9    | 141  | 0.124   |
|            |                        | Wing      | 232.2  | 7.9    | 174  | 235.1   | 7.3    | 167  | <0.001  |
| 122        | Greater Kestrel        | Mass      | 247.4  | 19.1   | 88   | 271.3   | 43.5   | 94   | <0.001  |
|            |                        | Tail      | 153.8  | 9.3    | 22   | 164.2   | 7.2    | 16   | <0.001  |
|            |                        | Wing      | 273.3  | 22.5   | 48   | 290.4   | 8.9    | 48   | <0.001  |
| 123        | Rock Kestrel           | Mass      | 190.2  | 22.5   | 215  | 203.5   | 25.8   | 282  | 0.665   |
|            |                        | Tail      | 147.9  | 19.5   | 72   | 151.6   | 19.7   | 102  | 0.119   |
|            |                        | Wing      | 236.4  | 26.5   | 151  | 244.7   | 19.8   | 205  | <0.001  |
| 125        | Lesser Kestrel         | Mass      | 135.2  | 22.6   | 80   | 140.8   | 25.1   | 40   | 0.391   |
|            |                        | Wing      | 235.7  | 14.6   | 64   | 237.9   | 7.5    | 28   | 0.439   |
| 126        | Pygmy Falcon           | Mass      | 56.0   | 3.9    | 258  | 59.3    | 5.3    | 271  | <0.001  |
|            |                        | Tail      | 71.3   | 6.8    | 58   | 72.3    | 3.7    | 57   | 0.396   |
|            |                        | Wing      | 117.2  | 2.0    | 206  | 118.8   | 2.4    | 194  | <0.001  |
| 130        | Black-winged Kite      | Mass      | 229.2  | 21.8   | 36   | 259.2   | 24.2   | 32   | <0.001  |
| 133        | Verreaux's Eagle       | Mass      | 2383.5 | 1768.5 | 15   | 3075.9  | 2109.4 | 14   | 0.179   |
| 134        | Tawny Eagle            | Mass      | 1907.7 | 649.2  | 13   | 2588.8  | 202.0  | 13   | 0.001   |
| 137        | Wahlberg's Eagle       | Mass      | 1063.9 | 151.9  | 30   | 1314.1  | 174.4  | 32   | 0.002   |
|            |                        | Wing      | 500.5  | 215.7  | 17   | 535.0   | 252.3  | 16   | 0.675   |
| 138        | Long-crested Eagle     | Mass      | 1026.0 | 80.7   | 29   | 1150.7  | 103.1  | 42   | <0.001  |

|                               |      |        |        |      |        |        |      |        |
|-------------------------------|------|--------|--------|------|--------|--------|------|--------|
|                               | Tail | 205.3  | 8.3    | 20   | 211.4  | 6.9    | 34   | 0.010  |
|                               | Wing | 394.6  | 35.7   | 29   | 398.7  | 11.6   | 44   | 0.479  |
| 141 African Hawk-Eagle        | Mass | 1347.1 | 154.5  | 61   | 1598.5 | 153.0  | 54   | <0.001 |
|                               | Tail | 253.9  | 10.0   | 25   | 261.5  | 12.6   | 25   | 0.022  |
|                               | Wing | 448.8  | 143.9  | 41   | 511.2  | 285.4  | 39   | 0.197  |
| 142 Martial Eagle             | Mass | 3644.3 | 638.3  | 23   | 4477.2 | 926.0  | 20   | <0.001 |
|                               | Wing | 591.7  | 75.3   | 16   | 944.7  | 1077.4 | 13   | 0.051  |
| 144 Lizard Buzzard            | Mass | 259.0  | 66.1   | 39   | 311.0  | 72.8   | 64   | 0.480  |
|                               | Tail | 138.7  | 37.6   | 30   | 154.9  | 37.9   | 44   | 0.074  |
|                               | Wing | 232.6  | 24.4   | 36   | 243.0  | 27.8   | 53   | 0.072  |
| 146 Black-chested Snake Eagle | Mass | 1245.1 | 517.5  | 26   | 1618.2 | 137.8  | 29   | 0.071  |
|                               | Tail | 260.7  | 118.1  | 18   | 263.5  | 62.0   | 17   | 0.748  |
|                               | Wing | 723.2  | 431.8  | 25   | 546.6  | 306.8  | 22   | 0.464  |
| 152 Jackal Buzzard            | Mass | 963.1  | 130.0  | 203  | 1206.3 | 166.6  | 254  | <0.001 |
|                               | Tail | 177.8  | 36.8   | 87   | 182.4  | 18.7   | 106  | 0.140  |
|                               | Wing | 419.1  | 89.9   | 130  | 429.6  | 33.0   | 173  | 0.031  |
| 154 Common Buzzard            | Mass | 658.3  | 93.6   | 65   | 826.7  | 91.7   | 103  | <0.001 |
|                               | Tail | 210.3  | 57.8   | 23   | 198.2  | 6.6    | 37   | 0.184  |
|                               | Wing | 382.3  | 83.0   | 43   | 392.2  | 67.8   | 61   | 0.738  |
| 158 Little Sparrowhawk        | Mass | 76.9   | 10.9   | 62   | 109.2  | 20.3   | 44   | 0.038  |
|                               | Tail | 110.5  | 6.4    | 24   | 123.8  | 4.0    | 13   | <0.001 |
|                               | Wing | 144.2  | 7.7    | 50   | 158.6  | 9.9    | 33   | <0.001 |
| 159 Black Sparrowhawk         | Mass | 554.2  | 47.3   | 107  | 910.5  | 94.9   | 116  | <0.001 |
|                               | Tail | 214.6  | 14.3   | 35   | 256.4  | 14.3   | 29   | <0.001 |
|                               | Wing | 291.2  | 15.1   | 94   | 336.8  | 14.2   | 98   | <0.001 |
| 160 African Goshawk           | Wing | 210.2  | 13.7   | 88   | 241.2  | 12.3   | 34   | <0.001 |
| 161 Shikra                    | Mass | 121.6  | 26.3   | 60   | 136.2  | 18.5   | 62   | 0.597  |
|                               | Tail | 138.5  | 9.3    | 22   | 146.6  | 6.4    | 20   | 0.005  |
|                               | Wing | 184.8  | 15.6   | 49   | 192.6  | 5.4    | 46   | 0.002  |
| 163 Dark Chanting Goshawk     | Mass | 584.2  | 90.8   | 77   | 685.4  | 72.3   | 48   | <0.001 |
|                               | Tail | 192.6  | 46.0   | 36   | 199.9  | 39.5   | 21   | 0.549  |
|                               | Wing | 323.1  | 68.4   | 57   | 320.7  | 13.2   | 36   | 0.825  |
| 165 Pale Chanting Goshawk     | Mass | 668.5  | 80.7   | 1562 | 878.0  | 105.2  | 1755 | <0.001 |
|                               | Tail | 226.8  | 31.8   | 453  | 242.0  | 27.4   | 601  | <0.001 |
|                               | Wing | 348.2  | 41.3   | 979  | 377.9  | 56.4   | 1069 | <0.001 |
| 174 Crested Francolin         | Mass | 392.8  | 40.9   | 71   | 322.3  | 34.2   | 55   | 0.202  |
|                               | Tail | 95.9   | 5.5    | 30   | 93.1   | 14.1   | 29   | 0.310  |
|                               | Wing | 162.9  | 6.8    | 65   | 159.3  | 35.0   | 58   | 0.406  |
| 181 Cape Spurfowl             | Mass | 865.4  | 184.3  | 27   | 629.5  | 157.0  | 24   | <0.001 |
|                               | Wing | 207.0  | 39.6   | 29   | 204.9  | 13.3   | 24   | 0.735  |
| 182 Red-billed Spurfowl       | Mass | 552.8  | 68.5   | 28   | 420.9  | 73.3   | 31   | <0.001 |
|                               | Tail | 96.8   | 15.0   | 12   | 89.0   | 8.0    | 24   | 0.049  |
|                               | Wing | 186.9  | 8.3    | 29   | 172.6  | 7.6    | 35   | <0.001 |
| 183 Natal Spurfowl            | Mass | 465.1  | 84.1   | 42   | 427.5  | 123.0  | 37   | 0.027  |
|                               | Tail | 94.5   | 4.9    | 22   | 89.4   | 5.3    | 24   | 0.001  |
|                               | Wing | 178.0  | 7.7    | 33   | 167.5  | 6.8    | 40   | <0.001 |
| 185 Swainson's Spurfowl       | Mass | 731.0  | 75.8   | 44   | 537.2  | 89.4   | 50   | <0.001 |
|                               | Tail | 84.3   | 3.7    | 17   | 78.1   | 8.3    | 17   | 0.009  |
|                               | Wing | 200.5  | 7.3    | 29   | 185.4  | 8.5    | 33   | <0.001 |
| 189 Common Quail              | Mass | 88.1   | 6.7    | 479  | 93.3   | 9.5    | 30   | <0.001 |
|                               | Wing | 104.3  | 3.2    | 480  | 104.2  | 4.5    | 27   | 0.998  |
| 190 Harlequin Quail           | Mass | 73.8   | 18.2   | 11   | 81.3   | 21.2   | 15   | 0.232  |
| 192 Helmeted Guineafowl       | Mass | 1467.9 | 146.1  | 48   | 1365.8 | 205.1  | 50   | 0.028  |
|                               | Wing | 280.9  | 8.2    | 13   | 268.1  | 30.6   | 15   | 0.058  |
| 196 Common Buttonquail        | Mass | 43.5   | 8.3    | 53   | 48.6   | 11.1   | 43   | 0.012  |
|                               | Tail | 34.6   | 4.6    | 18   | 35.9   | 4.1    | 11   | 0.292  |
|                               | Wing | 77.3   | 6.6    | 44   | 78.4   | 10.8   | 34   | 0.248  |
| 203 Black Crake               | Mass | 96.7   | 7.2    | 26   | 81.2   | 9.4    | 20   | <0.001 |
|                               | Wing | 107.7  | 3.2    | 21   | 100.4  | 3.4    | 15   | <0.001 |
| 206 Buff-spotted Flufftail    | Mass | 47.4   | 4.7    | 38   | 44.5   | 5.6    | 16   | 0.085  |
|                               | Wing | 89.2   | 2.5    | 34   | 89.6   | 2.6    | 17   | 0.571  |
| 212 Red-knobbed Coot          | Mass | 888.8  | 147.4  | 28   | 789.0  | 200.3  | 11   | 0.019  |
| 217 Kori Bustard              | Mass | 9760.0 | 2011.0 | 14   | 5528.3 | 801.0  | 29   | <0.001 |
|                               | Wing | 713.3  | 39.7   | 16   | 606.5  | 20.2   | 25   | <0.001 |
| 221 Rüppell's Korhaan         | Mass | 1182.5 | 96.9   | 28   | 995.5  | 80.6   | 19   | <0.001 |
|                               | Wing | 330.7  | 11.7   | 29   | 311.8  | 7.9    | 21   | <0.001 |
| 224 Red-crested Korhaan       | Mass | 742.9  | 215.0  | 57   | 702.7  | 155.5  | 39   | 0.370  |

|                              |      |       |       |      |       |       |      |        |
|------------------------------|------|-------|-------|------|-------|-------|------|--------|
|                              | Tail | 162.1 | 42.2  | 33   | 135.1 | 42.1  | 21   | 0.021  |
|                              | Wing | 314.1 | 150.3 | 55   | 318.1 | 155.1 | 33   | 0.778  |
| 228 African Jacana           | Mass | 140.8 | 23.1  | 110  | 221.0 | 47.0  | 77   | <0.001 |
|                              | Tail | 47.8  | 6.0   | 28   | 51.5  | 4.2   | 21   | 0.020  |
|                              | Wing | 147.7 | 12.2  | 97   | 167.1 | 9.5   | 67   | <0.001 |
| 230 Greater Painted-snipe    | Mass | 116.3 | 10.3  | 68   | 131.2 | 17.0  | 51   | <0.001 |
|                              | Tail | 42.3  | 1.6   | 14   | 44.9  | 2.5   | 13   | 0.003  |
|                              | Wing | 127.9 | 5.1   | 37   | 137.2 | 5.3   | 36   | <0.001 |
| 231 African Oystercatcher    | Mass | 667.1 | 39.1  | 101  | 720.2 | 42.7  | 81   | <0.001 |
|                              | Wing | 269.1 | 7.4   | 110  | 272.8 | 7.1   | 90   | <0.001 |
| 232 Ruddy Turnstone          | Mass | 134.6 | 23.9  | 80   | 134.2 | 23.6  | 87   | 0.061  |
| 235 White-fronted Plover     | Mass | 45.4  | 5.9   | 187  | 46.8  | 6.1   | 222  | 0.002  |
|                              | Tail | 48.9  | 3.7   | 22   | 46.6  | 4.9   | 26   | 0.034  |
|                              | Wing | 107.6 | 5.1   | 77   | 108.9 | 5.0   | 96   | 0.104  |
| 236 Chestnut-banded Plover   | Mass | 39.0  | 3.6   | 23   | 38.1  | 5.4   | 46   | 0.483  |
|                              | Wing | 104.1 | 3.7   | 19   | 103.3 | 4.4   | 29   | 0.603  |
| 237 Kittlitz's Plover        | Mass | 34.5  | 2.4   | 157  | 38.9  | 4.6   | 338  | <0.001 |
|                              | Wing | 104.1 | 3.6   | 63   | 104.8 | 3.3   | 211  | 0.090  |
| 238 Three-banded Plover      | Mass | 31.1  | 2.0   | 25   | 36.9  | 4.7   | 105  | <0.001 |
|                              | Wing | 110.0 | 2.7   | 14   | 111.9 | 2.8   | 50   | 0.024  |
| 242 Crowned Lapwing          | Mass | 185.5 | 16.3  | 27   | 182.3 | 15.3  | 27   | 0.323  |
|                              | Wing | 204.9 | 5.7   | 17   | 193.8 | 3.8   | 18   | <0.001 |
| 245 Blacksmith Lapwing       | Mass | 168.4 | 15.6  | 336  | 160.8 | 14.5  | 238  | <0.001 |
|                              | Tail | 87.8  | 11.8  | 81   | 86.3  | 15.3  | 48   | 0.613  |
|                              | Wing | 214.4 | 11.6  | 221  | 209.2 | 14.1  | 198  | <0.001 |
| 247 African Wattled Lapwing  | Mass | 259.1 | 27.1  | 29   | 252.3 | 18.6  | 35   | 0.055  |
|                              | Wing | 239.1 | 7.9   | 11   | 235.8 | 9.0   | 13   | 0.351  |
| 250 African Snipe            | Mass | 114.6 | 7.9   | 54   | 127.5 | 8.7   | 48   | <0.001 |
| 251 Curlew Sandpiper         | Mass | 56.5  | 6.9   | 539  | 59.0  | 6.5   | 602  | <0.001 |
|                              | Wing | 128.7 | 2.7   | 22   | 131.0 | 3.8   | 25   | 0.065  |
| 253 Little Stint             | Mass | 22.5  | 6.4   | 779  | 24.8  | 3.0   | 784  | <0.001 |
|                              | Wing | 94.5  | 2.2   | 466  | 99.9  | 2.1   | 559  | <0.001 |
| 256 Ruff                     | Mass | 161.6 | 26.2  | 205  | 102.1 | 12.0  | 1720 | <0.001 |
|                              | Wing | 173.1 | 16.8  | 26   | 156.1 | 4.6   | 166  | <0.001 |
| 281 Collared Pratincole      | Mass | 79.7  | 18.7  | 11   | 82.3  | 7.5   | 13   | 0.845  |
| 291 Common Tern              | Mass | 405.0 | 32.4  | 3240 | 382.2 | 31.2  | 1971 | <0.001 |
|                              | Wing | 810.0 | 32.4  | 537  | 790.8 | 35.4  | 345  | <0.001 |
| 292 Antarctic Tern           | Mass | 150.3 | 5.4   | 17   | 134.6 | 7.7   | 29   | <0.001 |
| 293 Roseate Tern             | Mass | 127.0 | 10.2  | 125  | 136.0 | 16.1  | 104  | <0.001 |
|                              | Wing | 234.8 | 4.6   | 13   | 232.5 | 4.2   | 21   | 0.145  |
| 296 Sandwich Tern            | Mass | 234.5 | 17.6  | 11   | 229.8 | 22.0  | 27   | 0.026  |
| 298 Greater Crested Tern     | Mass | 415.5 | 25.6  | 42   | 386.1 | 25.2  | 43   | <0.001 |
| 307 Namaqua Sandgrouse       | Mass | 178.8 | 16.1  | 443  | 170.6 | 18.4  | 383  | <0.001 |
|                              | Tail | 111.5 | 15.1  | 92   | 94.5  | 13.0  | 94   | <0.001 |
|                              | Wing | 168.4 | 5.0   | 355  | 163.5 | 4.7   | 319  | <0.001 |
| 308 Burchell's Sandgrouse    | Mass | 199.0 | 16.7  | 187  | 194.9 | 18.4  | 118  | 0.143  |
|                              | Tail | 72.5  | 7.8   | 36   | 69.4  | 3.3   | 26   | 0.044  |
|                              | Wing | 164.3 | 4.9   | 79   | 162.7 | 5.1   | 59   | 0.093  |
| 310 Double-banded Sandgrouse | Mass | 216.8 | 21.1  | 335  | 210.2 | 25.2  | 301  | 0.164  |
|                              | Tail | 82.8  | 10.4  | 129  | 79.8  | 11.7  | 107  | 0.038  |
|                              | Wing | 175.7 | 7.4   | 302  | 171.7 | 7.5   | 272  | <0.001 |
| 311 Speckled Pigeon          | Mass | 323.8 | 43.8  | 61   | 315.1 | 42.9  | 20   | 0.013  |
|                              | Tail | 117.4 | 7.9   | 37   | 112.4 | 21.5  | 11   | 0.239  |
|                              | Wing | 229.4 | 5.6   | 59   | 218.8 | 21.9  | 17   | 0.001  |
| 314 Red-eyed Dove            | Mass | 242.9 | 29.6  | 55   | 235.1 | 27.7  | 43   | 0.130  |
|                              | Tail | 126.1 | 33.2  | 20   | 130.6 | 9.8   | 19   | 0.693  |
|                              | Wing | 188.1 | 15.7  | 46   | 187.7 | 7.2   | 38   | 0.652  |
| 316 Ring-necked Dove         | Mass | 141.5 | 16.2  | 117  | 137.5 | 22.0  | 106  | 0.167  |
|                              | Tail | 104.7 | 22.2  | 54   | 103.0 | 14.3  | 30   | 0.006  |
|                              | Wing | 157.8 | 8.3   | 88   | 155.0 | 6.3   | 65   | 0.059  |
| 317 Laughing Dove            | Mass | 98.5  | 11.3  | 896  | 96.8  | 11.3  | 795  | <0.001 |
|                              | Tail | 106.1 | 16.2  | 146  | 100.1 | 23.5  | 193  | <0.001 |
|                              | Wing | 138.7 | 8.3   | 488  | 135.6 | 10.6  | 449  | <0.001 |
| 318 Namaqua Dove             | Mass | 40.7  | 3.6   | 1657 | 39.1  | 3.8   | 1313 | <0.001 |
|                              | Tail | 136.5 | 16.3  | 348  | 130.8 | 18.9  | 273  | <0.001 |
|                              | Wing | 106.7 | 3.0   | 1359 | 104.0 | 2.9   | 1059 | <0.001 |
| 319 Tambourine Dove          | Mass | 74.0  | 5.7   | 717  | 69.7  | 5.1   | 438  | 0.819  |

|                               |      |       |      |     |       |      |     |        |
|-------------------------------|------|-------|------|-----|-------|------|-----|--------|
|                               | Tail | 90.6  | 4.2  | 274 | 87.2  | 4.1  | 191 | <0.001 |
|                               | Wing | 115.5 | 3.3  | 599 | 112.6 | 3.3  | 396 | <0.001 |
| 321 Emerald-spotted Wood Dove | Mass | 66.4  | 13.1 | 36  | 64.3  | 10.7 | 64  | 0.559  |
|                               | Tail | 77.7  | 2.2  | 14  | 78.3  | 4.2  | 24  | 0.691  |
|                               | Wing | 108.7 | 12.5 | 31  | 108.4 | 8.8  | 41  | 0.136  |
| 322 Lemon Dove                | Mass | 164.6 | 16.4 | 64  | 154.7 | 22.1 | 48  | 0.004  |
|                               | Tail | 104.7 | 13.0 | 31  | 98.7  | 20.7 | 26  | 0.191  |
|                               | Wing | 153.1 | 5.4  | 55  | 146.7 | 12.7 | 40  | 0.001  |
| 329 Rüppell's Parrot          | Mass | 112.7 | 10.3 | 18  | 115.7 | 11.8 | 30  | 0.994  |
|                               | Wing | 147.9 | 4.5  | 11  | 146.1 | 3.5  | 18  | 0.173  |
| 343 Red-chested Cuckoo        | Mass | 76.4  | 4.2  | 11  | 77.6  | 7.1  | 15  | 0.637  |
|                               | Wing | 173.8 | 4.3  | 11  | 168.5 | 29.0 | 13  | 0.936  |
| 351 Klaas's Cuckoo            | Mass | 28.4  | 3.2  | 88  | 30.3  | 3.7  | 101 | 0.960  |
|                               | Tail | 77.7  | 2.8  | 18  | 75.4  | 3.2  | 30  | 0.010  |
|                               | Wing | 101.8 | 2.7  | 61  | 102.1 | 3.4  | 78  | 0.471  |
| 352 Diederik Cuckoo           | Mass | 32.1  | 3.8  | 551 | 37.4  | 4.8  | 260 | <0.001 |
|                               | Tail | 83.9  | 9.7  | 202 | 82.9  | 13.3 | 71  | 0.783  |
|                               | Wing | 117.4 | 3.9  | 461 | 118.9 | 4.9  | 203 | <0.001 |
| 359 Barn Owl (pre-split)      | Mass | 334.6 | 34.7 | 14  | 357.0 | 55.2 | 15  | 0.900  |
|                               | Wing | 293.8 | 14.9 | 12  | 285.1 | 10.3 | 13  | 0.183  |
| 365 Pearl-spotted Owlet       | Mass | 78.5  | 9.8  | 18  | 86.6  | 8.0  | 21  | 0.339  |
|                               | Wing | 98.8  | 15.7 | 16  | 108.1 | 2.9  | 17  | 0.174  |
| 368 Spotted Eagle-Owl         | Mass | 673.1 | 89.0 | 49  | 780.5 | 97.6 | 65  | <0.001 |
|                               | Tail | 183.7 | 14.9 | 15  | 188.3 | 9.9  | 35  | 0.117  |
|                               | Wing | 325.0 | 31.4 | 30  | 334.7 | 28.0 | 52  | 0.084  |
| 371 European Nightjar         | Mass | 68.5  | 8.3  | 49  | 68.0  | 9.3  | 82  | 0.674  |
|                               | Wing | 188.6 | 9.9  | 30  | 189.0 | 9.3  | 49  | 0.713  |
| 372 Rufous-cheeked Nightjar   | Mass | 63.8  | 25.7 | 329 | 60.5  | 18.1 | 250 | 0.927  |
|                               | Tail | 124.1 | 7.9  | 74  | 120.0 | 8.9  | 69  | 0.007  |
|                               | Wing | 155.9 | 28.5 | 280 | 158.3 | 18.8 | 209 | 0.763  |
| 373 Fiery-necked Nightjar     | Mass | 54.1  | 6.2  | 154 | 57.0  | 15.2 | 241 | 0.046  |
|                               | Tail | 122.6 | 16.8 | 58  | 118.9 | 18.9 | 66  | 0.248  |
|                               | Wing | 166.3 | 7.4  | 106 | 157.2 | 26.5 | 142 | 0.002  |
| 374 Freckled Nightjar         | Mass | 68.8  | 11.5 | 40  | 73.9  | 8.4  | 27  | 0.131  |
|                               | Wing | 177.2 | 32.5 | 28  | 183.2 | 7.0  | 20  | 0.447  |
| 375 Swamp Nightjar            | Mass | 71.1  | 8.2  | 12  | 73.3  | 7.7  | 12  | 0.048  |
| 376 Square-tailed Nightjar    | Mass | 60.2  | 13.8 | 145 | 65.0  | 24.3 | 142 | 0.257  |
|                               | Tail | 127.1 | 7.9  | 19  | 120.1 | 7.3  | 17  | 0.002  |
|                               | Wing | 159.1 | 20.7 | 80  | 151.8 | 27.5 | 84  | 0.084  |
| 387 African Palm Swift        | Mass | 14.9  | 0.7  | 12  | 15.5  | 1.5  | 11  | 0.066  |
| 390 Speckled Mousebird        | Mass | 50.3  | 5.0  | 92  | 51.9  | 5.9  | 72  | 0.020  |
|                               | Wing | 92.7  | 2.9  | 69  | 92.3  | 2.6  | 53  | 0.327  |
| 391 White-backed Mousebird    | Mass | 44.3  | 5.5  | 14  | 42.1  | 3.6  | 15  | 0.901  |
| 392 Red-faced Mousebird       | Mass | 58.9  | 7.3  | 58  | 54.9  | 4.0  | 100 | <0.001 |
|                               | Tail | 201.2 | 69.6 | 24  | 170.3 | 84.7 | 20  | 0.134  |
|                               | Wing | 96.4  | 3.3  | 37  | 93.3  | 5.2  | 36  | 0.003  |
| 393 Narina Trogon             | Mass | 67.6  | 6.1  | 47  | 68.5  | 6.0  | 34  | 0.643  |
|                               | Tail | 170.4 | 6.9  | 23  | 171.2 | 5.9  | 16  | 0.709  |
|                               | Wing | 130.0 | 9.9  | 43  | 130.5 | 5.1  | 32  | 0.903  |
| 394 Pied Kingfisher           | Mass | 79.4  | 7.7  | 151 | 80.9  | 9.2  | 195 | 0.054  |
|                               | Tail | 79.0  | 4.1  | 56  | 80.0  | 4.3  | 64  | 0.282  |
|                               | Wing | 138.7 | 3.0  | 111 | 139.1 | 3.0  | 158 | 0.242  |
| 395 Giant Kingfisher          | Mass | 335.2 | 42.7 | 101 | 347.8 | 60.9 | 102 | 0.027  |
|                               | Tail | 119.8 | 8.5  | 24  | 120.2 | 4.7  | 31  | 0.968  |
|                               | Wing | 200.9 | 13.3 | 82  | 206.1 | 5.9  | 86  | 0.006  |
| 397 Malachite Kingfisher      | Mass | 20.6  | 10.5 | 16  | 17.1  | 2.0  | 14  | 0.304  |
|                               | Wing | 59.2  | 2.1  | 12  | 57.3  | 2.5  | 13  | 0.077  |
| 398 African Pygmy Kingfisher  | Mass | 14.6  | 1.6  | 11  | 15.5  | 2.1  | 43  | 0.311  |
| 399 Woodland Kingfisher       | Mass | 64.5  | 9.1  | 57  | 65.9  | 8.3  | 32  | 0.731  |
|                               | Tail | 67.6  | 5.3  | 48  | 69.1  | 4.6  | 18  | 0.738  |
|                               | Wing | 111.5 | 4.5  | 56  | 112.6 | 2.6  | 27  | 0.255  |
| 402 Brown-hooded Kingfisher   | Mass | 63.4  | 6.8  | 830 | 65.7  | 7.5  | 872 | 0.566  |
|                               | Tail | 69.1  | 4.4  | 327 | 69.5  | 4.0  | 369 | 0.158  |
|                               | Wing | 105.0 | 5.2  | 733 | 105.6 | 6.5  | 781 | 0.013  |
| 404 European Bee-eater        | Mass | 51.6  | 3.5  | 41  | 51.0  | 5.6  | 63  | 0.530  |
|                               | Wing | 149.4 | 4.6  | 26  | 144.9 | 4.0  | 48  | <0.001 |
| 418 African Hoopoe            | Mass | 60.6  | 9.8  | 240 | 55.9  | 10.1 | 172 | <0.001 |

|                                     |      |       |       |     |       |       |     |        |
|-------------------------------------|------|-------|-------|-----|-------|-------|-----|--------|
|                                     | Tail | 94.4  | 4.7   | 67  | 91.7  | 4.0   | 54  | 0.001  |
|                                     | Wing | 138.1 | 10.7  | 182 | 133.4 | 8.6   | 133 | <0.001 |
| 419 Green Wood Hoopoe               | Mass | 82.6  | 7.0   | 330 | 70.1  | 6.0   | 323 | <0.001 |
|                                     | Tail | 218.4 | 38.7  | 50  | 212.4 | 22.4  | 37  | 0.390  |
|                                     | Wing | 142.6 | 7.3   | 329 | 134.3 | 7.2   | 321 | <0.001 |
| 421 Common Scimitarbill             | Mass | 36.8  | 11.2  | 45  | 30.4  | 4.5   | 37  | 0.819  |
|                                     | Wing | 110.2 | 4.5   | 35  | 103.0 | 6.0   | 35  | <0.001 |
| 424 African Grey Hornbill           | Mass | 188.3 | 26.8  | 75  | 193.0 | 31.0  | 112 | 0.058  |
|                                     | Tail | 209.0 | 17.4  | 36  | 174.4 | 43.2  | 14  | <0.001 |
|                                     | Wing | 221.3 | 7.3   | 73  | 200.4 | 15.3  | 85  | <0.001 |
| 425 Red-billed Hornbill (pre-split) | Mass | 169.2 | 20.4  | 151 | 145.6 | 22.5  | 99  | 0.008  |
|                                     | Tail | 207.1 | 10.2  | 48  | 190.4 | 23.7  | 24  | <0.001 |
|                                     | Wing | 185.0 | 7.4   | 134 | 175.3 | 7.5   | 70  | <0.001 |
| 426 Southern Yellow-billed Hornbill | Mass | 230.5 | 40.4  | 276 | 220.2 | 37.2  | 263 | 0.030  |
|                                     | Tail | 218.1 | 31.1  | 128 | 196.9 | 40.1  | 62  | <0.001 |
|                                     | Wing | 203.5 | 11.0  | 242 | 189.8 | 13.0  | 174 | <0.001 |
| 427 Crowned Hornbill                | Mass | 259.9 | 27.5  | 16  | 246.2 | 18.4  | 11  | 0.835  |
| 429 Monteiro's Hornbill             | Mass | 376.1 | 42.7  | 16  | 370.3 | 289.5 | 163 | 0.169  |
|                                     | Wing | 219.8 | 22.4  | 13  | 197.2 | 7.2   | 60  | <0.001 |
| 430 Southern Ground Hornbill        | Tail | 356.5 | 13.2  | 13  | 332.1 | 16.5  | 14  | <0.001 |
| 431 Black-collared Barbet           | Mass | 56.4  | 5.8   | 62  | 58.5  | 5.0   | 127 | 0.563  |
|                                     | Tail | 61.6  | 5.8   | 22  | 59.9  | 9.0   | 46  | 0.355  |
|                                     | Wing | 91.7  | 3.8   | 49  | 92.7  | 2.8   | 106 | 0.406  |
| 432 Acacia Pied Barbet              | Mass | 34.8  | 4.5   | 82  | 35.5  | 8.1   | 277 | 0.415  |
|                                     | Tail | 52.0  | 5.7   | 30  | 50.2  | 3.8   | 110 | 0.003  |
|                                     | Wing | 82.3  | 3.1   | 54  | 81.1  | 4.4   | 222 | <0.001 |
| 437 Yellow-fronted Tinkerbird       | Mass | 13.5  | 0.8   | 15  | 13.7  | 1.3   | 39  | 0.129  |
| 439 Crested Barbet                  | Mass | 73.9  | 7.5   | 253 | 70.5  | 7.9   | 343 | 0.017  |
|                                     | Tail | 90.7  | 10.0  | 99  | 89.7  | 10.3  | 135 | 0.510  |
|                                     | Wing | 103.2 | 4.9   | 206 | 101.7 | 5.2   | 279 | 0.002  |
| 440 Greater Honeyguide              | Mass | 52.8  | 4.5   | 105 | 50.4  | 5.4   | 80  | 0.006  |
|                                     | Tail | 77.0  | 5.2   | 47  | 69.3  | 10.1  | 34  | <0.001 |
|                                     | Wing | 111.7 | 7.2   | 91  | 106.8 | 7.8   | 66  | <0.001 |
| 441 Scaly-throated Honeyguide       | Mass | 78.9  | 111.2 | 17  | 75.5  | 93.4  | 23  | 0.733  |
|                                     | Wing | 109.1 | 3.2   | 11  | 101.0 | 16.6  | 18  | 0.025  |
| 442 Lesser Honeyguide               | Mass | 28.8  | 4.0   | 140 | 29.0  | 2.5   | 123 | 0.351  |
|                                     | Tail | 61.1  | 6.9   | 25  | 58.3  | 8.7   | 39  | 0.184  |
|                                     | Wing | 91.2  | 10.0  | 90  | 87.4  | 7.1   | 92  | 0.013  |
| 445 Ground Woodpecker               | Mass | 109.7 | 16.4  | 29  | 113.3 | 10.1  | 17  | 0.148  |
| 446 Bennett's Woodpecker            | Mass | 81.7  | 6.7   | 37  | 80.2  | 8.9   | 43  | 0.066  |
|                                     | Tail | 74.0  | 6.1   | 17  | 74.8  | 6.1   | 18  | 0.687  |
|                                     | Wing | 124.7 | 3.5   | 30  | 124.5 | 3.5   | 35  | 0.767  |
| 447 Golden-tailed Woodpecker        | Mass | 67.6  | 6.7   | 216 | 65.6  | 7.1   | 188 | 0.005  |
|                                     | Tail | 68.8  | 8.7   | 82  | 70.5  | 5.6   | 58  | 0.208  |
|                                     | Wing | 113.2 | 8.9   | 187 | 113.9 | 7.0   | 156 | 0.890  |
| 448 Knysna Woodpecker               | Mass | 65.8  | 4.1   | 30  | 60.9  | 4.2   | 26  | 0.003  |
|                                     | Wing | 106.3 | 2.5   | 27  | 105.5 | 3.3   | 24  | 0.072  |
| 450 Cardinal Woodpecker             | Mass | 32.6  | 2.4   | 341 | 31.2  | 2.5   | 246 | 0.602  |
|                                     | Tail | 52.3  | 4.6   | 110 | 52.7  | 4.4   | 83  | 0.590  |
|                                     | Wing | 95.0  | 2.9   | 277 | 94.3  | 3.1   | 219 | 0.001  |
| 451 Bearded Woodpecker              | Mass | 85.1  | 12.4  | 41  | 77.6  | 7.5   | 28  | 0.002  |
|                                     | Tail | 70.0  | 4.5   | 11  | 70.4  | 7.1   | 14  | 0.864  |
|                                     | Wing | 128.5 | 12.6  | 37  | 131.5 | 3.9   | 24  | 0.030  |
| 452 Olive Woodpecker                | Mass | 51.2  | 5.8   | 70  | 46.6  | 4.2   | 54  | <0.001 |
|                                     | Tail | 72.9  | 3.5   | 30  | 70.8  | 3.0   | 17  | 0.040  |
|                                     | Wing | 109.6 | 3.0   | 65  | 107.4 | 2.6   | 41  | <0.001 |
| 454 African Broadbill               | Mass | 23.9  | 1.5   | 51  | 23.8  | 1.9   | 36  | 0.596  |
|                                     | Tail | 54.2  | 1.7   | 29  | 51.8  | 2.3   | 17  | <0.001 |
|                                     | Wing | 71.6  | 1.5   | 41  | 70.9  | 1.5   | 29  | 0.071  |
| 458 Rufous-naped Lark               | Mass | 45.8  | 4.5   | 40  | 69.8  | 55.3  | 38  | 0.005  |
|                                     | Tail | 63.6  | 12.2  | 25  | 53.6  | 16.6  | 16  | 0.020  |
|                                     | Wing | 99.8  | 2.7   | 31  | 91.1  | 3.3   | 23  | <0.001 |
| 460 Sabota Lark                     | Mass | 25.8  | 3.4   | 53  | 25.9  | 3.6   | 100 | 0.818  |
|                                     | Tail | 54.5  | 3.3   | 40  | 52.8  | 4.4   | 72  | 0.029  |
|                                     | Wing | 87.9  | 2.3   | 44  | 85.2  | 4.9   | 91  | 0.004  |
| 474 Spike-heeled Lark               | Mass | 31.4  | 2.6   | 54  | 25.8  | 2.8   | 67  | <0.001 |
| 484 Chestnut-backed Sparrow-Lark    | Mass | 18.6  | 1.2   | 35  | 18.6  | 1.4   | 51  | 0.764  |

|                                 |      |       |      |      |       |      |      |        |
|---------------------------------|------|-------|------|------|-------|------|------|--------|
| 485 Grey-backed Sparrow-Lark    | Wing | 83.3  | 2.0  | 27   | 81.7  | 2.7  | 42   | 0.009  |
|                                 | Mass | 17.0  | 1.4  | 232  | 16.9  | 1.5  | 498  | 0.245  |
|                                 | Tail | 47.6  | 2.4  | 31   | 45.7  | 2.9  | 51   | 0.002  |
| 488 Red-capped Lark             | Wing | 81.2  | 2.1  | 168  | 79.1  | 2.4  | 299  | <0.001 |
|                                 | Mass | 26.6  | 2.3  | 22   | 25.6  | 2.2  | 11   | 0.170  |
|                                 | Tail | 48.9  | 2.5  | 30   | 46.9  | 2.5  | 129  | <0.001 |
| 492 Stark's Lark                | Wing | 83.9  | 2.4  | 29   | 81.3  | 2.6  | 129  | <0.001 |
|                                 | Mass | 19.1  | 1.7  | 1762 | 18.7  | 1.7  | 1936 | 0.008  |
|                                 | Tail | 90.1  | 17.9 | 574  | 76.4  | 13.0 | 1014 | <0.001 |
| 493 Barn Swallow                | Wing | 122.2 | 3.9  | 1165 | 121.4 | 3.5  | 1475 | <0.001 |
|                                 | Mass | 21.4  | 1.9  | 47   | 20.9  | 2.1  | 55   | 0.242  |
|                                 | Tail | 64.2  | 22.0 | 11   | 63.7  | 16.1 | 16   | 0.520  |
| 495 White-throated Swallow      | Wing | 132.6 | 3.1  | 32   | 130.0 | 5.1  | 42   | 0.008  |
|                                 | Mass | 12.8  | 1.1  | 20   | 13.3  | 1.1  | 19   | 0.471  |
|                                 | Tail | 110.9 | 3.2  | 11   | 109.0 | 3.1  | 13   | 0.154  |
| 496 Wire-tailed Swallow         | Wing | 110.9 | 3.2  | 11   | 109.0 | 3.1  | 13   | 0.154  |
|                                 | Mass | 28.3  | 2.0  | 14   | 28.7  | 3.0  | 11   | 0.765  |
|                                 | Tail | 27.3  | 5.8  | 93   | 26.3  | 3.1  | 107  | 0.120  |
| 501 Red-breasted Swallow        | Wing | 95.6  | 16.4 | 21   | 91.6  | 15.4 | 24   | 0.405  |
|                                 | Mass | 126.4 | 7.2  | 65   | 124.5 | 5.5  | 77   | 0.044  |
|                                 | Tail | 17.5  | 1.9  | 498  | 17.0  | 1.7  | 495  | 0.011  |
| 502 Greater Striped Swallow     | Wing | 91.7  | 20.9 | 67   | 75.8  | 14.2 | 64   | <0.001 |
|                                 | Mass | 109.9 | 7.8  | 249  | 108.1 | 3.1  | 212  | <0.001 |
|                                 | Tail | 21.5  | 1.7  | 385  | 21.4  | 1.9  | 706  | 0.177  |
| 503 Lesser Striped Swallow      | Wing | 55.4  | 2.4  | 54   | 56.0  | 2.7  | 142  | 0.123  |
|                                 | Mass | 110.7 | 15.2 | 150  | 110.4 | 15.2 | 404  | 0.921  |
|                                 | Tail | 11.8  | 1.1  | 16   | 13.0  | 1.1  | 31   | 0.277  |
| 504 South African Cliff Swallow | Wing | 11.5  | 0.8  | 166  | 11.5  | 0.9  | 198  | 0.993  |
|                                 | Mass | 107.7 | 3.7  | 79   | 101.6 | 3.8  | 132  | <0.001 |
|                                 | Tail | 11.2  | 0.5  | 42   | 11.3  | 0.8  | 16   | 0.421  |
| 509 Brown-throated Martin       | Wing | 32.7  | 3.8  | 86   | 34.8  | 7.0  | 97   | 0.040  |
|                                 | Mass | 100.2 | 4.3  | 35   | 96.3  | 16.0 | 35   | 0.698  |
|                                 | Tail | 104.9 | 3.1  | 79   | 100.8 | 11.2 | 83   | 0.002  |
| 511 Black Saw-wing              | Wing | 20.6  | 3.9  | 14   | 21.0  | 5.7  | 23   | 0.452  |
|                                 | Mass | 79.8  | 3.9  | 11   | 77.7  | 3.9  | 21   | 0.092  |
|                                 | Tail | 51.0  | 13.2 | 57   | 49.6  | 7.0  | 74   | 0.422  |
| 512 Eastern saw-winged swallow  | Wing | 112.2 | 18.4 | 13   | 117.7 | 6.0  | 30   | 0.204  |
|                                 | Mass | 134.3 | 8.7  | 38   | 133.2 | 4.9  | 62   | 0.407  |
|                                 | Tail | 27.5  | 2.6  | 18   | 26.3  | 4.1  | 14   | 0.021  |
| 513 Black Cuckooshrike          | Wing | 102.1 | 3.7  | 14   | 99.8  | 3.8  | 12   | 0.142  |
|                                 | Mass | 68.9  | 8.4  | 51   | 71.7  | 16.3 | 43   | 0.403  |
|                                 | Tail | 140.6 | 3.2  | 36   | 136.2 | 3.7  | 26   | <0.001 |
| 514 Ashy Tit                    | Wing | 23.0  | 3.9  | 276  | 22.6  | 8.3  | 249  | 0.214  |
|                                 | Mass | 74.5  | 3.8  | 57   | 70.3  | 9.7  | 77   | 0.002  |
|                                 | Tail | 83.4  | 8.5  | 232  | 80.0  | 7.5  | 215  | <0.001 |
| 517 Fork-tailed Drongo          | Wing | 6.6   | 0.3  | 25   | 7.8   | 5.5  | 26   | 0.405  |
|                                 | Mass | 75.9  | 8.3  | 30   | 77.8  | 8.8  | 82   | 0.843  |
|                                 | Tail | 95.9  | 29.5 | 16   | 103.0 | 19.0 | 54   | 0.818  |
| 518 Square-tailed Drongo        | Wing | 109.2 | 4.2  | 26   | 107.2 | 8.7  | 75   | 0.514  |
|                                 | Mass | 58.6  | 8.0  | 58   | 54.1  | 9.9  | 44   | 0.001  |
|                                 | Tail | 99.8  | 5.4  | 34   | 96.0  | 5.1  | 31   | 0.005  |
| 521 Black-headed Oriole         | Wing | 89.7  | 3.2  | 50   | 85.1  | 3.7  | 41   | <0.001 |
|                                 | Mass | 38.0  | 2.5  | 322  | 36.0  | 2.5  | 690  | 0.013  |
|                                 | Tail | 88.6  | 2.8  | 39   | 84.5  | 3.0  | 150  | <0.001 |
| 527 Southern Black Tit          | Wing | 95.4  | 2.4  | 219  | 90.1  | 2.4  | 540  | <0.001 |
|                                 | Mass | 33.8  | 4.5  | 428  | 31.5  | 4.1  | 502  | <0.001 |
|                                 | Tail | 81.1  | 7.5  | 130  | 80.5  | 6.4  | 175  | 0.321  |
| 531 Cape Penduline Tit          | Wing | 96.1  | 7.0  | 283  | 92.4  | 5.3  | 377  | <0.001 |
|                                 | Mass | 40.8  | 3.3  | 1049 | 38.2  | 3.5  | 1296 | <0.001 |
|                                 | Tail | 89.3  | 4.0  | 236  | 86.4  | 3.5  | 325  | <0.001 |
| 533 African Spotted Creeper     | Wing | 98.9  | 3.7  | 463  | 94.5  | 3.4  | 725  | <0.001 |
|                                 | Mass | 37.4  | 5.3  | 269  | 32.5  | 5.2  | 283  | <0.001 |
|                                 | Tail | 94.0  | 4.0  | 84   | 86.5  | 4.4  | 103  | <0.001 |
| 540 Cape Rockjumper             | Wing | 91.2  | 4.2  | 209  | 82.8  | 3.7  | 232  | <0.001 |
|                                 | Mass | 35.3  | 2.7  | 42   | 29.1  | 3.3  | 29   | <0.001 |
|                                 | Tail | 40.1  | 2.2  | 40   | 38.2  | 2.8  | 80   | <0.001 |
| 543 Cape Bulbul                 | Wing | 44.3  | 5.8  | 184  | 41.6  | 4.2  | 114  | <0.001 |
|                                 | Mass |       |      |      |       |      |      |        |
|                                 | Tail |       |      |      |       |      |      |        |
| 544 African Red-eyed Bulbul     | Wing |       |      |      |       |      |      |        |
|                                 | Mass |       |      |      |       |      |      |        |
|                                 | Tail |       |      |      |       |      |      |        |
| 545 Dark-capped Bulbul          | Wing |       |      |      |       |      |      |        |
|                                 | Mass |       |      |      |       |      |      |        |
|                                 | Tail |       |      |      |       |      |      |        |
| 546 Terrestrial Brownbul        | Wing |       |      |      |       |      |      |        |
|                                 | Mass |       |      |      |       |      |      |        |
|                                 | Tail |       |      |      |       |      |      |        |
| 547 Yellow-streaked Greenbul    | Wing |       |      |      |       |      |      |        |
|                                 | Mass |       |      |      |       |      |      |        |
|                                 | Tail |       |      |      |       |      |      |        |
| 549 Stripe-cheeked Greenbul     | Wing |       |      |      |       |      |      |        |
|                                 | Mass |       |      |      |       |      |      |        |
|                                 | Tail |       |      |      |       |      |      |        |
| 550 Yellow-bellied Greenbul     | Wing |       |      |      |       |      |      |        |
|                                 | Mass |       |      |      |       |      |      |        |
|                                 | Tail |       |      |      |       |      |      |        |

|                               |      |       |      |      |       |      |     |        |
|-------------------------------|------|-------|------|------|-------|------|-----|--------|
| 551 Sombre Greenbul           | Tail | 97.9  | 4.3  | 93   | 91.5  | 10.5 | 52  | <0.001 |
|                               | Wing | 104.7 | 4.5  | 146  | 97.6  | 4.4  | 102 | <0.001 |
|                               | Mass | 33.1  | 3.4  | 130  | 33.4  | 3.7  | 181 | 0.030  |
| 552 Kurrichane Thrush         | Tail | 89.1  | 4.3  | 18   | 86.4  | 3.0  | 65  | <0.001 |
|                               | Wing | 90.3  | 2.8  | 66   | 88.1  | 3.3  | 157 | <0.001 |
|                               | Mass | 63.0  | 6.4  | 163  | 66.5  | 7.2  | 148 | <0.001 |
| 557 Groundscraper Thrush      | Tail | 98.3  | 5.3  | 37   | 92.5  | 10.6 | 57  | 0.002  |
|                               | Wing | 118.9 | 6.0  | 67   | 116.0 | 4.2  | 104 | <0.001 |
|                               | Mass | 79.0  | 8.6  | 28   | 75.1  | 8.8  | 30  | 0.052  |
| 559 Cape Rock Thrush          | Tail | 67.3  | 13.4 | 13   | 68.9  | 16.9 | 17  | 0.777  |
|                               | Wing | 130.5 | 2.9  | 24   | 127.4 | 3.6  | 26  | 0.001  |
|                               | Mass | 63.4  | 4.5  | 121  | 59.5  | 5.8  | 86  | <0.001 |
| 560 Sentinel Rock Thrush      | Tail | 79.4  | 3.0  | 54   | 75.5  | 8.4  | 37  | <0.001 |
|                               | Wing | 113.5 | 3.8  | 106  | 109.7 | 3.2  | 79  | <0.001 |
|                               | Mass | 46.0  | 3.2  | 58   | 44.2  | 3.9  | 70  | 0.003  |
| 561 Short-toed Rock Thrush    | Tail | 61.8  | 2.4  | 14   | 60.1  | 2.5  | 21  | 0.034  |
|                               | Wing | 104.0 | 3.5  | 59   | 100.2 | 3.0  | 72  | <0.001 |
|                               | Mass | 36.8  | 7.8  | 164  | 35.5  | 7.5  | 91  | 0.587  |
| 564 Mountain Wheatear         | Tail | 65.3  | 3.7  | 37   | 62.5  | 2.5  | 24  | 0.001  |
|                               | Wing | 102.1 | 5.0  | 155  | 98.2  | 3.3  | 92  | <0.001 |
|                               | Mass | 33.8  | 5.9  | 282  | 33.0  | 5.2  | 245 | 0.112  |
| 566 Karoo Chat                | Tail | 72.8  | 4.5  | 134  | 69.7  | 4.1  | 109 | <0.001 |
|                               | Wing | 109.9 | 5.0  | 258  | 104.7 | 5.4  | 225 | <0.001 |
|                               | Mass | 20.9  | 2.5  | 76   | 20.2  | 2.0  | 38  | 0.161  |
| 568 Capped Wheatear           | Tail | 65.3  | 4.5  | 75   | 63.4  | 3.1  | 35  | 0.027  |
|                               | Wing | 92.5  | 4.1  | 79   | 89.5  | 3.6  | 38  | <0.001 |
|                               | Mass | 60.0  | 7.5  | 107  | 59.1  | 4.8  | 39  | 0.062  |
| 569 Buff-streaked Chat        | Tail | 115.3 | 18.4 | 78   | 59.1  | 3.7  | 16  | 0.367  |
|                               | Wing | 185.9 | 7.1  | 103  | 181.7 | 7.3  | 38  | 0.005  |
|                               | Mass | 77.8  | 6.0  | 389  | 36.8  | 3.0  | 145 | <0.001 |
| 570 Familiar Chat             | Tail | 123.6 | 6.2  | 68   | 117.2 | 7.6  | 31  | 0.022  |
|                               | Wing | 189.3 | 6.8  | 385  | 90.5  | 2.9  | 144 | <0.001 |
|                               | Mass | 20.1  | 2.2  | 59   | 19.8  | 4.0  | 49  | 0.287  |
| 573 Mocking Cliff Chat        | Tail | 61.7  | 7.3  | 37   | 58.4  | 7.0  | 28  | 0.018  |
|                               | Wing | 87.2  | 7.4  | 57   | 82.6  | 7.4  | 49  | <0.001 |
|                               | Mass | 50.1  | 3.6  | 128  | 46.8  | 3.3  | 80  | 0.509  |
| 575 Ant-eating Chat           | Tail | 94.0  | 10.6 | 52   | 90.5  | 10.7 | 31  | 0.138  |
|                               | Wing | 113.9 | 6.5  | 114  | 108.5 | 7.2  | 77  | <0.001 |
|                               | Mass | 46.6  | 4.4  | 526  | 44.4  | 4.8  | 489 | <0.001 |
| 576 African Stonechat         | Tail | 60.0  | 3.4  | 213  | 57.7  | 3.1  | 226 | <0.001 |
|                               | Wing | 99.6  | 4.1  | 467  | 96.0  | 3.3  | 422 | <0.001 |
|                               | Mass | 15.9  | 1.6  | 979  | 15.6  | 2.2  | 687 | 0.736  |
| 578 Chorister Robin-Chat      | Tail | 52.3  | 4.2  | 409  | 51.5  | 2.7  | 246 | 0.004  |
|                               | Wing | 71.1  | 2.6  | 839  | 69.2  | 2.5  | 551 | <0.001 |
|                               | Mass | 40.3  | 3.8  | 50   | 40.4  | 5.3  | 51  | 0.778  |
| 579 Red-capped Robin-Chat     | Tail | 86.7  | 4.1  | 23   | 81.3  | 13.1 | 18  | 0.390  |
|                               | Wing | 101.8 | 3.5  | 44   | 96.4  | 9.0  | 48  | <0.001 |
|                               | Mass | 32.8  | 19.0 | 212  | 30.2  | 2.7  | 172 | 0.077  |
| 580 White-browed Robin-Chat   | Tail | 78.9  | 7.2  | 79   | 71.9  | 3.1  | 74  | <0.001 |
|                               | Wing | 92.2  | 5.3  | 168  | 85.1  | 7.5  | 160 | <0.001 |
|                               | Mass | 39.9  | 3.6  | 149  | 34.1  | 3.7  | 111 | <0.001 |
| 581 Cape Robin-Chat           | Tail | 92.3  | 4.7  | 50   | 81.9  | 4.1  | 32  | <0.001 |
|                               | Wing | 99.1  | 3.9  | 90   | 90.6  | 3.3  | 58  | <0.001 |
|                               | Mass | 29.6  | 2.2  | 1004 | 28.3  | 2.3  | 799 | <0.001 |
| 582 White-throated Robin-Chat | Tail | 86.0  | 4.9  | 279  | 79.0  | 4.8  | 288 | <0.001 |
|                               | Wing | 90.1  | 3.7  | 777  | 84.3  | 3.8  | 725 | <0.001 |
|                               | Mass | 23.1  | 1.9  | 116  | 22.3  | 2.8  | 40  | 0.114  |
| 583 Karoo Scrub Robin         | Tail | 76.3  | 4.4  | 40   | 71.2  | 5.1  | 23  | <0.001 |
|                               | Wing | 81.3  | 2.8  | 96   | 76.5  | 3.2  | 38  | <0.001 |
|                               | Mass | 22.4  | 1.3  | 158  | 21.6  | 1.8  | 173 | <0.001 |
| 584 Brown Scrub Robin         | Tail | 75.0  | 3.6  | 15   | 69.3  | 5.7  | 25  | 0.009  |
|                               | Wing | 63.8  | 19.6 | 54   | 67.3  | 12.3 | 81  | 0.511  |
|                               | Mass | 32.8  | 3.0  | 52   | 28.4  | 2.3  | 18  | 0.110  |
| 585 Bearded Scrub Robin       | Wing | 87.0  | 3.3  | 50   | 77.3  | 11.1 | 19  | <0.001 |
|                               | Mass | 37.8  | 52.6 | 22   | 24.4  | 3.7  | 20  | 0.184  |
|                               | Wing | 80.9  | 12.4 | 20   | 79.7  | 4.7  | 20  | 0.007  |
| 586 Kalahari Scrub Robin      | Mass | 20.9  | 4.0  | 60   | 19.7  | 2.0  | 70  | 0.729  |

|                              |      |      |      |     |      |      |     |        |
|------------------------------|------|------|------|-----|------|------|-----|--------|
| 588 White-browed Scrub Robin | Tail | 66.1 | 5.1  | 27  | 65.3 | 2.4  | 26  | 0.422  |
|                              | Wing | 72.1 | 4.8  | 45  | 69.8 | 2.1  | 63  | 0.001  |
|                              | Mass | 20.1 | 6.9  | 119 | 21.0 | 6.8  | 110 | 0.375  |
| 589 White-starred Robin      | Tail | 65.2 | 9.7  | 50  | 62.4 | 8.4  | 54  | 0.120  |
|                              | Wing | 69.6 | 8.5  | 99  | 66.9 | 3.1  | 95  | 0.003  |
|                              | Mass | 22.0 | 1.9  | 89  | 21.0 | 1.9  | 62  | 0.057  |
| 594 Common Whitethroat       | Tail | 67.0 | 4.9  | 27  | 62.3 | 3.8  | 15  | <0.001 |
|                              | Wing | 88.6 | 5.1  | 50  | 82.6 | 3.5  | 43  | <0.001 |
|                              | Mass | 15.0 | 1.6  | 28  | 15.5 | 1.6  | 49  | 0.215  |
| 599 Willow Warbler           | Tail | 63.8 | 3.0  | 13  | 63.3 | 3.4  | 26  | 0.835  |
|                              | Wing | 72.5 | 2.2  | 24  | 72.6 | 2.1  | 46  | 0.693  |
|                              | Mass | 8.6  | 0.8  | 81  | 9.4  | 8.0  | 75  | 0.114  |
| 600 Yellow-bellied Eremomela | Tail | 51.8 | 3.1  | 19  | 49.4 | 3.4  | 35  | 0.012  |
|                              | Wing | 67.0 | 4.3  | 42  | 63.7 | 3.9  | 42  | <0.001 |
|                              | Mass | 7.3  | 0.5  | 11  | 7.5  | 0.8  | 22  | 0.595  |
| 601 Burnt-necked Eremomela   | Mass | 8.5  | 0.8  | 16  | 8.8  | 0.6  | 16  | 0.750  |
|                              | Wing | 54.8 | 2.7  | 15  | 53.6 | 2.4  | 16  | 0.164  |
|                              | Mass | 31.1 | 3.3  | 73  | 29.0 | 3.7  | 64  | <0.001 |
| 603 Great Reed Warbler       | Tail | 78.6 | 14.0 | 15  | 76.1 | 3.4  | 17  | <0.001 |
|                              | Wing | 98.7 | 3.4  | 45  | 91.2 | 5.1  | 46  | <0.001 |
|                              | Mass | 17.9 | 2.0  | 466 | 17.1 | 2.1  | 318 | <0.001 |
| 604 Lesser Swamp Warbler     | Tail | 69.3 | 3.9  | 64  | 65.7 | 4.4  | 82  | <0.001 |
|                              | Wing | 72.6 | 3.0  | 228 | 69.5 | 3.7  | 252 | <0.001 |
|                              | Mass | 10.1 | 0.8  | 364 | 10.4 | 1.0  | 894 | 0.045  |
| 606 African Reed Warbler     | Tail | 52.9 | 2.2  | 99  | 51.3 | 2.5  | 285 | <0.001 |
|                              | Wing | 59.1 | 1.9  | 229 | 58.5 | 1.8  | 609 | <0.001 |
|                              | Mass | 12.0 | 2.4  | 20  | 11.8 | 1.4  | 13  | 0.791  |
| 608 Sedge Warbler            | Mass | 15.4 | 1.5  | 86  | 14.9 | 1.8  | 117 | 0.035  |
| 609 Little Rush Warbler      | Wing | 59.3 | 2.3  | 53  | 59.0 | 2.7  | 102 | 0.908  |
| 614 Barred Wren-Warbler      | Mass | 14.2 | 7.9  | 43  | 13.6 | 8.4  | 34  | 0.745  |
|                              | Tail | 56.1 | 3.8  | 23  | 51.6 | 3.1  | 16  | <0.001 |
|                              | Wing | 59.6 | 8.2  | 40  | 58.4 | 2.3  | 27  | 0.447  |
| 618 Cape Grassbird           | Mass | 32.5 | 2.0  | 22  | 30.8 | 2.7  | 26  | 0.076  |
|                              | Wing | 73.2 | 3.2  | 14  | 69.8 | 3.6  | 17  | <0.001 |
|                              | Mass | 13.5 | 8.4  | 72  | 13.3 | 8.7  | 144 | 0.162  |
| 621 Long-billed Crombec      | Tail | 27.3 | 2.8  | 24  | 26.4 | 2.4  | 67  | 0.153  |
|                              | Wing | 61.5 | 7.4  | 55  | 58.7 | 8.7  | 127 | 0.010  |
|                              | Mass | 11.0 | 0.8  | 835 | 11.0 | 1.0  | 771 | 0.541  |
| 622 Bar-throated Apalis      | Tail | 55.5 | 3.6  | 151 | 52.8 | 3.5  | 156 | <0.001 |
|                              | Wing | 52.7 | 2.2  | 745 | 51.2 | 2.2  | 659 | <0.001 |
|                              | Mass | 10.7 | 5.5  | 61  | 9.6  | 0.8  | 44  | 0.007  |
| 624 Rudd's Apalis            | Tail | 56.1 | 5.0  | 19  | 52.5 | 3.0  | 16  | 0.017  |
|                              | Wing | 49.2 | 6.3  | 49  | 47.7 | 2.1  | 40  | <0.001 |
|                              | Mass | 8.3  | 0.7  | 211 | 7.9  | 0.8  | 195 | 0.041  |
| 625 Yellow-breasted Apalis   | Tail | 51.8 | 5.6  | 75  | 48.1 | 3.4  | 84  | <0.001 |
|                              | Wing | 50.4 | 1.8  | 174 | 48.1 | 1.8  | 166 | <0.001 |
|                              | Mass | 11.8 | 3.2  | 41  | 11.0 | 2.5  | 74  | 0.168  |
| 628 Grey-backed Camaroptera  | Tail | 42.4 | 4.2  | 38  | 40.0 | 5.5  | 69  | <0.001 |
|                              | Wing | 56.3 | 3.6  | 43  | 53.5 | 2.8  | 74  | <0.001 |
|                              | Mass | 10.0 | 7.7  | 93  | 9.7  | 10.2 | 82  | 0.288  |
| 629 Zitting Cisticola        | Tail | 36.0 | 6.7  | 62  | 36.8 | 4.2  | 44  | 0.500  |
|                              | Wing | 52.9 | 1.6  | 88  | 48.6 | 1.9  | 73  | <0.001 |
|                              | Mass | 8.7  | 1.1  | 36  | 8.3  | 0.6  | 28  | 0.049  |
| 630 Desert Cisticola         | Tail | 39.2 | 2.5  | 27  | 36.6 | 5.7  | 23  | 0.035  |
|                              | Wing | 53.0 | 1.5  | 32  | 49.3 | 1.9  | 25  | <0.001 |
|                              | Mass | 12.1 | 1.0  | 55  | 9.9  | 1.1  | 34  | 0.963  |
| 631 Cloud Cisticola          | Tail | 29.5 | 4.2  | 45  | 29.4 | 2.9  | 29  | 0.982  |
|                              | Wing | 55.5 | 1.3  | 47  | 51.2 | 1.3  | 32  | <0.001 |
|                              | Mass | 9.7  | 0.6  | 55  | 8.6  | 1.0  | 18  | <0.001 |
| 634 Wing-snapping Cisticola  | Tail | 26.4 | 2.8  | 43  | 27.5 | 2.6  | 14  | 0.020  |
|                              | Wing | 50.1 | 1.6  | 55  | 46.6 | 2.4  | 16  | <0.001 |
|                              | Mass | 10.1 | 0.7  | 45  | 8.7  | 0.9  | 24  | <0.001 |
| 635 Pale-crowned Cisticola   | Wing | 54.2 | 1.4  | 42  | 49.7 | 1.7  | 26  | <0.001 |
|                              | Mass | 13.9 | 16.8 | 144 | 15.4 | 19.7 | 142 | 0.259  |
|                              | Tail | 45.9 | 2.6  | 41  | 42.3 | 3.8  | 38  | <0.001 |
| 637 Neddicky                 | Wing | 52.3 | 1.9  | 87  | 48.9 | 2.3  | 105 | <0.001 |
|                              | Mass | 11.8 | 2.4  | 16  | 11.2 | 6.2  | 44  | 0.660  |
|                              |      |      |      |     |      |      |     |        |
| 638 Grey-backed Cisticola    |      |      |      |     |      |      |     |        |
|                              |      |      |      |     |      |      |     |        |
|                              |      |      |      |     |      |      |     |        |



|                                      |      |       |      |      |       |      |      |        |
|--------------------------------------|------|-------|------|------|-------|------|------|--------|
| 639 Wailing Cisticola                | Mass | 16.2  | 2.0  | 48   | 12.0  | 2.0  | 49   | 0.785  |
|                                      | Tail | 56.5  | 4.5  | 16   | 51.1  | 4.9  | 17   | 0.002  |
|                                      | Wing | 63.4  | 4.1  | 44   | 54.3  | 2.8  | 42   | <0.001 |
| 642 Rattling Cisticola               | Mass | 18.3  | 3.2  | 406  | 13.7  | 6.1  | 280  | 0.069  |
|                                      | Tail | 58.0  | 10.8 | 133  | 51.8  | 6.8  | 108  | <0.001 |
|                                      | Wing | 65.4  | 6.3  | 340  | 55.3  | 3.9  | 230  | <0.001 |
| 643 Singing Cisticola                | Mass | 13.1  | 0.9  | 12   | 11.6  | 1.4  | 19   | <0.001 |
| 644 Red-faced Cisticola              | Mass | 15.3  | 1.3  | 58   | 13.7  | 1.6  | 51   | <0.001 |
|                                      | Tail | 58.7  | 4.6  | 19   | 52.8  | 5.3  | 18   | <0.001 |
|                                      | Wing | 56.7  | 2.5  | 42   | 52.8  | 3.0  | 32   | <0.001 |
| 646 Levallant's Cisticola            | Mass | 11.5  | 2.7  | 627  | 10.7  | 2.4  | 530  | 0.686  |
|                                      | Tail | 55.7  | 13.6 | 136  | 52.8  | 7.8  | 157  | 0.006  |
|                                      | Wing | 55.6  | 2.9  | 488  | 51.7  | 2.7  | 415  | <0.001 |
| 647 Croaking Cisticola               | Mass | 25.1  | 2.7  | 36   | 18.1  | 3.1  | 22   | <0.001 |
|                                      | Wing | 72.1  | 3.3  | 35   | 63.9  | 4.5  | 22   | <0.001 |
| 648 Lazy Cisticola                   | Mass | 13.8  | 1.2  | 38   | 12.6  | 2.0  | 47   | 0.144  |
|                                      | Wing | 53.9  | 2.4  | 38   | 50.1  | 2.3  | 44   | <0.001 |
| 649 Tawny-flanked Prinia             | Mass | 9.2   | 0.9  | 206  | 9.1   | 0.9  | 296  | 0.023  |
|                                      | Tail | 65.1  | 8.9  | 48   | 56.1  | 7.7  | 82   | 0.001  |
|                                      | Wing | 51.8  | 2.0  | 139  | 49.4  | 2.1  | 146  | <0.001 |
| 650 Black-chested Prinia             | Mass | 11.8  | 12.8 | 439  | 13.7  | 17.8 | 284  | 0.896  |
|                                      | Tail | 70.4  | 11.7 | 108  | 61.6  | 9.7  | 105  | <0.001 |
|                                      | Wing | 54.2  | 2.6  | 303  | 52.4  | 3.1  | 215  | <0.001 |
| 655 African Dusky Flycatcher         | Mass | 11.5  | 1.1  | 22   | 12.5  | 1.3  | 14   | 0.380  |
| 656 Ashy Flycatcher                  | Mass | 17.4  | 1.4  | 24   | 16.8  | 1.9  | 19   | 0.573  |
|                                      | Wing | 79.3  | 3.0  | 20   | 73.1  | 7.6  | 15   | 0.010  |
| 658 Chestnut-vented Warbler          | Mass | 14.5  | 1.4  | 106  | 15.1  | 3.7  | 236  | 0.350  |
|                                      | Tail | 69.4  | 2.7  | 44   | 67.3  | 8.0  | 110  | 0.258  |
|                                      | Wing | 67.0  | 3.4  | 92   | 65.6  | 3.1  | 211  | <0.001 |
| 661 Marico Flycatcher                | Mass | 22.9  | 4.8  | 64   | 26.2  | 7.1  | 44   | 0.017  |
|                                      | Tail | 76.0  | 6.1  | 52   | 72.1  | 11.1 | 34   | 0.069  |
|                                      | Wing | 87.1  | 2.8  | 56   | 86.5  | 6.1  | 42   | 0.849  |
| 663 Chat Flycatcher                  | Mass | 35.4  | 2.9  | 52   | 33.4  | 2.9  | 35   | 0.013  |
|                                      | Wing | 110.9 | 3.2  | 52   | 106.5 | 2.6  | 35   | <0.001 |
| 664 Southern Black Flycatcher        | Mass | 31.0  | 3.4  | 35   | 31.5  | 3.5  | 29   | 0.347  |
|                                      | Wing | 107.1 | 11.6 | 28   | 106.1 | 4.0  | 23   | 0.022  |
| 665 Fiscal Flycatcher                | Mass | 27.6  | 1.9  | 1208 | 27.1  | 2.0  | 1275 | 0.555  |
|                                      | Tail | 81.2  | 3.1  | 364  | 78.4  | 3.5  | 433  | <0.001 |
|                                      | Wing | 94.4  | 2.8  | 1004 | 91.5  | 2.6  | 1140 | <0.001 |
| 666 African Yellow Warbler           | Mass | 12.1  | 1.0  | 35   | 12.6  | 2.2  | 67   | 0.144  |
|                                      | Tail | 61.2  | 7.8  | 11   | 59.5  | 3.3  | 16   | 0.153  |
|                                      | Wing | 61.4  | 1.6  | 25   | 61.1  | 1.7  | 37   | 0.482  |
| 671 Yellow-throated Woodland Warbler | Mass | 8.3   | 0.4  | 13   | 8.0   | 0.8  | 14   | 0.198  |
| 672 Cape Batis                       | Mass | 12.1  | 0.9  | 684  | 11.8  | 1.0  | 1074 | 0.417  |
|                                      | Tail | 46.3  | 1.8  | 268  | 46.1  | 2.2  | 418  | 0.202  |
|                                      | Wing | 61.6  | 2.0  | 579  | 60.5  | 2.0  | 934  | <0.001 |
| 673 Chinspot Batis                   | Mass | 12.1  | 7.4  | 619  | 11.9  | 7.9  | 823  | 0.912  |
|                                      | Tail | 47.7  | 4.7  | 223  | 47.3  | 4.9  | 311  | 0.453  |
|                                      | Wing | 61.3  | 2.6  | 492  | 60.2  | 3.1  | 650  | <0.001 |
| 674 Pririt Batis                     | Mass | 8.9   | 0.9  | 147  | 8.8   | 1.5  | 196  | 0.497  |
|                                      | Tail | 45.4  | 2.6  | 49   | 45.4  | 2.8  | 51   | 0.824  |
|                                      | Wing | 56.4  | 1.8  | 127  | 55.8  | 1.9  | 157  | 0.004  |
| 676 Woodward's Batis                 | Mass | 12.4  | 1.2  | 24   | 13.3  | 8.2  | 35   | 0.642  |
|                                      | Tail | 36.3  | 1.4  | 12   | 35.1  | 1.9  | 20   | 0.145  |
|                                      | Wing | 61.0  | 2.5  | 22   | 59.7  | 2.2  | 34   | 0.005  |
| 677 Black-throated Wattle-eye        | Mass | 13.8  | 0.8  | 64   | 13.4  | 1.7  | 49   | 0.018  |
|                                      | Tail | 56.6  | 3.2  | 41   | 54.8  | 2.9  | 29   | 0.010  |
|                                      | Wing | 65.5  | 1.7  | 54   | 64.4  | 2.4  | 44   | <0.001 |
| 680 Blue-mantled Crested Flycatcher  | Mass | 10.7  | 0.9  | 144  | 10.6  | 2.0  | 116  | 0.386  |
|                                      | Tail | 77.0  | 8.5  | 59   | 75.4  | 7.5  | 70   | 0.618  |
|                                      | Wing | 67.0  | 2.0  | 122  | 65.3  | 2.2  | 109  | <0.001 |
| 682 African Paradise Flycatcher      | Mass | 15.5  | 1.1  | 735  | 14.8  | 1.3  | 928  | 0.480  |
|                                      | Tail | 219.2 | 77.1 | 239  | 93.2  | 18.6 | 363  | <0.001 |
|                                      | Wing | 82.6  | 2.2  | 610  | 79.1  | 2.6  | 791  | <0.001 |
| 685 African Pied Wagtail             | Mass | 30.0  | 2.8  | 45   | 28.5  | 2.0  | 19   | 0.223  |
|                                      | Wing | 93.9  | 2.9  | 29   | 91.4  | 1.9  | 18   | 0.002  |
| 686 Cape Wagtail                     | Mass | 23.0  | 2.6  | 102  | 22.5  | 2.5  | 125  | 0.406  |

|                                |      |       |      |      |       |      |      |        |
|--------------------------------|------|-------|------|------|-------|------|------|--------|
|                                | Tail | 86.2  | 4.0  | 23   | 85.4  | 5.9  | 38   | 0.49   |
|                                | Wing | 81.7  | 6.6  | 56   | 80.1  | 7.8  | 115  | 0.022  |
| 688 Mountain Wagtail           | Mass | 36.4  | 27.8 | 11   | 27.6  | 19.7 | 16   | 0.507  |
| 689 Yellow Wagtail (pre-split) | Mass | 17.6  | 1.2  | 336  | 16.9  | 1.4  | 749  | <0.001 |
| 692 African Pipit              | Mass | 25.3  | 1.7  | 29   | 24.1  | 1.6  | 32   | 0.016  |
|                                | Tail | 67.7  | 1.8  | 13   | 63.1  | 2.5  | 20   | <0.001 |
|                                | Wing | 91.7  | 1.6  | 18   | 85.9  | 2.8  | 30   | <0.001 |
| 703 Cape Longclaw              | Mass | 50.8  | 4.4  | 120  | 48.0  | 5.0  | 117  | <0.001 |
|                                | Tail | 65.7  | 11.8 | 36   | 63.0  | 8.2  | 39   | 0.262  |
|                                | Wing | 100.5 | 5.0  | 112  | 95.8  | 6.3  | 110  | <0.001 |
| 707 Common Fiscal (pre-split)  | Mass | 43.0  | 3.5  | 2080 | 41.2  | 3.5  | 1494 | <0.001 |
|                                | Tail | 111.2 | 6.0  | 799  | 107.7 | 6.0  | 619  | <0.001 |
|                                | Wing | 99.7  | 2.7  | 1673 | 97.4  | 2.8  | 1254 | <0.001 |
| 708 Red-backed Shrike          | Mass | 28.5  | 5.8  | 539  | 28.2  | 5.7  | 481  | 0.473  |
|                                | Tail | 75.2  | 11.1 | 239  | 74.7  | 10.8 | 217  | 0.852  |
|                                | Wing | 90.4  | 8.6  | 459  | 90.4  | 7.8  | 385  | 0.898  |
| 709 Southern Boubou            | Mass | 59.2  | 6.0  | 348  | 56.6  | 5.8  | 413  | 0.414  |
|                                | Tail | 96.9  | 4.9  | 147  | 94.7  | 4.7  | 178  | <0.001 |
|                                | Wing | 97.5  | 3.5  | 323  | 94.8  | 3.2  | 397  | <0.001 |
| 711 Crimson-breasted Shrike    | Mass | 51.5  | 26.8 | 28   | 57.6  | 46.3 | 42   | 0.484  |
|                                | Tail | 96.8  | 13.8 | 16   | 98.3  | 16.5 | 32   | 0.028  |
|                                | Wing | 104.7 | 15.0 | 21   | 100.3 | 11.9 | 35   | 0.085  |
| 712 Black-backed Puffback      | Mass | 27.8  | 4.6  | 645  | 26.9  | 6.2  | 582  | 0.851  |
|                                | Tail | 68.6  | 5.8  | 268  | 67.7  | 6.9  | 224  | 0.256  |
|                                | Wing | 82.3  | 4.0  | 537  | 79.3  | 4.3  | 473  | <0.001 |
| 714 Brown-crowned Tchagra      | Mass | 33.3  | 4.3  | 27   | 35.0  | 5.9  | 109  | 0.333  |
|                                | Tail | 87.4  | 9.9  | 16   | 88.6  | 14.7 | 74   | 0.757  |
|                                | Wing | 76.3  | 3.8  | 23   | 76.2  | 5.0  | 104  | 0.960  |
| 717 Olive Bushshrike           | Mass | 31.0  | 5.0  | 138  | 31.7  | 7.0  | 61   | 0.403  |
|                                | Tail | 79.7  | 12.6 | 44   | 81.1  | 2.7  | 21   | 0.380  |
|                                | Wing | 83.4  | 6.9  | 123  | 83.2  | 3.0  | 47   | 0.937  |
| 719 Orange-breasted Bushshrike | Mass | 28.3  | 2.0  | 52   | 28.2  | 3.0  | 35   | 0.840  |
|                                | Tail | 86.4  | 12.7 | 31   | 88.3  | 2.8  | 17   | 0.548  |
|                                | Wing | 88.8  | 3.4  | 44   | 87.1  | 2.6  | 30   | 0.003  |
| 721 Gorgeous Bushshrike        | Mass | 40.5  | 6.6  | 43   | 38.8  | 3.5  | 19   | 0.331  |
|                                | Wing | 80.8  | 3.5  | 34   | 76.8  | 11.8 | 13   | 0.070  |
| 722 Bokmakierie                | Mass | 70.3  | 7.3  | 33   | 62.4  | 9.6  | 86   | 0.054  |
|                                | Wing | 101.3 | 3.4  | 29   | 97.0  | 5.4  | 86   | 0.001  |
| 724 Magpie Shrike              | Mass | 84.4  | 7.3  | 40   | 81.4  | 6.9  | 42   | 0.006  |
|                                | Tail | 273.8 | 80.0 | 23   | 242.8 | 53.0 | 19   | 0.156  |
|                                | Wing | 136.4 | 3.4  | 38   | 134.4 | 3.9  | 39   | 0.013  |
| 727 White-crested Helmetshrike | Mass | 33.7  | 3.5  | 31   | 35.5  | 6.8  | 51   | 0.264  |
|                                | Tail | 91.0  | 5.3  | 15   | 91.1  | 6.5  | 24   | 0.748  |
|                                | Wing | 110.1 | 2.6  | 18   | 108.4 | 3.1  | 33   | 0.004  |
| 731 Brubru                     | Mass | 27.8  | 22.9 | 68   | 26.3  | 9.3  | 41   | 0.167  |
|                                | Wing | 85.6  | 4.1  | 57   | 83.7  | 9.7  | 37   | 0.740  |
| 733 Common Starling            | Mass | 78.4  | 7.0  | 113  | 77.9  | 9.5  | 71   | 0.838  |
|                                | Wing | 126.9 | 4.7  | 29   | 125.2 | 3.4  | 32   | 0.138  |
| 734 Common Myna                | Mass | 114.5 | 7.9  | 22   | 101.7 | 8.8  | 22   | <0.001 |
| 735 Wattled Starling           | Mass | 75.8  | 8.0  | 513  | 70.9  | 6.2  | 646  | <0.001 |
|                                | Tail | 68.3  | 3.1  | 87   | 66.5  | 3.1  | 67   | <0.001 |
|                                | Wing | 120.1 | 6.8  | 369  | 116.7 | 7.2  | 409  | <0.001 |
| 736 Violet-backed Starling     | Mass | 40.8  | 6.6  | 377  | 42.2  | 6.8  | 253  | 0.875  |
|                                | Tail | 61.4  | 4.3  | 150  | 58.4  | 2.8  | 102  | <0.001 |
|                                | Wing | 106.3 | 4.2  | 305  | 101.2 | 4.8  | 212  | <0.001 |
| 737 Cape Starling              | Mass | 87.0  | 11.7 | 102  | 77.1  | 10.2 | 144  | <0.001 |
|                                | Tail | 86.8  | 5.4  | 45   | 80.6  | 10.8 | 71   | <0.001 |
|                                | Wing | 132.3 | 8.5  | 96   | 125.0 | 9.6  | 132  | <0.001 |
| 740 Black-bellied Starling     | Mass | 62.7  | 6.3  | 61   | 59.1  | 7.7  | 86   | <0.001 |
|                                | Wing | 110.8 | 3.5  | 38   | 106.3 | 7.0  | 63   | <0.001 |
| 742 Meves's Starling           | Mass | 82.1  | 7.3  | 61   | 69.2  | 5.6  | 54   | 0.074  |
|                                | Tail | 197.5 | 19.0 | 37   | 182.8 | 15.1 | 30   | <0.001 |
|                                | Wing | 149.9 | 5.9  | 62   | 137.8 | 5.9  | 47   | <0.001 |
| 745 Red-winged Starling        | Mass | 136.6 | 10.8 | 776  | 128.3 | 10.0 | 775  | <0.001 |
|                                | Tail | 126.9 | 8.7  | 292  | 122.7 | 7.0  | 281  | <0.001 |
|                                | Wing | 147.8 | 6.6  | 589  | 142.8 | 6.7  | 582  | <0.001 |
| 746 Pied Starling              | Mass | 109.8 | 6.1  | 23   | 105.1 | 13.7 | 31   | 0.854  |

|                                                |      |       |      |      |       |      |      |        |
|------------------------------------------------|------|-------|------|------|-------|------|------|--------|
| 748 Red-billed Oxpecker                        | Wing | 155.2 | 19.3 | 20   | 152.0 | 5.2  | 26   | 0.030  |
|                                                | Mass | 49.2  | 3.4  | 140  | 47.5  | 3.5  | 134  | <0.001 |
|                                                | Tail | 95.4  | 4.5  | 89   | 94.1  | 3.5  | 101  | 0.022  |
| 749 Cape Sugarbird                             | Wing | 121.6 | 3.3  | 98   | 119.7 | 3.1  | 110  | <0.001 |
|                                                | Mass | 36.8  | 3.4  | 3471 | 32.2  | 3.4  | 3670 | <0.001 |
|                                                | Tail | 262.6 | 61.3 | 1104 | 113.6 | 20.5 | 1044 | <0.001 |
| 750 Gurney's Sugarbird                         | Wing | 93.2  | 3.9  | 2176 | 83.0  | 3.6  | 2290 | <0.001 |
|                                                | Mass | 37.2  | 3.8  | 494  | 32.4  | 5.3  | 414  | <0.001 |
|                                                | Tail | 136.1 | 33.9 | 251  | 105.9 | 14.4 | 239  | <0.001 |
| 751 Malachite Sunbird                          | Wing | 93.2  | 5.7  | 456  | 86.4  | 3.5  | 351  | <0.001 |
|                                                | Mass | 18.4  | 3.1  | 2468 | 15.2  | 4.2  | 1596 | <0.001 |
|                                                | Tail | 79.8  | 33.9 | 930  | 49.8  | 4.3  | 582  | <0.001 |
| 752 Bronzy Sunbird                             | Wing | 78.5  | 4.2  | 1727 | 69.9  | 3.6  | 1153 | <0.001 |
|                                                | Mass | 16.3  | 1.1  | 116  | 14.6  | 1.0  | 92   | <0.001 |
| 753 Orange-breasted Sunbird                    | Mass | 9.7   | 0.8  | 1807 | 8.6   | 0.8  | 827  | <0.001 |
|                                                | Tail | 71.0  | 11.7 | 602  | 44.4  | 3.7  | 305  | <0.001 |
|                                                | Wing | 54.9  | 2.0  | 1388 | 50.5  | 1.7  | 671  | <0.001 |
| 754 Copper Sunbird                             | Mass | 9.6   | 0.7  | 132  | 8.8   | 0.6  | 101  | 0.020  |
|                                                | Wing | 62.3  | 1.9  | 94   | 57.7  | 1.4  | 67   | <0.001 |
| 755 Marico Sunbird                             | Mass | 12.0  | 2.6  | 589  | 11.0  | 5.2  | 341  | 0.001  |
|                                                | Tail | 48.0  | 3.4  | 212  | 42.8  | 4.1  | 113  | <0.001 |
|                                                | Wing | 67.1  | 2.6  | 483  | 61.7  | 3.6  | 290  | <0.001 |
| 756 Purple-banded Sunbird                      | Mass | 7.7   | 0.9  | 126  | 7.2   | 0.7  | 80   | <0.001 |
|                                                | Tail | 42.1  | 2.2  | 22   | 34.3  | 1.9  | 11   | <0.001 |
|                                                | Wing | 57.5  | 1.6  | 108  | 53.2  | 1.4  | 65   | <0.001 |
| 758 Greater Double-collared Sunbird            | Mass | 12.3  | 1.2  | 1409 | 10.5  | 1.0  | 731  | 0.125  |
|                                                | Tail | 52.7  | 2.8  | 587  | 45.7  | 2.7  | 296  | <0.001 |
|                                                | Wing | 65.6  | 2.6  | 1178 | 60.3  | 2.5  | 646  | <0.001 |
| 759 Miombo Double-collared Sunbird (pre-split) | Mass | 10.1  | 0.7  | 361  | 8.8   | 0.6  | 345  | <0.001 |
|                                                | Tail | 43.9  | 2.3  | 13   | 39.4  | 1.8  | 12   | <0.001 |
|                                                | Wing | 62.4  | 1.8  | 53   | 57.9  | 2.1  | 37   | <0.001 |
| 760 Southern Double-collared Sunbird           | Mass | 8.2   | 0.7  | 4352 | 7.4   | 0.7  | 3105 | 0.173  |
|                                                | Tail | 45.0  | 2.5  | 1475 | 39.2  | 2.5  | 1086 | <0.001 |
|                                                | Wing | 55.5  | 1.9  | 3033 | 51.3  | 1.9  | 2235 | <0.001 |
| 762 Variable Sunbird                           | Mass | 7.5   | 0.6  | 881  | 7.0   | 0.6  | 654  | <0.001 |
|                                                | Tail | 37.7  | 2.2  | 57   | 34.2  | 2.4  | 43   | <0.001 |
|                                                | Wing | 52.3  | 1.6  | 106  | 49.0  | 5.2  | 72   | <0.001 |
| 763 White-bellied Sunbird                      | Mass | 8.6   | 4.0  | 2156 | 7.9   | 5.1  | 1397 | 0.085  |
|                                                | Tail | 40.8  | 2.8  | 462  | 36.5  | 3.2  | 315  | <0.001 |
|                                                | Wing | 56.6  | 2.3  | 1777 | 52.7  | 2.3  | 1213 | <0.001 |
| 764 Dusky Sunbird                              | Mass | 8.0   | 0.8  | 506  | 7.0   | 1.0  | 247  | 0.975  |
|                                                | Tail | 40.7  | 2.4  | 309  | 35.7  | 2.4  | 137  | <0.001 |
|                                                | Wing | 57.7  | 4.1  | 462  | 52.5  | 2.4  | 239  | <0.001 |
| 765 Grey Sunbird                               | Mass | 12.0  | 1.3  | 133  | 11.2  | 1.1  | 94   | <0.001 |
|                                                | Tail | 51.1  | 4.4  | 43   | 45.2  | 3.7  | 33   | <0.001 |
|                                                | Wing | 63.9  | 2.9  | 117  | 60.4  | 2.2  | 86   | <0.001 |
| 766 Olive Sunbird                              | Mass | 12.1  | 1.5  | 1600 | 10.8  | 2.1  | 1177 | 0.910  |
|                                                | Tail | 59.9  | 4.8  | 316  | 51.1  | 4.4  | 226  | <0.001 |
|                                                | Wing | 66.4  | 4.2  | 969  | 60.8  | 3.1  | 728  | <0.001 |
| 771 Collared Sunbird                           | Mass | 7.6   | 0.6  | 128  | 7.1   | 0.5  | 70   | 0.544  |
|                                                | Tail | 38.9  | 1.3  | 35   | 35.4  | 0.6  | 12   | <0.001 |
|                                                | Wing | 53.2  | 1.9  | 109  | 50.6  | 2.0  | 65   | <0.001 |
| 772 Amethyst Sunbird                           | Mass | 14.5  | 1.6  | 1966 | 13.4  | 1.5  | 1522 | 0.360  |
|                                                | Tail | 49.5  | 2.3  | 812  | 44.4  | 2.2  | 571  | <0.001 |
|                                                | Wing | 72.4  | 2.0  | 1506 | 67.2  | 2.0  | 1224 | <0.001 |
| 774 Scarlet-chested Sunbird                    | Mass | 14.4  | 1.2  | 450  | 12.7  | 1.2  | 430  | <0.001 |
|                                                | Tail | 51.4  | 3.8  | 37   | 46.5  | 2.7  | 29   | <0.001 |
|                                                | Wing | 73.4  | 2.4  | 391  | 67.6  | 2.0  | 403  | <0.001 |
| 777 African Yellow White-eye                   | Mass | 10.0  | 0.9  | 127  | 10.2  | 1.0  | 145  | 0.006  |
| 779 Red-billed Buffalo Weaver                  | Mass | 82.5  | 9.2  | 272  | 72.3  | 7.1  | 193  | 0.119  |
|                                                | Tail | 104.4 | 8.7  | 146  | 97.6  | 10.4 | 103  | <0.001 |
|                                                | Wing | 119.8 | 7.6  | 247  | 113.8 | 3.8  | 163  | <0.001 |
| 780 White-browed Sparrow-Weaver                | Mass | 44.9  | 3.4  | 5399 | 42.3  | 3.2  | 4338 | 0.054  |
|                                                | Tail | 42.7  | 28.8 | 941  | 48.2  | 25.3 | 845  | <0.001 |
|                                                | Wing | 103.6 | 3.3  | 4872 | 100.7 | 3.0  | 3974 | <0.001 |
| 783 Sociable Weaver                            | Mass | 27.3  | 1.6  | 1083 | 27.5  | 1.7  | 1043 | 0.012  |
|                                                | Tail | 46.0  | 1.6  | 171  | 44.8  | 4.0  | 161  | 0.230  |

|                                    |      |      |      |       |      |      |       |        |
|------------------------------------|------|------|------|-------|------|------|-------|--------|
| 784 House Sparrow                  | Wing | 76.8 | 2.0  | 490   | 76.1 | 2.2  | 537   | 0.022  |
|                                    | Mass | 24.8 | 1.9  | 4470  | 24.6 | 2.1  | 3375  | 0.877  |
|                                    | Tail | 55.8 | 3.0  | 861   | 53.2 | 3.6  | 605   | <0.001 |
| 785 Great Sparrow                  | Wing | 75.6 | 2.2  | 3113  | 72.8 | 2.3  | 2327  | <0.001 |
|                                    | Mass | 31.3 | 5.6  | 695   | 30.9 | 5.8  | 581   | 0.936  |
|                                    | Tail | 60.3 | 6.4  | 120   | 59.0 | 7.9  | 99    | 0.183  |
| 786 Cape Sparrow                   | Wing | 82.6 | 6.0  | 616   | 80.1 | 6.0  | 513   | <0.001 |
|                                    | Mass | 26.5 | 2.4  | 12114 | 26.1 | 2.4  | 11440 | 0.893  |
|                                    | Tail | 60.6 | 3.0  | 3644  | 58.9 | 3.1  | 3355  | <0.001 |
| 788 Yellow-throated Petronia       | Wing | 78.5 | 2.9  | 8661  | 76.5 | 2.9  | 8350  | <0.001 |
|                                    | Mass | 26.2 | 5.1  | 33    | 25.8 | 2.8  | 21    | 0.133  |
|                                    | Wing | 88.4 | 14.8 | 15    | 87.0 | 3.8  | 13    | 0.020  |
| 789 Scaly-feathered Weaver         | Mass | 12.9 | 7.8  | 125   | 13.2 | 11.2 | 232   | 0.175  |
|                                    | Tail | 39.9 | 1.5  | 64    | 39.0 | 1.9  | 140   | 0.001  |
|                                    | Wing | 57.9 | 1.7  | 85    | 56.5 | 1.9  | 201   | <0.001 |
| 790 Dark-backed Weaver             | Mass | 37.6 | 3.2  | 44    | 41.9 | 39.9 | 50    | 0.492  |
|                                    | Tail | 58.8 | 2.8  | 25    | 57.8 | 6.6  | 31    | 0.486  |
|                                    | Wing | 86.5 | 8.3  | 39    | 84.2 | 8.7  | 44    | 0.221  |
| 791 Spectacled Weaver              | Mass | 28.8 | 3.8  | 1548  | 27.9 | 6.8  | 1300  | 0.147  |
|                                    | Tail | 62.7 | 4.9  | 642   | 62.1 | 3.5  | 505   | 0.020  |
|                                    | Wing | 76.1 | 5.2  | 1301  | 73.9 | 5.4  | 1049  | <0.001 |
| 792 Lesser Masked Weaver           | Mass | 22.0 | 3.9  | 1305  | 20.2 | 3.5  | 1394  | 0.852  |
|                                    | Tail | 48.6 | 6.0  | 436   | 47.4 | 5.0  | 508   | <0.001 |
|                                    | Wing | 72.3 | 4.0  | 977   | 69.7 | 3.6  | 1141  | <0.001 |
| 793 Red-headed Weaver              | Mass | 22.8 | 1.7  | 320   | 21.3 | 4.1  | 370   | 0.823  |
|                                    | Tail | 50.3 | 5.8  | 221   | 49.0 | 6.0  | 230   | 0.014  |
|                                    | Wing | 82.7 | 3.8  | 254   | 78.1 | 5.4  | 306   | <0.001 |
| 796 Chestnut Weaver                | Mass | 35.7 | 12.7 | 1949  | 30.7 | 8.4  | 1810  | <0.001 |
|                                    | Tail | 54.7 | 2.4  | 227   | 50.4 | 2.4  | 211   | <0.001 |
|                                    | Wing | 77.8 | 12.6 | 2011  | 76.4 | 5.8  | 1826  | <0.001 |
| 797 Village Weaver                 | Mass | 40.2 | 4.6  | 6088  | 34.6 | 4.7  | 4522  | <0.001 |
|                                    | Tail | 55.2 | 4.6  | 2242  | 51.6 | 3.6  | 1562  | <0.001 |
|                                    | Wing | 87.6 | 3.7  | 4812  | 81.9 | 3.7  | 3809  | <0.001 |
| 799 Cape Weaver                    | Mass | 47.4 | 3.5  | 9658  | 40.6 | 3.4  | 9794  | <0.001 |
|                                    | Tail | 58.5 | 2.3  | 3812  | 54.8 | 2.3  | 3329  | <0.001 |
|                                    | Wing | 90.9 | 2.2  | 7661  | 85.1 | 2.3  | 7956  | <0.001 |
| 800 Eastern Golden Weaver          | Mass | 35.0 | 15.1 | 1849  | 29.3 | 13.0 | 1537  | 0.351  |
|                                    | Tail | 56.0 | 4.2  | 858   | 51.7 | 4.6  | 852   | <0.001 |
|                                    | Wing | 80.5 | 7.3  | 1408  | 74.5 | 7.4  | 1469  | <0.001 |
| 801 Holub's Golden Weaver          | Mass | 42.6 | 5.1  | 281   | 38.9 | 6.7  | 115   | <0.001 |
|                                    | Tail | 71.7 | 4.2  | 84    | 69.5 | 5.1  | 39    | 0.007  |
|                                    | Wing | 91.1 | 4.6  | 213   | 87.6 | 4.6  | 84    | <0.001 |
| 802 Southern Brown-throated Weaver | Mass | 29.1 | 2.9  | 323   | 23.8 | 4.2  | 322   | <0.001 |
|                                    | Tail | 56.8 | 2.9  | 77    | 50.6 | 2.4  | 66    | <0.001 |
|                                    | Wing | 79.6 | 3.0  | 227   | 71.9 | 4.4  | 221   | <0.001 |
| 803 Southern Masked Weaver         | Mass | 29.8 | 4.3  | 38853 | 25.8 | 4.2  | 39206 | <0.001 |
|                                    | Tail | 55.9 | 4.8  | 13594 | 52.4 | 4.3  | 10861 | <0.001 |
|                                    | Wing | 80.3 | 5.0  | 32488 | 75.0 | 4.0  | 30881 | <0.001 |
| 804 Thick-billed Weaver            | Mass | 48.8 | 5.0  | 1318  | 40.2 | 5.3  | 2046  | 0.001  |
|                                    | Tail | 71.0 | 6.4  | 594   | 66.5 | 5.5  | 980   | <0.001 |
|                                    | Wing | 95.4 | 5.5  | 1098  | 87.8 | 5.3  | 1790  | <0.001 |
| 805 Red-billed Quelea              | Mass | 19.4 | 3.0  | 12456 | 18.5 | 3.6  | 9367  | 0.572  |
|                                    | Tail | 37.9 | 3.3  | 2807  | 37.1 | 3.3  | 2614  | <0.001 |
|                                    | Wing | 65.9 | 5.4  | 10730 | 64.4 | 4.3  | 7450  | <0.001 |
| 806 Red-headed Quelea              | Mass | 19.9 | 1.8  | 258   | 17.8 | 1.7  | 403   | <0.001 |
|                                    | Tail | 34.9 | 1.6  | 43    | 33.5 | 1.9  | 35    | 0.001  |
|                                    | Wing | 65.4 | 1.9  | 156   | 62.8 | 2.5  | 158   | <0.001 |
| 808 Southern Red Bishop            | Mass | 26.2 | 3.3  | 27327 | 22.2 | 3.4  | 32368 | <0.001 |
|                                    | Tail | 42.6 | 3.5  | 8618  | 39.0 | 3.6  | 9521  | <0.001 |
|                                    | Wing | 74.7 | 4.7  | 21527 | 69.2 | 3.9  | 23664 | <0.001 |
| 809 Black-winged Red Bishop        | Mass | 22.9 | 2.3  | 60    | 20.0 | 2.5  | 75    | <0.001 |
|                                    | Tail | 48.4 | 3.6  | 21    | 41.5 | 4.4  | 37    | <0.001 |
|                                    | Wing | 77.3 | 3.8  | 42    | 68.8 | 4.5  | 59    | <0.001 |
| 810 Yellow Bishop                  | Mass | 32.1 | 5.8  | 1554  | 27.1 | 4.3  | 1924  | <0.001 |
|                                    | Tail | 56.7 | 4.4  | 562   | 49.1 | 3.2  | 783   | <0.001 |
|                                    | Wing | 80.9 | 5.3  | 1157  | 73.9 | 4.3  | 1443  | <0.001 |
| 812 Yellow-crowned Bishop          | Mass | 16.8 | 6.9  | 995   | 16.4 | 10.2 | 1084  | 0.015  |

|                             |      |       |       |       |      |      |       |        |
|-----------------------------|------|-------|-------|-------|------|------|-------|--------|
| 813 Red-collared Widowbird  | Tail | 36.8  | 1.7   | 304   | 35.1 | 1.9  | 310   | <0.001 |
|                             | Wing | 63.7  | 1.9   | 722   | 62.0 | 2.0  | 695   | <0.001 |
|                             | Mass | 21.6  | 2.3   | 1828  | 18.6 | 2.4  | 2100  | <0.001 |
| 814 White-winged Widowbird  | Tail | 130.8 | 80.2  | 479   | 45.4 | 9.3  | 442   | <0.001 |
|                             | Wing | 75.4  | 3.3   | 1274  | 67.1 | 3.6  | 1504  | <0.001 |
|                             | Mass | 21.8  | 2.2   | 2816  | 18.8 | 2.3  | 2676  | <0.001 |
| 816 Fan-tailed Widowbird    | Tail | 65.4  | 19.6  | 732   | 43.7 | 6.2  | 549   | <0.001 |
|                             | Wing | 74.4  | 7.7   | 2007  | 66.9 | 4.6  | 1721  | <0.001 |
|                             | Mass | 27.6  | 2.8   | 2922  | 21.5 | 2.8  | 2287  | <0.001 |
| 818 Long-tailed Widowbird   | Tail | 67.6  | 10.8  | 1108  | 46.5 | 5.4  | 967   | <0.001 |
|                             | Wing | 87.7  | 6.5   | 2446  | 71.9 | 4.8  | 1901  | <0.001 |
|                             | Mass | 38.5  | 5.3   | 341   | 30.9 | 4.9  | 480   | <0.001 |
| 820 Red-headed Finch        | Tail | 208.5 | 158.2 | 84    | 60.5 | 8.7  | 155   | <0.001 |
|                             | Wing | 124.8 | 18.7  | 272   | 95.2 | 9.2  | 410   | <0.001 |
|                             | Mass | 22.7  | 1.8   | 14222 | 22.5 | 1.9  | 11338 | 0.009  |
| 821 Cut-throat Finch        | Tail | 50.2  | 2.4   | 5254  | 48.5 | 2.4  | 4215  | <0.001 |
|                             | Wing | 73.0  | 2.1   | 12986 | 72.2 | 2.2  | 10702 | <0.001 |
|                             | Mass | 17.4  | 1.6   | 698   | 17.3 | 1.6  | 606   | 0.132  |
| 823 Bronze Mannikin         | Tail | 40.4  | 2.4   | 339   | 39.5 | 2.3  | 324   | <0.001 |
|                             | Wing | 66.6  | 2.1   | 442   | 66.0 | 1.9  | 390   | <0.001 |
|                             | Mass | 9.8   | 1.7   | 322   | 9.8  | 1.0  | 243   | 0.879  |
| 824 Red-backed Mannikin     | Tail | 32.7  | 2.9   | 64    | 32.2 | 2.6  | 52    | 0.119  |
|                             | Wing | 48.5  | 4.7   | 157   | 48.9 | 1.4  | 76    | 0.829  |
|                             | Mass | 9.5   | 0.7   | 33    | 9.8  | 0.9  | 51    | 0.126  |
| 825 Sweet Waxbill           | Mass | 9.1   | 8.2   | 143   | 9.6  | 9.6  | 249   | 0.659  |
| 826 Yellow-bellied Waxbill  | Tail | 37.1  | 1.4   | 43    | 37.4 | 1.4  | 98    | 0.384  |
|                             | Wing | 48.1  | 1.2   | 109   | 47.9 | 1.2  | 183   | 0.180  |
|                             | Mass | 6.9   | 0.7   | 17    | 7.3  | 0.7  | 52    | 0.225  |
| 827 Green Twinspot          | Mass | 10.0  | 3.1   | 159   | 9.8  | 1.3  | 126   | 0.294  |
| 828 Red-faced Crimsonwing   | Tail | 33.8  | 3.8   | 72    | 34.2 | 2.0  | 63    | 0.567  |
|                             | Wing | 51.6  | 3.9   | 124   | 51.9 | 1.8  | 95    | 0.390  |
|                             | Mass | 13.5  | 0.9   | 39    | 13.9 | 1.2  | 36    | 0.015  |
| 830 Green-winged Pytilia    | Mass | 15.2  | 3.6   | 4898  | 15.0 | 3.7  | 4115  | 0.727  |
| 831 Pink-throated Twinspot  | Tail | 49.8  | 5.0   | 1450  | 49.1 | 4.8  | 1163  | <0.001 |
|                             | Wing | 58.6  | 3.3   | 4097  | 57.9 | 3.6  | 3357  | <0.001 |
|                             | Mass | 13.0  | 0.8   | 104   | 13.0 | 1.0  | 95    | 0.414  |
| 832 Red-throated Twinspot   | Tail | 53.5  | 2.7   | 55    | 52.5 | 1.6  | 43    | 0.036  |
|                             | Wing | 54.5  | 1.6   | 99    | 53.8 | 1.4  | 89    | 0.001  |
|                             | Mass | 15.4  | 1.0   | 98    | 15.1 | 1.1  | 91    | 0.158  |
| 833 African Firefinch       | Wing | 56.2  | 2.1   | 34    | 55.6 | 1.7  | 34    | 0.277  |
|                             | Mass | 10.3  | 5.1   | 1150  | 10.1 | 4.1  | 1044  | 0.329  |
|                             | Tail | 44.7  | 2.7   | 267   | 44.0 | 2.3  | 225   | <0.001 |
| 835 Jameson's Firefinch     | Wing | 48.7  | 3.0   | 849   | 48.1 | 2.7  | 772   | <0.001 |
|                             | Mass | 9.6   | 5.1   | 1827  | 9.6  | 4.9  | 1804  | 0.202  |
|                             | Tail | 43.1  | 4.5   | 501   | 42.2 | 3.9  | 490   | <0.001 |
| 836 Brown Firefinch         | Wing | 47.9  | 2.0   | 1313  | 47.5 | 2.6  | 1249  | <0.001 |
|                             | Mass | 10.5  | 1.7   | 87    | 10.6 | 1.8  | 46    | 0.154  |
|                             | Wing | 49.7  | 6.6   | 69    | 49.4 | 8.2  | 28    | 0.917  |
| 837 Red-billed Firefinch    | Mass | 8.7   | 5.5   | 2200  | 8.9  | 5.6  | 2425  | 0.235  |
|                             | Tail | 36.9  | 3.5   | 627   | 35.9 | 3.3  | 649   | <0.001 |
|                             | Wing | 48.9  | 2.6   | 1637  | 48.1 | 2.8  | 1805  | <0.001 |
| 838 Orange-breasted Waxbill | Mass | 8.1   | 1.7   | 1207  | 8.2  | 2.0  | 931   | 0.892  |
|                             | Tail | 35.7  | 2.0   | 135   | 34.7 | 2.3  | 92    | 0.002  |
|                             | Wing | 46.1  | 1.3   | 502   | 45.8 | 1.3  | 366   | <0.001 |
| 839 Blue Waxbill            | Mass | 9.9   | 0.7   | 7645  | 9.9  | 0.7  | 5585  | 0.030  |
|                             | Tail | 54.2  | 3.1   | 1505  | 51.9 | 3.2  | 1430  | <0.001 |
|                             | Wing | 52.6  | 1.6   | 5269  | 52.2 | 1.6  | 4078  | <0.001 |
| 840 Violet-eared Waxbill    | Mass | 11.4  | 3.2   | 2645  | 11.3 | 3.9  | 2459  | 0.262  |
|                             | Tail | 71.9  | 8.6   | 511   | 67.4 | 8.5  | 412   | <0.001 |
|                             | Wing | 57.3  | 2.9   | 1938  | 56.4 | 3.0  | 1759  | <0.001 |
| 841 Black-faced Waxbill     | Mass | 10.1  | 6.8   | 449   | 10.7 | 8.4  | 316   | 0.076  |
|                             | Tail | 60.4  | 5.4   | 154   | 59.5 | 5.6  | 89    | 0.076  |
|                             | Wing | 51.7  | 10.4  | 342   | 51.6 | 10.0 | 256   | 0.056  |
| 843 Common Waxbill          | Mass | 9.1   | 0.8   | 2843  | 9.0  | 0.8  | 1839  | 0.957  |
|                             | Tail | 55.5  | 3.5   | 1228  | 53.4 | 3.4  | 826   | <0.001 |
|                             | Wing | 50.6  | 1.7   | 2398  | 49.9 | 1.8  | 1590  | <0.001 |
| 844 Quailfinch              | Mass | 11.4  | 0.9   | 427   | 11.4 | 2.4  | 372   | 0.845  |

|                                 |      |       |       |      |       |      |      |        |
|---------------------------------|------|-------|-------|------|-------|------|------|--------|
|                                 | Tail | 28.9  | 1.7   | 87   | 28.6  | 1.2  | 21   | 0.003  |
|                                 | Wing | 55.3  | 1.7   | 244  | 54.7  | 1.8  | 204  | <0.001 |
| 846 Pin-tailed Whydah           | Mass | 15.6  | 1.2   | 1014 | 14.6  | 1.2  | 1108 | 0.007  |
|                                 | Tail | 103.2 | 77.0  | 338  | 49.5  | 7.8  | 298  | <0.001 |
|                                 | Wing | 72.6  | 2.6   | 804  | 69.2  | 2.4  | 824  | <0.001 |
| 847 Shaft-tailed Whydah         | Mass | 15.9  | 4.4   | 352  | 15.0  | 5.3  | 350  | 0.102  |
|                                 | Tail | 179.0 | 75.3  | 106  | 42.7  | 20.1 | 92   | <0.001 |
|                                 | Wing | 72.9  | 1.8   | 294  | 70.2  | 2.2  | 306  | <0.001 |
| 849 Dusky Indigobird            | Mass | 15.0  | 1.3   | 366  | 13.9  | 1.9  | 261  | 0.617  |
|                                 | Tail | 41.6  | 2.1   | 55   | 40.2  | 2.0  | 46   | 0.001  |
|                                 | Wing | 69.6  | 1.5   | 256  | 67.5  | 1.9  | 160  | <0.001 |
| 850 Purple Indigobird           | Mass | 13.7  | 1.2   | 30   | 13.3  | 1.9  | 26   | 0.183  |
| 851 Village Indigobird          | Mass | 13.5  | 1.5   | 90   | 13.6  | 5.2  | 117  | 0.706  |
|                                 | Tail | 40.6  | 4.3   | 49   | 38.8  | 3.6  | 58   | 0.399  |
|                                 | Wing | 67.4  | 2.3   | 82   | 65.7  | 2.2  | 95   | <0.001 |
| 852 Long-tailed Paradise Whydah | Mass | 23.0  | 2.1   | 643  | 20.6  | 2.1  | 618  | <0.001 |
|                                 | Tail | 196.0 | 88.7  | 132  | 67.3  | 41.8 | 12   | 0.001  |
|                                 | Wing | 81.1  | 1.7   | 601  | 78.0  | 1.7  | 607  | <0.001 |
| 854 Cuckoo-finch                | Mass | 21.5  | 1.4   | 144  | 21.0  | 1.7  | 110  | 0.011  |
| 855 Cape Siskin                 | Mass | 13.1  | 0.9   | 200  | 13.0  | 1.0  | 159  | 0.334  |
|                                 | Tail | 51.8  | 1.9   | 106  | 51.0  | 1.7  | 83   | 0.002  |
|                                 | Wing | 70.2  | 1.7   | 174  | 69.1  | 2.0  | 150  | <0.001 |
| 856 Drakensberg Siskin          | Mass | 16.7  | 1.1   | 83   | 17.1  | 1.2  | 67   | 0.005  |
|                                 | Tail | 57.3  | 2.1   | 71   | 56.4  | 1.7  | 57   | 0.024  |
|                                 | Wing | 77.0  | 1.7   | 83   | 75.7  | 1.4  | 66   | <0.001 |
| 857 Cape Canary                 | Mass | 15.3  | 1.4   | 624  | 15.3  | 1.9  | 360  | 0.079  |
|                                 | Tail | 54.6  | 3.1   | 139  | 53.2  | 2.7  | 102  | <0.001 |
|                                 | Wing | 77.9  | 3.1   | 386  | 75.4  | 3.4  | 219  | <0.001 |
| 858 Forest Canary               | Mass | 15.4  | 1.1   | 114  | 15.7  | 1.2  | 107  | 0.109  |
|                                 | Wing | 68.1  | 2.1   | 93   | 67.4  | 2.1  | 81   | 0.007  |
| 859 Yellow-fronted Canary       | Mass | 13.0  | 1.9   | 915  | 13.0  | 1.6  | 434  | 0.411  |
|                                 | Tail | 45.0  | 3.5   | 119  | 44.4  | 2.5  | 76   | 0.212  |
|                                 | Wing | 68.4  | 4.0   | 342  | 67.7  | 4.7  | 178  | 0.065  |
| 860 Black-throated Canary       | Mass | 11.7  | 1.6   | 357  | 11.7  | 2.0  | 474  | 0.268  |
|                                 | Tail | 44.9  | 3.1   | 111  | 44.5  | 2.7  | 159  | 0.041  |
|                                 | Wing | 68.3  | 2.6   | 243  | 67.5  | 2.1  | 290  | <0.001 |
| 861 Black-headed Canary         | Mass | 12.6  | 1.3   | 45   | 12.2  | 2.2  | 60   | 0.171  |
|                                 | Tail | 46.1  | 1.1   | 13   | 45.4  | 1.7  | 12   | 0.110  |
|                                 | Wing | 67.5  | 2.1   | 42   | 65.5  | 3.4  | 45   | 0.001  |
| 863 Brimstone Canary            | Mass | 24.6  | 5.8   | 281  | 24.5  | 4.1  | 146  | 0.980  |
|                                 | Tail | 62.7  | 3.2   | 41   | 61.8  | 3.3  | 24   | 0.289  |
|                                 | Wing | 81.7  | 4.5   | 125  | 80.6  | 2.5  | 69   | 0.110  |
| 865 White-throated Canary       | Mass | 24.0  | 2.3   | 127  | 24.3  | 4.1  | 285  | 0.936  |
|                                 | Tail | 56.0  | 2.6   | 97   | 55.3  | 2.8  | 224  | <0.001 |
|                                 | Wing | 83.3  | 3.1   | 116  | 80.7  | 3.2  | 252  | <0.001 |
| 866 Yellow Canary               | Mass | 18.0  | 6.8   | 2357 | 17.7  | 7.5  | 2081 | 0.001  |
|                                 | Tail | 56.2  | 4.3   | 412  | 54.5  | 4.9  | 340  | <0.001 |
|                                 | Wing | 71.4  | 6.9   | 1758 | 69.4  | 5.7  | 1532 | <0.001 |
| 867 Streaky-headed Seedeater    | Mass | 18.1  | 1.9   | 102  | 19.2  | 2.3  | 89   | 0.017  |
|                                 | Wing | 80.0  | 2.4   | 27   | 77.8  | 3.1  | 50   | 0.015  |
| 871 Lark-like Bunting           | Mass | 14.7  | 1.3   | 119  | 15.3  | 2.2  | 126  | 0.037  |
|                                 | Tail | 60.1  | 2.8   | 83   | 58.0  | 2.4  | 53   | <0.001 |
|                                 | Wing | 74.9  | 4.5   | 104  | 73.8  | 2.9  | 122  | <0.001 |
| 872 Cinnamon-breasted Bunting   | Mass | 15.4  | 1.8   | 780  | 15.3  | 5.0  | 898  | 0.869  |
|                                 | Tail | 63.2  | 5.7   | 115  | 60.4  | 7.7  | 137  | <0.001 |
|                                 | Wing | 77.3  | 7.1   | 647  | 74.9  | 5.6  | 740  | <0.001 |
| 873 Cape Bunting                | Mass | 20.6  | 1.9   | 211  | 19.9  | 1.9  | 298  | 0.153  |
|                                 | Tail | 66.5  | 4.6   | 42   | 64.1  | 3.0  | 60   | 0.071  |
|                                 | Wing | 78.3  | 4.1   | 150  | 72.8  | 3.4  | 230  | <0.001 |
| 874 Golden-breasted Bunting     | Mass | 19.4  | 5.9   | 1088 | 18.7  | 3.9  | 671  | 0.373  |
|                                 | Tail | 71.2  | 7.7   | 254  | 69.1  | 6.0  | 143  | <0.001 |
|                                 | Wing | 82.9  | 5.3   | 848  | 80.0  | 3.3  | 507  | <0.001 |
| 903 Black Tern                  | Mass | 67.4  | 4.7   | 77   | 65.8  | 5.0  | 68   | 0.004  |
| 977 Tropical Boubou             | Mass | 50.2  | 4.9   | 19   | 48.8  | 7.3  | 36   | 0.257  |
|                                 | Wing | 98.6  | 3.8   | 12   | 93.5  | 8.2  | 20   | 0.040  |
| 1035 Northern Black Korhaan     | Mass | 740.5 | 141.6 | 62   | 754.3 | 65.0 | 45   | 0.772  |
|                                 | Wing | 276.3 | 8.0   | 55   | 268.1 | 8.2  | 37   | <0.001 |

|                                   |      |       |      |     |       |      |      |        |
|-----------------------------------|------|-------|------|-----|-------|------|------|--------|
| 1038 Drakensberg Rockjumper       | Mass | 55.0  | 3.3  | 32  | 49.7  | 2.9  | 16   | <0.001 |
|                                   | Wing | 90.6  | 2.8  | 31  | 86.9  | 3.3  | 18   | <0.001 |
| 1049 Drakensberg Prinia           | Mass | 10.9  | 1.3  | 47  | 10.2  | 0.8  | 36   | <0.001 |
|                                   | Tail | 66.2  | 13.6 | 40  | 63.6  | 4.5  | 27   | 0.337  |
|                                   | Wing | 54.2  | 1.8  | 47  | 52.1  | 2.0  | 37   | <0.001 |
| 1104 Karoo Thrush                 | Mass | 75.1  | 13.3 | 77  | 76.4  | 13.8 | 210  | 0.812  |
|                                   | Tail | 105.8 | 7.9  | 50  | 101.3 | 8.1  | 153  | 0.001  |
|                                   | Wing | 125.9 | 12.2 | 79  | 121.7 | 12.4 | 215  | 0.002  |
| 1171 Orange River White-eye       | Mass | 9.9   | 0.9  | 26  | 10.2  | 0.8  | 90   | 0.126  |
|                                   | Tail | 49.2  | 1.6  | 21  | 46.1  | 4.6  | 71   | 0.004  |
|                                   | Wing | 61.2  | 1.6  | 27  | 58.9  | 2.0  | 84   | <0.001 |
| 1172 Cape White-eye               | Mass | 11.4  | 0.9  | 860 | 11.4  | 0.9  | 1607 | 0.664  |
|                                   | Tail | 47.8  | 2.0  | 421 | 47.3  | 1.8  | 896  | 0.002  |
|                                   | Wing | 60.6  | 1.8  | 753 | 59.7  | 1.9  | 1549 | <0.001 |
| 1508 Southern Red-billed Hornbill | Mass | 162.0 | 17.9 | 236 | 142.9 | 13.6 | 173  | <0.001 |
|                                   | Tail | 203.4 | 11.5 | 197 | 191.9 | 12.1 | 149  | <0.001 |
|                                   | Wing | 182.7 | 6.5  | 238 | 173.5 | 6.2  | 172  | <0.001 |
| 4102 Black-headed Canary          | Mass | 11.9  | 0.8  | 29  | 11.3  | 0.7  | 33   | 0.009  |
|                                   | Wing | 66.2  | 2.0  | 26  | 63.9  | 1.9  | 38   | <0.001 |
| 4127 Karoo Long-billed Lark       | Mass | 42.0  | 3.9  | 20  | 33.8  | 4.7  | 27   | <0.001 |
|                                   | Tail | 80.5  | 3.1  | 20  | 73.0  | 5.2  | 23   | <0.001 |
|                                   | Wing | 108.1 | 3.6  | 21  | 100.0 | 5.3  | 24   | <0.001 |
| 4139 Karoo Prinia                 | Mass | 9.9   | 1.0  | 121 | 9.8   | 4.2  | 178  | 0.252  |
|                                   | Tail | 71.8  | 12.5 | 40  | 66.3  | 4.9  | 72   | 0.001  |
|                                   | Wing | 52.6  | 6.3  | 87  | 50.1  | 1.9  | 148  | <0.001 |
| 4142 Southern Grey-headed Sparrow | Mass | 23.9  | 1.6  | 206 | 24.7  | 1.9  | 174  | 0.556  |
|                                   | Tail | 63.5  | 2.6  | 150 | 61.6  | 2.5  | 138  | <0.001 |
|                                   | Wing | 82.4  | 2.5  | 155 | 80.7  | 2.3  | 154  | <0.001 |
| 4154 Bleating Warbler (pre-split) | Mass | 12.2  | 2.1  | 38  | 12.1  | 4.4  | 74   | 0.402  |
|                                   | Wing | 54.7  | 2.3  | 13  | 52.3  | 2.7  | 37   | 0.007  |
